# Supplementary material for: The regulatory effect of blood group on ferritin levels in aging: a retrospective study
Source: PeerJ. 2025 Apr 14;13:e19281. doi: 10.7717/peerj.19281 (PMC12005183; doi:10.7717/peerj.19281)
Supplement: Supplemental Information 1 — The specific values of all individual detection variables for reviewer analysis validation. [file peerj-13-19281-s001.xls]

## Sheet: data
gender	age	blood type	Fer	ALT	AST	Cr	GGT	ALP	GLOB	A/G	Glu	HDL-C	LDL-C	sd LDL-C	Lpa	APOA1	LDH	LDH1	CK	CK-MB	α-HBDH	NT-pro B	TnT	Mb	TSH	FT4	FT3	T3	IL-6
1	109	2	82.68	3	22	284	17	51	22.8	0.9	6.2	1.23	2.9	0.8494	249.3	0.9	167	32	321	5	164	8154	0.04	1616	0.02	14.44	2.49	0.94	81.63
1	102	0	303.21	8	19	89	38	82	22.2	1.5	7.31	1.23	2.9	0.97	274.1	0.81	606	42	31	13	287	5042	0.12	88.53	2.75	15.86	4.24	1.49	14.22
2	100	0	303.21	11	21	145	17	82.51	28.4	1.1	9.6	1.23	2.9	0.8494	224.09	1.29	253.96	43.59	119.7	17.56	178.31	1316.28	0.05	100.49	2.75	15.86	4.24	1.49	81.63
1	99	1	80.52	6	14	53	8	76	28.7	1.1	7.99	1.23	2.9	0.8494	137.4	1	226	39	31	29	224	330.9	0.03	37.98	14.29	9.71	3.25	1.2	81.63
2	99	1	303.21	18	52	119	43	82.51	27.01	1.55	3.98	1.23	2.9	0.8494	224.09	1.29	288	52	289	66	213	983.4	0.08	2168	2.75	15.86	4.24	1.49	81.63
1	99	0	729.9	8	10	72	18	57	28.2	1.1	6.6	1.23	2.9	0.8494	3.5	0.6	146	32	28	4	140	708.3	0.02	29.02	0.85	14.86	2.53	1.04	81.63
1	98	3	589.3	10	11	80	25	56	19.6	1.7	6.46	1.23	2.9	0.8494	131.3	0.8	159	46	12	5	165	4384	0.06	41.89	3.28	13.5	3.08	0.95	81.63
1	97	2	39.05	14	29	276	14	52	25	1	10.56	1.23	2.9	0.49	435	0.59	312	61	57	14	280	0	1.45	209.7	2.37	11.71	2.51	0.99	75.61
2	96	1	303.21	18	22	111	14	48	29.7	1.4	6.32	1.61	3.81	0.51	42	1.73	196	36	432	14	213	1316.28	0.05	100.49	3.82	14.3	3.71	1.24	81.63
1	96	0	1792	8.1	11.9	54	16.5	83	25.1	1.2	5.24	1.45	1.77	0.14	116	0.96	252	67.4	92	9	230	1202	0.09	317.1	4.23	11.8	1.72	0.69	77.19
1	95	2	48.68	6	13	36	22	74	24.8	1.1	4.92	1.23	2.9	0.3	40	0.5	206	23	10	6	158	1088	0.01	0	2.49	13.45	2.08	0.75	81.63
2	95	0	303.21	29	26	42	27	60	21.3	1.5	4.84	1.23	2.9	0.95	242.7	1.36	242	44	256	7	187	838.3	0.01	53.32	2.75	15.86	4.24	1.49	7.11
1	95	0	303.21	20	26	61	13	40	21.4	1.6	6.69	1.26	2.08	0.33	404	1.26	253.96	43.59	119.7	17.56	178.31	843.3	0.02	48.86	2.75	15.86	4.24	1.49	36.49
1	95	1	101	12	24	61	30	61	27.1	1.2	4.91	0.92	1.87	0.37	331	1.11	186	42	76	8	159	2062	0.04	50.05	2.55	16.8	3.64	1.35	20.31
1	95	1	0	197	552	200	444	1012	24.4	1	4.98	1.23	2.9	5.48	10.3	0.19	316	29	11	5	193	709.6	0.04	96.29	1.2	12.65	1.87	0.37	76.58
1	95	3	303.21	27	23	61	43	82.51	27.01	1.55	4.78	1.23	2.9	0.8494	224.09	1.29	140	31	28	10	130	1316.28	0.05	100.49	2.75	15.86	4.24	1.49	81.63
1	95	0	387.74	13	24	306	64	42	20.5	1.4	4.43	1.23	2.9	0.68	256.2	1.28	284	48	354	16	226	8707	0.09	120.1	1.66	11.31	1.78	0.62	31.99
1	95	1	268	10	20	97	35	40	27.4	1.3	4.86	1.03	2.2	0.42	133	1.19	178	29	83	11	140	510.4	0.03	89.48	4.03	18.7	3.66	1.45	5.62
2	94	0	244.9	24	31	64	19	88	25.2	1.8	4.74	1.23	2.9	0.39	176.6	1.08	153	34	108	8	134	1316.28	0.05	100.49	3.29	16.48	4.17	1.6	81.63
2	94	2	57.78	11	18	57	24	70	24.7	1.4	4.91	1.23	2.9	1.2	43	1.05	132	21	12	8	91	84.6	0.01	0	3.2	14.93	3.03	1.12	8.47
2	93	2	274	15	25	65	17	70	25.2	1.5	4.34	1.23	2.9	0.44	390	0.75	322	66	60	13	283	1388	0.12	30.41	3.91	16.6	2.8	0.99	277.9
2	93	2	84.14	21	32	56	24	61	27.1	1.4	6.3	1.23	2.9	1.51	312	1.36	390	55	204	11	253	614.9	0.01	99.62	2.42	12.55	3.48	1.22	12.69
1	93	3	579.14	9	16	46	26	68	30.7	1.1	3.43	1.23	2.9	0.8494	224.09	1.29	253.96	43.59	119.7	17.56	178.31	171.5	0.03	38.62	2.75	15.86	4.24	1.49	81.63
1	93	2	303.21	25.06	26.4	81.06	43	82.51	27.01	1.55	5.5	1.23	2.9	0.8494	224.09	1.29	253.96	43.59	119.7	17.56	178.31	1316.28	0.05	100.49	2.75	15.86	4.24	1.49	81.63
2	93	2	308.48	10	18	267	16	113	27.2	1.3	5.45	1.23	2.9	0.26	288.6	1.23	159	30	23	3	133	6457	0.06	79.29	2.75	15.86	4.24	1.49	81.63
2	92	1	354	7	16	32	72	96	24.4	1.3	5.48	1.23	2.9	0.56	438	1.18	295	60	50	27	241	101.7	0.01	29.52	1.45	17.5	4.16	1.43	81.63
1	92	2	377.21	0	6	155	25	98	29.3	1.1	7.16	1.23	2.9	0.8494	224.09	1.29	253.96	43.59	119.7	17.56	178.31	0	0.11	134.9	2.75	15.86	4.24	1.49	81.63
1	92	0	303.21	27.2	33.2	126	63	56	24.8	1.4	4.61	0.68	2.29	0.6	390.3	0.61	184	42	25	7	157	1889	0.08	201.5	2.75	15.86	4.24	1.49	53.74
1	92	2	303.21	25.06	26.4	81.06	43	82.51	27.01	1.55	5.5	1.23	2.9	0.8494	224.09	1.29	253.96	43.59	119.7	17.56	178.31	1316.28	0.05	100.49	2.75	15.86	4.24	1.49	81.63
2	91	2	138.5	6	14	60	10	56	26.8	1.3	5.16	1.23	2.9	0.62	630.2	1.25	253.96	43.59	119.7	17.56	178.31	1296	0.02	214	2.75	15.86	4.24	1.49	81.63
1	91	2	679.8	16	18	69	24	91	36	1	4.6	1.23	2.9	0.68	151.9	0.68	178	30	36	9	129	261.9	0.02	27.14	2.43	14.8	4.18	1.64	9.38
1	91	0	571.33	16	19	112	27	69	38.1	0.9	4.24	0.85	2.13	0.41	118	0.99	131	23	23	6	97	698.9	0.03	31.42	2.86	16.8	3.33	1.14	21.9
2	91	0	303.21	6	16	86	43	82.51	27.01	1.55	6.39	1.23	2.9	0.8494	224.09	1.29	161	32	27	10	122	1316.28	0.05	100.49	2.75	15.86	4.24	1.49	5.38
1	91	1	303.21	18	25	61	18	47	24.5	1.4	5.01	1.23	2.9	0.81	158.1	0.98	191	38	33	11	138	347.7	0.01	23.25	2.75	15.86	4.24	1.49	285.8
2	90	1	197.3	17	18	39	28	56	17.7	2.1	2.73	1.23	2.9	0.8494	196.1	1.1	280	46	35	9	255	378.1	0.01	21.99	1.66	15.94	3.88	1.4	81.63
2	90	0	303.21	9	15	272	43	82.51	27.01	1.55	5.5	1.23	2.9	0.8494	224.09	1.29	343	62	42	20	257	1316.28	0.05	100.49	2.75	15.86	4.24	1.49	81.63
2	90	0	303.21	22	27	91	16	71	25.7	1.6	5.82	1.23	2.9	0.64	211.1	1.07	197	35	134	13	145	1316.28	0.05	100.49	2.75	15.86	4.24	1.49	81.63
2	90	3	89.36	19.3	26.9	130	32.5	76	31.4	1.4	6.84	1.56	3.4	1.2	229	1.88	186	34.4	112	12	147	1316.28	0.05	100.49	3.16	14.21	3.68	1.6	81.63
1	90	2	91.01	14	18	89	22	105	21.6	1.8	5.03	1.23	2.9	0.8494	479.9	0.7	166	38	83	12	157	118.7	0.03	42.29	8.35	18.97	3.2	1.12	81.63
2	90	1	275.4	10	23	74	11	48	28	1.6	4.44	1.23	2.9	0.52	43.1	1.72	217	53	250	9	199	318.4	0.01	49.33	5.38	15.98	3.41	1.2	81.63
1	89	1	303.21	13	21	82	19	56	25.5	2	5.78	1.23	2.9	0.92	186.5	1.55	145	33	63	6	125	335	0.01	28.83	2.75	15.86	4.24	1.49	81.63
1	89	2	500.95	7	19	313	72	86	25.6	1.3	4.99	1.23	2.9	0.8494	224.09	1.29	151	33	36	13	141	0	0.09	103.7	2.75	15.86	4.24	1.49	81.63
1	89	2	405	11	19	93	19	60	26.6	1.2	4.73	0.97	3.84	0.96	250	1.18	167	31	47	9	141	49.1	0.01	41.6	1.01	13.5	3.83	1.43	7.86
1	89	2	303.21	10	19	43	16	109	25.5	1.1	4.99	1.23	2.9	0.39	258	1.41	236	54	130	9	198	642.3	0.03	176.5	2.75	15.86	4.24	1.49	81.63
1	89	0	303.21	23	37	87	11	50	30.5	0.9	5.1	0.88	2.06	0.48	497	0.89	219	39	74	9.9	168	1316.28	0.05	100.49	6.16	14.6	2.37	0.87	81.63
1	89	2	298	10	25.1	62	12	53	26.6	1.4	4.7	1.04	2.61	0.59	701	1.07	154	26.9	139	11	121	74.9	0.02	57.04	1.81	20.3	4.23	1.4	11.83
2	88	1	49.14	8	10	59	8	92	15.6	2.2	4.52	1.23	2.9	0.43	437.3	1.32	181	34	14	11	137	95	0.01	29.58	0.46	16.08	2.62	0.89	3.62
1	88	3	317.4	10	19	73	16	47	20.2	2.3	5.29	1.23	2.9	0.91	331.7	1.47	194	40	90	10	149	70.8	0.01	25.81	1.52	15.87	4.06	1.17	81.63
2	88	2	201.8	10	13	50	19	60	20.4	1.6	3.87	1.23	2.9	0.8494	34.1	1.1	253.96	43.59	119.7	17.56	178.31	116.3	0.01	31.12	2.75	15.86	4.24	1.49	81.63
1	88	0	309	42.1	37.7	43	19.3	77	23.7	1.3	4.77	1.05	1.9	0.42	196	1.11	142	23.8	49	48	110	96.1	0.01	0	1.21	11.1	3.12	0.92	15.18
2	88	0	109	7.6	13.4	67	10.9	52	17.3	2.1	7.36	0.81	1.97	0.76	169	1.01	253.96	43.59	32	6.7	178.31	146.2	0.01	22.87	0.84	16.4	3.69	1.46	2.88
1	88	3	303.21	7	12	76	9	151	22.2	1.5	4.81	1.23	2.9	0.8494	13.4	1.1	233	55	25	7	194	161.2	0.02	0	2.75	15.86	4.24	1.49	81.63
2	87	2	444	12	22	65	17	45	21.3	1.5	4.95	1.23	2.9	0.47	179	0.69	209	44	53	8	182	337.5	0.01	51.84	2.04	16.7	4.04	1.78	33.5
2	87	2	303.21	25.06	26.4	81.06	43	82.51	27.01	1.55	5.5	1.23	2.9	0.8494	224.09	1.29	253.96	43.59	119.7	17.56	178.31	1316.28	0.05	100.49	2.75	15.86	4.24	1.49	81.63
2	87	2	171	11	18	51	13	75	19.7	1.9	5.01	1.23	2.9	0.28	490	1.37	237	37	50	14	156	244.9	0.02	144.5	2.73	15.6	3.82	1.65	7.81
2	87	2	53	10	17.8	31	9.6	103	21.9	1.6	4.62	1.43	2.54	0.7	55	1.42	140	24.9	23	26	111	204.7	0.01	0	3.76	14.9	3.27	1.24	81.63
2	87	0	381.1	9	12	46	19	63	16.1	1.8	4.33	1.23	2.9	0.89	224.4	0.71	194	36	47	37	151	28.2	0.02	0	2.1	17.47	3.58	1.21	81.63
2	87	0	27	10	15	64	13	70	27	1.4	4.99	0.67	1.49	0.52	72	0.91	171	29	64	9	133	110.1	0.01	35.91	2.42	11.4	4.23	1.36	7.71
2	87	1	303.21	10	18	112	20	82.51	36.1	1	4.93	1.23	2.9	0.8494	224.09	1.29	181	30	90	11	130	1316.28	0.05	100.49	2.75	15.86	4.24	1.49	81.63
1	87	3	22	16	17	83	33	72	23.9	1.7	5.38	0.73	2.11	0.49	190	1.4	166	30	94	10	119	1115	0.01	43.66	2.75	15.86	4.24	1.49	81.63
1	87	1	256.48	19	24	66	12	50	25.6	1.3	5.35	1.23	2.9	0.49	141.1	0.93	175	34	44	13	129	124.5	0.01	42.99	1.94	16.1	3.5	1.37	13.47
2	86	0	303.21	4	14	55	30	40	20	1.9	4.3	1.23	2.9	0.92	223	1.12	253.96	43.59	119.7	17.56	178.31	115	0.01	0	2.84	13.13	3.94	1.53	81.63
2	86	1	48.37	18	27	59	15	100	27.6	1.8	6.33	1.82	2.37	0.4	55	1.91	248	53	72	17	182	1316.28	0.05	100.49	2.88	15.08	4.6	1.36	81.63
2	86	1	303.21	13	22	69	24	79	26.9	1.6	4.71	1.23	2.9	0.88	364.1	1.36	253.96	43.59	38	17.56	178.31	1316.28	0.05	100.49	2.21	13.51	4.29	1.22	81.63
2	86	1	482.6	6	11	286	25	69	30.3	1.3	4.59	1.23	2.9	0.8494	224.09	1.29	191	38	52	5	144	4781	0.04	131.3	2.75	15.86	4.24	1.49	81.63
2	86	0	243.2	10	17	56	21	83	24.3	1.6	4.93	1.23	2.9	1.12	37.9	1.48	168	29	109	10	133	168.1	0.01	33.98	2.75	15.86	4.24	1.49	81.63
1	86	1	303.21	11.4	17.2	77	21.9	61	26.4	1.4	5.98	1.23	2.9	0.8494	224.09	1.29	208	40	47	14	174	1316.28	0.05	100.49	2.75	15.86	4.24	1.49	143.7
2	86	0	303.21	25.06	26.4	81.06	43	82.51	27.01	1.55	5.5	1.23	2.9	0.8494	224.09	1.29	253.96	43.59	119.7	17.56	178.31	1316.28	0.05	100.49	2.75	15.86	4.24	1.49	81.63
2	86	3	185.1	10	19	47	148	52	27	1.3	5.09	1.23	2.9	0.8	42	1.06	234	36	198	15	184	1316.28	0.05	100.49	2.75	15.86	4.24	1.49	81.63
1	86	1	568	16.7	20.8	65	23.1	44	30.4	1.2	7.04	1.06	2.3	0.59	150	1.09	132	21.8	23	7.1	99	176.6	0.03	28.96	3.06	13.2	3.85	1.59	4.05
2	86	1	303.21	15	16	55	32	82.51	27.01	1.55	5.55	1.23	2.9	0.86	224.09	1.29	253.96	43.59	119.7	17.56	178.31	1316.28	0.05	100.49	2.75	15.86	4.24	1.49	81.63
1	86	1	76.78	17	20	73	13	53	19	1.9	5.04	1.23	2.9	0.73	328.6	1.4	173	38	79	14	165	1316.28	0.05	100.49	1.91	14.31	3.36	1.17	81.63
1	85	1	6.58	8	22	71	28.9	31	30.4	1.4	4.83	1.65	2.26	0.56	650	1.79	209	34.5	183	8	142	260	0.02	54.1	1.21	16.8	4.79	1.39	81.63
1	85	1	303.21	35.1	27	73	68.1	81	23	1.5	5.31	0.84	3.16	0.83	267	1.05	188	37.4	61	8	155	1316.28	0.05	100.49	2.75	15.86	4.24	1.49	81.63
2	85	2	423	22	31	40	33	55	33.9	1.2	6.17	0.79	2.58	0.43	158	0.94	238	39	55	18	198	76.1	0.01	39.79	3.68	15.2	4.27	1.87	6.26
1	85	0	858	24	21	78	28	80	22.7	1.4	6.26	0.79	2.24	0.48	164	0.81	156	29	40	5	122	360.5	0.02	39.71	0.18	12.6	2.69	0.86	4.01
1	85	2	303.21	12.8	22.3	113	19.1	67	36	1.2	5.74	1.69	1.93	0.6	414	1.71	166	31.9	99	5	132	1316.28	0.05	100.49	1.98	16.1	4.22	1.44	81.63
2	85	3	71.8	20.4	24	64	18.5	61	26	1.7	6.71	1.64	1.93	0.55	523	1.74	224	36.8	103	10.3	172	146.5	0.01	36.36	0.89	15.6	4.63	1.44	81.63
2	85	1	544.5	4	21	70	42	54	23.9	1.4	5.9	1.23	2.9	1.38	175.8	1.13	378	67	36	24	291	178.7	0.02	21.76	1.92	20.77	3.06	1.21	81.63
1	85	2	142.9	48	36	91	11.8	27	29.3	1.6	5.24	1.53	2.48	0.56	22	1.71	153	26.6	115	10	113	196.1	0.05	100.49	4.34	17.3	4.91	1.74	81.63
2	85	3	303.21	19	25.4	50	10.4	82	28.4	1.4	5.04	1.48	4.07	1.03	235	1.38	249	78.6	55	10	226	1316.28	0.05	100.49	2.75	15.86	4.24	1.49	81.63
1	85	2	303.21	18	20	39	15	69	29	1.2	5.37	0.93	1.55	0.3	58	1.09	253.96	43.59	119.7	17.56	178.31	61.8	0.03	23.03	2.75	15.86	4.24	1.49	95.89
1	85	1	98	9	60	84	20	61	24.5	1.2	4.8	1.23	2.9	0.45	64	1.16	197	44	182	47	162	247.6	0.03	118.7	1.76	13.3	3.42	0.99	81.63
1	85	0	0	8	17	47	16	66	24.7	1.3	7.03	1.23	2.9	0.55	88.2	0.51	135	23	12	6	123	230.2	0.04	33.85	1.81	17.3	2.49	0.9	9.39
1	84	2	432	14	19	59	19	139	31.7	1	5.21	1.17	2.57	0.47	707	1.27	253.96	43.59	119.7	17.56	178.31	83.2	0.02	43.51	0.63	17.8	5	1.44	38.82
1	84	3	303.21	15	14	79	26	82.51	27.01	1.55	5.5	1.03	3.61	1.46	224.09	1.29	253.96	43.59	119.7	17.56	178.31	1316.28	0.05	100.49	2.75	15.86	4.24	1.49	81.63
2	84	2	146	20	28	49	146	78	29.8	1.2	5.58	1.23	2.9	0.83	140.9	1.28	166	29	21	10	133	129.9	0.01	0	4.18	18.91	3.75	1.1	4.45
2	84	0	285	15	13	56	26.3	69	32.3	1.3	7.13	1.23	4.39	0.53	32	1.28	159	31.5	34	11	127	246.8	0.01	55.9	1.33	18.5	3.68	1.24	6.39
1	84	2	303.21	25.06	26.4	81.06	43	82.51	27.01	1.55	5.5	1.23	2.9	0.8494	224.09	1.29	253.96	43.59	119.7	17.56	178.31	1316.28	0.05	100.49	3.6	11.81	3.28	0.99	81.63
2	84	1	303.21	20	30	39	36	82.51	27.01	1.55	5.21	1.23	2.9	0.64	224.09	1.29	253.96	43.59	119.7	17.56	178.31	1316.28	0.05	100.49	2.75	15.86	4.24	1.49	81.63
1	84	3	7.15	8	8	60	27	40	21.3	1.6	4.51	1.23	2.9	0.87	110.4	0.93	113	23	27	2	87	1008	0.01	24.5	4.78	13.02	4.22	1.49	12.25
2	84	0	303.21	8	18	58	25	71	33.4	1.1	3.87	1.23	2.9	0.8494	324.9	1.1	152	33	96	11	143	663.4	0.02	29.83	2.75	15.86	4.24	1.49	81.63
1	84	2	274.4	25.5	28.3	100	42.8	82.51	24.7	1.9	6.2	1.11	1.84	0.8	224.09	1.29	249	39	208	22	210	1316.28	0.05	100.49	2.11	17.8	4.6	1.22	81.63
2	84	0	163	15	22	66	15	66	30.1	1.2	4.91	1.16	2.92	0.78	338	1.34	187	32	104	12	163	1316.28	0.05	100.49	2.75	15.86	4.24	1.49	81.63
1	83	0	7.43	5	10	62	22	54	21.8	1.6	7.58	1.23	2.9	0.8494	411.1	0.5	170	32	29	18	134	1316.28	0.05	100.49	0.76	17.06	4.25	1.51	81.63
2	83	1	303.21	25.06	26.4	100	43	82.51	27.01	1.55	5.5	1.23	2.9	0.8494	224.09	1.29	253.96	43.59	119.7	17.56	178.31	102.8	0.01	36.02	2.75	15.86	4.24	1.49	81.63
2	83	2	489.51	6	14	250	18	85	36.4	1	5.29	1.23	2.9	0.8494	224.09	1.29	253.96	43.59	119.7	17.56	178.31	1968	0.04	116.2	2.75	15.86	4.24	1.49	81.63
2	83	0	332.46	5	13	150	34	121	27.5	1.4	4.73	1.23	2.9	0.8494	224.09	1.29	131	33	19	8	118	0	0.3	127.1	2.75	15.86	4.24	1.49	81.63
2	83	1	281.9	1	9	359	12	41	30	1.2	8.05	1.23	2.9	0.8494	224.09	1.29	212	36	22	5	185	0	0.09	63.4	2.75	15.86	4.24	1.49	81.63
2	83	1	229.21	7	11	250	9	47	37.9	1.1	4.55	1.23	2.9	0.42	224.09	1.29	196	38	71	7	152	6726	0.04	114.5	4.09	17.31	2.92	0.97	81.63
2	83	1	303.21	16	18	78	18	82.51	27.01	1.55	5.09	1.23	2.9	0.8494	224.09	1.29	253.96	43.59	119.7	17.56	178.31	1316.28	0.05	100.49	2.75	15.86	4.24	1.49	81.63
2	83	2	303.21	10	15	54	12	50	21.1	1.7	4.54	1.23	2.9	0.8494	265.4	1.3	253.96	43.59	119.7	17.56	178.31	1316.28	0.05	100.49	2.75	15.86	4.24	1.49	81.63
2	83	1	303.21	15	22	57	43	106	33.8	1.1	8.14	0.83	2.88	0.46	517	1.01	180	38	41	8	139	1316.28	0.05	100.49	2.75	15.86	4.24	1.49	81.63
1	83	2	303.21	25.06	26.4	81.06	43	82.51	27.01	1.55	5.5	1.23	2.9	0.8494	224.09	1.29	253.96	43.59	119.7	17.56	178.31	1316.28	0.05	100.49	2.75	15.86	4.24	1.49	81.63
1	83	3	0	16	20	121	163	227	22.9	1.3	4.22	1.23	2.9	0.8494	135.1	0.8	457	51	59	65	413	566.7	0.05	41.55	2.75	15.86	4.24	1.49	81.63
1	83	0	303.21	25.06	26.4	81.06	43	82.51	27.01	1.55	5.5	1.23	2.9	0.8494	224.09	1.29	253.96	43.59	119.7	17.56	178.31	1316.28	0.05	100.49	2.75	15.86	4.24	1.49	81.63
2	83	2	78.6	15	18.9	67	14	72	28	1.4	5.24	1	1.85	0.68	158	1.27	261	53.6	79	11	208	91.1	0.01	37.56	4.85	13	3.72	1.37	2.11
1	83	1	179.4	19	21	67	23	71	22	2.1	5.69	1.23	2.9	0.6	158.1	1.97	211	42	104	10	151	1316.28	0.05	100.49	2.31	13.38	4.9	1.73	81.63
2	83	0	592	13.5	20.3	38	11.7	128	31.3	1.1	5.24	0.92	3.11	0.78	258	1.1	160	26.6	44	7.9	127	211.9	0.05	0	2.94	11.9	2.5	1.07	68.19
2	83	1	303.21	19	18	92	13.7	82.51	27.01	1.55	6.59	1.08	1.69	0.36	224.09	1.29	253.96	43.59	119.7	17.56	178.31	1316.28	0.05	100.49	2.75	15.86	4.24	1.49	81.63
2	83	2	104.1	21	36	43	89	100	15.3	1.9	4.35	1.23	2.9	1.11	327.3	1.01	206	28	148	8	166	273.7	0.01	0	0.75	20.18	3.85	1.51	81.63
2	83	1	303.21	25.06	26.4	81.06	43	82.51	27.01	1.55	5.5	1.23	2.9	0.8494	224.09	1.29	253.96	43.59	119.7	17.56	178.31	1316.28	0.05	100.49	2.75	15.86	4.24	1.49	81.63
1	83	0	538	38	35	96	21	67	29	1.3	5.46	1.23	2.9	0.41	50	0.99	209	33	123	10	152	213.2	0.02	67.65	3.16	19.7	4.47	1.57	6.06
1	82	1	165	17	18.7	84	39	57	25.6	1.6	4.58	1.06	2.84	0.89	75	1.24	174	27.3	64	8	132	59.7	0.01	38.2	1.89	12.1	4.51	1.68	2.83
2	82	0	303.21	11	22	57	13	138	31.4	1.5	5.8	1.23	2.9	0.39	439	1.54	192	46	54	7	166	1316.28	0.05	100.49	2.75	15.86	4.24	1.49	81.63
1	82	0	303.21	13	15	90	20	52	28.3	1.4	5.3	0.89	2.21	0.5	64	1.12	200	33	112	7	154	1316.28	0.05	100.49	2.75	15.86	4.24	1.49	81.63
2	82	2	303.21	16.2	23.7	73	24	82.51	30.6	1.4	5.83	1.66	1.86	0.65	224.09	1.29	158	34	70	11	133	1316.28	0.05	100.49	2.75	15.86	4.24	1.49	81.63
2	82	2	328	21	23	86	18	56	27.5	1.4	4.85	1.23	2.9	0.48	202	1.59	253.96	43.59	119.7	17.56	178.31	80.7	0.05	100.49	0.43	18.8	4.07	1.44	81.63
2	82	2	303.21	19	59	38	20	88	26.4	1.1	4.95	1.23	2.9	0.53	142.7	0.99	278	48	219	19	235	284.4	0.04	194	2.75	15.86	4.24	1.49	32.14
2	82	1	303.21	11	19	67	53	128	22.8	1.9	5.01	1.44	3.01	0.44	235	1.53	253.96	43.59	119.7	17.56	178.31	1316.28	0.05	100.49	2.75	15.86	4.24	1.49	81.63
2	82	2	303.21	25	19	64	20	61	26.6	1.6	5.91	1.04	3.84	1.11	392	1.21	223	45	41	8	176	95.1	0.02	26.69	0.83	15.2	3.55	1.3	8.6
2	82	0	303.21	15	18	58	12.4	82.51	27.01	1.55	5.45	0.97	1.97	0.42	224.09	1.29	253.96	43.59	119.7	17.56	178.31	1316.28	0.05	100.49	2.75	15.86	4.24	1.49	81.63
2	82	1	68.4	5.3	16.4	115	11.3	34	26.4	1.3	4.65	0.89	1.98	0.49	209	0.94	195	27.2	32	9	139	496.3	0.03	33.02	1	16.7	3.67	1.2	16.12
1	82	0	1084.42	26	15	272	26	114	36.6	0.9	4.28	1.23	2.9	1.02	367.6	0.59	238	42	24	6	178	1054	0.04	56.97	2.75	15.86	4.24	1.49	81.63
1	82	2	303.21	52	41	46	44	110	24.5	1.3	5.92	1.23	2.9	0.75	159.3	0.64	220	31	190	7	175	1316.28	0.05	100.49	2.75	15.86	4.24	1.49	14.98
1	82	3	303.21	33.2	25.3	100	30.2	39	33.9	1.2	7.52	0.78	2.05	0.95	41	1.15	253.96	43.59	119.7	17.56	178.31	1316.28	0.05	100.49	2.75	15.86	4.24	1.49	81.63
1	81	0	303.21	40	53	117	90.7	137	21	1.5	5.69	0.64	2.71	0.5	551	0.77	253.96	43.59	119.7	17.56	178.31	1351	0.02	48.25	2.75	15.86	4.24	1.49	81.63
1	81	1	303.21	12	15	59	43	82.51	27.01	1.55	7.07	1.23	2.9	0.8494	224.09	1.29	142	24	57	13	127	40.1	0.01	62.14	2.75	15.86	4.24	1.49	26.2
2	81	1	151.91	12	17	66	20	77	24.6	1.9	5.57	1.01	2.1	0.58	491	1.45	188	33	59	15	144	231.5	0.01	25.22	3.24	19.2	5.02	1.83	81.63
1	81	2	107	12.4	23.3	70	20.5	82	25.1	1.8	7.07	1.32	2.67	1.02	37	1.5	442	35.5	79	27	265	1316.28	0.05	100.49	2.75	15.86	4.24	1.49	81.63
1	81	0	303.21	11	15	67	48	67	19.1	1.7	4.73	1.23	2.9	0.8494	215.9	0.5	103	21	25	3	96	1142	0.01	27.84	2.75	15.86	4.24	1.49	81.63
2	81	3	438.12	8	14	210	7	46	28.8	1.1	4.91	1.23	2.9	0.77	176.9	1.1	165	28	47	2	129	1716	0.08	169.8	0.91	15.3	2.35	0.84	81.63
2	81	2	303.21	14	19	66	14	82.51	27.01	1.55	5.53	1.23	2.9	1.63	224.09	1.29	253.96	43.59	119.7	17.56	178.31	1316.28	0.05	100.49	2.75	15.86	4.24	1.49	81.63
1	81	3	303.21	19.7	25.2	103	18.7	73	31.2	1.4	4.66	0.99	1.44	0.48	56	1.47	164	29.6	110	8	127	1316.28	0.05	100.49	2.75	15.86	4.24	1.49	81.63
1	80	0	109	17.4	19.3	98	31.6	50	28.1	1.4	5.34	1.42	3.05	0.67	382	1.21	182	33	80	17	147	1316.28	0.05	100.49	2.75	15.86	4.24	1.49	81.63
2	80	2	303.21	25.06	26.4	48	43	82.51	27.01	1.55	6.21	1.23	2.9	0.8494	224.09	1.29	253.96	43.59	119.7	17.56	178.31	1316.28	0.05	100.49	2.75	15.86	4.24	1.49	81.63
2	80	3	303.21	25.06	26.4	81.06	43	82.51	27.01	1.55	5.5	1.23	2.9	0.8494	224.09	1.29	253.96	43.59	119.7	17.56	178.31	1316.28	0.05	100.49	2.75	15.86	4.24	1.49	81.63
1	80	2	303.21	20	24	71	16	82.51	27.01	1.55	5.18	0.84	2.8	0.51	224.09	1.29	253.96	43.59	119.7	17.56	178.31	1316.28	0.05	100.49	2.75	15.86	4.24	1.49	81.63
2	80	0	303.21	21	30	49	20	62	23.2	1.6	4.6	1.23	2.9	0.65	206.6	1.09	253.96	43.59	119.7	17.56	178.31	1316.28	0.05	100.49	2.75	15.86	4.24	1.49	46.81
2	80	2	32.8	8	15	68	9	92	29.4	1.3	5.6	1.23	2.9	0.68	364	1.11	146	27	83	11	115	130	0.01	33.49	1.13	14.1	3.68	1.31	81.63
1	80	2	303.21	43	33	66	56	65	25.9	1.3	4.77	1.24	1.44	0.22	233	1.33	253.96	43.59	119.7	17.56	178.31	1316.28	0.05	100.49	2.75	15.86	4.24	1.49	81.63
1	80	2	303.21	5	7	56	7	51	19.8	1.5	7.24	0.92	1.61	0.41	444	1.18	132	34	17	12	119	620.4	0.02	25.47	0.78	20.1	3.53	1.21	7.48
1	80	1	303.21	14	16	69	24	64	35	1.2	6.07	0.89	1.42	0.28	122	1	159	33	21	18	124	224.5	0.02	82.77	2.75	15.86	4.24	1.49	31.42
1	80	1	714.27	19	42	282	60	98	33.7	0.9	8.87	1.23	2.9	0.8494	224.09	1.29	311	47	24	4	235	4379	0.19	101.4	2.75	15.86	4.24	1.49	81.63
2	79	0	64.5	9	21	62	17	81	23.4	1.9	4.76	1.23	2.9	0.91	239.2	1.28	160	37	54	7	142	148.2	0.01	26.92	1.96	15.92	4.92	1.46	81.63
1	79	0	222	9.9	18	77	17.8	37	27.3	1.5	4.9	1.09	3.69	1.43	228	1.27	117	22.7	63	7.4	107	136.9	0.01	21.01	3.86	12.7	4.26	1.55	7.23
1	79	2	303.21	36	16	78	43	82.51	27.01	1.55	5.5	1.23	2.9	0.8494	224.09	1.29	139	23	41	12	97	1316.28	0.05	100.49	2.75	15.86	4.24	1.49	72.81
1	79	0	303.21	28	24	83	17	52	22.2	2.1	5.93	1.23	2.9	0.51	127	1.19	221	31	132	12	140	129.7	0.05	100.49	1.68	18.6	5.5	1.74	81.63
1	79	0	425	22	16	87	30	78	21.1	1.8	5.33	1.23	2.9	0.73	37.2	1.01	128	18	53	5	105	110.4	0.03	23.13	4.31	13.8	4.17	1.38	81.63
2	79	2	303.21	15	16	53	18	68	25.4	1.7	7.5	1.23	2.9	0.8494	78.9	1.3	253.96	43.59	119.7	17.56	178.31	1316.28	0.05	100.49	2.75	15.86	4.24	1.49	81.63
2	79	1	103	11	15	53	19	46	28.3	1.2	5.63	1.23	2.9	1.05	152	1.1	253.96	43.59	119.7	17.56	178.31	43.5	0.01	37.53	2.75	15.86	4.24	1.49	81.63
2	79	0	303.21	53	52	81	44	82	37	1.3	6.94	1.3	3.58	1.19	161	1.53	253.96	43.59	119.7	17.56	178.31	1316.28	0.05	100.49	2.75	15.86	4.24	1.49	81.63
2	79	1	303.21	23.4	28.9	64	41.4	82.51	27.01	1.55	6.15	0.97	3.23	0.79	224.09	1.29	253.96	43.59	119.7	17.56	178.31	1316.28	0.05	100.49	2.75	15.86	4.24	1.49	81.63
1	79	2	303.21	20	33	66	91	58	29.7	1.4	8.04	0.77	2.02	0.7	9	1.09	253.96	43.59	119.7	17.56	178.31	1316.28	0.05	100.49	2.75	15.86	4.24	1.49	81.63
2	79	1	239.6	17	20	59	21	82.51	24.4	1.4	6.12	1.23	2.9	0.8494	224.09	1.29	253.96	43.59	119.7	17.56	178.31	1316.28	0.05	100.49	5.18	13.31	2.95	1	81.63
1	79	0	303.21	22	13	56	29	101	21.7	1.9	5.33	1.11	2.88	0.54	738	1.46	129	24	452	10	94	1400	0.06	88.19	2.75	15.86	4.24	1.49	81.63
1	78	2	303.21	16	24	65	23	77	32.6	1.3	5.76	1.23	2.9	1.91	110	1.54	253.96	43.59	119.7	17.56	178.31	1316.28	0.05	100.49	2.75	15.86	4.24	1.49	81.63
2	78	1	38.14	19.9	24.2	71	16	63	31.1	1.4	5.25	1.24	2.11	0.79	739	1.35	228	33	122	10.8	151	1316.28	0.05	100.49	5.29	13.8	4.81	1.86	81.63
1	78	2	303.21	21	15	76	17	64	34.8	1	5.93	0.78	2.88	0.51	580	0.85	253.96	43.59	119.7	17.56	178.31	1316.28	0.05	100.49	2.75	15.86	4.24	1.49	81.63
2	78	2	303.21	15	19	75	22	51	30.9	1.3	4.89	1.23	2.9	0.46	472.5	1.39	253.96	43.59	119.7	17.56	178.31	1316.28	0.05	100.49	2.75	15.86	4.24	1.49	81.63
2	78	2	303.21	15.6	19.3	51	13.8	56	31.1	1.5	6.03	1.02	3.19	0.92	49	1.44	169	30.6	98	10	131	64.9	0.01	34.89	2.75	15.86	4.24	1.49	81.63
1	78	3	660	26	26	71	22	58	28	1.4	5.46	0.82	3.21	0.97	101	1.06	205	29	76	15	158	93.9	0.02	27.86	2.18	16.2	4.62	1.38	2.38
2	78	0	303.21	33	31.6	61	32.9	82	28.7	1.5	6.1	1.35	3.28	1.33	236	1.58	200	30	76	14	139	1316.28	0.05	100.49	2.75	15.86	4.24	1.49	81.63
2	78	2	169	15	21	62	18	82	31.5	1.5	6.86	1.23	2.9	1.42	452	1.58	179	32	58	10	140	1316.28	0.05	100.49	0.91	15.4	4.29	2.05	81.63
2	78	2	303.21	15.3	19.6	64	15.8	78	29.7	1.2	4.57	1.04	3.31	0.77	232	1.22	179	28.9	51	21	147	1316.28	0.05	100.49	2.75	15.86	4.24	1.49	81.63
2	78	1	303.21	8	16	62	14	55	29.9	1.2	4.93	1.2	1.62	0.21	208	1.3	253.96	43.59	119.7	17.56	178.31	1316.28	0.05	100.49	2.75	15.86	4.24	1.49	81.63
1	78	1	303.21	7	18	63	10	57	25.1	1.5	4.23	1.13	2.67	0.48	184	1.26	253.96	43.59	119.7	17.56	178.31	1316.28	0.05	100.49	2.75	15.86	4.24	1.49	81.63
1	78	0	303.21	11	17	81	17	93	27.1	1.5	4.9	1.44	2.13	0.37	115	1.58	253.96	43.59	119.7	17.56	178.31	1316.28	0.05	100.49	2.75	15.86	4.24	1.49	81.63
1	78	1	303.21	37	17	64	49	93	16.5	2.2	6.56	1.23	2.9	1.39	327.5	0.62	167	37	25	9	171	78.3	0.01	22.83	2.75	15.86	4.24	1.49	81.63
1	78	2	303.21	18	18	88	16	59	24.5	1.7	5.47	1.23	2.9	0.8	100.1	1.7	253.96	43.59	119.7	17.56	178.31	340.2	0.01	23.5	2.75	15.86	4.24	1.49	81.63
1	78	0	303.21	13	20	85	16	65	22.1	2	5.24	1.68	2.05	0.45	149	1.81	253.96	43.59	119.7	17.56	178.31	1316.28	0.05	100.49	2.75	15.86	4.24	1.49	81.63
1	78	0	303.21	14	28	82	13	82.51	26.7	1.7	5.28	1.23	2.9	0.8494	224.09	1.29	253.96	43.59	119.7	17.56	178.31	1316.28	0.05	100.49	2.75	15.86	4.24	1.49	81.63
2	77	0	121.9	9	16	53	13	56	31.3	1.2	6.29	1.23	2.9	1.53	240.2	1.05	159	29	43	6	142	39.5	0.01	0	1.31	15.96	4.21	1.5	10.47
2	77	0	303.21	20.8	22.9	64	19	62	27.5	1.6	7.22	1.56	2.26	0.72	121	1.54	196	32	95	11	139	1316.28	0.05	100.49	0.02	21.2	3.26	1.07	81.63
2	77	3	113.83	16	13	55	14	59	22.3	1.3	3.51	1.23	2.9	0.71	57.9	1.01	202	32	50	15	128	1316.28	0.05	100.49	2.75	15.86	4.24	1.49	3.24
1	77	2	303.21	44.8	41.8	73	61.7	82	28	1.3	5.18	1.15	2.55	0.66	269	1.1	253.96	43.59	119.7	17.56	178.31	461.1	0	24.14	2.75	15.86	4.24	1.49	81.63
2	77	2	303.21	28	25	74	43	82.51	27.01	1.55	5.66	1.22	3.7	0.8494	224.09	1.29	186	30	56	8	134	1316.28	0.05	100.49	1.4	15.8	5.35	1.49	81.63
2	77	3	127	8	17	65	9	62	22.9	1.6	4.23	1.17	2.01	0.37	218	1.3	167	34	57	8	135	73.5	0.01	24.4	1.11	15	4.69	1.63	81.63
1	77	0	243.1	31	22	112	44	85	26.2	1.5	4.41	1.23	2.9	1.41	31.2	0.83	127	25	114	3	91	29.7	0.01	50.89	3.99	17.79	4.72	1.77	81.63
1	77	2	145	24.2	23.4	71	27	58	32	1.4	4.64	1.18	3.18	1.3	9	1.44	212	46.7	87	7	179	76.1	0.01	30.84	1.06	17.9	5.25	1.74	81.63
2	77	0	303.21	18	21	67	10	82.51	31.2	1.4	5.07	1.23	2.9	0.8494	224.09	1.29	253.96	43.59	119.7	17.56	178.31	1316.28	0.05	100.49	2.75	15.86	4.24	1.49	81.63
2	77	2	303.21	9	13	53	16	80	24.1	1.2	4.92	1.61	2.91	0.44	248	1.55	217	42	119	21	171	65.5	0	35.43	2.75	15.86	4.24	1.49	11.7
2	77	0	303.21	15	23	44	125	155	37.4	1	6.68	1.31	2.57	0.65	380	1.56	203	42	26	8	167	1316.28	0.05	100.49	2.75	15.86	4.24	1.49	81.63
2	77	0	303.21	25.06	26.4	81.06	43	82.51	27.01	1.55	5.5	1.23	2.9	0.8494	224.09	1.29	253.96	43.59	80	17.56	178.31	117.3	0.01	21.24	2.75	15.86	4.24	1.49	81.63
2	76	1	303.21	25.06	26.4	81.06	43	82.51	27.01	1.55	5.5	1.23	2.9	0.8494	224.09	1.29	253.96	43.59	119.7	17.56	178.31	1316.28	0.05	100.49	2.75	15.86	4.24	1.49	81.63
2	76	0	303.21	5	17	60	25	85	34.5	1.1	8.59	0.66	2.48	0.46	591	0.99	253.96	43.59	119.7	17.56	178.31	1316.28	0.05	100.49	2.75	15.86	4.24	1.49	81.63
2	76	0	303.21	2	11	133	43	46	27.01	1.55	5.53	1.23	2.9	0.8494	224.09	1.29	253.96	43.59	119.7	17.56	178.31	1316.28	0.05	100.49	2.75	15.86	4.24	1.49	81.63
1	76	1	70.9	12.7	19	129	13.5	56	27.6	1.6	4.91	1.07	3.1	1.05	369	1.24	174	32.7	158	10	130	126.1	0.03	95.48	4.16	16.3	4.28	1.23	81.63
1	76	0	153.1	10	15	76	23	53	25.2	1.8	7.53	1.23	2.9	0.83	151.8	1.22	199	31	71	7	165	50.5	0.01	100.49	2.75	15.86	4.24	1.49	81.63
1	76	2	303.21	45	25	86	31	82.51	27.01	1.55	6.98	1.23	2.9	0.8494	224.09	1.29	253.96	43.59	119.7	17.56	178.31	1316.28	0.05	100.49	2.75	15.86	4.24	1.49	81.63
2	76	0	232.5	11	17	58	21	65	32.9	0.8	6.34	1.23	2.9	1.52	39	0.84	227	48	45	6	177	366.5	0.01	0	2.31	14.14	3.82	1.57	28.33
2	76	0	303.21	25.06	26.4	81.06	43	82.51	27.01	1.55	5.5	1.23	2.9	0.8494	224.09	1.29	253.96	43.59	119.7	17.56	178.31	1316.28	0.05	100.49	2.75	15.86	4.24	1.49	81.63
2	76	2	303.21	12.4	11.9	57	18.5	54	26.5	1.4	6.01	0.83	2.98	0.96	179	1.11	117	23.1	296	11	98	683	0.01	47.57	2.75	15.86	4.24	1.49	46.75
1	76	2	58.9	10.1	13.7	88	22.2	43	17.7	2.3	5.6	1.01	2.09	0.66	6	1.2	140	26.7	65	5	103	47.4	0.01	29.83	1.62	16.4	5.46	2.01	81.63
1	76	3	139	15.1	18.1	69	10.8	56	25.6	1.5	4.8	1.1	3.56	0.84	77	1.14	149	25	89	11.6	127	809.5	0.01	24.54	1.63	17.7	3.7	1.39	2.91
2	76	0	303.21	25.06	26.4	81.06	43	82.51	27.01	1.55	5.5	1.23	2.9	0.8494	224.09	1.29	253.96	43.59	119.7	17.56	178.31	1316.28	0.05	100.49	2.02	14.44	5.06	1.91	81.63
1	76	1	303.21	16.5	48.7	87	9.2	64	34.4	1.3	4.81	1.39	2.63	0.59	359	1.47	311	61	200	10	240	1316.28	0.05	100.49	2.75	15.86	4.24	1.49	81.63
2	75	3	143.2	23.3	18.3	89	16.9	66	21.6	1.9	6.95	1.13	3.58	1.24	108	1.37	176	32.7	116	11	143	42.2	0.01	57.83	2.07	15.5	3.74	1.12	4.12
1	75	3	303.21	10	18	62	20	89	29.4	1.4	6.05	1.03	2.83	0.52	141	1.24	189	29	49	11	135	1316.28	0.05	100.49	2.75	15.86	4.24	1.49	81.63
2	75	1	303.21	47	51	48	31.6	44	33.5	1.2	7.33	0.86	2.17	0.86	121	1.28	253.96	43.59	119.7	17.56	178.31	1316.28	0.05	100.49	6.1	13.6	4.81	1.72	81.63
1	75	0	303.21	11	12	66	19	74	22.4	2	6.18	1.23	2.9	1.31	69.5	1.1	253.96	43.59	119.7	17.56	178.31	1316.28	0.05	100.49	2.75	15.86	4.24	1.49	81.63
1	75	2	202	23	18	69	36	63	25	1.8	8.29	1.23	2.9	0.92	83.9	0.96	204	33	148	9	148	1316.28	0.05	100.49	1.44	13.99	5.51	2.2	81.63
2	75	2	56.7	10	16	60	11	49	20	1.9	4.47	1.23	2.9	0.44	5	1.61	127	24	109	11	93	92.2	0.01	42.25	1.45	14.9	5.48	1.93	81.63
2	75	0	40.74	9	15	43	14	107	23.3	1.7	4.96	1.23	2.9	0.8494	208	1.7	178	35	38	19	150	66.2	0.01	0	3.1	18.03	5.13	1.81	81.63
1	75	0	630.66	12	14	262	11	82	27.7	1.4	3.53	1.23	2.9	0.8494	224.09	1.29	145	36	70	7	115	4997	0.04	114.3	2.75	15.86	4.24	1.49	81.63
1	75	2	59.7	15	21	111	16	53	30.1	1.5	5.3	1.23	2.9	0.34	354.6	2.07	253.96	43.59	119.7	17.56	178.31	1316.28	0.05	100.49	4.53	12.4	4.58	1.58	81.63
2	75	2	303.21	11	17	64	25	127	29.9	1.6	5.84	1.13	2.39	0.65	375	1.33	253.96	43.59	119.7	17.56	178.31	1316.28	0.05	100.49	2.75	15.86	4.24	1.49	81.63
2	75	2	127	14	16	62	18	70	29.4	1.3	4.77	1.23	2.9	0.47	99.6	1.31	243	56	35	8	227	351.2	0.01	23.29	2	16.9	4.19	1.44	81.63
1	75	0	303.21	19	23	55	28	122	26.2	1.5	5.85	1.21	3.17	0.98	141	1.54	253.96	43.59	119.7	17.56	178.31	1316.28	0.05	100.49	2.75	15.86	4.24	1.49	81.63
1	75	2	303.21	25.06	26.4	81.06	43	82.51	27.01	1.55	5.5	1.23	2.9	0.8494	224.09	1.29	253.96	43.59	119.7	17.56	178.31	1316.28	0.05	100.49	2.75	15.86	4.24	1.49	81.63
2	75	0	303.21	25	24	65	18	82.51	27.01	1.55	6.98	1.23	2.9	0.8494	224.09	1.29	253.96	43.59	119.7	17.56	178.31	1316.28	0.05	100.49	2.75	15.86	4.24	1.49	81.63
2	75	2	303.21	10	20	66	14	69	34.3	1.2	4.68	1.31	2.47	0.27	80	1.41	253.96	43.59	119.7	17.56	178.31	1316.28	0.05	100.49	2.75	15.86	4.24	1.49	81.63
1	75	2	303.21	19.1	23	92	17.1	82.51	25.9	1.7	6.11	1.23	2.9	0.88	224.09	1.29	253.96	43.59	119.7	17.56	178.31	1316.28	0.05	100.49	2.75	15.86	4.24	1.49	81.63
2	75	2	303.21	6	12.8	68	21.4	82.51	27.01	1.55	4.47	0.86	3.94	1.4	224.09	1.29	121	24.9	20	9	97	1316.28	0.05	100.49	2.75	15.86	4.24	1.49	81.63
1	75	0	303.21	25.06	26.4	81.06	43	82.51	27.01	1.55	5.5	1.23	2.9	0.8494	224.09	1.29	253.96	43.59	119.7	17.56	178.31	1316.28	0.05	100.49	2.75	15.86	4.24	1.49	81.63
1	75	1	303.21	25.06	26.4	81.06	43	82.51	27.01	1.55	5.5	1.23	2.9	0.8494	224.09	1.29	253.96	43.59	119.7	17.56	178.31	1316.28	0.05	100.49	2.75	15.86	4.24	1.49	81.63
2	75	1	303.21	34	41	54	39	82.51	27.01	1.55	5.7	1.01	3.85	0.97	224.09	1.29	253.96	43.59	119.7	17.56	178.31	1316.28	0.05	100.49	2.75	15.86	4.24	1.49	81.63
2	75	0	303.21	17	21	78	14	49	26.1	1.7	4.86	1.23	2.9	0.66	53.6	1.69	253.96	43.59	119.7	17.56	178.31	1316.28	0.05	100.49	2.75	15.86	4.24	1.49	81.63
1	75	2	202.4	52	40	79	73	58	21.5	2	4.83	1.23	2.9	1.38	70.9	1.64	222	36	104	9	157	20	0.01	35.89	1.15	15.71	4.91	1.87	81.63
1	74	2	303.21	10	14	87	12	80	28	1.6	5.94	1.16	3.76	1.02	184	1.42	253.96	43.59	119.7	17.56	178.31	1316.28	0.05	100.49	2.75	15.86	4.24	1.49	81.63
2	74	1	303.21	22	23	63	17	82.51	27.01	1.55	5.83	1.23	2.9	0.48	224.09	1.29	212	37	105	12	153	1316.28	0.05	100.49	2.75	15.86	4.24	1.49	81.63
2	74	2	303.21	24	22	56	29	82.51	27.01	1.55	6.8	1.23	2.9	0.66	224.09	1.29	253.96	43.59	119.7	17.56	178.31	1316.28	0.05	100.49	2.75	15.86	4.24	1.49	81.63
2	74	1	303.21	18	24	66	12	82.51	27.01	1.55	5.09	1.2	2.59	0.71	224.09	1.29	253.96	43.59	119.7	17.56	178.31	1316.28	0.05	100.49	2.75	15.86	4.24	1.49	81.63
1	74	3	303.21	35	28	93	24	79	27.7	1.6	5.42	1.2	3.38	0.68	363	1.48	253.96	43.59	119.7	17.56	178.31	1316.28	0.05	100.49	2.75	15.86	4.24	1.49	81.63
2	74	1	272	21.5	23.5	86	21.6	45	29.6	1.6	8.9	1.42	1.85	0.78	107	1.69	197	28.3	54	12	142	1316.28	0.05	100.49	4.93	19.9	3.92	1.18	81.63
1	74	0	303.21	22.2	29.1	96	24.9	50	38.3	1	6.49	1.29	2.67	0.81	404	1.16	198	41.3	134	16	157	1316.28	0.05	100.49	2.75	15.86	4.24	1.49	81.63
2	74	1	303.21	25.06	26.4	81.06	43	82.51	27.01	1.55	5.5	1.23	2.9	0.8494	224.09	1.29	253.96	43.59	119.7	17.56	178.31	1316.28	0.05	100.49	2.75	15.86	4.24	1.49	81.63
1	74	3	303.21	17.8	25.4	83	33.6	40	32.5	1.4	4.94	1.62	3.44	0.67	137	1.64	253.96	43.59	119.7	17.56	178.31	1316.28	0.05	100.49	2.75	15.86	4.24	1.49	81.63
1	74	2	381.2	33	26	75	86	112	32.6	1	4.95	1.23	2.9	0.57	89	0.88	156	32	50	7	120	295	0.02	28.23	1.62	18.38	4.26	1.69	81.63
2	74	1	684	9	17	47	14	54	28.6	1.4	4.14	1.49	1.97	0.14	69	1.42	164	30	39	9	132	98.7	0.01	28.43	0.3	14	3.22	1.06	5.58
2	74	3	303.21	23	18	57	25	58	23.4	1.3	6.61	0.69	2.39	0.48	66	0.8	221	33	29	5	158	1316.28	0.05	100.49	2.75	15.86	4.24	1.49	17.87
2	74	1	61.78	21	25	61	16	79	21.8	2.1	5.36	1.23	2.9	0.92	144.1	1.97	253.96	43.59	119.7	17.56	178.31	112	0.05	100.49	4.36	15.43	5.06	1.97	81.63
1	74	1	97.8	18.4	22.3	122	74.9	145	28.9	1.1	4.59	0.85	2.11	0.65	246	0.89	253.96	43.59	119.7	17.56	178.31	281.3	0.02	56.18	2.6	13.1	6.63	1.57	67.92
2	74	0	55.6	30	30	51	8	65	26.8	1.6	6.5	1.64	1.53	0.35	10	1.84	218	47	177	19	175	90.5	0.01	43.67	1.4	17.9	4.38	1.38	2.38
1	74	3	303.21	16.4	17.9	66	35.7	48	20.9	1.8	4.47	1.11	2.29	1.01	579	1.61	253.96	43.59	119.7	17.56	178.31	1316.28	0.05	100.49	2.75	15.86	4.24	1.49	81.63
1	74	2	147	22.1	30.7	170	52.5	128	34.1	1	5.07	0.76	1.39	0.35	434	0.93	188	43.3	50	12	161	741.5	0.02	29.66	0.55	19.3	2.57	0.75	14.74
1	74	2	215	34	24	67	92	100	25.7	1.7	7.62	0.71	4.34	0.74	117	1.15	167	28	70	5	131	39.4	0.01	52.28	3.4	15.3	4.71	1.74	16.92
1	74	3	326	13	17	80	27.5	78	23.3	1.8	3.85	1.38	3.01	0.63	49	1.3	179	28.4	51	7	121	43.5	0.01	33.3	0.43	15.4	3.37	1.13	2.35
1	74	2	303.21	23	23	78	17	77	27.9	1.5	5.55	1.25	3.37	0.65	6	1.35	253.96	43.59	119.7	17.56	178.31	1316.28	0.05	100.49	2.75	15.86	4.24	1.49	81.63
1	74	2	303.21	15.1	21.9	78	37.5	55	25.2	1.4	4.36	1.25	2.96	0.79	183	1.29	253.96	43.59	119.7	17.56	178.31	1316.28	0.05	100.49	2.75	15.86	4.24	1.49	81.63
2	74	3	303.21	13.8	15.8	77	69.8	101	27	1.4	5.63	1.31	3.92	0.86	323	1.57	164	25.2	60	12	127	30.1	0.01	23.9	2.75	15.86	4.24	1.49	81.63
1	74	0	303.21	17	20	81	20	87	22.7	1.9	5.1	1.23	2.9	0.52	72	1.29	253.96	43.59	119.7	17.56	178.31	1316.28	0.05	100.49	2.75	15.86	4.24	1.49	81.63
2	74	2	229.4	38	32	47	14	84	34.6	1.2	5.04	1.23	2.9	1.12	35.6	1.22	131	23	29	6	114	165.2	0.01	0	2.37	14.47	4.46	1.67	81.63
2	73	1	325	10	19	62	17	57	20.8	2	5.57	1.23	2.9	0.56	157	1.57	253.96	43.59	119.7	17.56	178.31	1316.28	0.05	100.49	2.75	15.86	4.24	1.49	4.01
2	73	3	303.21	20	23	52	36	62	26.8	1.7	5.62	1.23	2.9	0.8494	224.09	1.29	253.96	43.59	119.7	17.56	178.31	1316.28	0.05	100.49	2.75	15.86	4.24	1.49	81.63
2	73	0	303.21	13	24	48	10.7	51	25.8	1.7	5.51	1.55	3.06	0.72	51	1.81	253.96	43.59	119.7	17.56	178.31	1316.28	0.05	100.49	2.75	15.86	4.24	1.49	81.63
2	73	1	303.21	14	17	75	30	60	27.9	1.6	5.91	1.23	2.9	0.87	89	1.27	185	34	236	13	136	1316.28	0.05	100.49	1.74	15.3	5.31	2.14	81.63
1	73	2	48.18	10	10	138	12	66	24.7	1.2	2.28	1.23	2.9	0.8494	224.09	1.29	140	31	22	6	110	6587	0.07	145.9	2.75	15.86	4.24	1.49	81.63
1	73	0	303.21	16.4	18.6	55	21.6	82.51	27.01	1.55	5.44	0.89	2.27	0.52	224.09	1.29	253.96	43.59	119.7	17.56	178.31	1316.28	0.05	100.49	2.75	15.86	4.24	1.49	81.63
2	73	0	0	7	15	56	260	77	25.5	1.4	4.22	1.23	2.9	0.3	246	0.98	153	33	39	9	126	1254	0.02	37.61	1	13.3	2.9	0.97	20.43
1	73	2	303.21	13	26	75	66	82.51	30.3	1.1	4.88	1.23	2.9	0.8494	224.09	1.29	253.96	43.59	119.7	17.56	178.31	1316.28	0.05	100.49	2.75	15.86	4.24	1.49	81.63
2	73	1	303.21	63	54	52	111	82.51	27.01	1.55	5.85	1.45	1.82	0.35	224.09	1.29	253.96	43.59	119.7	17.56	178.31	1316.28	0.05	100.49	2.75	15.86	4.24	1.49	81.63
1	73	1	303.21	52	31	109	35.3	80	24.8	1.8	4.93	1.03	2.99	0.78	112	1.29	253.96	43.59	119.7	17.56	178.31	1316.28	0.05	100.49	2.75	15.86	4.24	1.49	81.63
1	73	3	303.21	17	22	74	17	37	27.8	1.6	5.43	1.09	2.81	0.55	205	1.26	253.96	43.59	119.7	17.56	178.31	1316.28	0.05	100.49	2.75	15.86	4.24	1.49	81.63
2	73	0	455	23	19	57	34	99	24.6	1.5	4.62	1.08	3.43	1.04	360	1.35	253.96	43.59	119.7	17.56	178.31	102.6	0.03	0	3.56	11.4	3.69	1.56	4.12
1	73	0	303.21	22.1	43.9	102	43	82.51	27.01	1.55	5.11	1.23	2.9	0.8494	224.09	1.29	378	34.5	31	14.5	260	433.1	0.01	100.49	2.75	15.86	4.24	1.49	81.63
2	73	2	109	34	45	48	45.4	63	34.6	1.1	3.59	1.12	2.31	0.86	27	1.33	193	31.8	90	12	141	135.6	0.01	43.73	3.32	13.7	3.89	1.12	3.39
2	73	2	318.1	25	28	84	52	118	37.9	1	4.97	1.23	2.9	0.92	198.6	1.2	268	38	91	13	180	6.2	0.02	0	1.39	17.46	4.73	2.18	5.9
1	73	1	303.21	17.1	20.1	96	34.8	64	31.6	1.4	5.12	1.17	4.1	1.58	96	1.33	253.96	43.59	119.7	17.56	178.31	1316.28	0.05	100.49	2.75	15.86	4.24	1.49	81.63
1	73	0	303.21	13.7	24.9	83	14.3	68	31.5	1.4	5.26	0.81	1.56	0.65	63	1.23	253.96	43.59	119.7	17.56	178.31	1316.28	0.05	100.49	2.75	15.86	4.24	1.49	81.63
1	73	0	303.21	14	12	77	67	82.51	27.01	1.55	3.99	1.23	2.9	0.6	224.09	1.29	253.96	43.59	119.7	17.56	178.31	1316.28	0.05	100.49	2.75	15.86	4.24	1.49	81.63
2	72	0	303.21	13.1	21	64	16.9	71	33.3	1.3	5.59	1.66	1.48	0.33	465	1.64	253.96	43.59	119.7	17.56	178.31	1316.28	0.05	100.49	1.17	20.4	4.98	1.83	81.63
2	72	0	303.21	12	29	71	17	114	37.6	1.3	5.54	1.08	2.58	0.74	110	1.33	253.96	43.59	119.7	17.56	178.31	1316.28	0.05	100.49	2.75	15.86	4.24	1.49	81.63
2	72	2	812.7	36	22	57	59	67	20.7	1.7	5.51	1.23	2.9	0.71	53.8	1.16	288	52	37	8	228	287.9	0.01	31.49	0.39	20.66	3.35	0.88	81.63
2	72	1	303.21	37	43	60	43	82.51	27.01	1.55	5.16	1.23	2.9	0.8494	224.09	1.29	192	37	70	6	143	27.9	0.01	0	2.75	15.86	4.24	1.49	81.63
2	72	0	303.21	51	51	62	33.4	86	30	1.5	8.46	1.15	2	0.77	224.09	1.29	168	29	52	12	136	1316.28	0.05	100.49	2.75	15.86	4.24	1.49	81.63
2	72	3	73.7	8.3	16.3	64	10.6	69	24	1.6	4.76	1.28	1.56	0.41	65	1.4	163	39	49	8	136	115.2	0.01	26.31	1.7	12.9	4.25	1.52	2.5
2	72	1	303.21	10	14	64	18.9	82.51	27.01	1.55	4.97	0.66	2.19	0.89	224.09	1.29	253.96	43.59	119.7	17.56	178.31	1316.28	0.05	100.49	2.75	15.86	4.24	1.49	81.63
1	72	0	303.21	23	20	52	19	52	22.1	2.1	6.02	1.23	2.9	0.8494	263.6	1.05	159	26	87	10	121	1316.28	0.05	100.49	2.75	15.86	4.24	1.49	81.63
2	72	2	242	38.5	38.9	64	28.1	57	30.4	1.4	5.93	1.24	3.34	1.48	88	1.41	253.96	43.59	119.7	17.56	178.31	189.8	0	27.28	0.91	15.5	4	1.7	2.3
2	72	2	303.21	10	16	64	18	51	26	1.7	5.19	1.23	2.9	1.52	315.3	1.59	217	25	157	7	164	65.4	0	0	2.75	15.86	4.24	1.49	81.63
1	72	2	303.21	20	18	69	55	84	29.8	1.3	6.21	0.96	2.71	0.87	181	1.19	197	46	48	10	165	1316.28	0.05	100.49	2.75	15.86	4.24	1.49	81.63
2	72	1	69.2	24	28	68	49	58	26	1.6	5.29	1.21	2.58	0.93	205	1.52	163	27	42	8	117	112.2	0.01	31.92	1.98	16.2	5.1	2.08	3.81
1	72	0	186	18	16	78	28	62	23.3	1.7	5.51	1.23	2.9	1.62	551.5	0.9	170	34	66	13	133	32.2	0.01	35.6	0.82	14.85	5.95	1.5	81.63
2	72	3	303.21	25.06	26.4	81.06	43	82.51	27.01	1.55	5.5	1.23	2.9	0.8494	224.09	1.29	253.96	43.59	119.7	17.56	178.31	1316.28	0.05	100.49	1.2	14.6	5.33	1.65	81.63
1	72	2	96.4	26.5	31.6	79	29	102	25.8	1.7	5.66	1.4	3.17	0.79	60	1.41	162	32	106	13	130	49.4	0.01	33.4	2.84	15.3	4.53	1.87	81.63
2	72	2	303.21	25.06	26.4	81.06	43	82.51	27.01	1.55	5.5	1.23	2.9	0.8494	224.09	1.29	253.96	43.59	119.7	17.56	178.31	1316.28	0.05	100.49	2.75	15.86	4.24	1.49	81.63
1	72	2	303.21	14	21	86	34	82.51	27.01	1.55	5.01	1.12	2.5	0.42	224.09	1.29	253.96	43.59	119.7	17.56	178.31	1316.28	0.05	100.49	2.75	15.86	4.24	1.49	81.63
2	72	2	267	18	18	54	28	66	20.2	2.3	4.79	1.23	2.9	0.93	81.6	1.41	207	39	192	12	161	76.5	0.01	32.03	2.09	13.4	4.42	1.8	81.63
2	72	1	303.21	25.06	26.4	81.06	43	82.51	27.01	1.55	5.5	1.23	2.9	0.8494	224.09	1.29	253.96	43.59	119.7	17.56	178.31	1316.28	0.05	100.49	2.75	15.86	4.24	1.49	81.63
1	71	0	85.59	17	28	86	17	64	21.5	2	4.81	1.23	2.9	0.75	112.3	1.25	142	31	123	7	133	1316.28	0.05	100.49	1.51	16.83	4.81	1.56	81.63
2	71	2	303.21	9	15	60	13	50	19.9	1.6	6.41	1.23	2.9	0.78	122.2	0.97	143	33	124	6	120	238.3	0.01	58.59	2.75	15.86	4.24	1.49	27.52
1	71	2	303.21	48.7	30	62	71.3	74	29.1	1.5	6.3	1.4	3.82	0.97	657	1.48	253.96	43.59	119.7	17.56	178.31	1316.28	0.05	100.49	2.75	15.86	4.24	1.49	81.63
2	71	2	303.21	19	19	55	26	53	28.5	1.6	5.17	1.23	2.9	0.59	286.3	2.07	194	35	33	7	169	1316.28	0.05	100.49	2.75	15.86	4.24	1.49	81.63
1	71	0	236.5	13	15	103	13	87	23.2	1.9	5.51	1.23	2.9	0.96	644.7	0.86	149	38	43	14	142	1316.28	0.05	100.49	2.75	15.86	4.24	1.49	81.63
1	71	0	54.66	17	20	49	29	70	25.7	1.5	4.86	1.23	2.9	1.16	144.4	1.44	180	31	45	7	151	44.7	0.01	0	1.55	18.93	5.54	1.79	18.56
1	71	0	135.8	15	44	175	86	129	28.6	1	4.46	1.23	2.9	0.8494	388.7	1.2	253.96	43.59	119.7	17.56	178.31	0	0.1	181	0.78	19.72	2.65	0.77	81.63
1	71	1	125	27	28	78	16	60	23.5	1.7	4.78	1.86	2.47	0.53	224.09	1.29	166	30	137	7	132	1316.28	0.05	100.49	2.75	15.86	4.24	1.49	81.63
2	71	2	303.21	35	29	80	29	76	28.6	1.6	7.57	1.23	2.9	0.57	187	1.57	250	45	139	17	182	1316.28	0.05	100.49	3.24	17.4	4.73	1.73	81.63
1	71	2	283.3	22	30	81	24	69	30	1.5	6.39	1.23	2.9	1.8	126.4	1.05	253.96	43.59	119.7	17.56	178.31	288.3	0.06	105.3	2.71	16.77	4.3	1.32	81.63
2	71	1	303.21	10	15	79	17	82.51	28.7	1.4	4.98	1.23	2.9	1.55	224.09	1.29	191	37	82	10	149	1316.28	0.05	100.49	3.4	12.21	4.26	1.38	2.44
2	71	2	303.21	11	16	62	21.4	82.51	27.01	1.55	4.17	1.07	3.01	0.5	224.09	1.29	253.96	43.59	119.7	17.56	178.31	1316.28	0.05	100.49	2.75	15.86	4.24	1.49	81.63
2	71	1	303.21	19	22	67	21	82.51	33.2	1.3	6.05	1.23	2.9	0.8494	224.09	1.29	253.96	43.59	119.7	17.56	178.31	1316.28	0.05	100.49	2.75	15.86	4.24	1.49	81.63
1	71	2	450.1	40	25	76	59.1	46	25.3	1.8	5.5	1.26	2.01	0.97	145	1.59	140	26.4	110	6	98	1316.28	0.05	100.49	4.08	13.8	4.53	1.24	81.63
2	71	1	303.21	25.06	26.4	81.06	43	82.51	27.01	1.55	5.5	1.23	2.9	0.8494	224.09	1.29	253.96	43.59	119.7	17.56	178.31	1316.28	0.05	100.49	2.75	15.86	4.24	1.49	81.63
2	71	2	303.21	7	16	72	25	63	27.4	1.6	4.8	1.23	2.9	1.24	73.2	1.38	253.96	43.59	119.7	17.56	178.31	1316.28	0.05	100.49	2.75	15.86	4.24	1.49	81.63
2	71	0	303.21	25.06	26.4	81.06	43	82.51	27.01	1.55	5.5	1.23	2.9	0.8494	224.09	1.29	253.96	43.59	119.7	17.56	178.31	1316.28	0.05	100.49	0.95	16.12	4.61	1.49	81.63
1	71	0	314.8	26	33	69	22	45	29.9	1.3	5.24	1.23	2.9	0.85	415.3	1.14	189	39	250	12	141	1316.28	0.05	100.49	1.62	15.26	3.83	1.39	81.63
2	71	2	303.21	32	27	54	26	82.51	27.01	1.55	4.76	1.5	4.17	0.84	224.09	1.29	253.96	43.59	119.7	17.56	178.31	1316.28	0.05	100.49	2.75	15.86	4.24	1.49	81.63
1	71	2	168	11	33	85	27	43	21.4	1.7	4.8	1.23	2.9	0.82	231	1.11	163	34	91	10	138	37.8	0.01	41.97	2.43	12.2	5.18	1.97	3.41
2	71	0	303.21	10	13	53	16	66	25	1.6	5.65	1.22	3.27	0.56	133	1.39	140	20	46	8	111	64.6	0.01	32.03	2.75	15.86	4.24	1.49	5.81
1	71	2	53.9	14	15	68	21	113	28.8	1.5	5.88	1.3	2.76	0.55	222	1.43	159	37	43	11	124	0	0.01	0	1.52	14.8	5.09	2.07	14.62
2	71	2	303.21	25.06	26.4	81.06	43	82.51	27.01	1.55	5.5	1.23	2.9	0.8494	224.09	1.29	253.96	43.59	119.7	17.56	178.31	1316.28	0.05	100.49	2.75	15.86	4.24	1.49	7.89
2	71	0	51.63	20	23	59	17	96	23.2	1.7	5.11	1.23	2.9	0.8494	35.6	1.1	188	33	51	22	157	1316.28	0.05	100.49	1.86	14.71	5.04	2.15	81.63
1	71	2	303.21	21.1	18.4	68	21	52	22.8	1.8	5.49	1.28	2.53	0.62	330	1.4	253.96	43.59	119.7	17.56	178.31	1316.28	0.05	100.49	2.75	15.86	4.24	1.49	81.63
2	71	0	303.21	25	27	56	69	102	28.2	1.3	6.02	0.87	3	0.95	25	1.08	199	39	43	10	161	1316.28	0.05	100.49	2.75	15.86	4.24	1.49	81.63
2	71	2	303.21	9	17	68	14	82.51	27.01	1.55	5.68	1.23	2.9	1.35	224.09	1.29	142	28	78	12	108	1316.28	0.05	100.49	1.54	15.78	4.58	1.58	81.63
2	71	1	0	46	59	115	25	120	21.5	1.5	5.19	1.23	2.9	0.77	93	1.19	434	34	99	10	226	101.2	0.01	26.55	5.14	12.3	4.27	1.86	81.63
1	71	0	252.8	4	31	57	69	53	21.8	1.7	3.81	1.23	2.9	1.1	46.9	0.51	142	29	76	5	116	52.8	0.01	46.88	2.6	14.2	3.86	1.22	6.57
1	71	1	303.21	35	20	101	54	82.51	27.01	1.55	6.02	1.23	2.9	0.8494	224.09	1.29	253.96	43.59	119.7	17.56	178.31	1316.28	0.05	100.49	2.75	15.86	4.24	1.49	81.63
2	71	1	303.21	12.4	16.6	51	45.8	123	30.1	1.4	4.87	1.35	2.99	0.77	215	1.43	253.96	43.59	119.7	17.56	178.31	1316.28	0.05	100.49	1.48	20.8	4.59	2.34	81.63
1	71	1	303.21	37	25	76	29	82.51	27.01	1.55	5.1	1.23	2.9	0.74	224.09	1.29	253.96	43.59	119.7	17.56	178.31	1316.28	0.05	100.49	2.75	15.86	4.24	1.49	81.63
1	71	1	303.21	57	32	105	103.6	44	21.9	1.9	4.64	0.89	3.62	1.01	324	1.12	253.96	43.59	119.7	17.56	178.31	1316.28	0.05	100.49	2.75	15.86	4.24	1.49	81.63
1	71	0	303.21	29.4	26.1	49	51.5	82.51	27.01	1.55	5.36	1.03	3.39	0.94	224.09	1.29	253.96	43.59	119.7	17.56	178.31	1316.28	0.05	100.49	2.75	15.86	4.24	1.49	81.63
1	71	2	152	85.6	142.2	71	128.9	181	38.5	0.9	4.63	1.34	2.15	0.32	19	1.26	332	87.8	410	47	302	1316.28	0.05	100.49	5.11	19.3	3.79	1.66	81.63
1	71	1	303.21	8	19	68	18	82.51	27.01	1.55	5.86	1.23	2.9	0.8494	224.09	1.29	253.96	43.59	119.7	17.56	178.31	1316.28	0.05	100.49	2.75	15.86	4.24	1.49	81.63
2	71	1	493.4	11	19	42	48	61	20.1	1.4	3.73	1.23	2.9	0.65	104.6	0.83	415	97	15	12	340	290	0.01	0	1.51	17.67	3.17	1.16	18.21
2	70	2	303.21	16	18	72	15	51	23.4	1.5	5.23	1.23	2.9	0.8494	17.7	1.8	148	30	80	15	140	96.7	0	29.31	2.75	15.86	4.24	1.49	81.63
1	70	0	303.21	11	18	74	14	74	27.6	1.7	5.35	1.47	3.27	0.71	145	1.51	177	36	97	14	134	63	0.01	33.94	1.65	14.8	4.68	1.5	81.63
2	70	0	303.21	19	19	47	20	66	20.8	2	5.28	1.23	2.9	0.8494	286.2	1.1	253.96	43.59	119.7	17.56	178.31	1316.28	0.05	100.49	2.75	15.86	4.24	1.49	81.63
2	70	1	303.21	14.1	16.6	47	18	48	25	1.7	6.94	0.99	1.97	0.76	55	1.29	144	26.5	37	9	110	0	0	0	2.75	15.86	4.24	1.49	81.63
1	70	0	330	18	21	84	26	72	35.1	1.2	5.77	1.23	2.9	1.25	116.3	1.43	170	28	60	8	138	1316.28	0.05	100.49	1.65	21.2	5.67	1.96	81.63
1	70	2	303.21	16	25	77	21	69	27.7	1.3	3.76	1.23	2.9	0.49	99	0.9	253.96	43.59	119.7	17.56	178.31	1316.28	0.05	100.49	2.75	15.86	4.24	1.49	81.63
2	70	2	303.21	36	29	64	33	86	34.8	1.2	5.2	1.23	2.9	1.68	403.4	1.13	201	37	134	15	196	19.5	0.01	33.1	2.75	15.86	4.24	1.49	81.63
1	70	3	303.21	12	17	74	14	43	19.8	2.1	5.68	1.23	2.9	0.8494	224.09	1.29	253.96	43.59	119.7	17.56	178.31	1316.28	0.05	100.49	2.75	15.86	4.24	1.49	81.63
1	70	0	452.9	13	22	73	17	82.51	27.4	1.5	4.86	1.23	2.9	0.9	224.09	1.29	253.96	43.59	119.7	17.56	178.31	37.5	0.01	40.06	2.75	15.86	4.24	1.49	81.63
2	70	1	303.21	30	30	75	20	101	26.9	1.6	5.5	1.23	2.9	1.26	46	1.7	253.96	43.59	119.7	17.56	178.31	1316.28	0.05	100.49	2.75	15.86	4.24	1.49	81.63
1	70	2	303.21	39	22	79	30.7	59	24.6	1.4	4.3	0.87	2.95	1.27	185	1.18	253.96	43.59	119.7	17.56	178.31	1316.28	0.05	100.49	2.75	15.86	4.24	1.49	81.63
2	70	2	118	14.5	16.6	67	11.4	59	22.7	1.8	5.15	1.38	3.78	1.31	736	1.53	137	25	68	11	109	1316.28	0.05	100.49	4.22	16.2	4.1	1.62	81.63
1	70	2	303.21	25.06	26.4	81.06	43	82.51	27.01	1.55	5.5	1.23	2.9	0.8494	224.09	1.29	253.96	43.59	119.7	17.56	178.31	1316.28	0.05	100.49	2.75	15.86	4.24	1.49	81.63
1	70	2	194	15	19	62	24.3	82.51	27.01	1.55	5.24	0.95	2.8	1.06	224.09	1.29	132	11	82	11	55	1316.28	0.05	100.49	1.67	15.7	5.03	1.87	81.63
1	70	1	303.21	18	23	87	30	82.51	27.01	1.55	5.87	1.14	2.18	0.85	224.09	1.29	253.96	43.59	119.7	17.56	178.31	1316.28	0.05	100.49	2.75	15.86	4.24	1.49	81.63
1	70	1	303.21	17	16	65	33	72	29.5	1.3	5.62	1.31	3.73	0.57	163	1.43	144	25	37	8	105	1316.28	0.05	100.49	2.06	17.5	4.78	1.83	81.63
2	70	1	224	17	17	64	20.4	71	27.3	1.6	5.7	1.35	3.07	1.01	7	1.49	253.96	43.59	119.7	17.56	178.31	1316.28	0.05	100.49	2.75	15.86	4.24	1.49	81.63
1	70	1	303.21	12	15	87	19	66	23.4	1.8	4.82	1.23	2.9	0.29	69	1.64	253.96	43.59	119.7	17.56	178.31	1316.28	0.05	100.49	2.75	15.86	4.24	1.49	81.63
2	70	1	303.21	19	20	51	27	82.51	27.01	1.55	5.42	1.52	3.01	0.98	224.09	1.29	188	36	78	8	142	1316.28	0.05	100.49	2.58	17.8	5.18	1.86	81.63
2	70	0	303.21	32	22	53	22	81	25.4	1.5	8.42	1.23	2.9	0.9	12.4	1.26	188	33	72	10	138	1316.28	0.05	100.49	2.75	15.86	4.24	1.49	36.63
2	70	0	303.21	24	23	61	82	47	30.4	1.1	5.12	0.81	3.14	0.81	104	1.03	224	40	38	7	175	1316.28	0.05	100.49	2.75	15.86	4.24	1.49	81.63
2	70	2	303.21	30	14	123	30	82.51	20.7	1.7	5.5	1.23	2.9	0.8494	224.09	1.29	253.96	43.59	119.7	17.56	178.31	1316.28	0.05	100.49	2.75	15.86	4.24	1.49	81.63
1	70	1	303.21	27.8	20.6	75	44.3	81	22.6	1.8	5.21	1.15	3.41	1.24	177	1.34	253.96	43.59	119.7	17.56	178.31	1316.28	0.05	100.49	2.75	15.86	4.24	1.49	81.63
1	70	0	303.21	14	18	82	10	69	24.5	1.4	5.07	0.93	3.4	1.09	35	1.22	253.96	43.59	119.7	17.56	178.31	1316.28	0.05	100.49	2.75	15.86	4.24	1.49	81.63
1	70	3	54.02	38	40	65	11	64	29.8	1	4.72	1.23	2.9	0.46	80.1	1.06	176	37	76	7	132	114.9	0.01	35.06	3.36	13.9	4.61	1.73	7.82
2	70	2	613.6	25.06	26.4	81.06	43	82.51	27.01	1.55	5.5	1.23	2.9	0.8494	224.09	1.29	253.96	43.59	119.7	17.56	178.31	1316.28	0.05	100.49	0.94	14.81	3.76	1.42	81.63
1	70	2	155.8	19	22	69	32	49	29.2	1.5	6.21	1.23	2.9	1.77	15.7	1.15	195	39	85	10	169	45.1	0.01	0	2.74	13.8	4.33	1.36	81.63
1	70	1	303.21	9	15	71	16	67	25.3	1.8	5.04	1.45	3.89	0.38	227	1.48	253.96	43.59	119.7	17.56	178.31	223.2	0.01	411.4	2.75	15.86	4.24	1.49	45.06
1	70	2	567	11	25	81	21	51	28	1.6	4.76	1.75	4.31	1.25	221	1.82	165	31	101	9	122	54.5	0.01	29.1	2.18	11.9	3.02	1.48	81.63
2	70	1	303.21	19	20	51	16	64	26.9	1.6	6.68	1.23	2.9	0.23	139	1.57	253.96	43.59	119.7	17.56	178.31	1316.28	0.05	100.49	2.75	15.86	4.24	1.49	81.63
2	70	1	303.21	12	19	69	11	54	25.8	1.5	4.02	1.23	2.9	0.93	56	1.41	253.96	43.59	119.7	17.56	178.31	1316.28	0.05	100.49	2.75	15.86	4.24	1.49	81.63
2	70	0	303.21	26	24	57	20	72	25.3	1.7	6.03	1.23	2.9	1.68	35.3	1.45	187	29	49	7	140	1316.28	0.05	100.49	2.75	15.86	4.24	1.49	81.63
2	70	3	303.21	15	22	58	8	42	18.6	2	6.1	1.23	2.9	0.8494	224.09	1.29	253.96	43.59	119.7	17.56	178.31	1316.28	0.05	100.49	2.75	15.86	4.24	1.49	81.63
1	70	0	303.21	18	14.2	80	31.5	59	25.4	1.5	5.4	1.09	3.03	1.35	101	1.44	100	22.1	38	7	83	14.8	0.01	23.33	1.24	14.2	4.65	1.48	2.5
2	70	1	168	28.3	24.3	48	21.6	65	22.9	1.8	6.43	1.42	2.95	0.88	344	1.68	170	35.9	51	10	137	63.2	0.01	21.93	1.15	11.1	4.56	1.49	2.02
2	70	2	248	23	20	71	15	42	27.8	1.4	4.53	1.18	4.38	1.26	240	1.37	164	32	59	7	127	68.9	0.01	40.53	2.86	13.6	4.01	1.69	81.63
2	70	1	303.21	27	27	68	22	82.51	27.01	1.55	5.88	1.23	2.9	1.34	224.09	1.29	253.96	43.59	119.7	17.56	178.31	1316.28	0.05	100.49	2.75	15.86	4.24	1.49	81.63
1	70	0	303.21	25.06	26.4	81.06	43	82.51	27.01	1.55	5.78	1.23	2.9	1.73	224.09	1.29	253.96	43.59	119.7	17.56	178.31	1316.28	0.05	100.49	2.75	15.86	4.24	1.49	81.63
2	70	2	270.7	23	17	57	26	97	26.5	1.7	4.68	1.23	2.9	1.31	18	1.21	130	31	86	8	110	26.3	0.01	25.78	2.75	15.86	4.24	1.49	2.15
1	70	2	0	26.3	45	143	221.2	165	21.4	1.5	6.85	0.73	2.67	0.55	205	0.77	373	68.2	201	16	288	6906	0.11	0	0.9	13	4.58	1.57	122.4
2	70	0	303.21	13.6	20	49	43	82.51	27.01	1.55	8.87	1.23	2.9	0.8494	224.09	1.29	174	30.8	81	12	137	1316.28	0.05	100.49	2.75	15.86	4.24	1.49	81.63
2	70	2	303.21	25.06	26.4	81.06	43	82.51	27.01	1.55	5.5	1.23	2.9	0.8494	224.09	1.29	253.96	43.59	119.7	17.56	178.31	1316.28	0.05	100.49	2.75	15.86	4.24	1.49	81.63
1	70	1	303.21	31	28	63	87	56	28.4	1.6	5.57	1.45	1.78	0.53	46	1.64	253.96	43.59	119.7	17.56	178.31	1316.28	0.05	100.49	2.75	15.86	4.24	1.49	81.63
1	70	0	231	17.6	20	25	235.5	79	27.1	1.2	5.82	0.91	2.46	0.71	614	1.03	253.96	43.59	119.7	17.56	178.31	149.2	0.01	22.1	1.5	9.9	1.93	0.69	10.66
2	70	1	205	25	25	62	42	66	29.3	1.4	5.51	1.23	2.9	1.64	275.2	1.56	253.96	43.59	119.7	17.56	178.31	1316.28	0.05	100.49	2.75	15.86	4.24	1.49	81.63
2	69	1	303.21	25.06	26.4	81.06	43	82.51	27.01	1.55	5.5	1.23	2.9	0.8494	224.09	1.29	253.96	43.59	119.7	17.56	178.31	1316.28	0.05	100.49	4.19	16.17	4.4	1.34	81.63
1	69	0	303.21	13.9	23.1	99	20	57	29.6	1.6	5.53	1.65	3.57	0.54	240	1.77	148	27.5	184	7.6	120	1316.28	0.05	100.49	2.75	15.86	4.24	1.49	81.63
2	69	0	303.21	16	21.5	47	19.7	82.51	27.01	1.55	5.28	1.52	2.45	0.65	224.09	1.29	253.96	43.59	119.7	17.56	178.31	1316.28	0.05	100.49	2.75	15.86	4.24	1.49	81.63
2	69	2	126	22	26	53	23	63	22.5	2.1	5.5	1.81	1.31	0.21	336	1.85	180	40	176	41	141	26.4	0	34.51	1.4	16	4.99	1.93	81.63
2	69	2	31.7	10	19	53	16	61	33.7	1.2	4.83	1.23	2.9	0.61	82.6	1.88	189	35	50	11	163	261.7	0.01	22.96	2.29	12.7	4.81	1.84	81.63
1	69	1	412	41	29	74	39	55	23.3	1.6	4.42	1.67	3.38	0.72	750	1.77	188	35	46	12	146	186	0.01	40.44	5.83	12.3	3.74	1.39	3.24
1	69	2	303.21	20.2	17.9	67	19.4	82.51	27.01	1.55	7.06	1.06	2.07	0.72	224.09	1.29	165	29.3	108	8.4	129	1316.28	0.05	100.49	2.75	15.86	4.24	1.49	81.63
2	69	1	143.8	20	17	56	11.4	73	28.9	1.5	6.46	1.34	1.62	0.52	67	1.62	206	24.1	70	11	157	1316.28	0.05	100.49	2.01	14.39	4.89	1.65	81.63
1	69	2	303.21	13.8	17.1	68	11.6	39	25.5	1.9	4.68	1.68	1.41	0.53	229	1.61	143	26.2	58	7.7	107	1316.28	0.05	100.49	2.31	19.4	5.87	1.71	81.63
2	69	3	303.21	10	20	64	11	60	24.1	1.6	5.15	1.58	3.71	0.77	488	1.68	253.96	43.59	119.7	17.56	178.31	1316.28	0.05	100.49	2.75	15.86	4.24	1.49	81.63
2	69	0	303.21	30	32	44	56	91	32.7	1.2	6.22	1.23	2.63	0.56	136	1.32	233	28	54	12	156	1316.28	0.05	100.49	2.75	15.86	4.24	1.49	81.63
2	69	0	63.8	15	35	29	110	88	21.2	1.5	4.99	1.23	2.9	0.51	201	1.86	253.96	43.59	119.7	17.56	178.31	686.2	0.11	35.86	1.2	16.5	3.18	1.49	28.33
2	69	0	303.21	19	25	58	21.7	106	25.5	1.9	5.48	1.14	2.02	0.75	47	1.39	198	34.9	76	13	152	1316.28	0.05	100.49	2.75	15.86	4.24	1.49	81.63
2	69	0	222.1	14	19	64	14	73	25	1.7	4.47	1.23	2.9	1.42	307.4	1.54	253.96	43.59	119.7	17.56	178.31	54.6	0.01	23.2	1.87	17.7	4.19	1.66	81.63
1	69	1	303.21	25.06	26.4	81.06	43	82.51	27.01	1.55	5.5	1.23	2.9	0.8494	224.09	1.29	253.96	43.59	119.7	17.56	178.31	1316.28	0.05	100.49	2.75	15.86	4.24	1.49	81.63
2	69	0	303.21	27	32	66	43	82.51	27.01	1.55	5.5	1.23	2.9	0.8494	224.09	1.29	223	34	152	13	168	47.7	0	31.26	2.75	15.86	4.24	1.49	81.63
2	69	2	224	7	18	56	17.5	68	30	1.4	5.74	1.69	2.67	0.64	101	1.87	180	32	62	10.4	131	1316.28	0.05	100.49	3.27	13.6	4.76	1.49	81.63
2	69	2	303.21	13	18	63	14	82.51	27.01	1.55	5.25	0.91	2.14	0.49	224.09	1.29	253.96	43.59	119.7	17.56	178.31	1316.28	0.05	100.49	2.75	15.86	4.24	1.49	81.63
1	69	0	303.21	25.06	26.4	81.06	43	82.51	27.01	1.55	5.5	1.23	2.9	0.8494	224.09	1.29	253.96	43.59	119.7	17.56	178.31	1316.28	0.05	100.49	2.75	15.86	4.24	1.49	81.63
2	69	0	303.21	18	25	52	14	55	26.9	1.6	5.2	1.23	2.9	0.55	69	2.08	253.96	43.59	119.7	17.56	178.31	1316.28	0.05	100.49	1.8	14.7	4.68	1.44	81.63
2	69	0	109.2	19	20	66	32	69	27.1	1.7	5.34	1.23	2.9	0.8494	116.8	1.5	176	30	74	9	161	12.6	0	23.34	4.53	16.21	5.05	1.96	81.63
1	69	0	303.21	17.6	22.8	130	15.6	82.51	27.01	1.55	4.69	0.67	2.58	1	224.09	1.29	130	23.7	84	8	103	1316.28	0.05	100.49	2.75	15.86	4.24	1.49	81.63
1	69	2	38.04	10	10	59	11	64	20.4	1.5	4.85	1.23	2.9	0.74	72.8	0.81	134	26	58	8	117	126.5	0.01	0	0.88	15.18	5.14	1.72	9.22
1	69	2	303.21	16	20	81	16	82.51	27.01	1.55	4.73	0.87	2.45	0.53	224.09	1.29	253.96	43.59	119.7	17.56	178.31	1316.28	0.05	100.49	2.75	15.86	4.24	1.49	81.63
1	69	0	12.7	15	20	53	12	68	17.9	2	4.88	1.23	2.9	1.38	175.2	1.73	173	36	103	15	129	136.1	0.01	29.95	2.38	12.34	4.29	1.61	7.93
1	69	1	303.21	24	33	71	25	57	28.5	1.6	5.16	1.02	1.61	0.28	87	1.27	253.96	43.59	119.7	17.56	178.31	1316.28	0.05	100.49	2.75	15.86	4.24	1.49	81.63
2	69	2	303.21	15.8	22.3	54	18.2	82.51	27.01	1.55	5.42	1.09	3.34	0.69	224.09	1.29	253.96	43.59	119.7	17.56	178.31	1316.28	0.05	100.49	2.75	15.86	4.24	1.49	81.63
1	69	2	303.21	26	21	77	21	67	25.9	1.4	4.74	1.05	3.65	1.13	198	1.21	253.96	43.59	119.7	17.56	178.31	1316.28	0.05	100.49	2.75	15.86	4.24	1.49	81.63
2	69	0	303.21	16.1	16.5	72	41.6	76	27.7	1.5	4.9	1.53	2.83	0.59	169	1.56	253.96	43.59	119.7	17.56	178.31	1316.28	0.05	100.49	2.75	15.86	4.24	1.49	81.63
2	69	1	303.21	25.06	26.4	81.06	43	82.51	27.01	1.55	6.81	1.23	2.9	0.8494	224.09	1.29	253.96	43.59	119.7	17.56	178.31	1316.28	0.05	100.49	2.75	15.86	4.24	1.49	81.63
2	69	3	303.21	36.5	40.2	59	42.5	82.51	27.01	1.55	6.08	0.79	3.39	0.83	224.09	1.29	253.96	43.59	119.7	17.56	178.31	1316.28	0.05	100.49	2.75	15.86	4.24	1.49	81.63
2	69	0	303.21	21.2	31.1	55	15	54	26.3	1.6	5.27	1.21	3.82	1.01	92	1.28	253.96	43.59	119.7	17.56	178.31	1316.28	0.05	100.49	2.75	15.86	4.24	1.49	81.63
2	69	2	303.21	24	29	73	21	82.51	27.01	1.55	6.26	1.23	2.9	1.71	224.09	1.29	253.96	43.59	119.7	17.56	178.31	1316.28	0.05	100.49	2.75	15.86	4.24	1.49	81.63
1	69	1	303.21	18	25	85	17	64	27.8	1.5	4.65	0.8	3.33	0.79	321	1.01	253.96	43.59	119.7	17.56	178.31	1316.28	0.05	100.49	2.75	15.86	4.24	1.49	81.63
1	69	1	506.5	36	18	73	50	58	20.7	1.8	7.03	1.23	2.9	1.09	72.9	1.33	161	31	163	17	118	320.6	0.01	55.58	0.98	16.79	2.64	0.69	45.08
2	69	0	303.21	11	32	53	176	82.51	31.8	1	4.42	1.23	2.9	0.8494	224.09	1.29	253.96	43.59	119.7	17.56	178.31	132.6	0.01	0	1.7	15.8	3.96	1.59	81.63
2	69	1	455	12	14	48	53	86	33.6	1.1	4.73	1.21	2.91	0.35	159	1.35	217	44	32	10	170	85.3	0.01	0	0.8	15.2	3.9	1.26	29.76
2	69	1	303.21	25.06	26.4	81.06	43	82.51	27.01	1.55	5.5	1.23	2.9	0.8494	224.09	1.29	253.96	43.59	119.7	17.56	178.31	1316.28	0.05	100.49	2.75	15.86	4.24	1.49	81.63
2	69	0	303.21	27	20.8	80	20.4	74	26.8	1.4	4.62	0.97	3.25	1.19	94	1.26	253.96	43.59	119.7	17.56	178.31	1316.28	0.05	100.49	2.75	15.86	4.24	1.49	81.63
2	69	2	303.21	25.06	26.4	81.06	43	82.51	27.01	1.55	5.5	1.23	2.9	0.8494	224.09	1.29	253.96	43.59	119.7	17.56	178.31	1316.28	0.05	100.49	2.75	15.86	4.24	1.49	81.63
2	68	3	465.3	27	24	53	16	42	27.3	1.8	5.73	1.16	2.17	0.77	61.7	1.23	167	42	320	13	125	1316.28	0.05	100.49	0.32	17.6	5.3	1.8	81.63
2	68	2	93.4	13	14	58	12	48	23.7	1.4	5.17	1.16	1.89	0.37	28	1.17	207	33	60	7	185	182.7	0.01	30.75	0.48	14.7	2.91	1.09	2.17
2	68	2	303.21	25.06	26.4	81.06	43	82.51	27.01	1.55	5.5	1.23	2.9	0.8494	224.09	1.29	253.96	43.59	119.7	17.56	178.31	1316.28	0.05	100.49	2.75	15.86	4.24	1.49	81.63
1	68	0	303.21	21	18	72	27.4	77	31.5	1.5	5.46	1.31	3.18	1.45	111	1.63	253.96	43.59	119.7	17.56	178.31	1316.28	0.05	100.49	2.75	15.86	4.24	1.49	81.63
1	68	3	303.21	21.3	25.2	79	16	58	23.3	1.9	6.07	1.88	2.58	0.54	319	1.86	243	57.2	235	27	203	1316.28	0.05	100.49	3.59	13.6	5.13	1.57	81.63
2	68	2	303.21	31.6	29.4	70	12.5	76	25.3	1.9	5.25	1.36	3.13	1.39	7	1.52	191	28	74	11	129	1316.28	0.05	100.49	2.75	15.86	4.24	1.49	81.63
2	68	1	379	11	17	53	19	43	30.4	1.4	6.05	1.11	2.72	0.26	86	1.15	253.96	43.59	119.7	17.56	178.31	147.1	0.01	0	0.3	14.9	3.23	1.05	7.55
1	68	1	303.21	16.3	16.8	66	16.2	49	22.2	1.5	4.95	1.23	2.9	0.8494	224.09	1.29	144	26.2	99	7.7	109	260.1	0.01	55.01	2.75	15.86	4.24	1.49	81.63
1	68	1	28.96	9	10	67	19	50	18.9	1.9	6.6	1.23	2.9	0.33	56.4	1.9	230	31	34	9	145	88.7	0.01	86.31	0.9	17.87	5.94	2.26	3.12
2	68	2	108	12.3	20	49	22.8	110	24.8	1.8	6.01	1.02	2.23	0.83	125	1.3	253.96	43.59	119.7	17.56	178.31	56	0	0	0.9	12.7	5.66	2.09	81.63
2	68	2	453.55	15	20	177	89	109	32.2	1.2	3.5	1.23	2.9	0.8494	224.09	1.29	202	41	79	10	160	0	0.07	219	2.75	15.86	4.24	1.49	81.63
2	68	1	303.21	14	19	77	14	91	20.6	2.3	4.56	1.23	2.9	1.22	23.5	1.11	253.96	43.59	119.7	17.56	178.31	1316.28	0.05	100.49	2.75	15.86	4.24	1.49	81.63
2	68	3	303.21	12	22	46	22	94	33.3	1.3	7.18	1.61	3.39	0.53	500	1.66	253.96	43.59	119.7	17.56	178.31	1316.28	0.05	100.49	2.75	15.86	4.24	1.49	81.63
2	68	2	303.21	18	20	44	24	82.51	27.01	1.55	4.72	1.23	2.9	0.65	224.09	1.29	253.96	43.59	119.7	17.56	178.31	1316.28	0.05	100.49	2.75	15.86	4.24	1.49	81.63
2	68	2	287	11	23	43	25	57	29.2	1.3	5.95	0.87	3.41	0.64	504.5	0.98	199	43	17	1	194	219.2	0.01	0	0.6	19.5	3.54	1.31	7.33
2	68	2	303.21	15	14	57	22	82.51	27.01	1.55	5.37	0.93	3.53	0.74	224.09	1.29	253.96	43.59	119.7	17.56	178.31	1316.28	0.05	100.49	2.75	15.86	4.24	1.49	81.63
1	68	2	358	123	76	82	242	79	29	1.4	6.43	1.23	2.9	1.38	102.5	1.81	184	35	87	9	137	1316.28	0.05	100.49	1.15	14.7	4.32	1.55	54.29
1	68	3	303.21	11.1	17.4	67	24.8	37	24.4	1.7	4.8	1.46	2.7	0.67	708	1.42	253.96	43.59	119.7	17.56	178.31	1316.28	0.05	100.49	2.75	15.86	4.24	1.49	81.63
1	68	2	303.21	45	37	70	28	73	23.7	1.8	4.65	1.21	2.6	0.35	125	1.4	253.96	43.59	119.7	17.56	178.31	1316.28	0.05	100.49	2.75	15.86	4.24	1.49	81.63
1	68	2	303.21	35	26	59	23.5	84	20.3	1.7	6.56	1.09	2.8	0.69	136	1.47	138	22.2	276	8	97	68.6	0.01	147.6	2.75	15.86	4.24	1.49	33.7
2	68	1	303.21	16	18	41	21	64	28.8	1.2	5.5	0.94	2.94	0.76	242	1.09	191	28	49	12	140	1316.28	0.05	100.49	2.75	15.86	4.24	1.49	81.63
2	68	2	303.21	29	22	65	86	89	30.3	1.3	5.96	0.98	3.6	0.9	417	1.17	215	36	50	7	158	1316.28	0.05	100.49	2.75	15.86	4.24	1.49	81.63
1	68	3	303.21	35.9	32.2	71	136.5	70	23.6	1.6	4.72	1.3	2.08	0.66	528	1.5	253.96	43.59	119.7	17.56	178.31	1316.28	0.05	100.49	2.75	15.86	4.24	1.49	81.63
2	68	1	303.21	25.06	26.4	81.06	43	82.51	27.01	1.55	5.5	1.23	2.9	0.8494	224.09	1.29	253.96	43.59	119.7	17.56	178.31	133	0.01	54.29	2.75	15.86	4.24	1.49	292.4
1	68	3	303.21	11	13	56	13	55	26.2	1.5	4.59	0.68	2.29	0.56	465	0.82	224	41	105	7	166	1316.28	0.05	100.49	2.75	15.86	4.24	1.49	81.63
1	68	0	303.21	17.5	21.3	72	13.8	64	32.6	1.2	5.21	0.88	3.8	1.12	393	0.93	253.96	43.59	119.7	17.56	178.31	1316.28	0.05	100.49	2.75	15.86	4.24	1.49	81.63
1	68	2	303.21	16	16	73	13	59	22.4	1.7	4.96	0.96	2.83	0.73	128	1.2	253.96	43.59	119.7	17.56	178.31	1316.28	0.05	100.49	2.75	15.86	4.24	1.49	81.63
2	68	2	303.21	25.06	26.4	81.06	43	82.51	27.01	1.55	5.5	1.23	2.9	0.8494	224.09	1.29	253.96	43.59	119.7	17.56	178.31	1316.28	0.05	100.49	2.75	15.86	4.24	1.49	81.63
2	68	1	878	76	39	59	41	80	27.8	1.5	5.58	0.83	3.29	1.28	399	1.3	202	27	48	8	140	10.5	0.01	30.35	1.56	11.4	4.55	2.07	81.63
2	68	0	400	8	24	70	48	85	36.3	0.8	4.55	1.05	1.62	0.22	257	1.14	148	23	36	30	95	708	0.03	44.32	2.4	18.8	3.16	1.18	48.99
2	68	0	431	13.7	20.9	48	23.9	65	24.3	1.6	4.88	0.89	3.74	1.08	159	1.02	258	45.8	44	19	197	72.6	0.02	23.75	7.54	18.2	4.06	2.18	81.63
1	68	3	303.21	51	32	73	81	89	26	1.3	4.84	0.67	2.76	0.8	87	0.86	160	32	47	8	136	1316.28	0.05	100.49	2.75	15.86	4.24	1.49	81.63
1	68	0	1140	21	29	69	27	62	22.5	1.7	4.72	1.23	2.9	0.8494	246.7	0.9	190	29	152	10	161	214.3	0.01	61.17	2.75	15.86	4.24	1.49	81.63
2	68	1	303.21	11.9	25.6	78	14.3	50	27.5	1.6	4.91	1.64	2.15	0.54	56	1.68	253.96	43.59	119.7	17.56	178.31	1316.28	0.05	100.49	2.75	15.86	4.24	1.49	81.63
2	68	1	303.21	25.06	26.4	81.06	43	82.51	27.01	1.55	5.5	1.23	2.9	0.8494	224.09	1.29	253.96	43.59	119.7	17.56	178.31	1316.28	0.05	100.49	2.75	15.86	4.24	1.49	81.63
1	68	2	303.21	24	36	67	19.3	60	28.3	1.3	3.81	0.95	1.81	0.38	225	1.14	182	30	214	18	125	134	0.01	375.1	2.75	15.86	4.24	1.49	69.46
1	68	2	303.21	22.7	19.7	58	18.6	82.51	27.01	1.55	6.04	0.96	2.38	0.71	224.09	1.29	253.96	43.59	119.7	17.56	178.31	1316.28	0.05	100.49	2.75	15.86	4.24	1.49	81.63
1	68	1	153	22	17	98	30	78	34.5	1.3	5.53	1.23	2.9	1.48	83	1.43	202	36	131	9	180	21.2	0	64.91	2.43	11.5	4.26	1.47	11.29
1	68	1	727.8	12	19	55	31	53	38.4	0.9	4.57	1.23	2.9	0.76	444.7	0.97	133	25	31	5	107	434.3	0.01	0	1.41	15.17	2.82	1.12	171.6
1	68	3	303.21	22	26	83	16.6	83	23.7	1.9	5.04	1.02	1.7	0.47	158	1.28	253.96	43.59	119.7	17.56	178.31	1316.28	0.05	100.49	2.75	15.86	4.24	1.49	81.63
2	68	1	404	14	13	50	13	45	20.6	1.6	4.94	0.62	1.67	0.31	51	0.89	127	24	35	10	121	95.9	0	34.97	1.1	20.2	2.85	1.24	8.24
2	68	1	303.21	14.6	22.5	59	9.6	41	22.4	1.9	4.83	1.58	2.56	0.6	170	1.66	169	39.5	134	9.5	144	106.8	0	25.59	3.54	16.5	3.71	1.38	81.63
2	68	2	303.21	43	37	62	79	82.51	27.01	1.55	5.1	1.42	2.69	0.83	224.09	1.29	182	29	98	7	136	1316.28	0.05	100.49	2.75	15.86	4.24	1.49	81.63
2	68	0	303.21	9	12	61	22	82.51	27.01	1.55	7.23	0.76	2.11	0.37	224.09	1.29	253.96	43.59	119.7	17.56	178.31	1316.28	0.05	100.49	2.75	15.86	4.24	1.49	81.63
2	67	1	77.9	21.4	20.5	66	31.6	79	19.2	2.2	5.07	1.59	2.51	0.91	519	1.79	184	36.2	60	9.9	143	71.2	0.01	25.3	2.21	14.1	4.43	1.82	81.63
2	67	3	303.21	17	19	46	17	66	27.2	1.6	5.07	1.23	2.9	1.62	103	1.39	253.96	43.59	119.7	17.56	178.31	252.3	0.01	0	2.75	15.86	4.24	1.49	81.63
2	67	2	303.21	23	32	81.06	18	82.51	26.4	1.6	4.94	1.23	2.9	0.36	224.09	1.29	253.96	43.59	145	17.56	178.31	1316.28	0.05	100.49	2.75	15.86	4.24	1.49	81.63
2	67	2	117	11	17	54	12	57	19.3	2	4.5	1.23	2.9	0.66	25	1.43	189	36	70	8	158	124.2	0.01	0	1.02	13.2	4.3	1.38	81.63
1	67	1	303.21	38.5	28.7	85	55.4	42	27.5	1.7	6.93	1.22	2.07	0.91	11	1.45	253.96	43.59	119.7	17.56	178.31	1316.28	0.05	100.49	2.75	15.86	4.24	1.49	81.63
1	67	1	721	19	19	58	21	66	22.9	1.8	4.89	1.3	2.1	0.59	31	1.57	117	23	36	12	87	18.6	0.01	0	1.53	15.7	4.52	1.3	81.63
1	67	2	225	18.8	17.7	60	29.4	67	29.1	1.5	5.11	1.05	2.75	1.1	33	1.45	177	31	87	3	133	1316.28	0.05	100.49	2.75	15.86	4.24	1.49	81.63
1	67	1	303.21	13.2	17	75	15.1	56	19.8	2	4.77	1.54	2.27	0.53	128	1.57	253.96	43.59	119.7	17.56	178.31	1316.28	0.05	100.49	2.75	15.86	4.24	1.49	81.63
2	67	1	303.21	13	18	70	22	46	19.7	2.2	5.11	1.23	2.9	0.8	660.8	1.24	253.96	43.59	119.7	17.56	178.31	1316.28	0.05	100.49	2.75	15.86	4.24	1.49	81.63
2	67	1	303.21	25.06	26.4	81.06	43	82.51	27.01	1.55	5.5	1.23	2.9	0.8494	224.09	1.29	253.96	43.59	119.7	17.56	178.31	1316.28	0.05	100.49	2.75	15.86	4.24	1.49	81.63
2	67	2	32.5	12	12	66	21	96	25	1.5	4.59	1.49	3.33	0.55	485	1.53	157	32	29	8	118	24.8	0.01	0	2.75	15.86	4.24	1.49	81.63
2	67	1	46.76	9	15	35	15	74	20.1	2.1	9.51	1.23	2.9	0.89	247.8	1.07	117	24	28	11	95	189.7	0.01	0	1.02	16.09	3.89	1.56	81.63
1	67	0	103	39	20	65	20	56	22	1.7	5.73	0.85	2.14	0.55	111	1.02	137	24	72	10	105	41.7	0.01	29.11	1.53	14.1	4.29	1.49	81.63
2	67	0	83.94	18	15	67	16	80	19.4	2	5.22	1.23	2.9	1.27	70.5	1.43	145	29	45	7	133	70.3	0.01	0	1.41	17.72	4.02	1.24	81.63
2	67	1	251.4	38	49	76	61	78	27.5	1.7	5.5	1.23	2.9	0.93	46.8	1.42	206	30	138	10	135	1316.28	0.05	100.49	3.59	16.99	4.82	1.64	81.63
2	67	2	303.21	16	21	63	17	63	32.8	1.3	6	1.23	2.9	0.8494	60.7	1.1	253.96	43.59	119.7	17.56	178.31	1316.28	0.05	100.49	2.75	15.86	4.24	1.49	81.63
1	67	1	40.6	12	16	70	33	96	29.6	1.4	4.04	1.23	2.9	1.19	29	1.46	253.96	43.59	119.7	17.56	178.31	99.4	0.01	0	0.79	17	5.88	1.87	8.26
1	67	0	303.21	13	15	98	19	82.51	27.01	1.55	7.47	1.23	2.9	0.89	224.09	1.29	253.96	43.59	119.7	17.56	178.31	1316.28	0.05	100.49	2.75	15.86	4.24	1.49	81.63
1	67	1	183	23	28	55	164	66	25.3	1.7	6.05	1.17	3.73	1.59	73	1.39	253.96	43.59	119.7	17.56	178.31	53.2	0.01	33.23	0.48	15.5	4.87	2	68.99
1	67	0	303.21	51.3	33.4	64	75.9	91	19.4	2	5.74	0.92	2.14	0.8	69	1.14	253.96	43.59	119.7	17.56	178.31	1316.28	0.05	100.49	2.75	15.86	4.24	1.49	81.63
1	67	2	303.21	15.9	17.6	73	33.2	82.51	27.01	1.55	5.88	1.23	2.9	0.8494	224.09	1.29	253.96	43.59	119.7	17.56	178.31	1316.28	0.05	100.49	2.75	15.86	4.24	1.49	81.63
1	67	2	303.21	22	27	96	29	59	24.9	1.7	4.77	0.94	2.47	0.91	107	1.33	253.96	43.59	119.7	17.56	178.31	1316.28	0.05	100.49	2.75	15.86	4.24	1.49	81.63
2	67	0	303.21	25.06	26.4	81.06	43	82.51	27.01	1.55	5.5	1.23	2.9	0.8494	224.09	1.29	253.96	43.59	119.7	17.56	178.31	1316.28	0.05	100.49	2.75	15.86	4.24	1.49	81.63
2	67	0	303.21	9	19	52	10.6	96	30.9	1.4	4.94	1.34	3.39	1.24	96	1.51	253.96	43.59	119.7	17.56	178.31	1316.28	0.05	100.49	2.75	15.86	4.24	1.49	81.63
1	67	2	303.21	10	16	73	15	77	26.5	1.5	4.83	0.84	3.23	0.7	402	1.12	253.96	43.59	119.7	17.56	178.31	1316.28	0.05	100.49	2.75	15.86	4.24	1.49	81.63
1	67	3	303.21	34	27	79	35	54	31.5	1.6	5.18	0.92	3.93	1.01	135	1.18	253.96	43.59	119.7	17.56	178.31	1316.28	0.05	100.49	2.75	15.86	4.24	1.49	81.63
2	67	1	303.21	13.7	16.4	50	11.6	62	30.8	1.3	4.5	1.05	2.38	1.07	55	1.32	253.96	43.59	119.7	17.56	178.31	1316.28	0.05	100.49	2.75	15.86	4.24	1.49	81.63
1	67	2	303.21	14.9	26	77	17.5	56	21.7	1.7	5.01	0.79	2.11	0.75	214	0.99	167	31.6	242	12	130	1316.28	0.05	100.49	2.75	15.86	4.24	1.49	12.09
2	67	0	277	42	54	54	126	300	24.6	1.3	7.76	0.99	3.46	0.87	48.7	0.9	253.96	43.59	119.7	17.56	178.31	151.2	0.01	0	4.77	16.8	4.12	1.83	13.89
1	67	1	303.21	22	17	61	19	39	23	1.7	5.01	1.07	2.61	0.69	235	1.31	253.96	43.59	119.7	17.56	178.31	1316.28	0.05	100.49	2.75	15.86	4.24	1.49	81.63
2	67	1	303.21	20	19	61	22	52	28.6	1.4	5.58	1.27	3.18	0.43	65	1.34	253.96	43.59	119.7	17.56	178.31	68.2	0.01	21.08	2.75	15.86	4.24	1.49	81.63
2	67	2	664.81	22	20	43	39	72	26.8	1.3	5.36	1.23	2.9	0.58	192.4	1.71	275	63	74	10	232	40.4	0.01	0	1.69	21.06	3.68	1.2	7.79
2	67	0	303.21	43	35	45	45.3	82.51	27.01	1.55	5.44	1.14	3.5	0.67	224.09	1.29	253.96	43.59	119.7	17.56	178.31	1316.28	0.05	100.49	2.75	15.86	4.24	1.49	81.63
1	67	1	303.21	13	22	61	15	54	23.6	1.7	4.26	1.23	2.9	0.33	247	1.77	253.96	43.59	119.7	17.56	178.31	1316.28	0.05	100.49	2.75	15.86	4.24	1.49	81.63
1	67	0	303.21	35	18	69	37	48	29.3	1.5	5.38	0.86	3.24	0.84	172	1.11	253.96	43.59	119.7	17.56	178.31	1316.28	0.05	100.49	2.75	15.86	4.24	1.49	81.63
1	67	0	303.21	13.4	18.3	70	13.3	47	28.9	1.3	4.71	0.97	1.68	0.49	135	1.08	253.96	43.59	119.7	17.56	178.31	1316.28	0.05	100.49	2.75	15.86	4.24	1.49	81.63
1	66	0	1062	48	69	54	298	100	18.8	1.6	6.04	1.23	2.9	1.12	45.9	1.59	198	30	52	7	141	104.5	0.01	0	0.63	14.11	4.53	1.61	2.13
2	66	1	303.21	14	18	58	15	101	37.9	1.1	5.25	1.57	4.08	0.63	134	1.64	253.96	43.59	119.7	17.56	178.31	1316.28	0.05	100.49	2.75	15.86	4.24	1.49	81.63
1	66	0	303.21	19	15	58	20	83	33.3	1	4.64	0.88	2.77	0.55	566	0.99	253.96	43.59	119.7	17.56	178.31	1316.28	0.05	100.49	2.75	15.86	4.24	1.49	81.63
2	66	2	303.21	14	14	50	18	57	27.9	1.6	5.32	1.23	2.9	0.8494	70.2	1.6	153	30	83	9	146	1316.28	0.05	100.49	1.84	16.8	5.32	1.6	81.63
1	66	0	372.6	13	17	80	17	61	25.4	1.9	6.23	1.23	2.9	0.81	44.8	1.5	129	22	53	9	103	13.1	0.01	0	0.83	16.99	4.95	1.93	81.63
2	66	1	303.21	24	12	53	26	63	24.3	1.8	5.63	1.23	2.9	0.63	27.9	1.16	166	30	94	8	124	1316.28	0.05	100.49	2.75	15.86	4.24	1.49	81.63
1	66	1	277.9	23	18	62	39	45	22.7	1.9	5.11	1.23	2.9	0.8494	120.5	1.1	146	34	172	13	161	1316.28	0.05	100.49	1.77	14.22	5.15	1.66	81.63
1	66	3	22.56	9	12	72	14	70	25.8	1.5	5.26	1.23	2.9	0.8494	224.09	1.29	253.96	43.59	119.7	17.56	178.31	1316.28	0.05	100.49	2.75	15.86	4.24	1.49	81.63
2	66	1	96.39	18	26	65	20	63	24.9	1.8	5.61	1.23	2.9	0.66	435.7	1.72	253.96	43.59	119.7	17.56	178.31	1316.28	0.05	100.49	1.18	16.1	3.92	1.54	81.63
2	66	2	139	9	16	42	17	77	21.9	1.9	6.02	1.23	2.9	0.42	61	1.55	207	28	47	9	133	62.8	0	0	0.78	16.6	3.73	1.18	81.63
2	66	2	303.21	20.9	22.5	71	13.1	68	33.8	1.3	6.48	1.26	2.2	0.77	480	1.57	150	28.3	81	9.9	116	1316.28	0.05	100.49	4.3	12.8	4.38	1.63	81.63
1	66	2	163	23.4	24.7	60	59.1	72	25.8	1.6	4.71	1.68	3.02	0.46	409	1.69	160	29.1	43	8	123	63.3	0.01	38.11	1.66	17.6	4.59	1.79	7.93
1	66	0	303.21	21	21	78	61	54	24.5	1.9	4.52	1.23	2.9	1.4	292.1	1.11	170	31	74	8	125	1316.28	0.05	100.49	5.3	15.3	5.01	1.49	81.63
2	66	2	201	65	49	68	36	81	27.7	1.6	5.87	1.23	2.9	0.76	540	1.59	206	30	61	10	160	1316.28	0.05	100.49	2.75	15.86	4.24	1.49	81.63
2	66	0	303.21	14	44	58	45	97	31.2	1.4	5.24	1.24	3.37	1.07	227	1.49	253.96	43.59	119.7	17.56	178.31	1316.28	0.05	100.49	2.75	15.86	4.24	1.49	81.63
2	66	1	303.21	6	17	67	12	82.51	27.01	1.55	5.21	1.23	2.9	0.75	224.09	1.29	253.96	43.59	119.7	17.56	178.31	1316.28	0.05	100.49	2.75	15.86	4.24	1.49	81.63
2	66	0	303.21	13	20	73	17	82.51	27.01	1.55	7.93	1.23	2.9	1.28	224.09	1.29	276	40	151	9	203	1316.28	0.05	100.49	2.75	15.86	4.24	1.49	81.63
2	66	2	303.21	31	28	44	30	82.51	30.3	1.5	6.08	1.23	2.9	0.8494	224.09	1.29	253.96	43.59	119.7	17.56	178.31	1316.28	0.05	100.49	2.75	15.86	4.24	1.49	81.63
1	66	1	120.2	18	17	83	26	49	25	1.8	5.44	1.23	2.9	0.77	27.3	1.06	126	27	108	8	102	1316.28	0.05	100.49	1.19	16.14	4.88	1.58	81.63
1	66	0	303.21	10.1	19	76	18.8	63	20	1.9	5.06	1.09	2.65	0.7	171	1.27	253.96	43.59	119.7	17.56	178.31	1316.28	0.05	100.49	2.75	15.86	4.24	1.49	81.63
2	66	2	303.21	25.06	26.4	81.06	43	82.51	27.01	1.55	5.5	1.23	2.9	0.8494	224.09	1.29	253.96	43.59	119.7	17.56	178.31	1316.28	0.05	100.49	1.04	13.5	4.65	1.66	81.63
2	66	2	199.1	8	12	51	33	51	29.2	1.2	7.52	1.23	2.9	1.13	184	1.04	171	31	23	18	132	141.2	0	0	2.75	15.86	4.24	1.49	81.63
2	66	0	303.21	15	18.2	58	10.8	60	25.2	1.5	4.49	1.76	3.16	0.64	114	1.77	175	34.6	121	13	142	0	0	0	2.28	15.6	5.4	1.89	81.63
2	66	1	303.21	13	16	75	18	53	25.5	1.9	5.94	1.64	3.46	0.5	12	1.77	174	34	115	7	132	1316.28	0.05	100.49	2.75	15.86	4.24	1.49	81.63
1	66	2	303.21	19.3	15.4	57	18	82.51	27.01	1.55	5.26	0.92	3.24	0.78	224.09	1.29	253.96	43.59	119.7	17.56	178.31	1316.28	0.05	100.49	2.75	15.86	4.24	1.49	81.63
1	66	0	303.21	16	25	69	18	78	24.8	1.7	5.42	1.42	2.04	0.43	27	1.57	253.96	43.59	119.7	17.56	178.31	1316.28	0.05	100.49	2.75	15.86	4.24	1.49	81.63
1	66	2	303.21	27	17	77	12	67	20.4	1.9	4.8	0.83	2.72	0.85	305	1.17	253.96	43.59	119.7	17.56	178.31	1316.28	0.05	100.49	2.75	15.86	4.24	1.49	81.63
1	66	1	303.21	20	23	84	54	68	21.4	1.5	3.98	0.78	2.67	0.45	354	0.96	253.96	43.59	119.7	17.56	178.31	1316.28	0.05	100.49	2.75	15.86	4.24	1.49	81.63
2	66	3	303.21	42	47	52	47	87	28.5	1.3	5.23	0.89	4.15	1.07	612	1.25	199	29	29	4	140	1316.28	0.05	100.49	2.75	15.86	4.24	1.49	81.63
2	66	2	303.21	25.06	26.4	81.06	43	82.51	27.01	1.55	5.5	1.23	2.9	0.8494	224.09	1.29	253.96	43.59	119.7	17.56	178.31	1316.28	0.05	100.49	2.75	15.86	4.24	1.49	81.63
2	66	2	125.6	44	24	50	96	89	21.1	2.1	5.37	1.23	2.9	0.8494	266.2	1	189	33	108	14	179	16.7	0.01	29.16	1.64	17.02	5.05	1.77	81.63
1	66	3	10.48	10	22	63	83	73	29	1.2	5.66	1.23	2.9	0.63	531.4	0.67	279	43	63	9	197	685	0.02	25.11	2.75	15.86	4.24	1.49	31.97
1	66	2	303.21	8	15	89	104	76	22.9	1.6	4.57	1.36	2.1	0.45	176	1.56	253.96	43.59	119.7	17.56	178.31	1316.28	0.05	100.49	2.75	15.86	4.24	1.49	2.71
2	66	2	406	17.7	23.6	66	14.3	100	26.7	1.6	5.12	1.49	3.53	1.37	411	1.68	187	33	80	9	145	93.6	0.01	0	1.9	13.4	4.1	1.48	81.63
1	66	3	303.21	88	66	123	23	86	31.4	1.3	6.24	1.23	2.9	0.55	603	1.22	253.96	43.59	119.7	17.56	178.31	1316.28	0.05	100.49	2.75	15.86	4.24	1.49	81.63
1	66	0	495	15.6	23.4	55	37.1	116	35.3	1	4.16	1.23	2.9	0.8494	224.09	1.29	253.96	43.59	119.7	17.56	178.31	102.5	0.01	25.29	1.75	14.6	4.76	1.7	8.04
2	66	1	303.21	25.06	26.4	81.06	43	82.51	27.01	1.55	5.5	1.23	2.9	0.8494	224.09	1.29	253.96	43.59	119.7	17.56	178.31	1316.28	0.05	100.49	2.75	15.86	4.24	1.49	81.63
1	66	0	303.21	11	15	63	18.3	82.51	27.01	1.55	4.28	1.02	1.94	0.57	224.09	1.29	253.96	43.59	119.7	17.56	178.31	1316.28	0.05	100.49	2.75	15.86	4.24	1.49	81.63
2	66	1	303.21	43	41	64	43	82.51	27.01	1.55	5.5	1.23	2.9	0.8494	224.09	1.29	179	30	156	8	126	1316.28	0.05	100.49	2.75	15.86	4.24	1.49	81.63
2	66	2	303.21	10.4	18.8	49	10.9	67	30	1.4	4.77	1.79	3.24	0.97	202	1.9	253.96	43.59	119.7	17.56	178.31	1316.28	0.05	100.49	2.75	15.86	4.24	1.49	81.63
2	66	0	303.21	25.06	26.4	81.06	43	82.51	27.01	1.55	5.5	1.23	2.9	0.8494	224.09	1.29	253.96	43.59	119.7	17.56	178.31	1316.28	0.05	100.49	2.75	15.86	4.24	1.49	81.63
2	65	1	303.21	16	18	69	23	54	36.6	1.2	5.12	1.23	2.9	1	154.7	1.25	166	32	37	13	126	1316.28	0.05	100.49	3.16	12.8	4.76	1.81	81.63
1	65	2	303.21	25	20	75	57	82.51	28.9	1.7	7.63	1.23	2.9	0.8494	224.09	1.29	253.96	43.59	119.7	17.56	178.31	1316.28	0.05	100.49	2.75	15.86	4.24	1.49	81.63
1	65	1	303.21	12	17	72	20.2	64	29	1.5	5.66	0.98	3.58	1.12	91	1.19	253.96	43.59	119.7	17.56	178.31	1316.28	0.05	100.49	2.75	15.86	4.24	1.49	81.63
1	65	2	303.21	25.06	26.4	81.06	43	82.51	27.01	1.55	5.5	1.23	2.9	0.8494	224.09	1.29	253.96	43.59	119.7	17.56	178.31	1316.28	0.05	100.49	2.75	15.86	4.24	1.49	81.63
2	65	2	303.21	19.1	19.5	86	22.5	82.51	27.01	1.55	5.27	1.03	2.04	0.56	224.09	1.29	170	27	79	6	112	1316.28	0.05	100.49	2.75	15.86	4.24	1.49	81.63
1	65	2	481	24	19	98	29	85	38.6	1.1	6.86	1.39	2.86	0.49	239	1.22	183	27	63	12	138	374.9	0.01	40.89	0.87	13.6	4.3	1.27	81.63
1	65	3	303.21	34	26	72	51	82.51	30.2	1.5	5.09	1.23	2.9	0.8494	224.09	1.29	253.96	43.59	119.7	17.56	178.31	1316.28	0.05	100.49	2.75	15.86	4.24	1.49	81.63
1	65	0	303.21	22	23	77	19.2	45	25.6	1.8	5.33	1.2	3.88	1.29	20	1.54	253.96	43.59	119.7	17.56	178.31	1316.28	0.05	100.49	2.75	15.86	4.24	1.49	81.63
1	65	2	303.21	18	30	103	16	82.51	27.01	1.55	4.62	1.23	2.9	0.56	224.09	1.29	156	38	239	12	133	1316.28	0.05	100.49	2.75	15.86	4.24	1.49	81.63
2	65	1	303.21	25.06	26.4	81.06	43	82.51	27.01	1.55	5.5	1.23	2.9	0.8494	224.09	1.29	253.96	43.59	119.7	17.56	178.31	1316.28	0.05	100.49	2.75	15.86	4.24	1.49	81.63
2	65	1	303.21	18.4	23.2	56	25.3	77	28.6	1.6	5.24	1.12	1.84	0.78	68	1.53	164	27	109	8	124	1316.28	0.05	100.49	2.75	15.86	4.24	1.49	81.63
2	65	0	303.21	14	20	68	28	82.51	24.5	1.9	5.82	1.23	2.9	0.8494	224.09	1.29	204	39	81	7	127	1316.28	0.05	100.49	2.75	15.86	4.24	1.49	81.63
2	65	0	303.21	18	20	58	17	79	35.3	1.3	5.5	1.23	2.9	0.8494	224.09	1.29	253.96	43.59	119.7	17.56	178.31	1316.28	0.05	100.49	2.75	15.86	4.24	1.49	81.63
2	65	1	303.21	15	16	66	15	48	23.6	1.8	4.73	1.23	2.9	0.8494	559.3	1.5	253.96	43.59	119.7	17.56	178.31	1316.28	0.05	100.49	2.75	15.86	4.24	1.49	81.63
1	65	2	600.2	14	18	64	35	56	25.2	1.3	5.51	1.23	2.9	0.8494	224.8	0.9	229	41	44	11	161	25.1	0	22.55	1.1	17.08	4.16	1.58	81.63
2	65	1	303.21	19	19	48	15	82.51	27.01	1.55	5.1	1.23	2.9	0.65	224.09	1.29	253.96	43.59	119.7	17.56	178.31	1316.28	0.05	100.49	0.7	14	4.29	1.52	81.63
2	65	0	303.21	21	32	44	21	76	29.8	1.5	5.39	1.69	2.73	0.49	125	1.77	253.96	43.59	119.7	17.56	178.31	1316.28	0.05	100.49	2.75	15.86	4.24	1.49	81.63
2	65	2	303.21	15	14	81.06	12	82.51	24.6	1.7	4.79	1.23	2.9	0.8494	224.09	1.29	253.96	43.59	119.7	17.56	178.31	1316.28	0.05	100.49	2.75	15.86	4.24	1.49	81.63
2	65	1	303.21	13	23	37	39	60	29.2	1.3	5.83	1.23	2.9	0.93	27	1.07	120	24	37	8	109	142	0.01	0	1.35	17.22	4.46	1.55	4.06
1	65	2	303.21	22	18	63	23	71	29.3	1.4	4.73	0.98	2.62	0.99	682	1.22	253.96	43.59	119.7	17.56	178.31	1316.28	0.05	100.49	2.75	15.86	4.24	1.49	81.63
2	65	2	303.21	25	21	48	50	101	29.2	1.2	8.53	1.23	2.9	1.06	318.1	1.01	253.96	43.59	119.7	17.56	178.31	1316.28	0.05	100.49	2.75	15.86	4.24	1.49	81.63
2	65	3	303.21	42	32	61	18	82.51	27.01	1.55	5.81	1.23	2.9	0.8494	224.09	1.29	192	44	141	16	190	1316.28	0.05	100.49	3.28	15.75	4.93	1.49	81.63
2	65	2	303.21	14.2	20.5	59	14.2	73	23.8	2	5.21	0.82	3.58	1.77	126	1.14	253.96	43.59	119.7	17.56	178.31	1316.28	0.05	100.49	2.75	15.86	4.24	1.49	81.63
2	65	2	303.21	11	15	45	9	82.51	27.01	1.55	6.21	1.23	2.9	0.8494	224.09	1.29	253.96	43.59	119.7	17.56	178.31	1316.28	0.05	100.49	2.75	15.86	4.24	1.49	81.63
2	65	0	303.21	11.5	12.9	103	24.2	65	29.6	1.4	3.93	1.05	3.27	1.33	60	1.36	253.96	43.59	119.7	17.56	178.31	1316.28	0.05	100.49	2.75	15.86	4.24	1.49	11.31
2	65	1	303.21	21	23	57	21	82.51	27.01	1.55	5.29	1.23	2.9	1.12	224.09	1.29	253.96	43.59	119.7	17.56	178.31	1316.28	0.05	100.49	2.75	15.86	4.24	1.49	81.63
2	65	0	303.21	13	18	48	17.9	42	28.2	1.6	5.75	1.8	2.67	0.49	33	1.86	253.96	43.59	119.7	17.56	178.31	1316.28	0.05	100.49	2.75	15.86	4.24	1.49	81.63
1	65	2	303.21	37	25	78	61	63	30.5	1.2	4.67	1.02	1.88	0.35	360	1.06	253.96	43.59	119.7	17.56	178.31	242.4	0.01	197.4	2.75	15.86	4.24	1.49	13.55
1	64	2	303.21	17.6	16.7	57	17.8	61	24.7	1.4	4.78	1.37	2.44	0.59	160	1.64	173	39.9	380	25	149	46.6	0	216.8	2.75	15.86	4.24	1.49	111.3
2	64	0	303.21	12	24	59	13	83	25.2	1.6	4.38	1.23	2.9	0.76	739.5	1.48	188	36	98	11	167	1316.28	0.05	100.49	2.75	15.86	4.24	1.49	81.63
1	64	3	266	31	23	82	43	55	28.4	1.5	6.57	1.31	2.68	0.67	103	1.63	137	30	51	10	105	1316.28	0.05	100.49	3.16	17.7	4.8	1.78	81.63
2	64	0	303.21	6	15	60	17	54	31.8	1.4	5.5	1.23	2.9	0.8494	224.09	1.29	253.96	43.59	119.7	17.56	178.31	1316.28	0.05	100.49	2.75	15.86	4.24	1.49	81.63
1	64	2	319.5	25.06	26.4	81.06	43	82.51	27.01	1.55	5.5	1.23	2.9	0.8494	224.09	1.29	253.96	43.59	119.7	17.56	178.31	1316.28	0.05	100.49	2.75	15.86	4.24	1.49	81.63
1	64	2	171	32.9	28.5	94	31.7	66	32.6	1.4	6.01	1.08	2.34	1	63	1.38	145	24.7	157	10	107	1316.28	0.05	100.49	2.98	15.6	5.53	1.83	81.63
1	64	0	303.21	25	23	89	24	82.51	27.01	1.55	5.06	1.23	2.9	1.11	224.09	1.29	145	27	112	9	119	1316.28	0.05	100.49	2.75	15.86	4.24	1.49	81.63
2	64	0	65.89	6	21	64	12	61	27.7	1.7	5.46	1.23	2.9	1.07	481.5	1.78	225	34	112	11	150	1316.28	0.05	100.49	2.14	18.43	4.76	1.53	81.63
2	64	1	192	20	21	56	21	67	28.7	1.5	5.48	1.78	3.6	0.68	275	1.73	173	35	222	11	132	1316.28	0.05	100.49	3.45	11.79	5.42	1.84	81.63
2	64	2	303.21	25.06	26.4	81.06	43	82.51	27.01	1.55	5.5	1.23	2.9	0.8494	224.09	1.29	253.96	43.59	119.7	17.56	178.31	1316.28	0.05	100.49	2.75	15.86	4.24	1.49	81.63
1	64	1	303.21	19	18	78	22	53	33	1.2	7.94	1.33	2.08	0.63	11.8	1.48	158	30	120	13	121	1316.28	0.05	100.49	2.75	15.86	4.24	1.49	81.63
2	64	0	303.21	36.2	24.5	62	127.8	82.51	27.01	1.55	7.04	0.67	3.02	1.2	224.09	1.29	253.96	43.59	119.7	17.56	178.31	1316.28	0.05	100.49	2.75	15.86	4.24	1.49	81.63
2	64	2	303.21	14	23	62	15	60	24	1.9	5.09	1.44	2.23	0.55	61	1.83	120	27	73	12	98	1316.28	0.05	100.49	4.45	15.3	4.32	1.64	81.63
2	64	0	241	11	15	64	10	85	25.7	1.5	4.83	1.3	2.7	0.56	14	1.43	196	37	75	13	151	56.7	0.01	23.23	2.04	19.1	3.61	1.06	81.63
2	64	0	303.21	11	18	63	17	90	25.7	1.7	4.64	1.41	3.78	1.24	133	1.53	253.96	43.59	119.7	17.56	178.31	1316.28	0.05	100.49	0.24	20.1	3.71	1.34	81.63
1	64	0	303.21	24	21	60	23.8	77	23	1.9	4.62	0.84	3.17	1.09	65	1.1	253.96	43.59	119.7	17.56	178.31	1316.28	0.05	100.49	2.75	15.86	4.24	1.49	81.63
1	64	2	303.21	16	22	69	11	82.51	23.5	1.6	4.84	1.23	2.9	0.8494	224.09	1.29	253.96	43.59	119.7	17.56	178.31	1316.28	0.05	100.49	2.75	15.86	4.24	1.49	81.63
1	64	2	528	19.2	23.3	82	21	62	24.2	1.8	5.05	1.18	3.19	0.85	211	1.4	180	30.1	239	8	134	109.6	0.01	47.46	1.64	20.8	5.57	1.88	81.63
1	64	2	303.21	60	31	69	38	46	20.6	2	5.26	1.23	2.9	0.37	509	1.31	253.96	43.59	119.7	17.56	178.31	1316.28	0.05	100.49	2.75	15.86	4.24	1.49	81.63
2	64	0	303.21	27	21	76	68	82.51	27.01	1.55	4.46	0.73	3.96	0.89	224.09	1.29	253.96	43.59	119.7	17.56	178.31	1316.28	0.05	100.49	2.75	15.86	4.24	1.49	81.63
2	64	1	122	32	27	62	104	107	30.4	1.5	5.72	1.23	2.9	1.09	143.9	1.8	253.96	43.59	119.7	17.56	178.31	1316.28	0.05	100.49	2.75	15.86	4.24	1.49	81.63
2	64	2	303.21	13	18	52	21	82.51	27.01	1.55	4.55	0.89	4.35	1.12	224.09	1.29	253.96	43.59	119.7	17.56	178.31	1316.28	0.05	100.49	2.75	15.86	4.24	1.49	81.63
2	64	0	303.21	32	33	52	68	77	26.1	1.5	4.59	1.23	2.9	0.83	69.9	1.14	253.96	43.59	119.7	17.56	178.31	1316.28	0.05	100.49	2.75	15.86	4.24	1.49	22.49
2	64	1	117	7	17	55	8	42	22	1.9	4.44	1.23	2.9	0.28	298	1.76	176	33	103	10	142	85.1	0	38.11	1.32	15.6	6.04	2.13	81.63
1	64	3	303.21	17.2	23.7	80	43	82.51	27.01	1.55	5.5	1.23	2.9	0.8494	224.09	1.29	147	32	106	9	120	1316.28	0.05	100.49	2.75	15.86	4.24	1.49	81.63
2	64	1	303.21	9	18	78	7.9	51	27	1.5	4.53	1.49	2.99	0.52	169	1.61	253.96	43.59	119.7	17.56	178.31	1316.28	0.05	100.49	2.75	15.86	4.24	1.49	81.63
1	64	2	303.21	37	24	57	25	99	27.5	1.4	4.22	0.97	2.58	0.64	47	1.14	253.96	43.59	119.7	17.56	178.31	1316.28	0.05	100.49	2.75	15.86	4.24	1.49	81.63
2	64	1	303.21	25.06	26.4	81.06	43	82.51	27.01	1.55	5.5	1.23	2.9	0.8494	224.09	1.29	253.96	43.59	119.7	17.56	178.31	1316.28	0.05	100.49	2.75	15.86	4.24	1.49	81.63
2	64	3	303.21	34	45	50	24	82.51	27.01	1.55	4.88	1.23	2.9	0.89	224.09	1.29	253.96	43.59	119.7	17.56	178.31	1316.28	0.05	100.49	2.75	15.86	4.24	1.49	81.63
1	64	0	303.21	15	26.4	81	43	82.51	27.01	1.55	5.34	1.23	2.9	0.8494	224.09	1.29	253.96	43.59	119.7	17.56	178.31	1316.28	0.05	100.49	2.75	15.86	4.24	1.49	81.63
2	64	0	303.21	25.06	26.4	81.06	43	82.51	27.01	1.55	5.5	1.23	2.9	0.8494	224.09	1.29	253.96	43.59	119.7	17.56	178.31	1316.28	0.05	100.49	2.75	15.86	4.24	1.49	81.63
2	63	0	86.43	16	18	61	15	60	26.2	1.6	4.79	1.23	2.9	0.6	350.1	1.48	179	29	152	10	140	60.3	0.01	32.54	4.42	18.26	4.77	1.86	1.85
1	63	1	303.21	33	29	86	20	82.51	27.01	1.55	5.23	1.23	2.9	0.79	224.09	1.29	132	27	90	6	101	1316.28	0.05	100.49	2.75	15.86	4.24	1.49	81.63
1	63	1	303.21	20	19	79	12	60	22.2	1.8	4.78	1.13	3.57	0.76	151	1.31	253.96	43.59	119.7	17.56	178.31	1316.28	0.05	100.49	2.75	15.86	4.24	1.49	81.63
2	63	3	303.21	17.4	21.5	77	26.6	65	30.5	1.4	6.22	1.79	3.32	0.75	143.5	1.8	147	19.3	78	8	109	1316.28	0.05	100.49	2.8	16.3	4.67	1.96	81.63
2	63	2	241	50	31	65	41	56	29.2	1.6	5.22	1.61	2.42	0.71	81	1.88	188	32	102	8	138	1316.28	0.05	100.49	1.82	14.3	4.78	1.54	81.63
2	63	2	303.21	15	24	66	21	93	35.4	1.4	4.84	1.2	4.12	1.56	214	1.45	253.96	43.59	119.7	17.56	178.31	1316.28	0.05	100.49	2.75	15.86	4.24	1.49	81.63
1	63	0	303.21	31.6	15.2	101	74.8	69	31.9	1.4	6.03	1.41	3.22	1.4	69	1.61	139	23.9	76	13	104	1316.28	0.05	100.49	2.75	15.86	4.24	1.49	81.63
2	63	0	303.21	11	28	56	19	62	24.2	1.5	4.88	1.23	2.9	1.16	221.3	1.03	281	47	269	33	193	1316.28	0.05	100.49	2.75	15.86	4.24	1.49	81.63
1	63	0	303.21	29	17	71	43	82.51	27.01	1.55	7.68	1.23	2.9	0.8494	224.09	1.29	140	28	83	9	115	1316.28	0.05	100.49	2.75	15.86	4.24	1.49	81.63
1	63	2	303.21	23	26	67	33	82.51	27.5	1.7	7.82	1.23	2.9	0.8494	224.09	1.29	253.96	43.59	119.7	17.56	178.31	1316.28	0.05	100.49	2.75	15.86	4.24	1.49	81.63
2	63	0	187.3	19	18	59	19	77	25.9	1.7	5.12	1.23	2.9	1.37	205.5	1.14	309	46	266	14	258	73.4	0	0	0.6	18.16	3.96	1.6	81.63
1	63	1	303.21	26.6	19.4	75	17.6	60	25.6	1.9	5.97	1.75	3.07	0.9	425	2.02	165	30.1	111	12	124	1316.28	0.05	100.49	4.3	15.1	4.57	1.03	81.63
2	63	1	303.21	25.8	23.6	48	36.7	118	29.1	1.6	5.35	1.39	3.31	1.21	79	1.61	253.96	43.59	119.7	17.56	178.31	1316.28	0.05	100.49	2.75	15.86	4.24	1.49	81.63
2	63	0	303.21	51	38	54	27	82.51	27.01	1.55	5.41	1.23	2.9	0.7	224.09	1.29	253.96	43.59	119.7	17.56	178.31	1316.28	0.05	100.49	2.75	15.86	4.24	1.49	81.63
1	63	0	303.21	45	33	72	27	82.51	27.01	1.55	6.34	1.23	2.9	0.8494	224.09	1.29	253.96	43.59	119.7	17.56	178.31	1316.28	0.05	100.49	2.75	15.86	4.24	1.49	81.63
2	63	2	303.21	46	46	66	25	91	23.9	1.6	4.78	1.23	2.9	0.67	387	1.25	216	31	65	7	160	233.1	0.01	21.24	2.25	14.7	4.13	1.24	81.63
2	63	1	303.21	20	16	53	49	82.51	27.01	1.55	5.78	1.23	2.9	0.8494	224.09	1.29	253.96	43.59	119.7	17.56	178.31	1316.28	0.05	100.49	2.75	15.86	4.24	1.49	81.63
1	63	0	130	12.3	15.5	68	48.5	48	20.4	2.3	6.02	1.55	2.49	0.73	359	1.55	253.96	43.59	119.7	17.56	178.31	58.7	0.01	26.73	2.88	17.7	5.17	1.88	1.58
2	63	2	303.21	17.6	25.8	71	14.5	82.51	27.01	1.55	5.5	1.57	3.44	1.01	224.09	1.29	253.96	43.59	119.7	17.56	178.31	1316.28	0.05	100.49	2.75	15.86	4.24	1.49	81.63
2	63	1	303.21	12	14	47	12	63	21	1.9	4.68	1.23	2.9	0.72	150	1.49	253.96	43.59	119.7	17.56	178.31	27.1	0	0	2.75	15.86	4.24	1.49	81.63
2	63	1	303.21	12	20	46	14	99	27.4	1.6	5.39	1.4	4.11	1.26	518	1.58	200	36	212	13	144	154.2	0.01	34.54	2.75	15.86	4.24	1.49	81.63
1	63	2	303.21	18	19	73	22	60	25.5	1.5	4.5	0.89	2.49	1.07	172	1.24	253.96	43.59	119.7	17.56	178.31	1316.28	0.05	100.49	2.75	15.86	4.24	1.49	81.63
1	63	0	413.5	61	27	87	43	82.51	27.01	1.55	5.5	1.23	2.9	0.8494	224.09	1.29	165	24	379	18	122	1316.28	0.05	100.49	1.11	15.42	4.4	1.78	81.63
2	63	2	422	31	25	54	32	60	24.5	1.6	5.25	0.82	2.86	0.75	430	1.01	214	33	81	8	156	89.6	0.01	187.4	1.69	13.2	3.55	1.36	3.58
1	63	0	303.21	7	10	77	12	80	28.4	1.2	3.85	1.23	2.9	0.88	168	1.04	253.96	43.59	119.7	17.56	178.31	1316.28	0.05	100.49	2.75	15.86	4.24	1.49	81.63
2	63	0	303.21	19	19	59	19	64	30.1	1.7	5.26	1.16	3.23	0.94	90	1.4	253.96	43.59	119.7	17.56	178.31	1316.28	0.05	100.49	2.75	15.86	4.24	1.49	81.63
1	63	0	303.21	21	21	67	23	69	26.3	1.7	5.23	1.23	2.9	1.24	102	1.32	253.96	43.59	119.7	17.56	178.31	1316.28	0.05	100.49	2.75	15.86	4.24	1.49	81.63
2	63	0	303.21	25.06	26.4	81.06	43	82.51	27.01	1.55	5.5	1.23	2.9	0.8494	224.09	1.29	253.96	43.59	119.7	17.56	178.31	1316.28	0.05	100.49	2.75	15.86	4.24	1.49	81.63
2	63	1	102.9	30	28	51	39	82.51	31.1	1.4	5.54	1.23	2.9	0.8494	224.09	1.29	253.96	43.59	119.7	17.56	178.31	81.5	0	37.82	1.38	14.97	4.81	1.98	81.63
2	63	1	303.21	10	20	62	12	61	34.7	1.2	4.73	1.23	2.9	0.95	424.2	0.96	165	29	56	12	122	43.8	0	21.91	2.75	15.86	4.24	1.49	2.92
1	63	3	366.05	4	9	342	29	79	18	1.9	7.51	1.23	2.9	0.8494	224.09	1.29	155	34	30	5	126	0	0.18	97.8	2.75	15.86	4.24	1.49	81.63
1	63	2	773	112	29	56	52	72	33.7	1.1	6.7	1.23	2.9	0.71	576	1.26	434	60	21	12	308	25.1	0.01	32.37	5.66	19.8	5.05	1.74	48.35
1	63	0	303.21	32	23	85	40	74	29.6	1.5	5.74	0.84	2.55	0.85	54	1.12	253.96	43.59	119.7	17.56	178.31	1316.28	0.05	100.49	2.75	15.86	4.24	1.49	81.63
2	63	2	303.21	17	20	52	45	82.51	31.3	1.5	6.87	1.23	2.9	0.89	224.09	1.29	253.96	43.59	119.7	17.56	178.31	1316.28	0.05	100.49	2.75	15.86	4.24	1.49	81.63
2	63	1	303.21	15	23	58	31	78	29.1	1.6	5.35	1.23	2.9	0.8494	97.1	1.3	253.96	43.59	119.7	17.56	178.31	1316.28	0.05	100.49	2.75	15.86	4.24	1.49	81.63
2	63	0	303.21	29	23	49	26	90	34.3	1.4	5.84	1.23	2.9	1.51	342.5	1.36	253.96	43.59	119.7	17.56	178.31	1316.28	0.05	100.49	2.75	15.86	4.24	1.49	81.63
1	63	3	92.43	9	11	81	17	55	25.6	1.5	5.38	1.23	2.9	0.58	282.6	0.94	103	24	50	11	91	1316.28	0.05	100.49	2	12.97	4.3	1.64	81.63
2	63	2	303.21	13	23	82	13	82.51	27.01	1.55	5.48	1.23	2.9	1.09	224.09	1.29	253.96	43.59	119.7	17.56	178.31	1316.28	0.05	100.49	2.75	15.86	4.24	1.49	81.63
1	63	0	0	16	22	87	78	90	26.4	1.3	7.88	1.23	2.9	0.48	299	1.31	197	35	41	32	170	1241	0.02	0	0.34	15.5	2.97	1.23	81.63
2	63	3	303.21	25	32	62	43	82.51	27.01	1.55	5.17	1.23	2.9	0.8494	224.09	1.29	187	23.3	43	7.3	122	1316.28	0.05	100.49	2.75	15.86	4.24	1.49	81.63
2	62	1	303.21	13.5	17.9	53	11.5	35	25.4	1.5	4.42	1.22	4.2	1.1	188	1.34	253.96	43.59	119.7	17.56	178.31	1316.28	0.05	100.49	2.75	15.86	4.24	1.49	81.63
2	62	1	303.21	14	20.2	68	19.8	58	25.3	1.6	5.47	1.35	2.73	1.08	113	1.64	253.96	43.59	119.7	17.56	178.31	1316.28	0.05	100.49	2.75	15.86	4.24	1.49	81.63
2	62	2	303.21	34	26	68	26	87	24.1	1.8	5.36	1.23	2.9	1.26	234.7	1.89	253.96	43.59	119.7	17.56	178.31	1316.28	0.05	100.49	2.75	15.86	4.24	1.49	81.63
2	62	1	303.21	17	14	51	12	69	22.9	2	5.97	1.23	2.9	0.8494	344.7	1.5	156	33	46	6	107	1316.28	0.05	100.49	2.75	15.86	4.24	1.49	81.63
2	62	1	237	42	28	61	21	79	31.6	1.4	4.49	1.34	1.99	0.88	27	1.73	193	30	92	12	131	1316.28	0.05	100.49	3.01	14.5	4.82	1.73	81.63
1	62	3	303.21	19	27	75	33	70	29.7	1.5	4.81	1.18	3.14	0.95	23	1.48	253.96	43.59	119.7	17.56	178.31	1316.28	0.05	100.49	2.75	15.86	4.24	1.49	81.63
2	62	1	303.21	25.06	26.4	81.06	43	82.51	27.01	1.55	5.5	1.23	2.9	0.8494	224.09	1.29	253.96	43.59	119.7	17.56	178.31	1316.28	0.05	100.49	2.75	15.86	4.24	1.49	81.63
2	62	2	155.7	14	14	53	12	48	19.1	2.1	4.81	1.23	2.9	0.87	86.7	0.98	131	22	80	8	107	29.8	0	0	1.24	12.82	3.39	0.91	4.79
1	62	3	303.21	17.2	15.3	78	34.1	47	28.6	1.7	9.36	1.27	3.3	1.25	227	1.52	253.96	43.59	119.7	17.56	178.31	1316.28	0.05	100.49	2.75	15.86	4.24	1.49	81.63
2	62	0	303.21	23	25	50	17	82.51	27.01	1.55	5.59	1.28	3.42	0.45	224.09	1.29	253.96	43.59	119.7	17.56	178.31	1316.28	0.05	100.49	1.83	21.02	5.02	1.62	81.63
2	62	0	303.21	14	18	58	12	82.51	27.01	1.55	5.67	1.23	2.9	0.8494	224.09	1.29	253.96	43.59	119.7	17.56	178.31	1316.28	0.05	100.49	2.75	15.86	4.24	1.49	81.63
1	62	0	104	6	17	63	22	62	25.5	1.8	5.34	1.09	2.35	0.7	151	1.19	132	30	147	10	135	1316.28	0.05	100.49	1.14	17.7	5.52	2.03	81.63
1	62	0	303.21	23.5	21.9	110	27.6	67	26.7	1.7	5.6	0.75	1.41	0.68	98	1.13	138	28.8	76	8	104	19.3	0.01	100.49	2.75	15.86	4.24	1.49	81.63
2	62	2	220	29	23	61	52	91	26.9	1.6	6.08	1.23	2.9	1.02	42.8	1.86	198	32	81	8	152	1316.28	0.05	100.49	2.27	13.47	4.24	1.54	81.63
2	62	1	219.7	10	16	58	28	95	28.9	1.3	5.11	1.23	2.9	0.7	51	1.31	147	30	51	4	102	1316.28	0.05	100.49	2.75	15.86	4.24	1.49	81.63
1	62	2	260	19	22	85	27.4	107	28.4	1.6	5.43	1.09	3.23	1.43	64	1.4	168	30.9	185	9	127	61	0.01	43.52	2.36	14.3	4.89	1.91	81.63
2	62	0	173	36.1	53.1	50	97.2	103	28.4	1.2	5.1	1.18	4.48	1.62	97	1.14	172	37.8	22	6.5	135	102.1	0	0	0.16	17.7	4.27	1.74	81.63
1	62	1	303.21	20	26	91	25	84	24.4	1.8	4.82	1.23	2.9	0.56	101	1.29	185	18	329	11	124	37.5	0	43.92	2.75	15.86	4.24	1.49	81.63
1	62	0	156.7	16	15	69	18	82	21.8	2.1	5.21	1.23	2.9	0.8494	228	1.4	253.96	43.59	119.7	17.56	178.31	1316.28	0.05	100.49	2.73	18.16	5.67	1.99	81.63
1	62	3	241	52	47	76	45	70	33.7	1.4	5.05	1.23	2.9	1.54	38	1.61	253.96	43.59	119.7	17.56	178.31	0	0.01	22.53	1.22	18	6.47	1.85	81.63
2	62	2	303.21	25.06	26.4	81.06	43	82.51	27.01	1.55	5.5	1.23	2.9	0.8494	224.09	1.29	253.96	43.59	119.7	17.56	178.31	1316.28	0.05	100.49	2.75	15.86	4.24	1.49	81.63
1	62	0	303.21	11	16	62	40	79	27.5	1.3	4.65	0.79	1.82	0.51	625	0.99	253.96	43.59	119.7	17.56	178.31	1316.28	0.05	100.49	2.75	15.86	4.24	1.49	81.63
2	62	0	303.21	15	19	50	19	63	27.6	1.6	5.49	1.23	2.9	0.63	224.09	1.29	169	32	74	11	131	1316.28	0.05	100.49	2.75	15.86	4.24	1.49	81.63
2	62	0	303.21	25.06	26.4	81.06	43	82.51	27.01	1.55	5.5	1.23	2.9	0.8494	224.09	1.29	253.96	43.59	119.7	17.56	178.31	1316.28	0.05	100.49	2.75	15.86	4.24	1.49	81.63
1	62	2	303.21	9	15	56	20	90	30.6	1.5	5	1.23	2.9	1.2	97	1.57	253.96	43.59	119.7	17.56	178.31	1316.28	0.05	100.49	2.75	15.86	4.24	1.49	81.63
2	62	2	303.21	20	17	58	22	81	28.9	1.6	4.78	1.23	2.9	0.8494	138.8	1.3	253.96	43.59	119.7	17.56	178.31	1316.28	0.05	100.49	2.75	15.86	4.24	1.49	81.63
2	62	0	303.21	16	25	76	14	82.51	27.01	1.55	5.43	1.23	2.9	0.8494	224.09	1.29	253.96	43.59	119.7	17.56	178.31	1316.28	0.05	100.49	2.75	15.86	4.24	1.49	81.63
1	62	1	303.21	11	15	69	28	38	21.1	1.7	6.21	1.43	2.69	0.7	353	1.33	253.96	43.59	119.7	17.56	178.31	1316.28	0.05	100.49	2.75	15.86	4.24	1.49	81.63
1	62	1	303.21	24.6	21.8	67	24.4	40	20.8	1.9	4.72	0.75	2.93	0.67	43	0.9	253.96	43.59	119.7	17.56	178.31	1316.28	0.05	100.49	2.75	15.86	4.24	1.49	81.63
2	62	3	303.21	20	16	53	30	73	21.1	1.9	5.28	1.23	2.9	0.8494	106.1	1.3	253.96	43.59	119.7	17.56	178.31	1316.28	0.05	100.49	2.75	15.86	4.24	1.49	81.63
2	62	0	303.21	14.1	20.5	62	31	78	26	1.7	5.19	1.17	3.72	1.1	683	1.47	253.96	43.59	119.7	17.56	178.31	1316.28	0.05	100.49	2.75	15.86	4.24	1.49	81.63
1	62	1	303.21	17.6	22.3	79	19.8	95	27.3	1.5	4.89	1.05	2.82	1.08	138	1.27	253.96	43.59	119.7	17.56	178.31	1316.28	0.05	100.49	2.75	15.86	4.24	1.49	81.63
1	62	0	303.21	18	25	93	15	70	28.4	1.7	5.25	1.23	2.9	0.62	121	1.34	253.96	43.59	119.7	17.56	178.31	1316.28	0.05	100.49	2.75	15.86	4.24	1.49	81.63
1	62	1	281.3	99	49	67	31	54	25.1	1.4	5.54	1.23	2.9	0.67	620.3	0.87	111	24	67	5	87	110.9	0.01	34.16	0.18	11.71	4.62	1.53	2.42
1	62	0	303.21	25.06	26.4	81.06	43	82.51	27.01	1.55	5.5	1.23	2.9	0.8494	224.09	1.29	253.96	43.59	119.7	17.56	178.31	1316.28	0.05	100.49	2.75	15.86	4.24	1.49	81.63
1	62	1	303.21	25.06	26.4	81.06	43	82.51	27.01	1.55	5.5	1.23	2.9	0.8494	224.09	1.29	253.96	43.59	119.7	17.56	178.31	1316.28	0.05	100.49	2.75	15.86	4.24	1.49	81.63
1	62	1	366.1	16	15	85	25	48	20.9	2.2	5.54	1.23	2.9	0.8494	161.4	0.9	253.96	43.59	119.7	17.56	178.31	1316.28	0.05	100.49	1.28	18.6	4.91	1.63	81.63
2	62	2	303.21	16	20	62	12	82.51	27.01	1.55	4.81	1.23	2.9	0.65	224.09	1.29	212	34	162	11	162	1316.28	0.05	100.49	2.75	15.86	4.24	1.49	81.63
2	62	2	303.21	27.4	34.1	53	14.8	64	27.7	1.6	5.06	1.35	2.64	0.79	214	1.62	253.96	43.59	119.7	17.56	178.31	85.3	0.01	38.8	2.75	15.86	4.24	1.49	19.39
2	62	1	303.21	16	20	61	14	54	21.9	2.1	5.5	1.23	2.9	0.8494	224.09	1.29	253.96	43.59	119.7	17.56	178.31	1316.28	0.05	100.49	2.75	15.86	4.24	1.49	81.63
1	62	3	303.21	11	21	103	20	49	32.9	1.3	4.23	1.14	2.73	0.84	80	1.31	253.96	43.59	119.7	17.56	178.31	1316.28	0.05	100.49	2.75	15.86	4.24	1.49	81.63
2	62	0	303.21	8	14	49	13	121	20.3	1.9	4.73	1.23	2.9	0.45	18.9	1.19	253.96	43.59	119.7	17.56	178.31	1316.28	0.05	100.49	1.44	17.3	4.43	1.54	23.74
1	61	2	303.21	10	14.9	78	22.8	85	25.7	1.6	5.69	1.35	2.83	0.58	373	1.37	253.96	43.59	119.7	17.56	178.31	1316.28	0.05	100.49	2.75	15.86	4.24	1.49	81.63
2	61	1	303.21	139	117	56	115	82.51	27.01	1.55	5.24	1.23	2.9	0.52	224.09	1.29	253.96	43.59	119.7	17.56	178.31	1316.28	0.05	100.49	2.75	15.86	4.24	1.49	81.63
1	61	1	303.21	12	16	71	13	41	19.9	1.8	4.46	1.23	2.9	1.11	20.6	0.83	253.96	43.59	119.7	17.56	178.31	111.7	0.01	36.29	2.75	15.86	4.24	1.49	17.12
1	61	3	193.5	33	19	70	43	64	23.3	2	5.42	1.23	2.9	0.81	212	0.88	188	29	97	8	128	1316.28	0.05	100.49	1.05	18.25	5.61	1.86	81.63
2	61	0	303.21	6	20	55	16	82.51	27.01	1.55	4.85	1.23	2.9	0.48	224.09	1.29	253.96	43.59	119.7	17.56	178.31	1316.28	0.05	100.49	2.75	15.86	4.24	1.49	81.63
1	61	2	303.21	17	15	86	41	71	28.3	1.4	5.45	0.99	3.02	0.58	167	1.21	253.96	43.59	119.7	17.56	178.31	1316.28	0.05	100.49	2.75	15.86	4.24	1.49	81.63
2	61	1	303.21	19	20	45	24	95	28.6	1.6	5.41	1.49	2.56	0.67	53	1.71	221	40	82	8	209	1316.28	0.05	100.49	2.75	15.86	4.24	1.49	81.63
1	61	1	303.21	25.06	26.4	81.06	43	82.51	27.01	1.55	5.5	1.23	2.9	0.8494	224.09	1.29	253.96	43.59	119.7	17.56	178.31	1316.28	0.05	100.49	2.75	15.86	4.24	1.49	81.63
1	61	1	303.21	30	27	79	32	87	25.7	1.9	6.33	0.95	1.85	0.66	226	1.23	253.96	43.59	119.7	17.56	178.31	1316.28	0.05	100.49	2.75	15.86	4.24	1.49	81.63
1	61	0	583	33	22	72	86	61	27.2	1.7	5.75	1.23	2.9	1.08	42.4	1.4	152	23	161	10	122	12.8	0.01	39.24	1.76	15.7	5.31	1.32	81.63
2	61	1	303.21	25.06	26.4	81.06	43	82.51	27.01	1.55	5.5	1.23	2.9	0.8494	224.09	1.29	253.96	43.59	119.7	17.56	178.31	1316.28	0.05	100.49	2.75	15.86	4.24	1.49	81.63
2	61	3	303.21	17	14	81.06	43	82.51	27.01	1.55	5.5	1.23	2.9	0.8494	224.09	1.29	111	21	50	8	98	30.1	0	0	2.75	15.86	4.24	1.49	81.63
1	61	3	303.21	14	15	58	29	85	25.6	1.8	5.41	1.16	2.98	0.72	372	1.33	253.96	43.59	119.7	17.56	178.31	1316.28	0.05	100.49	2.75	15.86	4.24	1.49	81.63
2	61	2	303.21	30	30	73	16	61	31.7	1.4	5.19	1.6	3.77	0.69	270	1.7	253.96	43.59	119.7	17.56	178.31	1316.28	0.05	100.49	2.75	15.86	4.24	1.49	81.63
1	61	2	303.21	23.2	20.8	90	14.3	62	22.2	2.1	6.74	1.38	3.33	1.33	179.2	1.82	214	42.2	166	13	169	1316.28	0.05	100.49	2.75	15.86	4.24	1.49	81.63
1	61	1	303.21	12	13	77	12	52	18.9	2.1	4.7	1.02	2.41	0.56	261	1.21	253.96	43.59	119.7	17.56	178.31	1316.28	0.05	100.49	2.75	15.86	4.24	1.49	81.63
2	61	1	303.21	7	23	66	35	82.51	27.01	1.55	5.5	1.23	2.9	0.8494	224.09	1.29	253.96	43.59	119.7	17.56	178.31	1316.28	0.05	100.49	2.75	15.86	4.24	1.49	81.63
1	61	0	303.21	16	18	78	40	49	24.5	1.8	5.27	1.23	2.9	1.7	79.8	1.18	253.96	43.59	119.7	17.56	178.31	25.8	0.01	22.43	2.75	15.86	4.24	1.49	81.63
2	61	0	131.1	13.6	19.7	51	10	86	24	1.9	6.1	1.54	2.75	0.49	14	1.71	234	39	105	17	170	64	0	0	1.6	18.1	4.98	1.56	81.63
2	61	0	139.5	16	21	73	15	78	28.6	1.6	4.68	1.23	2.9	0.62	271.7	1.63	195	32	134	11	157	1316.28	0.05	100.49	2.39	15.56	5.15	1.51	81.63
2	61	2	303.21	10	15	54	14	82.51	27.01	1.55	6	1.23	2.9	0.8494	224.09	1.29	253.96	43.59	119.7	17.56	178.31	1316.28	0.05	100.49	2.75	15.86	4.24	1.49	81.63
2	61	0	245	19	20	58	21	79	29.1	1.6	5.23	1.23	2.9	0.66	541	1.48	170	33	163	9	126	1316.28	0.05	100.49	2.61	13.2	4.83	1.89	81.63
1	61	1	288	16	17	74	98	78	27.4	1.8	4.51	1.71	2.05	0.61	691	2.04	161	22	86	11	124	10.3	0.02	0	2.13	13.1	4.76	1.85	25.58
2	61	2	206	16	20	64	14.4	83	27.7	1.7	4.97	1.17	1.93	0.52	156	1.19	223	43	134	15	177	18.1	0.01	28.47	2.52	13.1	4.68	1.4	81.63
1	61	1	303.21	28.6	23.5	93	18.5	51	22.4	2	6.46	1.23	2.06	0.59	111	1.42	166	29.9	86	10	130	1316.28	0.05	100.49	2.75	15.86	4.24	1.49	81.63
2	61	1	303.21	9	14	59	13	82.51	27.01	1.55	5.12	1.23	2.9	0.8494	224.09	1.29	253.96	43.59	119.7	17.56	178.31	1316.28	0.05	100.49	2.75	15.86	4.24	1.49	81.63
2	61	2	167.7	9.9	17.2	68	9.9	55	25.4	1.8	5.25	1.51	2.57	0.78	192	1.82	167	35.1	65	9.5	129	28.8	0	0	0.92	18.42	4.88	1.73	81.63
2	61	0	103.8	18	20	68	12	94	22.8	1.7	4.04	1.23	2.9	1.04	345	1.71	183	34	113	11	148	125.5	0.01	29.19	2.75	15.86	4.24	1.49	81.63
1	61	3	203	13	17	69	64	74	35.4	1.3	6.67	1.23	4.2	1.49	51	1.46	253.96	43.59	119.7	17.56	178.31	1316.28	0.05	100.49	2.75	15.86	4.24	1.49	81.63
1	61	2	303.21	24	20	71	30	73	27.9	1.7	5.45	1.35	3.67	0.83	181	1.6	156	27	120	10	115	1316.28	0.05	100.49	2.75	15.86	4.24	1.49	81.63
2	61	0	303.21	15	22	55	17	55	31.5	1.4	5.01	1.46	3.18	0.52	223	1.52	253.96	43.59	119.7	17.56	178.31	1316.28	0.05	100.49	2.75	15.86	4.24	1.49	81.63
2	61	0	303.21	19	17	45	19	59	24.9	1.8	5.35	1.23	2.9	0.8494	204.5	1.1	253.96	43.59	119.7	17.56	178.31	1316.28	0.05	100.49	2.75	15.86	4.24	1.49	81.63
1	61	2	303.21	65.8	36.2	71	101.1	89	24.4	1.6	4.71	1.06	2.51	1	116	1.26	253.96	43.59	119.7	17.56	178.31	1316.28	0.05	100.49	2.75	15.86	4.24	1.49	81.63
2	61	1	303.21	21	20	55	28	82.51	27.01	1.55	4.77	1.23	2.9	0.93	224.09	1.29	253.96	43.59	119.7	17.56	178.31	1316.28	0.05	100.49	1.68	14.69	4.71	1.93	81.63
2	61	2	303.21	13	13	62	18	70	23.2	1.8	5.26	1.23	2.9	0.63	25.3	1.1	253.96	43.59	119.7	17.56	178.31	1316.28	0.05	100.49	2.75	15.86	4.24	1.49	81.63
1	61	0	303.21	20	15	68	35.7	56	27.5	1.6	8.74	0.91	3.1	1.1	348	1.2	253.96	43.59	119.7	17.56	178.31	1316.28	0.05	100.49	2.75	15.86	4.24	1.49	81.63
2	61	3	303.21	25.06	26.4	81.06	43	82.51	27.01	1.55	5.5	1.23	2.9	0.8494	224.09	1.29	253.96	43.59	119.7	17.56	178.31	1316.28	0.05	100.49	2.75	15.86	4.24	1.49	81.63
1	61	1	303.21	11	17	81.06	43	82.51	27.01	1.55	6.09	1.23	2.9	0.8494	224.09	1.29	197	40	67	16	156	1316.28	0.05	100.49	2.75	15.86	4.24	1.49	81.63
2	61	1	87.8	10	20	65	15	74	20.6	1.6	4.76	1.38	3.14	0.36	159	1.4	178	37	20	5	164	25.3	0.01	25.25	1.06	16.8	4.92	1.85	11.78
2	61	0	303.21	19	19.9	64	15.5	69	27.5	1.7	5.32	0.99	2.46	0.98	153	1.29	253.96	43.59	119.7	17.56	178.31	1316.28	0.05	100.49	1.93	17.7	4.88	1.81	81.63
1	61	0	303.21	21	28.9	67	25.8	74	23.4	1.8	5.04	1.05	2.13	0.75	75	1.12	253.96	43.59	119.7	17.56	178.31	1316.28	0.05	100.49	2.75	15.86	4.24	1.49	81.63
2	61	3	303.21	15	18	55	17	50	22.9	1.3	5.92	1	3.07	0.72	0	1.27	163	27.8	337	13	118	367.8	0.01	198.1	2.75	15.86	4.24	1.49	74.58
1	61	1	303.21	14	17	61	19	73	20.3	1.8	4.53	1.23	2.9	0.51	115	1.37	253.96	43.59	119.7	17.56	178.31	1316.28	0.05	100.49	2.75	15.86	4.24	1.49	81.63
2	61	0	303.21	14	18	52	10	67	22.3	1.8	4.56	1.64	3.25	0.47	129	1.62	200	35	148	14	152	155.8	0.01	28.15	3.26	12.7	4.36	1.73	9.46
1	61	2	303.21	53.2	23.4	65	32.6	82.51	26.2	1.9	8.8	1.23	2.9	0.8494	224.09	1.29	253.96	43.59	119.7	17.56	178.31	0	0.01	22.05	2.75	15.86	4.24	1.49	81.63
2	61	1	303.21	26	24	60	21	60	22.6	1.8	4.97	1.09	2.25	0.59	150	1.26	253.96	43.59	119.7	17.56	178.31	1316.28	0.05	100.49	2.75	15.86	4.24	1.49	81.63
1	61	1	303.21	79	90	72	91	61	30.4	1.3	4.8	1.23	2.9	0.6	182	1.22	253.96	43.59	119.7	17.56	178.31	1316.28	0.05	100.49	2.75	15.86	4.24	1.49	81.63
1	61	2	303.21	40.7	26.6	82	38.5	101	24.2	2	6.92	1.12	3.35	1.1	304	1.49	253.96	43.59	119.7	17.56	178.31	1316.28	0.05	100.49	2.75	15.86	4.24	1.49	81.63
2	61	0	303.21	25.06	26.4	81.06	43	82.51	27.01	1.55	5.5	1.23	2.9	0.8494	224.09	1.29	253.96	43.59	119.7	17.56	178.31	1316.28	0.05	100.49	2.75	15.86	4.24	1.49	81.63
1	61	2	303.21	16	18	76	16	82.51	27.01	1.55	4.96	1.23	2.9	0.8494	224.09	1.29	253.96	43.59	119.7	17.56	178.31	1316.28	0.05	100.49	2.75	15.86	4.24	1.49	81.63
2	61	0	303.21	70	42	60	27	56	24	1.6	5.99	1.23	2.9	0.78	103	1.39	253.96	43.59	119.7	17.56	178.31	1316.28	0.05	100.49	2.75	15.86	4.24	1.49	81.63
2	61	2	303.21	17	21	60	17	57	20.6	1.9	3.99	1.23	2.9	0.68	42	1.52	253.96	43.59	119.7	17.56	178.31	1316.28	0.05	100.49	2.75	15.86	4.24	1.49	81.63
2	61	0	303.21	25	18	68	14	66	26.4	1.7	4.83	1.23	2.9	0.89	246.2	1.32	253.96	43.59	119.7	17.56	178.31	1316.28	0.05	100.49	2.75	15.86	4.24	1.49	81.63
2	61	0	303.21	40	84	64	20	173	32.2	1	5.23	1.23	2.9	0.8494	33.4	1	253.96	43.59	119.7	17.56	178.31	1316.28	0.05	100.49	2.75	15.86	4.24	1.49	81.63
2	61	2	303.21	18	15	55	49	64	22.7	1.7	4.52	1.25	2.64	0.8	81	1.55	253.96	43.59	119.7	17.56	178.31	1316.28	0.05	100.49	2.75	15.86	4.24	1.49	81.63
2	61	3	167	14	25	72	25	40	32.5	1.3	4.74	1.28	3.27	0.39	220	1.33	177	36	74	9	160	1316.28	0.05	100.49	2.75	15.86	4.24	1.49	81.63
2	61	0	303.21	12	19	69	17	82.51	32.5	1.4	5.11	1.22	3.32	0.77	224.09	1.29	253.96	43.59	119.7	17.56	178.31	358.5	0.01	23.7	2.75	15.86	4.24	1.49	81.63
2	61	2	303.21	10	13	74	14	80	25.4	1.7	5.22	1.23	2.9	0.8494	422.5	1.1	253.96	43.59	119.7	17.56	178.31	1316.28	0.05	100.49	2.75	15.86	4.24	1.49	81.63
2	61	0	181.2	25.06	26.4	81.06	43	82.51	27.01	1.55	5.5	1.23	2.9	0.8494	224.09	1.29	253.96	43.59	119.7	17.56	178.31	1316.28	0.05	100.49	2.07	14.81	4.14	1.45	81.63
1	61	0	479	16.3	26.5	76	23.1	60	32.3	1.5	5.88	1.26	2.62	0.7	76	1.47	134	26.1	130	7	99	50	0.01	41.35	7.4	13.4	5.71	1.93	2.4
2	61	1	303.21	15	22	81.06	12	82.51	27.01	1.55	5.47	1.23	2.9	0.61	224.09	1.29	187	33	110	9	144	1316.28	0.05	100.49	2.75	15.86	4.24	1.49	81.63
2	61	1	303.21	9	14	59	25	64	25	1.5	4.58	1.23	2.9	1.5	199.6	1.26	253.96	43.59	119.7	17.56	178.31	1316.28	0.05	100.49	2.75	15.86	4.24	1.49	81.63
2	61	0	303.21	16	19	72	16	76	29.7	1.5	5.86	1.23	2.9	0.8494	72.8	1.5	253.96	43.59	119.7	17.56	178.31	1316.28	0.05	100.49	2.75	15.86	4.24	1.49	81.63
2	60	1	303.21	25.06	26.4	81.06	43	82.51	27.01	1.55	5.5	1.23	2.9	0.8494	224.09	1.29	253.96	43.59	119.7	17.56	178.31	1316.28	0.05	100.49	2.32	16.8	4.84	1.58	81.63
2	60	3	844.27	6	12	311	21	80	32.8	1.3	7.3	0.82	3.14	0.8494	224.09	1.29	188	36	34	10	158	0	0.06	130.9	2.75	15.86	4.24	1.49	81.63
2	60	2	216	27.5	19.8	51	17.6	67	28.6	1.6	5.05	1.14	2.92	1.01	193	1.47	253.96	43.59	119.7	17.56	178.31	56.9	0	0	1.88	20.8	4.98	1.94	81.63
2	60	3	81.9	37.9	33.8	58	28	57	30.5	1.6	5.3	1.45	2.65	0.87	41	1.46	183	33	58	8	149	91.8	0.01	0	1.47	18.8	5.66	1.79	81.63
2	60	0	303.21	33	30	54	51	53	22.3	2	4.49	1.23	2.9	1.84	42.1	1.2	253.96	43.59	119.7	17.56	178.31	1316.28	0.05	100.49	2.75	15.86	4.24	1.49	81.63
2	60	2	303.21	25	30	62	21	82.51	27.01	1.55	5.48	1.23	2.9	0.8494	224.09	1.29	253.96	43.59	119.7	17.56	178.31	1316.28	0.05	100.49	2.75	15.86	4.24	1.49	81.63
1	60	1	303.21	20	20	82	23	82.51	30.5	1.5	7.58	1.23	2.9	0.8494	224.09	1.29	253.96	43.59	119.7	17.56	178.31	1316.28	0.05	100.49	2.75	15.86	4.24	1.49	81.63
2	60	2	125.2	17.8	19	60	18.5	79	27.8	1.5	5.45	1.6	3.59	1.03	218	1.56	187	36.3	83	11	146	1316.28	0.05	100.49	2.75	15.86	4.24	1.49	81.63
2	60	0	303.21	16	19	62	16	59	34.1	1.2	5.07	1.27	3.89	1.31	224.09	1.29	168	30	52	8	117	1316.28	0.05	100.49	1.32	13.5	4.59	1.48	81.63
2	60	0	384	30.1	26.5	53	11.3	54	31.5	1.3	5.04	1.52	2.48	0.52	104	1.78	169	32.6	65	8	127	184.8	0.01	25.07	2.78	16	5.28	1.98	81.63
1	60	1	156	9.9	15	80	27	87	30.3	1.5	5.74	1.55	4.47	1.37	80	1.59	211	26.5	67	8.5	138	1316.28	0.05	100.49	2.57	18	4.77	1.77	81.63
2	60	1	303.21	25.06	26.4	81.06	43	82.51	27.01	1.55	5.5	1.23	2.9	0.8494	224.09	1.29	253.96	43.59	119.7	17.56	178.31	1316.28	0.05	100.49	0.7	15.67	5.04	2.18	81.63
1	60	1	62.1	33	27	63	47	64	21.8	2.2	6.05	1.23	2.9	0.54	35	1.04	140	21	125	10	100	1316.28	0.05	100.49	1.57	18.3	5.63	1.86	81.63
2	60	0	303.21	26	26	63	18	82.51	27.01	1.55	6.28	1.23	2.9	0.97	224.09	1.29	169	33	160	10	138	1316.28	0.05	100.49	2.75	15.86	4.24	1.49	81.63
2	60	2	172	29	21	62	31	95	27.6	1.7	4.84	1.47	3.06	0.67	33	1.56	168	24	87	5	118	0	0	34.98	3.88	19	4.26	1.7	3.68
2	60	1	197	31	24	47	27	63	26.8	1.7	5.37	1.23	2.9	0.8494	224.09	1.29	253.96	43.59	119.7	17.56	178.31	1316.28	0.05	100.49	2.75	15.86	4.24	1.49	81.63
2	60	2	303.21	11	22	52	14	82.51	27.01	1.55	5.28	1.63	4.15	0.65	224.09	1.29	253.96	43.59	119.7	17.56	178.31	1316.28	0.05	100.49	2.75	15.86	4.24	1.49	81.63
2	60	2	303.21	13	20	71	14	56	33.8	1.3	5.33	1.59	2.5	0.71	37	1.77	253.96	43.59	119.7	17.56	178.31	1316.28	0.05	100.49	2.75	15.86	4.24	1.49	81.63
1	60	1	303.21	23	26	70	17	40	21.3	1.8	5.02	1.23	2.9	0.36	170	1.19	253.96	43.59	119.7	17.56	178.31	1316.28	0.05	100.49	2.75	15.86	4.24	1.49	81.63
2	60	3	303.21	17.2	19	59	37.8	65	27.1	1.5	4.68	1.46	3.69	1.41	32	1.71	253.96	43.59	119.7	17.56	178.31	1316.28	0.05	100.49	2.75	15.86	4.24	1.49	81.63
1	60	3	303.21	67	24	50	28.5	45	27.8	1.3	7.47	0.75	1.77	0.47	289	1.42	273	46.6	558	16	184	145.6	0.01	246.1	0.78	13.4	4.35	1.38	10.3
1	60	2	303.21	24	14	59	13	55	23	1.6	5.29	1.23	2.9	0.8494	224.09	1.29	253.96	43.59	119.7	17.56	178.31	17.6	0.01	444.2	2.75	15.86	4.24	1.49	81.63
2	60	3	303.21	25.06	26.4	81.06	43	82.51	27.01	1.55	5.5	1.23	2.9	0.8494	224.09	1.29	253.96	43.59	119.7	17.56	178.31	1316.28	0.05	100.49	2.75	15.86	4.24	1.49	81.63
2	60	0	303.21	10	18	63	14	86	30.4	1.5	5.11	1.23	2.9	0.98	22.8	1.37	253.96	43.59	119.7	17.56	178.31	1316.28	0.05	100.49	2.75	15.86	4.24	1.49	81.63
2	60	0	303.21	28	29	58	23	95	25.1	1.9	5.83	1.23	2.9	0.77	717.8	1.55	205	42	128	13	167	1316.28	0.05	100.49	2.26	13.52	4.91	1.86	81.63
2	60	2	303.21	13	21	73	8	44	29.3	1.6	4.97	1.48	3.59	0.45	74	1.63	253.96	43.59	119.7	17.56	178.31	1316.28	0.05	100.49	2.75	15.86	4.24	1.49	81.63
1	60	2	303.21	58	24	78	34	54	20.1	1.9	4.03	1.23	2.9	1.02	305	1.69	253.96	43.59	119.7	17.56	178.31	1316.28	0.05	100.49	2.75	15.86	4.24	1.49	2.96
2	60	2	303.21	20.7	21.9	65	25	50	23.4	1.6	4.6	1.4	2.82	1.03	45	1.53	253.96	43.59	119.7	17.56	178.31	1316.28	0.05	100.49	2.75	15.86	4.24	1.49	81.63
2	60	1	303.21	11	18	59	17	69	30.9	1.4	4.56	1.37	2.48	0.42	349	1.39	147	28	68	12	115	91.7	0.01	26.77	2.75	15.86	4.24	1.49	81.63
2	60	2	109	13	15	50	12	51	19.4	2	5.37	1.23	2.9	0.84	695	1.25	226	36	161	10	182	72.2	0.01	21.5	1.44	16.5	5.06	1.67	81.63
2	60	3	303.21	14	24	55	26	53	30	1.4	4.7	1.49	3.48	1.14	147	1.66	253.96	43.59	119.7	17.56	178.31	1316.28	0.05	100.49	2.75	15.86	4.24	1.49	81.63
2	60	2	303.21	10	17	66	11	82.51	27.01	1.55	5.44	1.23	2.9	1.13	224.09	1.29	253.96	43.59	119.7	17.56	178.31	1316.28	0.05	100.49	2.75	15.86	4.24	1.49	81.63
2	60	2	303.21	70	54	58	126	80	25.1	1.5	5.04	0.87	1.84	0.71	35	1.2	253.96	43.59	119.7	17.56	178.31	1316.28	0.05	100.49	2.75	15.86	4.24	1.49	81.63
2	60	2	303.21	25.06	26.4	81.06	43	82.51	27.01	1.55	5.5	1.23	2.9	0.8494	224.09	1.29	253.96	43.59	119.7	17.56	178.31	1316.28	0.05	100.49	2.75	15.86	4.24	1.49	81.63
2	60	0	95.96	14	18	54	36	95	22.5	1.9	5.1	1.23	2.9	0.81	88	1.27	197	25	172	12	146	1316.28	0.05	100.49	3.84	12.51	4.62	1.61	81.63
1	60	3	303.21	16	13	74	21	82.51	27.01	1.55	5.99	1.23	2.9	0.8494	224.09	1.29	253.96	43.59	119.7	17.56	178.31	1316.28	0.05	100.49	2.75	15.86	4.24	1.49	81.63
2	60	1	303.21	25	29	63	26	52	29.5	1.5	5.16	1.54	3.61	0.73	133	1.71	159	32	65	7	139	1316.28	0.05	100.49	1.48	18.05	5.21	1.91	81.63
1	60	1	303.21	19.2	20.7	87	12.4	58	26.3	1.4	4.74	1.22	2.12	0.54	413	1.16	253.96	43.59	119.7	17.56	178.31	1316.28	0.05	100.49	2.75	15.86	4.24	1.49	81.63
2	60	0	303.21	70.2	22.1	47	155.8	75	23.8	1.6	4.7	1.21	3.29	0.77	91	1.45	211	33.9	58	10.9	186	261.4	0	0	2.75	15.86	4.24	1.49	81.63
2	60	1	303.21	14	26	54	13	82.51	27.01	1.55	4.93	1.26	3.23	1.09	224.09	1.29	189	38	78	11	159	1316.28	0.05	100.49	2.75	15.86	4.24	1.49	81.63
2	60	0	303.21	25.7	18.8	52	54.5	93	27.5	1.6	6.99	1.15	4.29	1.49	67	1.33	253.96	43.59	119.7	17.56	178.31	1316.28	0.05	100.49	2.75	15.86	4.24	1.49	4.05
1	60	3	303.21	25	21	79	28	82.51	27.01	1.55	5.34	1.23	2.9	0.8494	224.09	1.29	253.96	43.59	119.7	17.56	178.31	1316.28	0.05	100.49	1.35	19	4.8	1.49	81.63
1	60	1	227	21	14	72	294	78	32.9	1.2	5.15	1.23	4.08	1.36	686	1.42	120	19	44	12	90	148.4	0.01	28.13	1.6	17.6	4.37	1.63	2.26
2	60	0	303.21	44	41	51	30	82.51	27.01	1.55	5.72	1.23	2.9	0.75	224.09	1.29	180	37	131	9	127	1316.28	0.05	100.49	2.75	15.86	4.24	1.49	81.63
2	60	1	303.21	37	23	71	29	82.51	27.01	1.55	5.57	1.23	2.9	0.83	224.09	1.29	207	31	87	13	162	1316.28	0.05	100.49	2.75	15.86	4.24	1.49	81.63
2	60	0	517.6	17	27	69	26	77	20.7	1.5	5.2	1.23	2.9	0.77	23.8	1.1	260	41	139	10	218	90.7	0.01	44.04	2.16	14.45	4.39	1.48	81.63
2	60	2	303.21	25.06	26.4	81.06	43	82.51	27.01	1.55	5.5	1.23	2.9	0.8494	224.09	1.29	253.96	43.59	119.7	17.56	178.31	1316.28	0.05	100.49	2.75	15.86	4.24	1.49	81.63
2	60	0	303.21	15	22	61	14	107	30.5	1.5	5.06	1.23	2.9	0.64	58	1.4	253.96	43.59	119.7	17.56	178.31	1316.28	0.05	100.49	2.75	15.86	4.24	1.49	81.63
2	60	2	303.21	25.06	26.4	81.06	43	82.51	27.01	1.55	5.5	1.23	2.9	0.8494	224.09	1.29	253.96	43.59	119.7	17.56	178.31	1316.28	0.05	100.49	2.75	15.86	4.24	1.49	81.63
1	60	3	303.21	17	17	78	17	64	16.8	2.2	4.93	1.23	2.9	0.72	288.3	1.08	253.96	43.59	119.7	17.56	178.31	1316.28	0.05	100.49	2.75	15.86	4.24	1.49	81.63
1	60	0	303.21	21	22	69	27	63	27.1	1.5	5.33	0.9	2.5	0.63	42	1.17	253.96	43.59	119.7	17.56	178.31	0	0.01	0	1.4	19.6	5.55	1.99	81.63
1	60	1	303.21	21	18	65	74	71	22.9	1.8	4.86	1.23	2.9	0.62	196	1.61	253.96	43.59	119.7	17.56	178.31	1316.28	0.05	100.49	2.75	15.86	4.24	1.49	81.63
1	60	2	303.21	50	34	84	40	82.51	31.5	1.5	5.41	1.23	2.9	0.91	224.09	1.29	253.96	43.59	119.7	17.56	178.31	1316.28	0.05	100.49	2.75	15.86	4.24	1.49	81.63
2	60	2	303.21	25.06	26.4	81.06	43	82.51	27.01	1.55	5.5	1.23	2.9	0.8494	224.09	1.29	253.96	43.59	119.7	17.56	178.31	1316.28	0.05	100.49	2.75	15.86	4.24	1.49	81.63
2	60	2	56	22	16	56	19	62	24.1	1.6	4.85	1.22	2.4	0.3	456	1.32	202	33	31	14	166	172.5	0	0	4.2	16.2	4.6	1.58	7.52
2	59	1	303.21	18	24	57	16	82.51	27.01	1.55	4.76	1.23	2.9	0.8494	224.09	1.29	253.96	43.59	119.7	17.56	178.31	1316.28	0.05	100.49	2.75	15.86	4.24	1.49	81.63
1	59	1	303.21	20	19	92	37	53	30.1	1.6	5.48	1.41	2.66	0.66	21	1.57	148	25	130	10	106	1316.28	0.05	100.49	2.28	16.7	4.15	1.63	81.63
2	59	0	303.21	25.06	26.4	81.06	43	82.51	27.01	1.55	5.5	1.23	2.9	0.8494	224.09	1.29	253.96	43.59	119.7	17.56	178.31	1316.28	0.05	100.49	2.75	15.86	4.24	1.49	81.63
2	59	1	303.21	29	21	59	37.2	97	28.4	1.4	4.2	1.17	1.8	0.33	280	1.22	123	25.8	48	7	89	1316.28	0.05	100.49	2.75	15.86	4.24	1.49	2.38
2	59	2	303.21	25.06	26.4	81.06	43	82.51	27.01	1.55	5.5	1.23	2.9	0.8494	224.09	1.29	253.96	43.59	119.7	17.56	178.31	1316.28	0.05	100.49	2.75	15.86	4.24	1.49	81.63
2	59	2	147.5	17	26	63	20	40	30.9	1.5	5.52	1.23	2.9	0.9	20.7	1.29	253.96	43.59	119.7	17.56	178.31	1316.28	0.05	100.49	1.32	13.63	4.32	1.46	81.63
2	59	2	303.21	25.06	26.4	81.06	43	82.51	27.01	1.55	5.5	1.23	2.9	0.8494	224.09	1.29	253.96	43.59	119.7	17.56	178.31	1316.28	0.05	100.49	2.75	15.86	4.24	1.49	81.63
2	59	1	303.21	13.2	18.1	64	23	85	35.8	1.3	5.96	1.23	2.9	1.79	224.09	1.29	253.96	43.59	119.7	17.56	178.31	1316.28	0.05	100.49	2.75	15.86	4.24	1.49	81.63
2	59	1	303.21	21	18	57	22	52	24.5	1.8	5.01	1.23	2.9	1.35	515.2	1.4	253.96	43.59	119.7	17.56	178.31	1316.28	0.05	100.49	2.75	15.86	4.24	1.49	81.63
2	59	1	303.21	17	20.9	61	14.3	57	30.1	1.6	4.87	1.43	1.89	0.52	210.7	1.37	141	23	58	10	108	1316.28	0.05	100.49	0.12	20.19	4.9	1.61	81.63
2	59	3	104.3	14	24	62	16	63	27.3	1.8	5.28	1.23	2.9	0.65	45.2	1.81	253.96	43.59	119.7	17.56	178.31	1316.28	0.05	100.49	2.18	17.2	4.37	1.38	81.63
1	59	2	303.21	14.9	25.9	76	40.7	71	30.5	1.5	5.93	1.86	2.2	0.56	24	1.96	253.96	43.59	119.7	17.56	178.31	1316.28	0.05	100.49	2.75	15.86	4.24	1.49	81.63
2	59	0	303.21	23	28.2	60	14	82.51	27.3	1.7	5.76	1.23	2.9	0.8494	224.09	1.29	253.96	43.59	119.7	17.56	178.31	1316.28	0.05	100.49	2.75	15.86	4.24	1.49	81.63
2	59	1	303.21	23	24	51	24	66	28.3	1.6	5.67	1.23	2.9	0.86	323.2	1.52	253.96	43.59	119.7	17.56	178.31	1316.28	0.05	100.49	2.75	15.86	4.24	1.49	81.63
2	59	2	594.8	47	29	46	38	259	26.5	1.7	6.14	1.23	2.9	0.8494	394.6	1	258	40	265	10	244	35.4	0.01	40.92	1.63	19.69	3.69	1.28	81.63
2	59	2	303.21	14	19	62	14	71	25.4	1.7	5.14	1.23	2.9	1.36	103.2	1.06	253.96	43.59	75	17.56	178.31	1316.28	0.05	100.49	2.75	15.86	4.24	1.49	81.63
2	59	2	303.21	30.7	25.5	60	27.6	82.51	27.01	1.55	7.51	1.23	2.9	0.8494	224.09	1.29	253.96	43.59	119.7	17.56	178.31	1316.28	0.05	100.49	2.75	15.86	4.24	1.49	81.63
2	59	2	303.21	30	25	65	29	63	24.9	1.6	5.17	0.84	4.14	0.77	699	1.18	152	25	74	12	115	1316.28	0.05	100.49	2.75	15.86	4.24	1.49	81.63
1	59	3	303.21	27	18	76	30.4	79	32	1.3	4.9	1.07	3	0.82	46	1.23	253.96	43.59	119.7	17.56	178.31	1316.28	0.05	100.49	2.75	15.86	4.24	1.49	81.63
1	59	1	114.3	15	28	57	116	82.51	23.1	1.5	9.13	1.23	2.9	0.8494	224.09	1.29	253.96	43.59	119.7	17.56	178.31	201	0.01	38.9	2.75	15.86	4.24	1.49	34.03
2	59	2	303.21	9	23	56	29	82.51	27.01	1.55	5.09	1.23	2.9	0.8494	224.09	1.29	253.96	43.59	119.7	17.56	178.31	1316.28	0.05	100.49	2.75	15.86	4.24	1.49	81.63
2	59	1	303.21	21	21	50	27	71	31.1	1.3	5.24	1.05	3.59	0.87	457	1.37	226	41	59	16	175	1316.28	0.05	100.49	2.75	15.86	4.24	1.49	81.63
2	59	3	303.21	10	14	65	10	82.51	30.4	1.4	5.5	1.23	2.9	0.8494	224.09	1.29	253.96	43.59	119.7	17.56	178.31	39.5	0.01	0	2.75	15.86	4.24	1.49	81.63
2	59	0	303.21	19	41	52	28	172	33.9	1.3	5.55	1.78	3.22	0.47	218	1.74	253.96	43.59	119.7	17.56	178.31	1316.28	0.05	100.49	2.75	15.86	4.24	1.49	81.63
2	59	1	303.21	64.4	38.7	48	152.5	121	23.4	1.8	5.34	1.64	4.11	0.8	71	1.76	253.96	43.59	119.7	17.56	178.31	1316.28	0.05	100.49	2.75	15.86	4.24	1.49	81.63
2	59	0	303.21	9	16	53	9	82.51	27.01	1.55	4.9	1.23	2.9	1.16	224.09	1.29	253.96	43.59	119.7	17.56	178.31	1316.28	0.05	100.49	2.75	15.86	4.24	1.49	81.63
1	59	0	303.21	18.1	21.2	61	29.8	66	23.4	1.6	4.57	0.75	2.48	0.64	682	0.89	123	23.5	43	29	97	76.6	0.01	21.7	2.75	15.86	4.24	1.49	12.45
2	59	1	303.21	29	23	66	39	37	21.6	2.3	5.93	1.23	2.9	0.8494	563.9	1.7	207	40	102	8	178	1316.28	0.05	100.49	2.76	14.61	4.58	1.62	81.63
1	59	2	303.21	15.2	18.6	62	27.8	52	23	2	5.59	1.02	2.58	0.72	47	1.23	253.96	43.59	119.7	17.56	178.31	1316.28	0.05	100.49	2.75	15.86	4.24	1.49	81.63
2	59	2	303.21	25.06	26.4	81.06	43	82.51	27.01	1.55	5.5	1.23	2.9	0.8494	224.09	1.29	253.96	43.59	119.7	17.56	178.31	1316.28	0.05	100.49	2.75	15.86	4.24	1.49	81.63
2	59	0	303.21	29	24	61	24	57	30.2	1.3	5.35	1.23	2.9	0.44	80.1	1.14	253.96	43.59	119.7	17.56	178.31	1316.28	0.05	100.49	2.75	15.86	4.24	1.49	81.63
2	59	2	303.21	25.06	26.4	81.06	43	82.51	27.01	1.55	5.5	1.23	2.9	0.8494	224.09	1.29	253.96	43.59	119.7	17.56	178.31	1316.28	0.05	100.49	2.75	15.86	4.24	1.49	81.63
1	59	1	303.21	68.7	48	74	73.4	82.51	31.4	1.4	6.86	1.29	2.95	0.98	224.09	1.29	253.96	43.59	119.7	17.56	178.31	1316.28	0.05	100.49	2.75	15.86	4.24	1.49	81.63
2	59	1	303.21	12.6	18.3	75	19	110	28	1.4	4.76	1	2.5	0.93	728	1.25	253.96	43.59	119.7	17.56	178.31	113.7	0.01	41.95	0.67	16.3	4.92	1.77	1.7
2	59	2	303.21	11	22	56	20.2	60	28.2	1.5	5.68	1.42	2.71	0.4	52	1.51	253.96	43.59	119.7	17.56	178.31	1316.28	0.05	100.49	2.75	15.86	4.24	1.49	81.63
1	59	2	303.21	10	14	70	16	52	21.3	1.9	4.28	0.96	1.77	0.42	10	1.12	253.96	43.59	119.7	17.56	178.31	1316.28	0.05	100.49	2.75	15.86	4.24	1.49	81.63
1	59	2	303.21	41	21	74	59	61	25.6	1.7	6.14	1	3.57	1.19	212	1.28	253.96	43.59	119.7	17.56	178.31	1316.28	0.05	100.49	2.75	15.86	4.24	1.49	81.63
2	59	0	303.21	16.8	18.9	58	15	76	25.4	1.7	5.01	1.59	2.87	0.7	309	1.64	253.96	43.59	119.7	17.56	178.31	1316.28	0.05	100.49	2.92	13.4	4.53	1.9	81.63
2	59	1	303.21	25.06	26.4	81.06	43	82.51	27.01	1.55	5.5	1.23	2.9	0.8494	224.09	1.29	253.96	43.59	119.7	17.56	178.31	1316.28	0.05	100.49	2.75	15.86	4.24	1.49	81.63
2	59	1	303.21	25.06	26.4	81.06	43	82.51	27.01	1.55	5.5	1.23	2.9	0.8494	224.09	1.29	253.96	43.59	119.7	17.56	178.31	1316.28	0.05	100.49	2.75	15.86	4.24	1.49	81.63
2	59	2	206.6	37	40	45	41	129	35.7	1.1	7.22	1.23	2.9	0.75	178.3	1.31	126	25	39	11	96	1316.28	0.05	100.49	5.39	12.73	4.32	1.6	81.63
1	59	0	259	17.7	20.1	77	21.4	105	29.8	1.5	5	1.2	2.67	0.7	40	1.46	156	28.7	90	6	122	10.8	0.01	24.3	2.44	16.9	4.88	1.47	2.55
1	59	0	303.21	12	19	98	7.2	55	23.5	1.8	4.92	1.64	2.89	0.56	600	1.71	253.96	43.59	119.7	17.56	178.31	1316.28	0.05	100.49	4.36	17	4.5	1.25	81.63
1	59	2	303.21	45	32	63	25	85	32.5	1.4	6.14	1.23	2.9	1.1	51.9	1.1	253.96	43.59	119.7	17.56	178.31	1316.28	0.05	100.49	2.75	15.86	4.24	1.49	81.63
2	59	2	303.21	13	15	59	12	82.51	27.01	1.55	5.41	1.23	2.9	0.6	224.09	1.29	164	32	89	13	131	1316.28	0.05	100.49	2.75	15.86	4.24	1.49	81.63
1	59	2	603.5	20.5	18.8	84	24.1	59	22.1	2.1	5.43	1.17	4.38	1.45	96	1.3	139	22	128	3	101	1316.28	0.05	100.49	2.75	15.86	4.24	1.49	81.63
2	59	0	303.21	17	25	53	31	55	27.6	1.5	4.3	1.54	4.29	0.91	195	1.6	253.96	43.59	119.7	17.56	178.31	1316.28	0.05	100.49	2.75	15.86	4.24	1.49	81.63
1	59	2	303.21	19	17	87	20	82.51	22.1	2.1	6.17	1.23	2.9	0.8494	224.09	1.29	253.96	43.59	119.7	17.56	178.31	1316.28	0.05	100.49	2.75	15.86	4.24	1.49	81.63
2	59	2	303.21	17	27	68	86	165	30	1.3	5.67	1.23	2.9	1.4	22.7	1.2	183	32	32	14	136	5.5	0	0	2.75	15.86	4.24	1.49	14.3
1	59	2	303.21	21	19	170	22	54	24.4	1.6	5.3	1.23	2.9	0.8494	224.09	1.29	253.96	43.59	119.7	17.56	178.31	150.1	0.02	56.32	2.75	15.86	4.24	1.49	4.27
2	59	1	303.21	25.06	26.4	81.06	43	82.51	27.01	1.55	5.5	1.23	2.9	0.8494	224.09	1.29	253.96	43.59	119.7	17.56	178.31	1316.28	0.05	100.49	2.75	15.86	4.24	1.49	81.63
2	59	0	303.21	19	28	81	33	82.51	27.01	1.55	6.59	1.23	2.9	0.49	224.09	1.29	253.96	43.59	119.7	17.56	178.31	1316.28	0.05	100.49	2.75	15.86	4.24	1.49	81.63
2	59	0	303.21	52	37	71	53	82.51	27.01	1.55	9.72	1.23	2.9	1.18	224.09	1.29	204	28	70	15	148	1316.28	0.05	100.49	2.75	15.86	4.24	1.49	81.63
2	59	2	303.21	16	18	54	16	66	27	1.7	5.58	1.21	3.55	0.98	78	1.33	253.96	43.59	119.7	17.56	178.31	1316.28	0.05	100.49	2.75	15.86	4.24	1.49	81.63
2	59	1	303.21	22	27	62	28	82.51	27.01	1.55	5.13	1.23	2.9	1.15	224.09	1.29	253.96	43.59	119.7	17.56	178.31	1316.28	0.05	100.49	2.75	15.86	4.24	1.49	81.63
2	59	2	303.21	25.06	26.4	81.06	43	82.51	27.01	1.55	5.28	1.23	2.9	0.98	224.09	1.29	253.96	43.59	119.7	17.56	178.31	1316.28	0.05	100.49	2.75	15.86	4.24	1.49	81.63
2	59	1	303.21	25.06	26.4	81.06	43	82.51	27.01	1.55	5.5	1.23	2.9	0.8494	224.09	1.29	253.96	43.59	119.7	17.56	178.31	1316.28	0.05	100.49	2.75	15.86	4.24	1.49	81.63
1	59	1	303.21	16	17	49	16	52	26.2	1.4	5.39	1.01	2.12	0.47	520	1.3	253.96	43.59	119.7	17.56	178.31	47.4	0.05	100.49	2.75	15.86	4.24	1.49	81.63
1	58	3	303.21	53	28	72	30	82.51	27.01	1.55	4.81	1.23	2.9	0.8494	224.09	1.29	253.96	43.59	119.7	17.56	178.31	1316.28	0.05	100.49	2.75	15.86	4.24	1.49	81.63
2	58	3	113	22	19	61	25	109	26.7	1.8	5.47	1.23	2.9	1.3	224.5	1.91	174	23	76	6	145	1316.28	0.05	100.49	0.58	20.3	5.11	1.76	81.63
2	58	3	303.21	4	12	48	11	42	20.1	1.8	5.43	1.23	2.9	0.83	476.1	1.41	253.96	43.59	119.7	17.56	178.31	1316.28	0.05	100.49	0.07	13.82	5.29	1.89	81.63
2	58	0	303.21	24	26	58	17	82.51	27.01	1.55	5.37	1.23	2.9	1.21	224.09	1.29	253.96	43.59	119.7	17.56	178.31	1316.28	0.05	100.49	1.14	17.41	5.12	1.91	81.63
1	58	1	303.21	18	18	59	29	82.51	27.01	1.55	6.37	0.92	3	1.12	224.09	1.29	253.96	43.59	119.7	17.56	178.31	1316.28	0.05	100.49	2.75	15.86	4.24	1.49	81.63
1	58	1	303.21	32	25	66	43	82.51	27.01	1.55	6.5	1.23	2.9	0.8494	224.09	1.29	192	43	130	7	153	49.2	0.01	41.1	2.75	15.86	4.24	1.49	11.63
1	58	0	303.21	31	33	74	25	52	26.4	1.8	5.46	1.38	4.48	1.2	233	1.59	253.96	43.59	119.7	17.56	178.31	1316.28	0.05	100.49	2.75	15.86	4.24	1.49	81.63
2	58	3	94.5	18.8	23.6	65	54.8	77	30.6	1.5	5.17	1.04	3.06	0.77	565	1.25	213	41.6	57	9	162	1316.28	0.05	100.49	2.75	15.86	4.24	1.49	81.63
2	58	2	303.21	24	28	59	26	82.51	27.01	1.55	5.13	1.23	2.9	0.82	224.09	1.29	253.96	43.59	119.7	17.56	178.31	1316.28	0.05	100.49	2.75	15.86	4.24	1.49	81.63
2	58	1	303.21	14	19	59	16	50	22	1.9	5.25	1.23	2.9	0.8494	78.2	1	253.96	43.59	119.7	17.56	178.31	1316.28	0.05	100.49	2.75	15.86	4.24	1.49	81.63
2	58	1	303.21	9	19	49	15	58	31.7	1.5	5.36	1.23	2.9	1.8	189.2	1.42	253.96	43.59	119.7	17.56	178.31	1316.28	0.05	100.49	2.75	15.86	4.24	1.49	81.63
1	58	2	303.21	16	10	83	43	82.51	27.01	1.55	5.67	1.23	2.9	0.8494	224.09	1.29	141	17	72	8	113	470.7	0.01	0	2.75	15.86	4.24	1.49	81.63
2	58	0	303.21	12	18	56	16	56	31.5	1.4	5.42	1.63	4.25	0.68	80	1.66	253.96	43.59	119.7	17.56	178.31	1316.28	0.05	100.49	2.75	15.86	4.24	1.49	81.63
1	58	0	303.21	56	34	76	41	77	21.9	2	9.65	1.23	2.9	1.14	59	1.11	168	26	59	10	122	1316.28	0.05	100.49	2.75	15.86	4.24	1.49	81.63
2	58	2	93.6	14	24	58	10	103	23.9	1.9	5.07	1.23	2.9	0.33	508	1.72	253.96	43.59	119.7	17.56	178.31	49.3	0	25.52	1.69	18	4.95	1.42	81.63
2	58	2	303.21	19	33	54	22	46	22.9	1.5	4.5	1.23	2.9	0.8494	123.3	1	149	30	89	17	112	43.4	0	29.56	2.75	15.86	4.24	1.49	81.63
2	58	0	303.21	48	29	59	35	61	29	1.6	5.4	1.56	2.05	0.37	45	1.78	253.96	43.59	119.7	17.56	178.31	1316.28	0.05	100.49	2.75	15.86	4.24	1.49	81.63
1	58	2	303.21	18	17	67	18.7	67	26.3	1.8	5.14	1.65	3.29	0.9	646	1.79	253.96	43.59	119.7	17.56	178.31	1316.28	0.05	100.49	2.75	15.86	4.24	1.49	81.63
1	58	2	303.21	25	19	61	33	59	28.6	1.6	6.2	1.11	4.07	1.68	39	1.43	253.96	43.59	119.7	17.56	178.31	1316.28	0.05	100.49	2.75	15.86	4.24	1.49	81.63
1	58	0	303.21	11	14	63	15.6	51	26.1	1.7	5.23	1.18	3.2	1.06	269	1.47	253.96	43.59	119.7	17.56	178.31	1316.28	0.05	100.49	2.75	15.86	4.24	1.49	81.63
2	58	3	303.21	14	18	46	28	82.51	27.01	1.55	6.33	1.23	2.9	0.8494	224.09	1.29	253.96	43.59	119.7	17.56	178.31	1316.28	0.05	100.49	2.75	15.86	4.24	1.49	81.63
2	58	2	303.21	11	14	52	9.8	62	21.5	2	6.06	1.45	2.67	0.56	94	1.69	253.96	43.59	119.7	17.56	178.31	1316.28	0.05	100.49	2.75	15.86	4.24	1.49	81.63
1	58	2	303.21	27	19	86	19.2	66	24.5	1.6	5.61	1.09	3.13	0.96	95	1.32	253.96	43.59	119.7	17.56	178.31	1316.28	0.05	100.49	2.75	15.86	4.24	1.49	81.63
1	58	1	303.21	36	25	97	45	80	22.7	1.8	3.67	1.23	2.9	1.04	211.8	0.93	253.96	43.59	119.7	17.56	178.31	1316.28	0.05	100.49	2.75	15.86	4.24	1.49	81.63
2	58	0	303.21	15	24	63	17	78	28.1	1.6	5.14	1.05	3.64	0.96	72	1.35	253.96	43.59	119.7	17.56	178.31	1316.28	0.05	100.49	2.75	15.86	4.24	1.49	81.63
1	58	2	115	16	16	71	11	44	32.3	1.3	4.59	0.89	2.24	0.38	120	1.09	111	17	23	3	89	191.4	0	26.85	4.09	16.1	4.98	1.8	3.42
2	58	2	303.21	9	13	48	14	32	19.5	1.7	5.15	1.23	2.9	0.35	27.7	1.28	253.96	43.59	119.7	17.56	178.31	1316.28	0.05	100.49	2.75	15.86	4.24	1.49	81.63
2	58	1	303.21	10.9	16.8	51	19.7	68	34.1	1.2	4.95	1.5	3.21	0.99	335	1.73	253.96	43.59	119.7	17.56	178.31	1316.28	0.05	100.49	2.75	15.86	4.24	1.49	81.63
1	58	0	340.5	12	14	70	19	91	25.2	1.5	4.75	1.23	2.9	1.31	170.3	1	136	26	45	5	115	55.6	0.01	0	1.02	14.85	4.81	1.81	81.63
2	58	0	303.21	25.06	26.4	81.06	43	82.51	27.01	1.55	5.5	1.23	2.9	0.8494	224.09	1.29	253.96	43.59	119.7	17.56	178.31	1316.28	0.05	100.49	2.75	15.86	4.24	1.49	81.63
2	58	0	303.21	16	25	65	15	87	31.4	1.4	5.09	1.76	3.31	0.46	446	1.66	253.96	43.59	119.7	17.56	178.31	1316.28	0.05	100.49	2.75	15.86	4.24	1.49	81.63
1	58	0	303.21	18	19	81	22	46	28.1	1.5	5	0.96	1.9	0.73	43	1.26	253.96	43.59	119.7	17.56	178.31	1316.28	0.05	100.49	2.75	15.86	4.24	1.49	81.63
1	58	1	303.21	23.7	15.2	71	35.1	65	23.9	1.9	7.56	0.72	2.67	1.24	148	1.02	253.96	43.59	119.7	17.56	178.31	1316.28	0.05	100.49	2.75	15.86	4.24	1.49	81.63
2	58	1	303.21	23	20	53	76	68	26.7	1.6	5.66	1.23	2.9	1.21	174.4	1.2	141	26	64	9	114	15.2	0	0	2.75	15.86	4.24	1.49	81.63
1	58	3	991.19	17	40	73	122	270	33.2	1	5.16	1.23	2.9	0.92	617	0.73	271	29	21	9	210	1316.28	0.05	100.49	2.73	13.9	3.65	1.94	19.65
2	58	1	303.21	12	23	62	11.6	96	27	1.6	5.33	1.37	3.53	0.64	193	1.49	199	41.5	141	18	155	24.5	0.01	32.93	1.65	18.4	4.84	1.2	81.63
2	58	3	303.21	15	18	91	16	82.51	27	1.6	5.2	1.45	3.68	0.85	224.09	1.29	253.96	43.59	119.7	17.56	178.31	1316.28	0.05	100.49	6.27	13.87	4.26	1.49	81.63
2	58	2	303.21	25.06	26.4	81.06	43	82.51	27.01	1.55	5.5	1.23	2.9	0.8494	224.09	1.29	253.96	43.59	119.7	17.56	178.31	1316.28	0.05	100.49	2.75	15.86	4.24	1.49	81.63
2	58	2	16.18	4	5	48	20	81	25.3	1.2	4.25	1.23	2.9	0.47	29.2	0.64	132	19	32	7	93	453	0.01	31.86	4.2	13.87	4.42	1.36	57.74
2	58	0	303.21	16	21	59	13	82.51	27.01	1.55	4.65	1.23	2.9	1.26	224.09	1.29	253.96	43.59	119.7	17.56	178.31	1316.28	0.05	100.49	2.75	15.86	4.24	1.49	81.63
1	58	1	303.21	16.3	14.7	72	21.9	54	22.6	1.9	5.12	1.13	3.71	1.33	352	1.33	253.96	43.59	119.7	17.56	178.31	1316.28	0.05	100.49	2.75	15.86	4.24	1.49	81.63
1	58	1	303.21	60	46	69	48	82.51	27.01	1.55	5.29	1.23	2.9	0.8494	224.09	1.29	253.96	43.59	119.7	17.56	178.31	1316.28	0.05	100.49	2.75	15.86	4.24	1.49	81.63
2	58	2	303.21	25.06	26.4	81.06	43	82.51	27.01	1.55	5.5	1.23	2.9	0.8494	224.09	1.29	253.96	43.59	119.7	17.56	178.31	1316.28	0.05	100.49	2.75	15.86	4.24	1.49	81.63
2	58	1	0	23	28	60	31	83	24.9	1.8	8.76	1.23	2.9	0.77	32.3	1	267	35	42	14	194	139.9	0.01	0	1.56	16.5	3.17	1.09	13.36
2	58	1	303.21	12	22	75	14	82.51	27.01	1.55	5.29	1.23	2.9	0.66	224.09	1.29	253.96	43.59	119.7	17.56	178.31	1316.28	0.05	100.49	2.75	15.86	4.24	1.49	81.63
2	58	2	303.21	25.06	26.4	81.06	43	82.51	27.01	1.55	5.5	1.23	2.9	0.8494	224.09	1.29	253.96	43.59	119.7	17.56	178.31	1316.28	0.05	100.49	2.75	15.86	4.24	1.49	81.63
2	58	0	303.21	25.06	26.4	81.06	43	82.51	27.01	1.55	5.5	1.23	2.9	0.8494	224.09	1.29	253.96	43.59	119.7	17.56	178.31	1316.28	0.05	100.49	2.75	15.86	4.24	1.49	81.63
1	58	2	303.21	58	29	58	75	78	23.6	1.5	5.9	1.02	4.3	1.06	136	1.13	166	24	360	13	123	141.1	0.01	163.4	2.75	15.86	4.24	1.49	59.59
1	58	0	303.21	18	21	78	29.3	70	24.3	1.7	4.42	1.1	3.13	1.05	85	1.33	253.96	43.59	119.7	17.56	178.31	1316.28	0.05	100.49	2.75	15.86	4.24	1.49	81.63
2	58	1	303.21	3	16	51	10	74	24	2.1	5.07	1.23	2.9	0.8494	87.1	1.4	144	34	42	8	126	52.6	0	0	2.75	15.86	4.24	1.49	81.63
2	58	0	303.21	10.8	17.1	47	16.3	68	25.3	1.6	4.23	1.02	2.2	0.65	461	1.29	253.96	43.59	119.7	17.56	178.31	186.3	0.01	0	2.75	15.86	4.24	1.49	81.63
2	57	1	303.21	12	19	60	17	82.51	27.01	1.55	6.72	1.6	2.92	0.66	224.09	1.29	253.96	43.59	119.7	17.56	178.31	1316.28	0.05	100.49	0.89	17.2	4.38	1.7	81.63
1	57	1	303.21	12	20	84	23	49	27.5	1.7	5.37	0.98	2.94	0.9	133	1.28	191	45	136	20	174	1316.28	0.05	100.49	2.75	15.86	4.24	1.49	81.63
1	57	1	841	39.8	24.6	64	67	75	24.5	1.9	6.77	1.39	2.52	1.08	62	1.61	141	24.4	61	11	98	1316.28	0.05	100.49	3.71	17.5	5.07	1.65	81.63
2	57	1	303.21	21	19	62	20	47	24.9	1.7	5.58	1.67	3.6	0.51	159	1.68	167	28	98	7	121	93.7	0.01	23.93	2.75	15.86	4.24	1.49	81.63
1	57	0	303.21	30.4	23.6	74	25.2	96	29.1	1.5	5.27	0.91	3.81	1.75	185	1.21	253.96	43.59	119.7	17.56	178.31	1316.28	0.05	100.49	2.75	15.86	4.24	1.49	81.63
2	57	0	303.21	22	23	62	25	61	18.6	1.8	5.61	1.23	2.9	2.04	224.09	1.29	253.96	43.59	119.7	17.56	178.31	1316.28	0.05	100.49	2.75	15.86	4.24	1.49	81.63
2	57	2	303.21	56	40	66	110	94	31.6	1.5	6.17	1.49	2.27	0.59	22	1.79	253.96	43.59	119.7	17.56	178.31	1316.28	0.05	100.49	2.75	15.86	4.24	1.49	81.63
2	57	0	303.21	14	18.1	73	23.2	75	27.7	1.5	4.56	1.33	2.3	0.74	134	1.45	253.96	43.59	119.7	17.56	178.31	132.8	0	0	2.67	21.4	4.53	1.3	81.63
2	57	1	183	19	21	55	16.2	61	30.4	1.3	5.84	1.23	3.47	0.89	49	1.34	170	24.8	39	9.3	149	50	0.01	0	1.75	16.6	4.7	1.49	4.96
2	57	1	190	20	21	54	33	67	28	1.6	5.27	1.23	2.9	0.44	298	1.53	193	30	83	12	147	190.1	0.01	0	2.75	15.86	4.24	1.49	81.63
2	57	2	303.21	25.06	26.4	81.06	43	82.51	27.01	1.55	5.5	1.23	2.9	0.8494	224.09	1.29	253.96	43.59	119.7	17.56	178.31	1316.28	0.05	100.49	2.75	15.86	4.24	1.49	81.63
2	57	2	303.21	21	20	73	15	82.51	27.01	1.55	5.89	1.52	2.31	0.43	224.09	1.29	253.96	43.59	119.7	17.56	178.31	1316.28	0.05	100.49	2.75	15.86	4.24	1.49	81.63
1	57	2	75.98	21	17	96	23	26	23.1	1.9	4.99	1.23	2.9	0.8494	16.2	1.5	160	34	79	11	147	1316.28	0.05	100.49	2.23	17.98	5.17	1.57	81.63
2	57	3	303.21	14	18	66	13	113	31.7	1.3	4.82	1.23	2.9	0.8	268	1.39	253.96	43.59	119.7	17.56	178.31	1316.28	0.05	100.49	2.75	15.86	4.24	1.49	81.63
1	57	0	489	23	18	68	36.9	104	27.4	1.7	4.91	0.79	2.36	0.86	281	1.09	157	22.3	167	9	107	29.7	0.01	32.62	0.78	18.2	5.33	1.93	2.55
1	57	0	303.21	13.5	18.8	82	20	69	25.8	1.5	4.91	0.99	2.74	1.15	70	1.38	253.96	43.59	119.7	17.56	178.31	1316.28	0.05	100.49	2.75	15.86	4.24	1.49	81.63
2	57	2	303.21	10	18	56	13	82.51	27.01	1.55	5.43	1.3	1.77	0.6	224.09	1.29	146	27	174	7	132	1316.28	0.05	100.49	2.75	15.86	4.24	1.49	81.63
2	57	2	303.21	106	39	53	159	82.51	27.01	1.55	5.17	1.23	2.9	0.8494	224.09	1.29	253.96	43.59	119.7	17.56	178.31	1316.28	0.05	100.49	2.75	15.86	4.24	1.49	81.63
2	57	1	303.21	18	18	44	14	72	28	1.5	5.23	0.99	3.78	1.22	428	1.27	141	22	43	8	97	12.5	0	0	5.94	18.3	4.92	2	81.63
2	57	0	303.21	17	16	52	18	82.51	27.01	1.55	5.94	1.23	2.9	0.8494	224.09	1.29	253.96	43.59	119.7	17.56	178.31	1316.28	0.05	100.49	2.75	15.86	4.24	1.49	81.63
2	57	1	303.21	10.9	16.5	87	16.9	81	31.6	1.4	6.34	1.46	4.29	1.51	2	1.62	253.96	43.59	119.7	17.56	178.31	1316.28	0.05	100.49	2.75	15.86	4.24	1.49	81.63
2	57	0	90.46	14	16	64	14	82.51	27.01	1.55	4.89	1.23	2.9	1.24	224.09	1.29	253.96	43.59	119.7	17.56	178.31	1316.28	0.05	100.49	2.75	15.86	4.24	1.49	81.63
2	57	2	104	15.1	17.6	69	14.4	64	27.6	1.7	5.36	1.23	2.9	0.61	559.3	1.1	136	23	71	6	103	1316.28	0.05	100.49	2.35	15.2	4.2	1.71	81.63
2	57	0	72.5	21	23	58	14	62	26.7	1.7	4.63	1.71	2.29	0.64	440.8	1.81	156	35	78	8	155	1316.28	0.05	100.49	3.36	17.6	5.4	1.51	81.63
2	57	3	303.21	36	32	82	122	73	27.4	1.5	6.13	1.23	2.9	1.1	285	1.59	215	38	88	11	174	1316.28	0.05	100.49	2.75	15.86	4.24	1.49	81.63
2	57	3	137	10	17	92	18	67	17.1	2	6.71	1.23	2.9	0.79	47	1.24	194	38	85	7	161	92.7	0.01	54.36	2.27	14.1	5.16	1.75	81.63
1	57	2	92.25	11	27	61	44	60	27.6	1.7	5.77	1.49	1.68	0.51	235	1.72	214	34	129	14	162	1316.28	0.05	100.49	2.85	15	4.16	1.55	81.63
2	57	2	303.21	34	25	57	60	82	31.9	1.5	4.89	1.42	2.93	0.6	635	1.57	253.96	43.59	119.7	17.56	178.31	1316.28	0.05	100.49	2.75	15.86	4.24	1.49	81.63
1	57	2	303.21	28	21	82	30	57	26.4	1.7	5.44	1.18	4.47	0.94	85	1.4	253.96	43.59	119.7	17.56	178.31	1316.28	0.05	100.49	2.75	15.86	4.24	1.49	81.63
1	57	2	303.21	23.4	20.6	66	29.3	102	27.1	1.6	5.41	1.27	1.89	0.64	44	1.5	253.96	43.59	119.7	17.56	178.31	1316.28	0.05	100.49	2.75	15.86	4.24	1.49	81.63
2	57	3	303.21	4	15	53	11	60	31.9	1.4	5.4	1.23	2.9	0.45	56	1.7	253.96	43.59	119.7	17.56	178.31	1316.28	0.05	100.49	2.75	15.86	4.24	1.49	81.63
1	57	0	303.21	70	115	66	43	82.51	27.01	1.55	7.26	1.23	2.9	0.8494	224.09	1.29	486	64	356	25	292	1316.28	0.05	100.49	2.75	15.86	4.24	1.49	81.63
2	57	2	303.21	25.06	26.4	81.06	43	82.51	27.01	1.55	5.5	1.23	2.9	0.8494	224.09	1.29	253.96	43.59	119.7	17.56	178.31	1316.28	0.05	100.49	2.75	15.86	4.24	1.49	81.63
2	57	3	303.21	53	29	59	65	56	24.5	1.6	4.57	1.23	2.9	0.88	275	1.11	253.96	43.59	119.7	17.56	178.31	1316.28	0.05	100.49	2.75	15.86	4.24	1.49	81.63
2	57	0	303.21	11.9	15.4	57	9.5	54	23.1	1.8	4.99	1.35	2.95	0.69	135	1.51	253.96	43.59	119.7	17.56	178.31	1316.28	0.05	100.49	2.45	18.3	4.81	1.57	81.63
2	57	2	303.21	29	22.7	60	18.4	73	29.5	1.5	5.23	1.66	2	0.41	382	1.8	253.96	43.59	119.7	17.56	178.31	1316.28	0.05	100.49	2.75	15.86	4.24	1.49	81.63
1	57	2	303.21	11	20	70	11	60	26.8	1.7	4.63	1.27	1.73	0.34	26	1.37	253.96	43.59	119.7	17.56	178.31	1316.28	0.05	100.49	2.75	15.86	4.24	1.49	81.63
1	57	2	303.21	21	14	78	25	34	22.9	1.9	4.7	0.95	2.24	0.61	137	1.31	253.96	43.59	119.7	17.56	178.31	1316.28	0.05	100.49	2.75	15.86	4.24	1.49	81.63
2	57	0	150	15	20	59	17	57	26.1	1.5	4.89	1.41	1.82	0.5	437	1.56	152	28	71	10	115	177.6	0.01	24.23	1.33	14.8	4.67	1.34	81.63
1	57	2	303.21	23	19	99	39	61	26.5	1.8	4.77	0.8	3.43	0.69	265	1.12	253.96	43.59	119.7	17.56	178.31	1316.28	0.05	100.49	2.75	15.86	4.24	1.49	81.63
2	57	2	303.21	11.2	13.3	49	16.1	122	20.8	1.7	5.41	1.63	1.94	0.36	377	1.72	207	22.1	185	2.3	140	133.7	0	51.79	2.75	15.86	4.24	1.49	175.1
2	57	3	303.21	24.9	26.2	56	32	82.51	27.01	1.55	5.47	1.5	2.2	1.03	224.09	1.29	213	35.2	120	11.9	146	1316.28	0.05	100.49	2.75	15.86	4.24	1.49	81.63
2	57	0	303.21	11	20	61	10	45	22	1.8	4.47	1.17	2.04	0.38	97	1.33	253.96	43.59	119.7	17.56	178.31	1316.28	0.05	100.49	2.75	15.86	4.24	1.49	81.63
1	57	2	303.21	29	14	70	65	46	24.9	1.5	4.4	0.98	2.72	0.76	430	1.26	253.96	43.59	119.7	17.56	178.31	1316.28	0.05	100.49	2.75	15.86	4.24	1.49	81.63
1	57	1	265.3	50	28	70	18	52	31.9	1.4	4.67	1.23	2.9	0.87	28.2	1.1	153	25	82	29	106	30.5	0.01	0	1.79	13.39	4.43	1.61	81.63
1	57	3	303.21	23	26	69	25	52	31.5	1.5	5.53	1.09	3.24	1.34	88	1.3	253.96	43.59	119.7	17.56	178.31	1316.28	0.05	100.49	2.75	15.86	4.24	1.49	81.63
2	57	0	303.21	17.3	23.3	74	10.3	82.51	20.9	2.2	5.75	1.23	2.9	0.8494	224.09	1.29	253.96	43.59	119.7	17.56	178.31	1316.28	0.05	100.49	2.75	15.86	4.24	1.49	81.63
2	57	0	303.21	25.06	26.4	81.06	43	82.51	27.01	1.55	5.5	1.23	2.9	0.8494	224.09	1.29	253.96	43.59	119.7	17.56	178.31	1316.28	0.05	100.49	2.75	15.86	4.24	1.49	81.63
2	57	0	303.21	25.06	26.4	81.06	43	82.51	27.01	1.55	5.5	1.23	2.9	0.8494	224.09	1.29	253.96	43.59	119.7	17.56	178.31	1316.28	0.05	100.49	2.75	15.86	4.24	1.49	81.63
2	57	1	303.21	7	17	60	11	82.51	27.01	1.55	4.74	1.23	2.9	0.8494	224.09	1.29	253.96	43.59	119.7	17.56	178.31	1316.28	0.05	100.49	2.75	15.86	4.24	1.49	81.63
2	57	2	303.21	25.06	26.4	81.06	43	82.51	27.01	1.55	5.5	1.23	2.9	0.8494	224.09	1.29	253.96	43.59	119.7	17.56	178.31	1316.28	0.05	100.49	2.75	15.86	4.24	1.49	81.63
1	57	1	303.21	24	22	66	28	82.51	27.01	1.55	5.92	1.23	2.9	0.8494	224.09	1.29	253.96	43.59	119.7	17.56	178.31	1316.28	0.05	100.49	2.75	15.86	4.24	1.49	81.63
2	57	1	33.3	17	25	60	17	79	20.7	2.1	4.34	1.23	2.9	0.58	325.9	1.41	112	17	50	9	96	84.8	0.01	0	2.71	15.5	4.05	1.3	3.37
2	57	0	303.21	6	14	66	13	82.51	26.4	1.6	4.86	1.23	2.9	0.94	224.09	1.29	253.96	43.59	119.7	17.56	178.31	1316.28	0.05	100.49	1.39	14.94	4.42	1.78	81.63
2	57	3	303.21	25.06	26.4	81.06	43	82.51	27.01	1.55	5.5	1.23	2.9	0.8494	224.09	1.29	253.96	43.59	119.7	17.56	178.31	1316.28	0.05	100.49	2.75	15.86	4.24	1.49	81.63
2	57	0	303.21	9	16	47	12	56	23.6	1.6	4.24	1.23	2.9	0.56	38.7	1.28	140	34	59	7	119	1316.28	0.05	100.49	2.75	15.86	4.24	1.49	81.63
2	57	3	101.8	25.06	26.4	81.06	43	82.51	27.01	1.55	5.5	1.23	2.9	0.8494	224.09	1.29	253.96	43.59	119.7	17.56	178.31	1316.28	0.05	100.49	2.75	15.86	4.24	1.49	81.63
2	57	1	303.21	58	46	54	28	62	36	1.2	5.35	1.41	2.02	0.47	73	1.62	222	34	96	17	156	1316.28	0.05	100.49	2.75	15.86	4.24	1.49	81.63
2	57	0	303.21	13	25	71	12	82.51	27.01	1.55	5.45	1.23	2.9	0.32	224.09	1.29	253.96	43.59	119.7	17.56	178.31	1316.28	0.05	100.49	2.75	15.86	4.24	1.49	81.63
1	57	2	324.3	13	17	74	21	37	23.7	1.7	4.46	1.23	2.9	0.86	58.7	0.81	253.96	43.59	119.7	17.56	178.31	1316.28	0.05	100.49	5.58	18	5.61	1.67	81.63
1	57	0	303.21	20	20	72	15	89	34.6	1.3	5.21	1.09	3.64	0.91	171	1.33	253.96	43.59	119.7	17.56	178.31	1316.28	0.05	100.49	2.75	15.86	4.24	1.49	81.63
2	57	3	303.21	29	24	53	17	70	32.9	1.4	4.93	1.74	3.3	1.14	332	1.76	253.96	43.59	119.7	17.56	178.31	1316.28	0.05	100.49	2.75	15.86	4.24	1.49	81.63
2	57	1	94.5	18	22	89	12	50	24.8	1.7	4.65	1.29	3.03	0.41	53	1.38	253.96	43.59	119.7	17.56	178.31	1316.28	0.05	100.49	3.51	14.6	3.98	1.37	81.63
1	57	3	303.21	24	23	90	21.5	81	24.5	1.8	5.6	1.26	3.44	0.89	108	1.44	253.96	43.59	119.7	17.56	178.31	1316.28	0.05	100.49	2.75	15.86	4.24	1.49	81.63
2	57	2	89	11	12	49	12	64	29.3	1.2	3.99	1.23	2.9	0.78	325	1.23	124	21	28	6	98	48.5	0	0	1.14	17.9	4.1	1.47	81.63
2	56	1	303.21	11.7	9.9	53	43	82.51	27.01	1.55	5.61	1.23	2.9	0.8494	224.09	1.29	213	38.6	19	5.3	181	471.2	0	0	2.75	15.86	4.24	1.49	81.63
2	56	3	118.2	37.9	27.8	66	38.3	86	28.6	1.5	5.32	0.79	1.87	0.65	65	1.24	184	33.4	112	8	140	1316.28	0.05	100.49	3.58	14.3	5.51	2.09	1.96
2	56	0	303.21	13	14	58	16	73	19.8	1.8	5.02	1.23	2.9	1.15	129.1	1.31	253.96	43.59	119.7	17.56	178.31	1316.28	0.05	100.49	2.75	15.86	4.24	1.49	81.63
2	56	0	303.21	11	19	61	14	82.51	27.01	1.55	4.78	1.23	2.9	0.8494	224.09	1.29	253.96	43.59	119.7	17.56	178.31	1316.28	0.05	100.49	2.75	15.86	4.24	1.49	81.63
2	56	0	303.21	107	38	50	286	111	30.3	1.2	5	1.1	2.48	0.68	420	1.42	253.96	43.59	119.7	17.56	178.31	1316.28	0.05	100.49	2.75	15.86	4.24	1.49	81.63
1	56	2	303.21	31	25	74	27	82.51	24.7	1.9	4.78	1.23	2.9	0.8494	224.09	1.29	253.96	43.59	119.7	17.56	178.31	1316.28	0.05	100.49	2.75	15.86	4.24	1.49	81.63
1	56	1	303.21	21	23	77	20	54	30.1	1.4	5.17	1.38	3.37	0.66	202	1.47	253.96	43.59	119.7	17.56	178.31	1316.28	0.05	100.49	2.75	15.86	4.24	1.49	81.63
2	56	1	106	10	16	56	22	55	32.3	1.4	5.26	1.23	2.9	0.29	126	1.79	253.96	43.59	119.7	17.56	178.31	1316.28	0.05	100.49	1.14	12.4	4.53	1.53	81.63
2	56	0	303.21	18	15	66	13	54	26.6	1.6	5.4	1.23	2.9	0.8494	282.3	1.5	253.96	43.59	119.7	17.56	178.31	1316.28	0.05	100.49	2.75	15.86	4.24	1.49	81.63
1	56	0	303.21	25	19	79	26	80	26.9	1.7	5.54	0.95	2.4	1.04	53	1.24	253.96	43.59	119.7	17.56	178.31	1316.28	0.05	100.49	2.75	15.86	4.24	1.49	81.63
2	56	2	303.21	25	29	69	72	82.51	27.01	1.55	7.04	1.23	2.9	0.8494	224.09	1.29	253.96	43.59	119.7	17.56	178.31	1316.28	0.05	100.49	2.75	15.86	4.24	1.49	81.63
2	56	0	172	23	19	42	36	89	29.3	1.7	7.72	1.44	3.23	1.19	178.2	1.91	154	28	55	8	142	1316.28	0.05	100.49	2.75	15.86	4.24	1.49	81.63
1	56	0	131	14	18	39	46	56	28.8	1.4	6.45	0.71	3.28	1.01	515	0.91	179	30	30	8	134	0	0.01	0	1.84	16	4.71	1.71	6.6
2	56	1	303.21	25.06	26.4	81.06	43	82.51	27.01	1.55	5.5	1.23	2.9	0.8494	224.09	1.29	253.96	43.59	119.7	17.56	178.31	1316.28	0.05	100.49	2.75	15.86	4.24	1.49	81.63
2	56	0	303.21	13	14	53	24	82.51	27.01	1.55	5.66	1.23	2.9	0.8494	224.09	1.29	253.96	43.59	119.7	17.56	178.31	1316.28	0.05	100.49	2.75	15.86	4.24	1.49	81.63
2	56	2	303.21	25.06	26.4	81.06	43	82.51	27.01	1.55	5.5	1.23	2.9	0.8494	224.09	1.29	253.96	43.59	119.7	17.56	178.31	1316.28	0.05	100.49	2.75	15.86	4.24	1.49	81.63
2	56	1	80.8	15	22	46	40	54	29.4	1.5	5.57	1.23	2.9	1.15	69.7	1.31	198	35	44	13	151	26.8	0.01	0	1.81	18.09	4.65	1.36	81.63
2	56	0	303.21	21	19	56	25	116	23.5	2.1	6.39	1.23	2.9	1.07	132	1.01	253.96	43.59	119.7	17.56	178.31	1316.28	0.05	100.49	2.75	15.86	4.24	1.49	81.63
2	56	2	303.21	15.1	21.1	80	11.9	62	33.6	1.3	4.75	1.59	3	1.11	108.4	1.73	199	31.2	103	17.4	146	1316.28	0.05	100.49	0.86	15.2	4.38	1.57	81.63
2	56	1	303.21	25.06	26.4	81.06	43	82.51	27.01	1.55	5.5	1.23	2.9	0.8494	224.09	1.29	253.96	43.59	119.7	17.56	178.31	1316.28	0.05	100.49	2.75	15.86	4.24	1.49	81.63
2	56	2	303.21	10	16	70	13	45	25.9	1.8	4.33	1.23	2.9	0.8494	393.2	1.5	253.96	43.59	119.7	17.56	178.31	1316.28	0.05	100.49	2.75	15.86	4.24	1.49	81.63
1	56	0	303.21	25.06	26.4	81.06	43	82.51	27.01	1.55	5.5	1.23	2.9	0.8494	224.09	1.29	253.96	43.59	119.7	17.56	178.31	1316.28	0.05	100.49	2.75	15.86	4.24	1.49	81.63
2	56	2	303.21	33	22	50	18	82.51	27.01	1.55	5.44	1.23	2.9	1.14	224.09	1.29	253.96	43.59	119.7	17.56	178.31	1316.28	0.05	100.49	2.75	15.86	4.24	1.49	81.63
2	56	2	303.21	12	15	56	11	82.51	27.01	1.55	5.15	1.23	2.9	0.91	224.09	1.29	253.96	43.59	119.7	17.56	178.31	1316.28	0.05	100.49	2.75	15.86	4.24	1.49	81.63
2	56	2	303.21	25.06	26.4	81.06	43	82.51	27.01	1.55	5.5	1.23	2.9	0.8494	224.09	1.29	253.96	43.59	119.7	17.56	178.31	1316.28	0.05	100.49	2.75	15.86	4.24	1.49	81.63
2	56	1	303.21	10	18	70	13	57	29.3	1.4	4.46	1.23	2.9	0.8494	224.09	1.29	253.96	43.59	119.7	17.56	178.31	1316.28	0.05	100.49	2.75	15.86	4.24	1.49	81.63
2	56	2	228	43.3	29.3	56	35.1	60	33.9	1.3	5.52	1.42	4.44	1.54	216.4	1.01	192	23	80	7	145	79.1	0	0	2.44	14.1	3.3	1.23	81.63
1	56	1	303.21	18	17	84	27	61	31.1	1.4	8.12	1.23	2.9	1.22	65.7	1.2	166	28	85	13	145	1316.28	0.05	100.49	2.75	15.86	4.24	1.49	81.63
2	56	0	303.21	11	12	51	105	82.51	27.01	1.55	5.96	1.23	2.9	0.76	224.09	1.29	253.96	43.59	119.7	17.56	178.31	1316.28	0.05	100.49	2.75	15.86	4.24	1.49	81.63
2	56	1	303.21	41.6	27.8	60	48.5	82.51	27.01	1.55	5.88	1.43	2.94	0.8	224.09	1.29	193	34	74	14	137	1316.28	0.05	100.49	4.99	12.18	4.23	1.23	81.63
1	56	2	303.21	27	29	100	31	58	33.5	1.4	5.24	1.13	3.1	0.93	155	1.29	238	45	152	12	193	1316.28	0.05	100.49	2.75	15.86	4.24	1.49	81.63
2	56	0	303.21	35	21	81.06	26	92	25.5	1.9	5.5	1.23	2.9	0.8494	224.09	1.29	253.96	43.59	119.7	17.56	178.31	1316.28	0.05	100.49	2.82	16.49	5.05	1.66	81.63
2	56	3	106	21	20	51	33	68	22.7	2	4.86	1.23	2.9	1.98	179.5	1.16	253.96	43.59	119.7	17.56	178.31	1316.28	0.05	100.49	2.75	15.86	4.24	1.49	81.63
2	56	2	303.21	62	38	54	44	55	32.5	1.4	5.08	1.23	2.9	0.72	268	1.53	253.96	43.59	119.7	17.56	178.31	1316.28	0.05	100.49	2.75	15.86	4.24	1.49	81.63
2	56	0	303.21	20.4	16.9	77	16.6	62	20.5	1.9	4.74	1.44	1.93	0.46	69	1.59	253.96	43.59	119.7	17.56	178.31	1316.28	0.05	100.49	2.75	15.86	4.24	1.49	81.63
2	56	1	303.21	12	17	73	21	82.51	27.01	1.55	4.56	1.23	2.9	0.8	224.09	1.29	129	28	59	9	100	1316.28	0.05	100.49	2.75	15.86	4.24	1.49	81.63
2	56	1	303.21	30	29	69	34	82.51	26.1	1.3	4.28	1.23	2.9	0.8494	224.09	1.29	253.96	43.59	119.7	17.56	178.31	78.3	0.01	0	0.41	13.04	3.42	1.2	81.63
2	56	2	303.21	25.06	26.4	81.06	43	82.51	27.01	1.55	5.7	1.23	2.9	0.8494	224.09	1.29	253.96	43.59	119.7	17.56	178.31	1316.28	0.05	100.49	2.75	15.86	4.24	1.49	81.63
2	56	2	24.6	12	12	52	11	37	27.6	1.4	4.47	1.4	2.15	0.39	8	1.65	253.96	43.59	119.7	17.56	178.31	1316.28	0.05	100.49	6.3	15.2	3.93	1.49	81.63
2	56	1	303.21	61	43	53	98.2	82.51	27.01	1.55	6.2	1.23	2.9	0.8494	224.09	1.29	253.96	43.59	119.7	17.56	178.31	1316.28	0.05	100.49	2.75	15.86	4.24	1.49	81.63
2	56	2	77.4	14	19	62	19	80	25.8	1.9	5.95	1.23	2.9	0.92	15.6	1.96	253.96	43.59	119.7	17.56	178.31	1316.28	0.05	100.49	2.75	15.86	4.24	1.49	81.63
1	56	1	303.21	23.3	24.7	75	20.2	62	21.5	1.9	7.03	0.87	2.8	0.92	7	1.01	126	20.6	86	7.7	92	50.1	0	0	2.75	15.86	4.24	1.49	14.33
2	56	1	303.21	13	18.6	58	12.7	75	27.4	1.5	5.16	1.49	3.03	0.8	133	1.52	253.96	43.59	119.7	17.56	178.31	1316.28	0.05	100.49	2.75	15.86	4.24	1.49	81.63
1	56	1	303.21	23	20	77	43	82.51	27.01	1.55	5.88	1.23	2.9	0.8494	224.09	1.29	114	24	117	8	93	1316.28	0.05	100.49	2.75	15.86	4.24	1.49	81.63
2	56	0	277	20.2	21.7	49	18.5	58	28.1	1.3	4.74	0.84	3.08	0.69	601	0.85	185	39.1	102	6	149	102	0	28.14	2.57	17	4.52	2.14	81.63
1	56	1	303.21	10	13	71	15	82.51	27.01	1.55	4.87	1.72	3.89	0.63	224.09	1.29	253.96	43.59	119.7	17.56	178.31	1316.28	0.05	100.49	2.75	15.86	4.24	1.49	81.63
2	56	0	303.21	20	27	57	77	90	24.4	1.6	4.44	0.94	3.93	1.58	51	1.16	253.96	43.59	119.7	17.56	178.31	1316.28	0.05	100.49	2.75	15.86	4.24	1.49	81.63
1	56	2	303.21	28.4	16.2	67	26.9	64	23.2	1.8	5.4	1.23	3.75	1.59	16	1.44	253.96	43.59	119.7	17.56	178.31	1316.28	0.05	100.49	2.75	15.86	4.24	1.49	81.63
2	56	3	303.21	15	17	56	29	60	21.5	1.5	5.73	1.23	2.9	1.38	224.09	1.29	253.96	43.59	119.7	17.56	178.31	1316.28	0.05	100.49	2.75	15.86	4.24	1.49	81.63
2	56	0	303.21	26	39	60	12	53	19.4	2.3	5.19	1.23	2.9	0.68	256	1.45	253.96	43.59	119.7	17.56	178.31	1316.28	0.05	100.49	2.75	15.86	4.24	1.49	81.63
1	56	0	303.21	28	23	67	47	60	27.4	1.7	5.83	1.18	2.21	0.61	169	1.44	253.96	43.59	119.7	17.56	178.31	1316.28	0.05	100.49	2.75	15.86	4.24	1.49	81.63
1	56	2	303.21	25.7	19.7	62	36	66	21.4	1.9	5.46	0.93	2.66	0.99	289	1.13	253.96	43.59	119.7	17.56	178.31	1316.28	0.05	100.49	2.75	15.86	4.24	1.49	81.63
2	56	2	303.21	7	14	47	10	58	25.4	1.5	4.42	0.94	2.1	0.52	374	1.11	253.96	43.59	119.7	17.56	178.31	1316.28	0.05	100.49	2.75	15.86	4.24	1.49	81.63
2	56	0	303.21	29	97	33	4	70	22.8	1.8	4.43	1.23	2.9	0.51	69	1.6	253.96	43.59	119.7	17.56	178.31	1316.28	0.05	100.49	2.75	15.86	4.24	1.49	16.17
2	56	2	303.21	10	15	54	15	78	26.2	1.4	4.44	1.08	1.95	0.35	122	1.26	253.96	43.59	119.7	17.56	178.31	1316.28	0.05	100.49	2.75	15.86	4.24	1.49	81.63
1	56	0	303.21	15.3	18.2	65	32.2	45	21.4	1.9	4.75	1.22	2.28	0.64	76	1.32	253.96	43.59	119.7	17.56	178.31	1316.28	0.05	100.49	2.75	15.86	4.24	1.49	81.63
2	56	2	303.21	12	13	77	15	45	21	1.7	5.68	1.23	2.9	0.8494	224.09	1.29	253.96	43.59	119.7	17.56	178.31	1316.28	0.05	100.49	2.75	15.86	4.24	1.49	81.63
2	56	3	303.21	16.5	23.4	57	16.7	63	34.7	1.3	5	0.81	1.93	0.82	101	1.05	253.96	43.59	119.7	17.56	178.31	1316.28	0.05	100.49	2.75	15.86	4.24	1.49	81.63
2	56	2	303.21	23	29	59	37	75	31.7	1.4	5.27	1.23	2.9	0.8494	224.09	1.29	253.96	43.59	119.7	17.56	178.31	1316.28	0.05	100.49	2.75	15.86	4.24	1.49	81.63
2	56	0	303.21	33	37	48	40	73	25.4	1.6	5.32	1.23	2.9	1.17	144	0.94	253.96	43.59	119.7	17.56	178.31	1316.28	0.05	100.49	2.75	15.86	4.24	1.49	81.63
2	56	0	303.21	25.06	26.4	81.06	43	82.51	27.01	1.55	5.5	1.23	2.9	0.8494	224.09	1.29	253.96	43.59	119.7	17.56	178.31	1316.28	0.05	100.49	2.75	15.86	4.24	1.49	81.63
2	56	1	303.21	13	16	57	17	82.51	27.01	1.55	5.61	1.23	2.9	0.8494	224.09	1.29	253.96	43.59	119.7	17.56	178.31	1316.28	0.05	100.49	4.55	14.33	4.81	1.56	81.63
1	56	1	303.21	18.3	18.8	58	27.5	64	22.5	1.8	4.49	1.16	3.35	0.72	532	1.36	253.96	43.59	119.7	17.56	178.31	1316.28	0.05	100.49	2.75	15.86	4.24	1.49	81.63
1	56	0	303.21	27	22	73	60	56	19.8	1.8	4.39	0.96	3.45	1.33	15	1.27	253.96	43.59	119.7	17.56	178.31	12.3	0.01	23.48	2.08	18.7	4.85	1.42	81.63
1	56	1	303.21	18.5	23.3	61	18.3	82.51	27.01	1.55	4.93	1.2	3.36	1.26	699	1.8	253.96	43.59	119.7	17.56	178.31	1316.28	0.05	100.49	2.75	15.86	4.24	1.49	81.63
2	56	0	303.21	11	25	64	20	82.51	27.01	1.55	5.25	1.23	2.9	1.01	224.09	1.29	253.96	43.59	119.7	17.56	178.31	1316.28	0.05	100.49	2.75	15.86	4.24	1.49	81.63
2	56	2	303.21	19	20	66	11	82.51	27.01	1.55	5.35	1.23	2.9	0.49	224.09	1.29	253.96	43.59	119.7	17.56	178.31	1316.28	0.05	100.49	2.75	15.86	4.24	1.49	1.53
1	56	0	303.21	28	28	81	60	82.51	27.01	1.55	5.16	1.23	2.9	1.01	224.09	1.29	253.96	43.59	119.7	17.56	178.31	1316.28	0.05	100.49	2.75	15.86	4.24	1.49	81.63
2	56	1	303.21	27	24	60	24	63	33.2	1.3	5.62	1.23	2.9	0.8494	224.09	1.29	253.96	43.59	119.7	17.56	178.31	1316.28	0.05	100.49	2.75	15.86	4.24	1.49	81.63
2	56	0	303.21	15	20	57	8	76	23.3	1.8	4.48	1.3	2.12	0.44	164	1.52	253.96	43.59	119.7	17.56	178.31	1316.28	0.05	100.49	2.75	15.86	4.24	1.49	81.63
2	56	0	303.21	25.06	26.4	81.06	43	82.51	27.01	1.55	5.5	1.23	2.9	0.8494	224.09	1.29	253.96	43.59	119.7	17.56	178.31	1316.28	0.05	100.49	2.75	15.86	4.24	1.49	81.63
2	56	3	303.21	17	16	70	14	82.51	27.01	1.55	6.07	1.23	2.9	1.53	224.09	1.29	253.96	43.59	119.7	17.56	178.31	1316.28	0.05	100.49	2.75	15.86	4.24	1.49	81.63
2	56	1	303.21	8	11	45	8	60	19.7	1.9	4.97	1.23	2.9	0.8494	458.2	1	253.96	43.59	119.7	17.56	178.31	1316.28	0.05	100.49	2.75	15.86	4.24	1.49	81.63
2	56	3	303.21	51	37	50	41	82.51	32.6	1.3	6.01	1.23	2.9	0.8494	224.09	1.29	253.96	43.59	119.7	17.56	178.31	47.8	0.01	25.78	2.75	15.86	4.24	1.49	81.63
2	56	2	303.21	16.3	18.3	56	11.2	76	28.2	1.3	4.76	1.05	2.55	1.12	195	1.27	253.96	43.59	119.7	17.56	178.31	1316.28	0.05	100.49	2.75	15.86	4.24	1.49	81.63
2	56	2	303.21	25	22	75	17	82.51	27.01	1.55	5.29	1.23	2.9	1.53	224.09	1.29	253.96	43.59	119.7	17.56	178.31	1316.28	0.05	100.49	2.75	15.86	4.24	1.49	81.63
1	56	3	303.21	16.7	17.7	86	24.8	78	25.3	1.7	5.59	0.85	1.99	0.69	71	1.14	253.96	43.59	119.7	17.56	178.31	1316.28	0.05	100.49	2.75	15.86	4.24	1.49	81.63
2	56	0	303.21	32	26	39	150	82.51	27.01	1.55	5.5	1.23	2.9	1.04	224.09	1.29	253.96	43.59	119.7	17.56	178.31	1316.28	0.05	100.49	3.14	14.7	4.72	1.77	81.63
1	56	3	303.21	27	25	66	27	62	23.1	1.6	5.95	1.23	2.9	0.94	487	0.91	174	28	145	13	139	1316.28	0.05	100.49	2.75	15.86	4.24	1.49	81.63
2	56	0	303.21	18	26.4	58	43	82.51	27.01	1.55	5.21	1.23	2.9	0.8494	224.09	1.29	253.96	43.59	119.7	17.56	178.31	1316.28	0.05	100.49	2.75	15.86	4.24	1.49	81.63
2	56	2	303.21	10	17	58	17	82.51	27.01	1.55	6.53	1.45	4.47	0.8494	224.09	1.29	253.96	43.59	119.7	17.56	178.31	1316.28	0.05	100.49	2.75	15.86	4.24	1.49	81.63
2	56	0	72.62	8	14	72	11	46	30.5	1.3	4.24	1.23	2.9	0.71	175.6	1.29	253.96	43.59	119.7	17.56	178.31	104.6	0	22.71	1.31	13.67	3.79	1.45	81.63
2	56	1	303.21	25.06	26.4	81.06	43	82.51	27.01	1.55	5.5	1.23	2.9	0.8494	224.09	1.29	253.96	43.59	119.7	17.56	178.31	1316.28	0.05	100.49	2.75	15.86	4.24	1.49	81.63
2	56	0	303.21	25.06	26.4	81.06	43	82.51	27.01	1.55	5.5	1.23	2.9	0.8494	224.09	1.29	253.96	43.59	119.7	17.56	178.31	1316.28	0.05	100.49	2.75	15.86	4.24	1.49	81.63
2	56	3	303.21	20	21	53	96	78	23.5	1.7	4.11	1.16	2.89	0.86	94	1.43	253.96	43.59	119.7	17.56	178.31	42.5	0	24.81	2.75	15.86	4.24	1.49	81.63
2	56	1	303.21	25.06	26.4	81.06	43	82.51	27.01	1.55	5.5	1.23	2.9	0.8494	224.09	1.29	253.96	43.59	119.7	17.56	178.31	1316.28	0.05	100.49	2.75	15.86	4.24	1.49	81.63
2	56	3	117	7.4	17	69	20.1	60	29	1.5	5.32	1.76	4.02	0.79	224.09	1.29	253.96	43.59	119.7	17.56	178.31	1316.28	0.05	100.49	2.75	15.86	4.24	1.49	81.63
2	56	0	303.21	25.06	26.4	81.06	43	82.51	27.01	1.55	5.5	1.23	2.9	0.8494	224.09	1.29	253.96	43.59	119.7	17.56	178.31	1316.28	0.05	100.49	2.75	15.86	4.24	1.49	81.63
1	56	0	303.21	21	22	70	24	58	22.4	1.7	4.08	1.23	2.9	0.76	563.6	1.01	253.96	43.59	119.7	17.56	178.31	1316.28	0.05	100.49	2.75	15.86	4.24	1.49	81.63
2	56	2	48.15	16	16	48	43	82.51	27.01	1.55	5.94	1.23	2.9	0.8494	224.09	1.29	157	32	32	9	118	81	0.01	28.01	2.75	15.86	4.24	1.49	81.63
2	56	1	303.21	25.06	26.4	81.06	43	82.51	27.01	1.55	5.5	1.23	2.9	0.8494	224.09	1.29	253.96	43.59	119.7	17.56	178.31	1316.28	0.05	100.49	2.75	15.86	4.24	1.49	81.63
2	55	0	303.21	25.06	26.4	81.06	43	82.51	27.01	1.55	5.5	1.23	2.9	0.8494	224.09	1.29	253.96	43.59	119.7	17.56	178.31	1316.28	0.05	100.49	2.75	15.86	4.24	1.49	81.63
2	55	0	303.21	15	22	70	14	65	28.9	1.5	5.26	1.07	2.4	0.36	26	1.11	253.96	43.59	119.7	17.56	178.31	1316.28	0.05	100.49	2.75	15.86	4.24	1.49	81.63
2	55	0	303.21	27	23	65	15	64	32.1	1.4	5.37	1.23	2.9	0.8494	224.09	1.29	253.96	43.59	119.7	17.56	178.31	1316.28	0.05	100.49	2.75	15.86	4.24	1.49	81.63
1	55	1	303.21	12	11	73	32	82.51	27.01	1.55	6.28	1.23	2.9	0.8494	224.09	1.29	180	30	70	4	144	1316.28	0.05	100.49	2.75	15.86	4.24	1.49	81.63
2	55	2	303.21	23.3	20.1	64	9	82.51	27.01	1.55	8.59	1.23	2.9	0.74	224.09	1.29	145	29.3	52	11.3	123	1316.28	0.05	100.49	2.75	15.86	4.24	1.49	81.63
1	55	0	303.21	17	24	93	43	82.51	27.01	1.55	4.73	1.23	2.9	0.8494	224.09	1.29	173	32	103	10	133	1316.28	0.05	100.49	2.75	15.86	4.24	1.49	81.63
1	55	2	303.21	13	14	70	17	82.51	26.9	1.7	3.8	1.23	2.9	0.8494	224.09	1.29	253.96	43.59	119.7	17.56	178.31	1316.28	0.05	100.49	2.75	15.86	4.24	1.49	81.63
2	55	3	303.21	25.06	26.4	81.06	43	82.51	27.01	1.55	5.5	1.23	2.9	0.8494	224.09	1.29	253.96	43.59	119.7	17.56	178.31	1316.28	0.05	100.49	2.75	15.86	4.24	1.49	81.63
2	55	1	39.08	16	16	55	17	82.51	27.01	1.55	5.14	1.23	2.9	0.8494	224.09	1.29	253.96	43.59	119.7	17.56	178.31	1316.28	0.05	100.49	2.07	12.21	4.49	1.5	81.63
1	55	2	601	21.9	17.7	81	33.5	50	30.7	1.4	4.83	1.07	3.29	1.12	164	1.14	152	24.3	77	9.1	113	0	0	24.27	0.59	15.9	4.21	1.66	2.84
2	55	1	303.21	14	23	60	12	44	27.4	1.5	4.99	1.23	2.9	0.56	224.09	1.29	253.96	43.59	119.7	17.56	178.31	1316.28	0.05	100.49	2.75	15.86	4.24	1.49	81.63
2	55	1	58.4	13	10	55	17	72	25.8	1.5	5.15	1.23	2.9	0.77	99.2	1.08	157	24	113	7	108	8.1	0.01	0	1.78	19.73	5.23	1.7	81.63
1	55	3	303.21	20	25	92	69	52	26.8	1.6	5.87	1.23	2.9	1.83	460	1.75	183	34	173	13	153	1316.28	0.05	100.49	2.75	15.86	4.24	1.49	81.63
2	55	2	303.21	25.06	26.4	81.06	43	82.51	27.01	1.55	5.5	1.23	2.9	0.8494	224.09	1.29	253.96	43.59	119.7	17.56	178.31	1316.28	0.05	100.49	2.75	15.86	4.24	1.49	81.63
2	55	1	303.21	27.6	29.1	61	14.2	53	26	1.7	4.74	1.81	1.97	0.6	292	1.92	253.96	43.59	119.7	17.56	178.31	1316.28	0.05	100.49	2.75	15.86	4.24	1.49	81.63
1	55	0	303.21	11	20	109	21	82.51	27.01	1.55	4.91	1.23	2.9	0.8494	224.09	1.29	253.96	43.59	119.7	17.56	178.31	1316.28	0.05	100.49	2.75	15.86	4.24	1.49	81.63
2	55	1	448.8	103	62	59	45	65	27.7	1.7	5.9	0.92	2.08	0.77	28	1.38	219	33	73	8	147	1316.28	0.05	100.49	3.79	12.42	4.39	1.56	81.63
2	55	0	303.21	25.4	28.4	74	22	82.51	27.01	1.55	4.97	1.41	2.29	0.66	224.09	1.29	187	32.7	117	9	139	1316.28	0.05	100.49	2.65	19.7	4.16	1.2	81.63
2	55	0	303.21	25.06	26.4	81.06	43	82.51	27.01	1.55	5.37	1.26	3.32	1.15	224.09	1.29	253.96	43.59	119.7	17.56	178.31	1316.28	0.05	100.49	1.69	19.5	4.27	1.63	81.63
2	55	1	303.21	12	18	58	18	51	20.1	2.3	5.08	1.23	2.9	0.93	75.6	1.17	211	36	83	6	137	1316.28	0.05	100.49	1.73	16.28	4.07	1.48	81.63
1	55	1	303.21	27	23	84	35	72	24.6	1.8	5.67	1.03	1.78	0.52	406	1.36	143	26	101	17	112	48.8	0.05	100.49	2.75	15.86	4.24	1.49	81.63
1	55	0	303.21	27	27	79	28	82.51	27.2	1.6	5.75	1.23	2.9	0.67	224.09	1.29	199	41	102	18	143	1316.28	0.05	100.49	2.75	15.86	4.24	1.49	81.63
2	55	2	79.8	31.2	22.8	59	71.5	113	24.6	1.7	5.98	1.39	2.05	0.51	10	1.53	176	33.4	83	11	142	45.3	0	24.86	3.5	15.6	5.17	1.8	2.84
2	55	0	303.21	38	26	58	22	82.51	27.1	1.5	4.31	1.23	2.9	0.8494	224.09	1.29	253.96	43.59	119.7	17.56	178.31	1316.28	0.05	100.49	3.28	15.52	4.57	1.42	81.63
2	55	1	303.21	26	20	72	23	82.51	27.01	1.55	5.5	1.23	2.9	0.8494	224.09	1.29	253.96	43.59	119.7	17.56	178.31	1316.28	0.05	100.49	2.75	15.86	4.24	1.49	81.63
1	55	1	303.21	24	19	67	27	56	30.6	1.4	4.58	1.23	2.9	0.8	320	1.19	136	28	67	7	114	19.2	0.01	0	1.24	18.56	4.08	1.36	81.63
2	55	1	303.21	25.06	26.4	81.06	43	82.51	27.01	1.55	5.5	1.23	2.9	0.8494	224.09	1.29	253.96	43.59	119.7	17.56	178.31	1316.28	0.05	100.49	2.75	15.86	4.24	1.49	81.63
1	55	1	303.21	36	27	86	37	56	32.8	1.4	6.65	1.21	3.6	1.62	97	1.54	253.96	43.59	119.7	17.56	178.31	1316.28	0.05	100.49	2.75	15.86	4.24	1.49	81.63
2	55	1	303.21	25.06	26.4	81.06	43	82.51	27.01	1.55	5.5	1.23	2.9	0.8494	224.09	1.29	253.96	43.59	119.7	17.56	178.31	1316.28	0.05	100.49	2.75	15.86	4.24	1.49	81.63
2	55	2	303.21	15	22	62	20	59	23.4	1.8	4.85	1.23	2.9	0.62	232	1.36	253.96	43.59	119.7	17.56	178.31	1316.28	0.05	100.49	0.99	15.1	4.28	1.34	81.63
2	55	1	303.21	12	13.9	58	18.7	88	29.3	1.6	4.48	1.12	3.26	1.08	192	1.4	253.96	43.59	119.7	17.56	178.31	1316.28	0.05	100.49	2.75	15.86	4.24	1.49	81.63
2	55	1	303.21	11	17	48	20	82.51	27.01	1.55	6.09	1.23	2.9	0.8494	224.09	1.29	253.96	43.59	119.7	17.56	178.31	1316.28	0.05	100.49	2.75	15.86	4.24	1.49	81.63
2	55	0	218	21.4	26.3	57	22.6	82.51	26.2	1.7	5.64	1.4	4.28	0.71	224.09	1.29	194	31	411	12	148	1316.28	0.05	100.49	1.66	11.3	4.39	1.86	81.63
1	55	1	303.21	10	14	93	12	52	24.7	1.6	4.45	1.2	2.66	0.67	74	1.44	253.96	43.59	119.7	17.56	178.31	1316.28	0.05	100.49	2.75	15.86	4.24	1.49	81.63
1	55	0	303.21	15	18	109	43	82.51	27.01	1.55	5.5	1.23	2.9	0.8494	224.09	1.29	183	31	125	13	132	1316.28	0.05	100.49	2.75	15.86	4.24	1.49	81.63
2	55	2	303.21	67	38	63	27	82.51	27.01	1.55	5.04	1.23	2.9	1.52	224.09	1.29	253.96	43.59	119.7	17.56	178.31	1316.28	0.05	100.49	2.75	15.86	4.24	1.49	81.63
2	55	2	303.21	18.8	22.2	61	16.4	82.51	27.01	1.55	5.92	1.23	2.9	0.8494	224.09	1.29	253.96	43.59	119.7	17.56	178.31	1316.28	0.05	100.49	2.75	15.86	4.24	1.49	81.63
2	55	0	303.21	19	19	57	16	82.51	27.01	1.55	4.95	1.23	2.9	0.8494	224.09	1.29	253.96	43.59	119.7	17.56	178.31	1316.28	0.05	100.49	2.75	15.86	4.24	1.49	81.63
2	55	1	303.21	24	28	57	10	82.51	27.3	1.6	5.21	1.23	2.9	0.67	224.09	1.29	253.96	43.59	119.7	17.56	178.31	1316.28	0.05	100.49	2.75	15.86	4.24	1.49	81.63
1	55	2	303.21	74	33	95	187	71	27.2	1.6	4.31	1.23	2.9	1.23	39.1	1.15	253.96	43.59	119.7	17.56	178.31	1316.28	0.05	100.49	2.75	15.86	4.24	1.49	81.63
1	55	2	303.21	25.06	26.4	81.06	43	82.51	27.01	1.55	5.5	1.23	2.9	0.8494	224.09	1.29	253.96	43.59	119.7	17.56	178.31	1316.28	0.05	100.49	2.75	15.86	4.24	1.49	81.63
1	55	2	303.21	25.06	26.4	81.06	43	82.51	27.01	1.55	5.5	1.23	2.9	0.8494	224.09	1.29	253.96	43.59	119.7	17.56	178.31	1316.28	0.05	100.49	2.75	15.86	4.24	1.49	81.63
2	55	2	303.21	11	17	68	23	91	24.2	1.8	4.82	1.12	3.78	0.97	214	1.41	253.96	43.59	119.7	17.56	178.31	1316.28	0.05	100.49	2.75	15.86	4.24	1.49	81.63
1	55	0	303.21	16	15	74	14	99	22.1	1.8	4.73	1.26	2.97	0.79	92	1.38	253.96	43.59	119.7	17.56	178.31	1316.28	0.05	100.49	2.75	15.86	4.24	1.49	81.63
2	55	2	303.21	13	21	63	12	76	31.4	1.5	5.56	1.53	3.87	1.21	688.4	1.75	253.96	43.59	119.7	17.56	178.31	1316.28	0.05	100.49	2.75	15.86	4.24	1.49	81.63
2	55	0	303.21	17	19	51	40.1	91	28.6	1.6	5.16	0.93	3.38	1.06	163	1.18	253.96	43.59	119.7	17.56	178.31	1316.28	0.05	100.49	2.75	15.86	4.24	1.49	81.63
2	55	0	303.21	21	13	56	28	82.51	27.01	1.55	5.3	1.23	2.9	0.56	224.09	1.29	253.96	43.59	119.7	17.56	178.31	1316.28	0.05	100.49	2.75	15.86	4.24	1.49	1.75
2	55	1	60.1	20.3	25.3	55	12.8	54	24.8	1.7	4.85	1.13	3.13	0.57	355	1.23	142	24.2	40	8.5	122	102	0	32.33	1	17.9	4.09	1.63	2.28
2	55	1	303.21	17	22	71	9	82.51	27.01	1.55	4.45	1.41	2.45	0.28	224.09	1.29	253.96	43.59	119.7	17.56	178.31	1316.28	0.05	100.49	2.75	15.86	4.24	1.49	81.63
1	55	0	303.21	31	19	79	27.5	56	21.6	1.8	4.77	1.36	2.05	0.67	20	1.64	253.96	43.59	119.7	17.56	178.31	1316.28	0.05	100.49	2.75	15.86	4.24	1.49	81.63
1	55	2	303.21	36	21	68	126	78	23	2	5.64	0.81	3.24	0.95	95	1.18	253.96	43.59	119.7	17.56	178.31	1316.28	0.05	100.49	2.75	15.86	4.24	1.49	81.63
2	55	3	303.21	23	24	51	25.6	104	26.9	1.8	5.14	1.53	1.46	0.46	255	1.85	253.96	43.59	119.7	17.56	178.31	1316.28	0.05	100.49	2.75	15.86	4.24	1.49	81.63
1	55	2	303.21	30.7	26.8	65	19.9	48	25	1.5	5.5	1.23	2.9	0.8494	224.09	1.29	253.96	43.59	119.7	17.56	178.31	72.8	0.01	31.76	2.75	15.86	4.24	1.49	10.95
2	55	0	303.21	17	22	68	10	71	28.1	1.6	5.13	1.23	2.9	0.8494	224.09	1.29	253.96	43.59	119.7	17.56	178.31	1316.28	0.05	100.49	2.75	15.86	4.24	1.49	81.63
2	55	2	303.21	25.06	26.4	81.06	43	82.51	27.01	1.55	5.5	1.23	2.9	0.8494	224.09	1.29	253.96	43.59	119.7	17.56	178.31	1316.28	0.05	100.49	2.75	15.86	4.24	1.49	81.63
1	55	0	315	10	14	76	13	67	27.3	1.5	7.84	1.23	2.9	0.91	195.7	0.98	194	28	109	11	128	51.8	0.01	0	1.05	17.2	4.18	1.31	81.63
2	55	1	303.21	16	23	63	19.1	61	29.3	1.5	4.88	1.52	2.92	0.7	266	1.61	253.96	43.59	119.7	17.56	178.31	1316.28	0.05	100.49	2.75	15.86	4.24	1.49	81.63
2	55	1	303.21	9.5	19.6	60	11.7	82.51	27.01	1.55	5.07	1.8	3.75	0.67	224.09	1.29	253.96	43.59	119.7	17.56	178.31	1316.28	0.05	100.49	2.75	15.86	4.24	1.49	81.63
2	55	0	303.21	124	73	57	43	82.51	27.01	1.55	5.5	1.23	2.9	0.8494	224.09	1.29	227	32	89	9	160	1316.28	0.05	100.49	2.75	15.86	4.24	1.49	81.63
1	55	2	303.21	30	25	62	56.7	57	32.7	1.4	6.57	1.54	2.87	0.94	75	1.61	253.96	43.59	119.7	17.56	178.31	1316.28	0.05	100.49	2.75	15.86	4.24	1.49	81.63
1	55	0	303.21	25	34	84	18	70	33.8	1.3	4.72	1.77	3.14	0.68	113	1.89	253.96	43.59	119.7	17.56	178.31	1316.28	0.05	100.49	2.75	15.86	4.24	1.49	81.63
2	55	3	303.21	7	20	58	12	82.51	27.01	1.55	4.69	1.23	2.9	0.7	224.09	1.29	253.96	43.59	119.7	17.56	178.31	1316.28	0.05	100.49	2.75	15.86	4.24	1.49	81.63
2	55	0	303.21	25.06	26.4	81.06	43	82.51	27.01	1.55	5.5	1.23	2.9	0.8494	224.09	1.29	253.96	43.59	119.7	17.56	178.31	1316.28	0.05	100.49	2.75	15.86	4.24	1.49	81.63
2	55	2	84.4	22	19	58	20	52	23.3	1.8	4.37	1.17	2.71	0.68	340	1.33	124	21	42	7	88	14.3	0	25.04	1.25	17.1	4.74	1.45	3.13
2	55	0	81.02	17.4	19.9	55	31.3	79	28.5	1.7	5.38	1.23	2.9	0.47	51	1.79	260	56	104	10	197	1316.28	0.05	100.49	2.88	15.23	4.07	1.48	81.63
2	55	0	303.21	24	16	66	42	82.51	27.01	1.55	5.3	1.23	2.9	1.54	224.09	1.29	253.96	43.59	119.7	17.56	178.31	1316.28	0.05	100.49	2.75	15.86	4.24	1.49	81.63
2	55	2	303.21	27	22	57	23	81	31.7	1.3	4.81	1.23	2.9	0.58	63.9	1.23	187	42	75	9	152	1316.28	0.05	100.49	1.55	15.09	5.2	1.92	81.63
1	55	3	303.21	34	14	76	42	82	22	2	4.72	1.23	2.9	1.01	253.3	0.89	253.96	43.59	119.7	17.56	178.31	1316.28	0.05	100.49	2.75	15.86	4.24	1.49	81.63
1	55	2	303.21	124	90	64	73.1	80	25.2	1.5	5.64	1.05	3.63	0.84	224.09	1.29	253.96	43.59	119.7	17.56	178.31	1316.28	0.05	100.49	2.75	15.86	4.24	1.49	81.63
2	55	0	303.21	25.06	26.4	81.06	43	82.51	27.01	1.55	5.5	1.23	2.9	0.8494	224.09	1.29	253.96	43.59	119.7	17.56	178.31	1316.28	0.05	100.49	2.75	15.86	4.24	1.49	81.63
2	55	1	303.21	14	15	53	16	82.51	26.5	1.8	5.78	1.23	2.9	0.8494	224.09	1.29	253.96	43.59	119.7	17.56	178.31	1316.28	0.05	100.49	2.75	15.86	4.24	1.49	81.63
2	55	1	303.21	30	34	60	36	66	31.8	1.4	6.6	1.23	2.9	0.8494	224.09	1.29	199	29	102	13	171	1316.28	0.05	100.49	2.75	15.86	4.24	1.49	81.63
2	55	1	303.21	16	17	47	20	72	32.9	1.3	5.52	1.45	3.47	1.06	103	1.58	175	27	93	10	138	1316.28	0.05	100.49	2.75	15.86	4.24	1.49	81.63
2	55	2	303.21	14	16	62	13	54	30.2	1.4	4.85	1.23	2.9	1.11	109.1	1.98	253.96	43.59	119.7	17.56	178.31	1316.28	0.05	100.49	2.75	15.86	4.24	1.49	81.63
2	55	2	303.21	12	18	67	10	82.51	23.6	1.6	4.76	1.23	2.9	0.8494	224.09	1.29	253.96	43.59	119.7	17.56	178.31	1316.28	0.05	100.49	0.01	18.8	5.03	1.88	81.63
2	55	1	303.21	19	25	76	23	82.51	27.01	1.55	4.63	1.23	2.9	0.92	224.09	1.29	253.96	43.59	119.7	17.56	178.31	1316.28	0.05	100.49	2.75	15.86	4.24	1.49	81.63
2	55	2	303.21	17	18	61	15	82.51	27.01	1.55	5.03	1.39	3.72	0.88	224.09	1.29	253.96	43.59	119.7	17.56	178.31	1316.28	0.05	100.49	2.75	15.86	4.24	1.49	81.63
2	54	2	303.21	11	17	74	13	111	37.6	1.2	5.24	1.68	1.97	0.54	407	1.49	158	28	87	9	126	1316.28	0.05	100.49	3.77	17.1	4.56	2.29	81.63
1	54	0	303.21	30	29	60	25	49	22.8	1.9	5.49	0.94	3.37	0.84	314	1.24	253.96	43.59	119.7	17.56	178.31	1316.28	0.05	100.49	2.75	15.86	4.24	1.49	81.63
2	54	0	303.21	32	36	76	82	88	25.8	1.4	6.24	1.23	2.9	0.52	8.4	1.18	207	25	57	9	146	1316.28	0.05	100.49	2.75	15.86	4.24	1.49	77.95
2	54	1	9.13	12	18	71	8	37	27.7	1.8	4.62	1.23	2.9	0.44	52.5	2.01	148	27	128	6	109	42.6	0	0	2.14	15.44	4.94	1.79	81.63
2	54	1	249	18	36	62	30	72	27.9	1.5	5.48	1.23	2.9	1.04	332	1.57	237	38	157	27	185	1316.28	0.05	100.49	2.75	15.86	4.24	1.49	81.63
2	54	2	38.9	42	26	62	21.5	72	28.4	1.6	6.32	1.69	3.69	0.61	211	1.74	253.96	43.59	119.7	17.56	178.31	1316.28	0.05	100.49	1.52	19	4.33	1.33	81.63
2	54	1	381.2	22.5	23.1	71	18.5	52	30.9	1.4	5.38	1.4	2.65	0.5	108	1.38	177	32.9	98	9	143	1316.28	0.05	100.49	2.23	11.8	3.89	1.33	5.86
1	54	0	303.21	25.8	22.4	86	20.9	58	21.9	2	6.97	1.37	1.36	0.37	64	1.64	253.96	43.59	119.7	17.56	178.31	1316.28	0.05	100.49	2.75	15.86	4.24	1.49	81.63
2	54	1	303.21	12	13	61	14	82.51	27.01	1.55	6.03	1.23	2.9	0.83	224.09	1.29	253.96	43.59	119.7	17.56	178.31	1316.28	0.05	100.49	4.72	13.44	4.36	1.55	81.63
2	54	3	303.21	24	30	46	15.4	51	28.3	1.4	5.84	1.23	2.9	0.43	240	1.53	253.96	43.59	119.7	17.56	178.31	1316.28	0.05	100.49	2.75	15.86	4.24	1.49	81.63
2	54	2	112	23.4	27.6	56	13.8	85	30.8	1.5	4.88	1.74	3.03	0.88	159	1.91	151	25	59	5	128	1316.28	0.05	100.49	3.08	14.6	4.46	1.52	81.63
2	54	1	303.21	6	11	51	12	44	21	2.1	5.88	1.23	2.9	1.21	393.3	1.36	253.96	43.59	119.7	17.56	178.31	1316.28	0.05	100.49	2.97	14.57	4.81	1.73	81.63
2	54	2	70.5	13	18	70	18	39	20.4	2.2	4.14	1.23	2.9	0.91	25.7	1.26	173	29	64	7	139	96.9	0.01	22	1.72	15.2	3.6	0.97	81.63
2	54	1	303.21	20	16	65	27	82.51	27.01	1.55	5.05	1.23	2.9	1.49	224.09	1.29	253.96	43.59	119.7	17.56	178.31	1316.28	0.05	100.49	2.75	15.86	4.24	1.49	81.63
1	54	3	303.21	20.1	19.7	63	26	56	22.1	1.9	4.87	0.91	2.73	1.09	454	1.11	253.96	43.59	119.7	17.56	178.31	1316.28	0.05	100.49	2.75	15.86	4.24	1.49	81.63
2	54	1	303.21	15	20	81.06	43	82.51	27.01	1.55	5.5	1.23	2.9	0.8494	224.09	1.29	124	25	33	6	103	1316.28	0.05	100.49	2.75	15.86	4.24	1.49	81.63
1	54	1	1113	41	39	62	84	100	37.7	1.2	5.91	1.23	2.9	0.96	162.4	0.72	169	25	307	18	107	103.3	0.01	74.08	1.59	15.54	3.26	1.16	21.49
2	54	0	303.21	20	19	55	22	82.51	27.01	1.55	5.15	1.23	2.9	0.8494	224.09	1.29	253.96	43.59	119.7	17.56	178.31	1316.28	0.05	100.49	2.75	15.86	4.24	1.49	81.63
2	54	0	303.21	24	20	63	22	82.51	27.01	1.55	5	1.23	2.9	0.89	224.09	1.29	170	27	71	7	137	1316.28	0.05	100.49	2.61	15	4.15	1.14	81.63
2	54	2	303.21	20	23	64	33	70	21.8	2.1	9.42	1.23	2.9	1.07	17.9	1.25	193	34	60	10	144	1316.28	0.05	100.49	1.53	15.2	4.27	1.49	81.63
1	54	2	303.21	25.06	26.4	81.06	43	82.51	27.01	1.55	5.5	1.23	2.9	1.01	112	1.38	253.96	43.59	119.7	17.56	178.31	1316.28	0.05	100.49	2.48	16.4	4.79	1.37	81.63
2	54	0	303.21	25.06	26.4	81.06	43	82.51	27.01	1.55	5.5	1.23	2.9	0.8494	224.09	1.29	253.96	43.59	119.7	17.56	178.31	1316.28	0.05	100.49	2.75	15.86	4.24	1.49	81.63
1	54	0	303.21	14	13.9	66	25.7	48	26.1	1.7	5.99	0.92	3.04	1.23	248	1.24	253.96	43.59	119.7	17.56	178.31	1316.28	0.05	100.49	2.31	18.2	4.49	1.09	81.63
1	54	1	163.9	23	18	87	31	101	26.6	1.7	5.33	1.23	2.9	1.82	374.4	1.43	166	32	166	9	127	1316.28	0.05	100.49	0.72	19.45	5.59	1.8	81.63
1	54	1	367	20	17	87	24	60	21.8	2	8.75	0.86	3.5	0.96	618	1.11	146	31	121	13	128	14	0.01	34.53	1.95	15.8	4.85	1.76	81.63
2	54	1	303.21	10	16	60	19	82.51	27.01	1.55	4.65	1.23	2.9	0.8494	224.09	1.29	253.96	43.59	119.7	17.56	178.31	1316.28	0.05	100.49	2.75	15.86	4.24	1.49	81.63
2	54	1	303.21	12	20	80	16	82.51	27.01	1.55	5.61	1.23	2.9	1.05	224.09	1.29	146	29	65	6	112	1316.28	0.05	100.49	2.75	15.86	4.24	1.49	81.63
2	54	1	58.74	21.4	20.8	47	16.4	83	29.7	1.6	4.65	1.88	2.8	0.47	305	1.95	142	25	43	9	137	1316.28	0.05	100.49	1.56	18.4	4.9	1.82	81.63
2	54	0	303.21	25.06	26.4	81.06	43	82.51	27.01	1.55	5.5	1.23	2.9	0.8494	224.09	1.29	253.96	43.59	119.7	17.56	178.31	1316.28	0.05	100.49	2.75	15.86	4.24	1.49	81.63
2	54	2	303.21	9	15	66	11	82.51	27.01	1.55	4.91	1.23	2.9	0.41	224.09	1.29	253.96	43.59	119.7	17.56	178.31	1316.28	0.05	100.49	2.75	15.86	4.24	1.49	81.63
2	54	1	303.21	19	19	58	14	48	36.4	1.3	4.68	1.23	2.9	0.62	296	1.25	253.96	43.59	119.7	17.56	178.31	1316.28	0.05	100.49	2.75	15.86	4.24	1.49	81.63
2	54	3	303.21	25.06	26.4	81.06	43	82.51	27.01	1.55	5.5	1.23	2.9	0.8494	224.09	1.29	253.96	43.59	119.7	17.56	178.31	1316.28	0.05	100.49	2.75	15.86	4.24	1.49	81.63
1	54	2	303.21	17	18	89	48	82.51	27.01	1.55	5.73	0.92	3.8	1.87	224.09	1.29	253.96	43.59	119.7	17.56	178.31	1316.28	0.05	100.49	2.75	15.86	4.24	1.49	81.63
2	54	1	303.21	24	23	58	10	82.51	27.01	1.55	5.43	1.23	2.9	0.8494	224.09	1.29	253.96	43.59	119.7	17.56	178.31	1316.28	0.05	100.49	2.75	15.86	4.24	1.49	81.63
2	54	2	303.21	14.3	15	62	10.5	42	22.8	1.8	4.08	1.24	4.04	0.99	138	1.32	253.96	43.59	119.7	17.56	178.31	1316.28	0.05	100.49	3.17	14.8	4.26	1.36	81.63
2	54	2	303.21	27	25	71	14	42	23.2	1.7	5.56	1.3	3.94	0.78	90	1.38	253.96	43.59	119.7	17.56	178.31	1316.28	0.05	100.49	2.75	15.86	4.24	1.49	81.63
2	54	2	303.21	22	17	59	31	52	25.7	1.5	4.33	1.25	3.77	1.21	95	1.34	253.96	43.59	119.7	17.56	178.31	1316.28	0.05	100.49	1.96	11.9	4.49	1.63	81.63
2	54	1	303.21	25.06	26.4	81.06	43	82.51	27.01	1.55	5.5	1.23	2.9	0.8494	224.09	1.29	253.96	43.59	119.7	17.56	178.31	1316.28	0.05	100.49	2.75	15.86	4.24	1.49	81.63
1	54	3	303.21	17.3	17.5	80	11.9	78	21.6	2.1	4.46	1.25	2.58	0.71	184	1.46	253.96	43.59	119.7	17.56	178.31	1316.28	0.05	100.49	2.75	15.86	4.24	1.49	81.63
2	54	2	303.21	58	35	56	16	82.51	27.01	1.55	5.98	1.23	2.9	0.8494	224.09	1.29	253.96	43.59	119.7	17.56	178.31	1316.28	0.05	100.49	2.75	15.86	4.24	1.49	81.63
2	54	2	303.21	19	20	77	22	53	25.7	1.9	5.06	1.3	3.44	1.08	317	1.48	253.96	43.59	119.7	17.56	178.31	1316.28	0.05	100.49	2.75	15.86	4.24	1.49	81.63
1	54	0	303.21	30	22	92	44	82.51	27.01	1.55	5.54	1.23	2.9	1.17	224.09	1.29	253.96	43.59	72	17.56	178.31	1316.28	0.05	100.49	1.41	16.1	5	1.89	81.63
2	54	2	303.21	24	27	54	32	37	25.3	1.9	4.94	1.23	2.9	0.86	169.6	1.46	253.96	43.59	119.7	17.56	178.31	1316.28	0.05	100.49	2.4	15.3	4.37	1.56	81.63
2	54	0	303.21	36	34	54	18	103	31.8	1.4	5.44	1.23	2.9	0.8494	224.09	1.29	253.96	43.59	119.7	17.56	178.31	1316.28	0.05	100.49	2.75	15.86	4.24	1.49	81.63
2	54	2	303.21	7	14	44	15	82.51	25.2	1.6	4.84	1.23	2.9	1.01	224.09	1.29	253.96	43.59	119.7	17.56	178.31	1316.28	0.05	100.49	2.75	15.86	4.24	1.49	81.63
2	54	0	303.21	42	36	78	14	60	32.4	1.3	4.87	1.23	2.9	1.27	132.8	1.5	253.96	43.59	119.7	17.56	178.31	1316.28	0.05	100.49	2.75	15.86	4.24	1.49	81.63
2	54	1	303.21	6	20	61	14	83	29.6	1.5	4.52	1.23	2.9	0.68	175.5	1.97	253.96	43.59	119.7	17.56	178.31	1316.28	0.05	100.49	1.6	17.1	4.79	1.37	81.63
2	54	0	303.21	10	20	66	17	82.51	27.01	1.55	4.01	1.23	2.9	0.8494	224.09	1.29	253.96	43.59	119.7	17.56	178.31	1316.28	0.05	100.49	2.75	15.86	4.24	1.49	81.63
2	54	2	303.21	187	72	47	261	48	25.7	1.3	4.4	1.02	2.1	0.39	15	1.25	253.96	43.59	119.7	17.56	178.31	1316.28	0.05	100.49	2.75	15.86	4.24	1.49	81.63
2	54	1	303.21	50	32	55	58	80	28.8	1.3	4.1	1.22	3.64	1.43	678	1.37	253.96	43.59	119.7	17.56	178.31	1316.28	0.05	100.49	2.75	15.86	4.24	1.49	81.63
1	54	2	171	50	27	59	24	73	23.7	1.9	5.25	1.07	2.73	1.22	128	1.4	182	30	99	8	127	68.7	0.01	24.19	0.88	17.6	5.83	1.67	1.79
2	54	2	303.21	12.7	18.8	60	16.1	39	27	1.6	4.83	1.3	2.44	0.7	83	1.44	147	25.7	85	5	108	1316.28	0.05	100.49	2.57	13.1	3.76	1.45	81.63
2	54	0	303.21	13	17	46	14	34	27.2	1.6	5.31	1.4	2.55	0.58	133	1.46	253.96	43.59	119.7	17.56	178.31	1316.28	0.05	100.49	3.31	13	4.41	1.45	81.63
2	54	0	76.67	13	17	58	11	60	23.8	1.5	4.59	1.03	2.18	0.32	6	1.19	253.96	43.59	119.7	17.56	178.31	1316.28	0.05	100.49	2.75	15.86	4.24	1.49	81.63
2	54	2	303.21	16	17	66	19	52	34.3	1.3	4.85	1.23	2.9	1.29	173.4	1.46	253.96	43.59	119.7	17.56	178.31	1316.28	0.05	100.49	2.75	15.86	4.24	1.49	81.63
1	54	3	303.21	14	16	71	16	61	26.5	1.6	5.04	1.13	2.05	0.48	51	1.41	253.96	43.59	119.7	17.56	178.31	1316.28	0.05	100.49	2.75	15.86	4.24	1.49	81.63
1	54	1	303.21	44.6	16.3	85	22.5	66	19.9	1.9	4.53	0.68	2.62	1.07	239	0.94	253.96	43.59	119.7	17.56	178.31	1316.28	0.05	100.49	2.75	15.86	4.24	1.49	81.63
1	54	2	303.21	29	21	72	34	79	26.7	1.8	5.96	1.31	2.99	1.06	378	1.61	253.96	43.59	119.7	17.56	178.31	1316.28	0.05	100.49	2.75	15.86	4.24	1.49	81.63
1	54	1	303.21	32.6	27.6	83	46.9	84	30.3	1.5	5.33	1.15	2.85	0.9	610	1.45	169	34.3	94	8	133	1316.28	0.05	100.49	3.32	15.4	5.38	1.49	81.63
1	54	0	303.21	14	21	74	18	82.51	27.9	1.7	5.12	1.23	2.9	0.8494	224.09	1.29	253.96	43.59	119.7	17.56	178.31	1316.28	0.05	100.49	2.75	15.86	4.24	1.49	81.63
2	54	1	303.21	6	14	53	15	82.51	27.01	1.55	5.17	1.23	2.9	0.71	224.09	1.29	253.96	43.59	119.7	17.56	178.31	1316.28	0.05	100.49	4.61	17.17	3.83	1.2	81.63
2	54	0	303.21	23	19	50	15	94	27.2	1.7	5.7	1.11	3.47	1.06	19	1.38	253.96	43.59	119.7	17.56	178.31	1316.28	0.05	100.49	2.75	15.86	4.24	1.49	81.63
1	54	2	303.21	24	16	72	53	54	23.7	1.6	4.63	1.01	2.58	0.79	149	1.23	253.96	43.59	119.7	17.56	178.31	1316.28	0.05	100.49	2.75	15.86	4.24	1.49	81.63
2	54	0	303.21	25.06	26.4	81.06	43	82.51	27.01	1.55	5.5	1.23	2.9	0.8494	224.09	1.29	253.96	43.59	119.7	17.56	178.31	1316.28	0.05	100.49	1.11	14.2	5.07	1.97	81.63
1	54	1	211	38	26.1	74	53.3	80	31.2	1.5	5.59	1.06	3.54	1.62	14	1.49	253.96	43.59	119.7	17.56	178.31	1316.28	0.05	100.49	2.41	17.1	5.31	1.4	81.63
2	54	0	303.21	25.06	26.4	81.06	43	82.51	27.01	1.55	5.5	1.23	2.9	0.8494	224.09	1.29	253.96	43.59	119.7	17.56	178.31	1316.28	0.05	100.49	2.75	15.86	4.24	1.49	81.63
2	54	0	303.21	14.6	24.8	63	11.2	86	30.1	1.3	4.68	1.59	2.75	0.71	72	1.49	253.96	43.59	119.7	17.56	178.31	1316.28	0.05	100.49	2.75	15.86	4.24	1.49	81.63
1	54	2	59.8	34	35	53	96	117	22.6	1.8	5.31	1.23	2.9	0.6	404	1.09	198	33	113	11	149	32.8	0.01	32.15	1.07	13.8	4.99	1.96	81.63
1	54	1	303.21	24	20	63	26	49	27.1	1.6	5.12	1.64	3.39	0.7	176	1.82	253.96	43.59	119.7	17.56	178.31	1316.28	0.05	100.49	2.75	15.86	4.24	1.49	81.63
2	54	0	303.21	28	36	81.06	43	82.51	27.01	1.55	5.5	1.23	2.9	0.8494	224.09	1.29	227	36	122	9	155	34.6	0.01	26.57	2.75	15.86	4.24	1.49	1.8
2	54	1	303.21	25.06	26.4	81.06	43	82.51	27.01	1.55	5.5	1.23	2.9	0.8494	224.09	1.29	253.96	43.59	119.7	17.56	178.31	1316.28	0.05	100.49	2.75	15.86	4.24	1.49	81.63
1	54	0	303.21	25.06	26.4	81.06	43	82.51	27.01	1.55	5.5	1.23	2.9	0.8494	224.09	1.29	253.96	43.59	119.7	17.56	178.31	1316.28	0.05	100.49	2.75	15.86	4.24	1.49	81.63
2	54	2	245	39	30	63	51	53	28.6	1.5	5.42	1.23	2.9	1.49	117	1.47	152	27	78	13	113	1316.28	0.05	100.49	5.56	12.3	4	1.55	81.63
2	54	0	303.21	25.06	26.4	81.06	43	82.51	27.01	1.55	5.5	1.23	2.9	0.8494	224.09	1.29	253.96	43.59	119.7	17.56	178.31	21	0	0	2.75	15.86	4.24	1.49	3.49
2	54	2	8.86	14	18	44	21	54	26	1.8	5.31	1.23	2.9	1.29	82.2	1.13	163	29	48	9	152	1316.28	0.05	100.49	2.75	15.86	4.24	1.49	81.63
1	54	2	303.21	25.06	26.4	81.06	43	82.51	27.01	1.55	5.5	1.23	2.9	0.8494	224.09	1.29	253.96	43.59	119.7	17.56	178.31	1316.28	0.05	100.49	2.75	15.86	4.24	1.49	81.63
1	54	3	303.21	13	28	68	15.8	54	24.3	1.6	4.21	1.5	2.86	0.7	54	1.64	253.96	43.59	119.7	17.56	178.31	1316.28	0.05	100.49	2.75	15.86	4.24	1.49	6.23
1	54	0	169	23	20	73	21	90	25.1	1.5	4.72	1.23	2.9	0.68	34.5	1.28	103	21	112	8	75	9.9	0.01	0	4.67	12.89	5.02	1.74	81.63
1	54	1	303.21	25.06	26.4	81.06	43	82.51	27.01	1.55	5.5	1.23	2.9	0.8494	224.09	1.29	253.96	43.59	119.7	17.56	178.31	1316.28	0.05	100.49	2.75	15.86	4.24	1.49	81.63
2	54	1	3.92	9	14	40	12	54	37.2	1.2	4.81	1.23	2.9	0.77	55.2	1.62	157	26	82	6	114	46.5	0.01	0	1.18	13.5	4.47	1.76	81.63
1	54	1	303.21	10	15	63	43	82.51	27.01	1.55	7.04	1.23	2.9	0.8494	224.09	1.29	150	32	110	7	143	1316.28	0.05	100.49	2.75	15.86	4.24	1.49	81.63
2	54	0	303.21	30	17	36	51	140	28.2	1.4	5.32	1.15	3.04	0.66	27	1.31	253.96	43.59	119.7	17.56	178.31	1316.28	0.05	100.49	2.75	15.86	4.24	1.49	81.63
1	54	1	303.21	95	29	66	49	61	25.4	1.7	6.9	0.83	2.53	0.66	72	1.14	257	34	19	9	150	76.4	0.01	31.22	2.75	15.86	4.24	1.49	5.97
2	54	1	303.21	25	27	69	98	136	34	1.2	5.07	1.23	2.9	0.94	224.09	1.29	253.96	43.59	119.7	17.56	178.31	1316.28	0.05	100.49	2.75	15.86	4.24	1.49	81.63
2	54	0	303.21	25.06	26.4	81.06	43	82.51	27.01	1.55	5.5	1.23	2.9	0.8494	224.09	1.29	253.96	43.59	119.7	17.56	178.31	1316.28	0.05	100.49	2.75	15.86	4.24	1.49	81.63
2	54	0	303.21	8	16	64	11	65	26.7	1.6	4.95	1.23	2.9	0.6	82	1.44	139	31	71	9	108	1316.28	0.05	100.49	2.75	15.86	4.24	1.49	81.63
2	54	1	201.8	28	21	56	31	52	20.5	2.1	5.47	1.23	2.9	0.8494	53.1	1	186	32	137	13	157	80.2	0.01	0	1.75	14.95	4.68	1.68	81.63
2	54	0	303.21	25.06	26.4	81.06	43	82.51	27.01	1.55	5.5	1.23	2.9	0.8494	224.09	1.29	253.96	43.59	119.7	17.56	178.31	1316.28	0.05	100.49	2.75	15.86	4.24	1.49	81.63
1	54	0	303.21	11	18	102	13	45	25.7	1.7	4.94	1.22	2.96	0.59	46	1.41	253.96	43.59	119.7	17.56	178.31	1316.28	0.05	100.49	2.75	15.86	4.24	1.49	81.63
1	54	0	303.21	15	19	79	22	60	25.9	1.8	5.5	1.46	2.25	0.45	224.09	1.29	253.96	43.59	119.7	17.56	178.31	1316.28	0.05	100.49	2.75	15.86	4.24	1.49	81.63
2	54	0	303.21	10	17	57	13	82.51	27.01	1.55	4.89	1.23	2.9	1.13	224.09	1.29	149	21	124	7	99	1316.28	0.05	100.49	2.75	15.86	4.24	1.49	81.63
2	54	2	303.21	25.06	26.4	81.06	43	82.51	27.01	1.55	5.5	1.23	2.9	0.8494	224.09	1.29	253.96	43.59	119.7	17.56	178.31	1316.28	0.05	100.49	2.75	15.86	4.24	1.49	81.63
1	54	0	181	11.6	16.9	63	20.5	63	24.8	1.7	6.15	0.95	3.33	0.93	210	1.22	132	26.8	82	8	110	16.6	0.01	27.67	1.63	15.3	5.04	1.84	9.49
1	54	1	303.21	20.6	19.7	61	30.4	82.51	27.01	1.55	5.14	0.8	3.3	0.9	224.09	1.29	253.96	43.59	119.7	17.56	178.31	1316.28	0.05	100.49	2.75	15.86	4.24	1.49	81.63
2	54	2	68.4	12	14	82	13	66	31.6	1.5	4.59	1.23	2.9	0.96	341.2	1.42	154	26	34	5	136	1316.28	0.05	100.49	3.11	14.2	4.19	1.49	81.63
2	54	3	303.21	15.4	17.3	64	7.7	57	21.5	1.8	4.46	1.45	3.09	0.85	116	1.57	253.96	43.59	119.7	17.56	178.31	1316.28	0.05	100.49	1.57	19.3	4.66	1.4	81.63
2	53	3	303.21	14.7	15.1	61	19.9	61	28	1.6	5.39	1.27	3.56	0.83	18	1.37	143	25.8	83	10	108	1316.28	0.05	100.49	2.75	15.86	4.24	1.49	81.63
2	53	3	303.21	28	24	57	20	54	33.2	1.4	5.24	1.73	3.94	0.89	143	1.83	253.96	43.59	119.7	17.56	178.31	1316.28	0.05	100.49	2.75	15.86	4.24	1.49	81.63
1	53	1	415.7	38	30	57	32	62	22.6	1.6	5.21	1.23	2.9	0.83	119.7	0.78	305	29	26	17	222	31.2	0	0	1.57	16.2	4.13	1.5	37.86
2	53	2	36.18	10	17	54	18	52	20.4	2	4.83	1.23	2.9	1.2	75.2	1.54	253.96	43.59	119.7	17.56	178.31	1316.28	0.05	100.49	2.75	15.86	4.24	1.49	81.63
2	53	2	303.21	25.06	26.4	81.06	43	82.51	27.01	1.55	5.5	1.23	2.9	0.8494	224.09	1.29	253.96	43.59	119.7	17.56	178.31	1316.28	0.05	100.49	2.75	15.86	4.24	1.49	81.63
1	53	1	303.21	30	22	74	17.4	76	25.3	1.8	4.91	1.06	1.81	0.63	197	1.36	253.96	43.59	119.7	17.56	178.31	1316.28	0.05	100.49	2.75	15.86	4.24	1.49	81.63
2	53	1	303.21	131	111	52	118.6	82.51	27.01	1.55	7.63	1.23	2.9	0.8494	224.09	1.29	253.96	43.59	119.7	17.56	178.31	1316.28	0.05	100.49	2.75	15.86	4.24	1.49	81.63
1	53	2	303.21	27	21	101	25	82.51	27.01	1.55	4.91	1.23	2.9	0.8494	224.09	1.29	253.96	43.59	119.7	17.56	178.31	1316.28	0.05	100.49	2.75	15.86	4.24	1.49	81.63
2	53	2	303.21	25.06	26.4	81.06	43	82.51	27.01	1.55	5.5	1.23	2.9	0.8494	224.09	1.29	253.96	43.59	119.7	17.56	178.31	1316.28	0.05	100.49	2.75	15.86	4.24	1.49	81.63
1	53	2	303.21	15	28	102	26	82.51	31.6	1.5	4.84	1.23	2.9	1.09	224.09	1.29	253.96	43.59	119.7	17.56	178.31	1316.28	0.05	100.49	2.75	15.86	4.24	1.49	81.63
1	53	2	303.21	25.06	26.4	81.06	43	82.51	27.01	1.55	5.5	1.23	2.9	0.8494	224.09	1.29	253.96	43.59	119.7	17.56	178.31	1316.28	0.05	100.49	2.75	15.86	4.24	1.49	81.63
2	53	2	303.21	26	21	65	35	82.51	27.01	1.55	5.57	1.4	3.72	0.41	224.09	1.29	177	32	61	9	143	1316.28	0	100.49	2.67	18.1	4.59	1.46	81.63
2	53	1	303.21	17	20	51	14	82.51	27.01	1.55	4.75	1.23	2.9	0.46	224.09	1.29	177	37	75	12	133	1316.28	0.05	100.49	2.28	13.3	4.99	1.66	81.63
1	53	0	303.21	29	20	71	20	73	26	1.7	4.46	0.76	3.7	1.43	40	1.06	253.96	43.59	119.7	17.56	178.31	1316.28	0.05	100.49	2.75	15.86	4.24	1.49	81.63
2	53	0	303.21	25.06	26.4	81.06	43	82.51	27.01	1.55	5.5	1.23	2.9	0.8494	224.09	1.29	253.96	43.59	119.7	17.56	178.31	1316.28	0.05	100.49	2.75	15.86	4.24	1.49	81.63
2	53	2	303.21	15	14	64	16	30	23.6	1.8	5.39	1.23	2.9	1.75	137.7	1.51	253.96	43.59	119.7	17.56	178.31	1316.28	0.05	100.49	2.75	15.86	4.24	1.49	81.63
2	53	2	303.21	6	16	75	21	52	25.8	1.6	5.6	1.23	2.9	1.31	41.8	1.02	180	28	55	7	121	18.6	0	0	4.14	16.12	4.13	1.75	81.63
2	53	0	0	10	17	63	11	54	31.8	1.4	5.11	1.23	2.9	0.82	386	1.62	253.96	43.59	119.7	17.56	178.31	1316.28	0.05	100.49	2.29	13.37	4.34	1.53	81.63
2	53	0	303.21	15	15	50	17	56	19.6	2.1	8.83	1.23	2.9	0.8494	224.09	1.29	253.96	43.59	119.7	17.56	178.31	1316.28	0.05	100.49	2.75	15.86	4.24	1.49	81.63
2	53	0	303.21	14	16	89	13	82.51	27.01	1.55	5.01	1.23	2.9	0.8494	224.09	1.29	253.96	43.59	119.7	17.56	178.31	1316.28	0.05	100.49	2.75	15.86	4.24	1.49	81.63
2	53	3	303.21	23	25	57	19.4	82.51	27.01	1.55	5.57	1.23	2.9	0.8494	224.09	1.29	253.96	43.59	119.7	17.56	178.31	1316.28	0.05	100.49	2.75	15.86	4.24	1.49	81.63
2	53	1	303.21	37	26	64	21	82.51	27.01	1.55	6.42	1.69	3.38	0.75	224.09	1.29	201	31	65	7	146	1316.28	0.05	100.49	2.75	15.86	4.24	1.49	81.63
1	53	1	303.21	9.1	12.6	91	21.5	51	23.2	1.8	4.85	0.93	2.89	1.1	43	1.22	253.96	43.59	119.7	17.56	178.31	1316.28	0.05	100.49	2.75	15.86	4.24	1.49	81.63
2	53	2	19	24	29	65	17.2	82.51	27.01	1.55	5.76	1.34	2.77	1.29	224.09	1.29	149	31.9	89	8	111	1316.28	0.05	100.49	2.43	13.8	3.74	1.25	81.63
2	53	1	303.21	18	19	52	52	30	30.4	1.2	5.09	1.23	2.9	0.4	115	1.48	253.96	43.59	119.7	17.56	178.31	1316.28	0.05	100.49	2.75	15.86	4.24	1.49	81.63
2	53	2	303.21	18	17	53	38	82.51	27.01	1.55	4.79	1.23	2.9	1.61	224.09	1.29	253.96	43.59	119.7	17.56	178.31	1316.28	0.05	100.49	2.75	15.86	4.24	1.49	81.63
2	53	0	303.21	15	20	62	14	82.51	27.01	1.55	5.19	1.23	2.9	0.77	224.09	1.29	253.96	43.59	119.7	17.56	178.31	1316.28	0.05	100.49	2.75	15.86	4.24	1.49	81.63
2	53	2	303.21	25.06	26.4	81.06	43	82.51	27.01	1.55	5.5	1.23	2.9	0.8494	224.09	1.29	253.96	43.59	119.7	17.56	178.31	1316.28	0.05	100.49	2.75	15.86	4.24	1.49	81.63
2	53	2	303.21	25	17	50	14	82.51	27.01	1.55	6.07	1.23	2.9	0.8494	224.09	1.29	176	33	75	20	142	1316.28	0.05	100.49	2.75	15.86	4.24	1.49	81.63
2	53	0	303.21	4	14	58	12	82.51	27.01	1.55	5.3	1.23	2.9	0.53	224.09	1.29	253.96	43.59	119.7	17.56	178.31	1316.28	0.05	100.49	2.75	15.86	4.24	1.49	81.63
2	53	1	303.21	8	14	39	17	82.51	27.01	1.55	5.39	1.23	2.9	1.41	224.09	1.29	136	27	101	7	102	1316.28	0.05	100.49	2.75	15.86	4.24	1.49	81.63
2	53	2	303.21	13	14	55	12	61	21.4	2	4.89	1.23	2.9	0.8494	60.5	1.4	253.96	43.59	119.7	17.56	178.31	1316.28	0.05	100.49	2.75	15.86	4.24	1.49	81.63
1	53	3	303.21	20	17	76	19	77	31.5	1.4	5.24	0.98	3.57	1.3	192	1.22	253.96	43.59	119.7	17.56	178.31	1316.28	0.05	100.49	2.75	15.86	4.24	1.49	81.63
1	53	0	307	9	17	65	33.3	77	23.4	1.7	8.48	1.26	3.96	0.74	94	1.21	253.96	43.59	119.7	17.56	178.31	1316.28	0.05	100.49	2.62	16.1	4.18	1.48	6.12
2	53	0	303.21	25.06	26.4	81.06	43	82.51	27.01	1.55	5.5	1.23	2.9	0.8494	224.09	1.29	253.96	43.59	119.7	17.56	178.31	1316.28	0.05	100.49	2.75	15.86	4.24	1.49	81.63
2	53	2	303.21	25.06	26.4	81.06	43	82.51	27.01	1.55	5.5	1.23	2.9	0.8494	224.09	1.29	253.96	43.59	119.7	17.56	178.31	1316.28	0.05	100.49	2.75	15.86	4.24	1.49	81.63
2	53	2	303.21	11	15	74	11	56	20.6	2	4.62	1.23	2.9	1.02	46.2	1.13	253.96	43.59	119.7	17.56	178.31	1316.28	0.05	100.49	2.75	15.86	4.24	1.49	81.63
1	53	0	303.21	12	14	75	20	58	25	1.6	4.26	1.41	2.84	0.47	44	1.49	253.96	43.59	119.7	17.56	178.31	1316.28	0.05	100.49	2.75	15.86	4.24	1.49	81.63
2	53	1	303.21	17	15	52	16	47	23.2	1.8	4.85	1.23	2.9	0.8494	551.2	0.9	253.96	43.59	119.7	17.56	178.31	1316.28	0.05	100.49	2.75	15.86	4.24	1.49	81.63
1	53	1	303.21	21	29	84	18	53	29.2	1.6	5.63	1	3.15	1.03	231	1.38	253.96	43.59	119.7	17.56	178.31	1316.28	0.05	100.49	2.75	15.86	4.24	1.49	81.63
1	53	2	303.21	23	22	86	57	70	26	1.8	6.16	0.93	2.88	1.02	83	1.19	253.96	43.59	119.7	17.56	178.31	1316.28	0.05	100.49	2.75	15.86	4.24	1.49	81.63
2	53	2	303.21	30	22	60	24	82.51	27.01	1.55	5.67	1.23	2.9	0.8494	224.09	1.29	253.96	43.59	119.7	17.56	178.31	1316.28	0.05	100.49	2.75	15.86	4.24	1.49	81.63
2	53	0	303.21	22	23	50	15	47	24.6	1.5	5.25	1.23	2.9	0.8494	31.2	1.7	253.96	43.59	119.7	17.56	178.31	1316.28	0.05	100.49	2.75	15.86	4.24	1.49	81.63
2	53	2	303.21	58	30	68	16	56	27.3	1.5	5.1	1.09	3.33	1.38	30	1.38	253.96	43.59	119.7	17.56	178.31	1316.28	0.05	100.49	2.75	15.86	4.24	1.49	81.63
2	53	0	303.21	19	16	42	29	82.51	27.01	1.55	7.52	1.23	2.9	0.76	224.09	1.29	253.96	43.59	119.7	17.56	178.31	1316.28	0.05	100.49	2.75	15.86	4.24	1.49	81.63
2	53	1	303.21	14	18	55	10	82.51	27.01	1.55	5.22	1.23	2.9	0.48	224.09	1.29	253.96	43.59	119.7	17.56	178.31	1316.28	0.05	100.49	0.72	14.5	4.27	1.22	81.63
2	53	2	303.21	24	32	54	13	71	28.6	1.6	5.65	1.21	3.03	0.97	695	1.49	253.96	43.59	119.7	17.56	178.31	1316.28	0.05	100.49	2.75	15.86	4.24	1.49	81.63
1	53	1	303.21	100	37	75	71	66	24.4	1.7	5.23	1.35	2.93	0.41	115	1.27	253.96	43.59	119.7	17.56	178.31	43.6	0.01	31.35	2.75	15.86	4.24	1.49	16.11
1	53	2	303.21	52	29	80	73.8	82.51	25.6	1.7	6.15	1.4	4.04	1.37	224.09	1.29	253.96	43.59	119.7	17.56	178.31	1316.28	0.05	100.49	2.75	15.86	4.24	1.49	81.63
2	53	0	303.21	12	16	51	17	82.51	32.1	1.4	6.24	1.76	4.05	0.7	224.09	1.29	253.96	43.59	119.7	17.56	178.31	1316.28	0.05	100.49	1.13	13.75	4.46	1.47	81.63
1	53	0	303.21	16.9	20.3	91	16.7	98	28	1.6	4.87	1.09	3.08	1.15	157	1.23	253.96	43.59	119.7	17.56	178.31	1316.28	0.05	100.49	2.75	15.86	4.24	1.49	81.63
2	53	2	303.21	9.6	13.3	55	9.2	51	28.6	1.4	5.37	1.07	3.15	1.45	6	1.31	253.96	43.59	119.7	17.56	178.31	1316.28	0.05	100.49	2.75	15.86	4.24	1.49	81.63
1	53	3	149.6	40	35	95	28	58	36.2	1.3	5.66	1.28	3.15	1.11	77.6	1.3	253.96	43.59	119.7	17.56	178.31	1316.28	0.05	100.49	2.75	15.86	4.24	1.49	81.63
1	53	0	448.7	92	45	66	100	117	21.8	1.8	5.6	1.23	2.9	0.8494	283.8	0.8	165	28	34	8	118	47.4	0.01	25.83	2.75	15.86	4.24	1.49	81.63
2	53	0	303.21	9	14	64	15	52	22.7	1.7	4.75	1.12	3.15	0.62	309	1.22	253.96	43.59	119.7	17.56	178.31	1316.28	0.05	100.49	2.75	15.86	4.24	1.49	81.63
2	53	2	303.21	8	15	44	8	48	22	1.9	4.76	1.23	2.9	0.85	103.9	1.17	253.96	43.59	119.7	17.56	178.31	1316.28	0.05	100.49	2.75	15.86	4.24	1.49	81.63
2	53	0	303.21	12	14	63	38	82.51	27.01	1.55	5.04	1.23	2.9	0.8494	224.09	1.29	253.96	43.59	119.7	17.56	178.31	1316.28	0.05	100.49	1.66	15.96	4.66	1.67	81.63
2	53	1	303.21	25.06	26.4	81.06	43	82.51	27.01	1.55	5.5	1.23	2.9	0.8494	224.09	1.29	253.96	43.59	119.7	17.56	178.31	1316.28	0.05	100.49	2.75	15.86	4.24	1.49	81.63
2	53	2	303.21	8	15	66	21	44	23.2	1.7	4.94	1.23	2.9	0.77	67.1	0.96	164	27	50	9	126	1316.28	0.05	100.49	2.75	15.86	4.24	1.49	81.63
1	53	1	303.21	26	26	68	35.5	63	24	1.6	6.24	0.71	2.45	0.89	31	0.94	253.96	43.59	119.7	17.56	178.31	1316.28	0.05	100.49	2.75	15.86	4.24	1.49	24.9
2	53	0	303.21	20	17	52	14	82.51	27.01	1.55	5.39	1.23	2.9	1.01	224.09	1.29	253.96	43.59	119.7	17.56	178.31	1316.28	0.05	100.49	2.75	15.86	4.24	1.49	81.63
2	53	2	303.21	14	21	63	17	55	29.7	1.6	5.95	1.23	2.9	0.67	272.9	1.7	253.96	43.59	119.7	17.56	178.31	1316.28	0.05	100.49	2.06	13.03	4.26	1.52	81.63
2	53	0	303.21	25.06	26.4	81.06	43	82.51	27.01	1.55	5.5	1.23	2.9	0.8494	224.09	1.29	253.96	43.59	119.7	17.56	178.31	1316.28	0.05	100.49	2.75	15.86	4.24	1.49	81.63
1	53	2	303.21	14	22	61	12	65	23.6	1.8	4.19	1.23	2.9	0.78	50.4	1.3	253.96	43.59	119.7	17.56	178.31	1316.28	0.05	100.49	2.75	15.86	4.24	1.49	81.63
1	53	0	303.21	38.2	23.3	54	34.8	63	24.3	1.5	4.78	1.04	2.97	0.98	317	1.15	253.96	43.59	119.7	17.56	178.31	1316.28	0.05	100.49	2.75	15.86	4.24	1.49	81.63
2	53	0	303.21	16	18	39	18	61	28.7	1.7	5.74	1.74	2.32	0.31	37	1.92	253.96	43.59	119.7	17.56	178.31	1316.28	0.05	100.49	2.75	15.86	4.24	1.49	81.63
2	53	2	303.21	13	21	59	17	82.51	27.01	1.55	5.44	1.23	2.9	0.57	224.09	1.29	253.96	43.59	119.7	17.56	178.31	1316.28	0.05	100.49	2.75	15.86	4.24	1.49	81.63
2	53	1	303.21	6	14	81.06	10	82.51	27.01	1.55	5.5	1.23	2.9	0.8494	224.09	1.29	253.96	43.59	119.7	17.56	178.31	1316.28	0.05	100.49	2.75	15.86	4.24	1.49	81.63
2	53	2	303.21	26.3	22.9	57	18.9	70	31.7	1.4	5.12	1.56	3.99	1.33	187	1.65	253.96	43.59	119.7	17.56	178.31	1316.28	0.05	100.49	2.75	15.86	4.24	1.49	81.63
2	53	2	303.21	25.06	26.4	81.06	43	82.51	27.01	1.55	5.5	1.23	2.9	0.8494	224.09	1.29	253.96	43.59	119.7	17.56	178.31	1316.28	0.05	100.49	2.75	15.86	4.24	1.49	81.63
1	53	2	453	28.4	21.2	60	30.3	69	22.5	1.8	6.47	1.15	2.92	1.13	78	1.46	156	32.2	78	13	130	0	0	0	2.82	16.9	4.85	1.8	1.74
2	53	3	303.21	28	30	45	30	82.51	27.01	1.55	5.25	1.23	2.9	1.36	224.09	1.29	253.96	43.59	119.7	17.56	178.31	1316.28	0.05	100.49	3.33	16	5.18	2.07	81.63
2	53	1	303.21	13	19	56	11.6	82.51	27.01	1.55	5.93	1.86	2.68	0.55	224.09	1.29	253.96	43.59	119.7	17.56	178.31	1316.28	0.05	100.49	2.75	15.86	4.24	1.49	81.63
2	53	1	303.21	20	22	52	16	68	28.5	1.6	4.61	1.23	2.9	0.84	91	1.56	253.96	43.59	119.7	17.56	178.31	1316.28	0.05	100.49	2.75	15.86	4.24	1.49	81.63
2	53	3	303.21	25.06	26.4	81.06	43	82.51	27.01	1.55	5.5	1.23	2.9	0.8494	224.09	1.29	253.96	43.59	119.7	17.56	178.31	1316.28	0.05	100.49	2.75	15.86	4.24	1.49	81.63
1	53	1	303.21	25.06	26.4	81.06	43	82.51	27.01	1.55	5.5	1.23	2.9	0.8494	224.09	1.29	253.96	43.59	119.7	17.56	178.31	1316.28	0.05	100.49	2.75	15.86	4.24	1.49	81.63
1	53	1	303.21	25.06	26.4	81.06	43	82.51	27.01	1.55	5.5	1.23	2.9	0.8494	224.09	1.29	253.96	43.59	119.7	17.56	178.31	1316.28	0.05	100.49	2.75	15.86	4.24	1.49	81.63
2	53	1	303.21	12	23	63	18	43	37.8	1.1	4.68	1.23	2.9	1.21	114.1	1.52	253.96	43.59	119.7	17.56	178.31	1316.28	0.05	100.49	2.75	15.86	4.24	1.49	81.63
2	53	1	1049	60	58	48	120	190	25.6	1.4	7.41	0.75	1.54	0.45	107.9	0.91	221	34	358	13	171	1255	0.02	0	2.43	10.3	1.84	0.85	3.17
2	53	1	303.21	25.06	26.4	81.06	43	82.51	27.01	1.55	5.5	1.23	2.9	0.8494	224.09	1.29	253.96	43.59	119.7	17.56	178.31	1316.28	0.05	100.49	2.75	15.86	4.24	1.49	81.63
1	53	1	303.21	25.06	26.4	81.06	43	82.51	27.01	1.55	5.5	1.23	2.9	0.8494	224.09	1.29	253.96	43.59	119.7	17.56	178.31	1316.28	0.05	100.49	2.75	15.86	4.24	1.49	81.63
1	53	1	303.21	44	28	87	41	39	20.5	2	5.72	1.23	2.9	0.88	410.2	1.05	253.96	43.59	119.7	17.56	178.31	1316.28	0.05	100.49	2.75	15.86	4.24	1.49	81.63
2	53	2	51.55	13	14	58	20	50	31.3	1.3	5.52	1.23	2.9	1.24	45.1	1.23	253.96	43.59	119.7	17.56	178.31	1316.28	0.05	100.49	2.75	15.86	4.24	1.49	81.63
2	53	1	303.21	51	44	57	18	82.51	29.4	1.5	4.51	1.34	3.86	0.8494	224.09	1.29	253.96	43.59	119.7	17.56	178.31	1316.28	0.05	100.49	4.68	15.6	5.45	1.49	81.63
1	53	1	303.21	22	19	61	14	82.51	27.01	1.55	5.33	1.23	2.9	0.8494	224.09	1.29	253.96	43.59	119.7	17.56	178.31	1316.28	0.05	100.49	2.75	15.86	4.24	1.49	81.63
1	53	0	303.21	33	22	109	43	82.51	27.01	1.55	5.5	1.23	2.9	0.8494	224.09	1.29	179	34	195	5	126	1316.28	0.05	100.49	2.75	15.86	4.24	1.49	81.63
2	53	0	303.21	15	21	64	10	82.51	27.01	1.55	4.64	1.23	2.9	0.56	224.09	1.29	253.96	43.59	119.7	17.56	178.31	1316.28	0.05	100.49	2.75	15.86	4.24	1.49	81.63
2	52	2	303.21	28	18	62	60	82.51	27.01	1.55	5.93	1.23	2.9	1.43	224.09	1.29	253.96	43.59	119.7	17.56	178.31	1316.28	0.05	100.49	2.75	15.86	4.24	1.49	81.63
1	52	2	303.21	42	28	77	38	64	33.5	1.4	5.05	1.08	2.03	0.75	19.3	1.1	149	25	55	10	109	1316.28	0.05	100.49	3.66	13.44	4.11	1.23	81.63
2	52	2	303.21	9	28	54	10	82.51	27.01	1.55	5.21	1.23	2.9	1.13	224.09	1.29	253.96	43.59	119.7	17.56	178.31	1316.28	0.05	100.49	2.75	15.86	4.24	1.49	81.63
1	52	0	303.21	48	26	74	49	85	28.7	1.7	4.72	0.82	3.82	1.35	104	1.11	253.96	43.59	119.7	17.56	178.31	1316.28	0.05	100.49	2.75	15.86	4.24	1.49	81.63
1	52	2	303.21	62	30	77	48	82.51	27.01	1.55	5.97	1.23	2.9	0.8494	224.09	1.29	253.96	43.59	119.7	17.56	178.31	1316.28	0.05	100.49	2.75	15.86	4.24	1.49	81.63
1	52	1	303.21	19	28	75	12.1	82.51	28.7	1.7	5.36	1.25	2.14	0.53	224.09	1.29	253.96	43.59	119.7	17.56	178.31	1316.28	0.05	100.49	2.75	15.86	4.24	1.49	81.63
2	52	1	303.21	13	17	68	14	82.51	27.01	1.55	5.81	1.23	2.9	0.8494	224.09	1.29	253.96	43.59	119.7	17.56	178.31	1316.28	0.05	100.49	2.75	15.86	4.24	1.49	81.63
1	52	1	303.21	48	32	83	37	71	26.6	1.8	5.55	1.23	2.9	1.05	483	1.42	253.96	43.59	119.7	17.56	178.31	1316.28	0.05	100.49	2.75	15.86	4.24	1.49	81.63
2	52	2	303.21	24.2	23.5	74	11.9	82.51	27.01	1.55	5.48	1.23	2.9	0.8494	224.09	1.29	253.96	43.59	119.7	17.56	178.31	1316.28	0.05	100.49	2.75	15.86	4.24	1.49	81.63
2	52	1	7.16	31.7	25.5	62	29.8	57	28.2	1.6	4.86	1.71	3.49	0.83	324.7	1.36	253.96	43.59	119.7	17.56	178.31	1316.28	0.05	100.49	2.75	15.86	4.24	1.49	81.63
2	52	3	303.21	15	19	54	17	82.51	27.01	1.55	5.26	1.23	2.9	1.18	224.09	1.29	253.96	43.59	119.7	17.56	178.31	1316.28	0.05	100.49	2.75	15.86	4.24	1.49	81.63
2	52	2	303.21	12	19	66	15	82.51	27.01	1.55	5.42	1.23	2.9	0.41	224.09	1.29	253.96	43.59	119.7	17.56	178.31	1316.28	0.05	100.49	5.16	14.99	4.27	1.42	81.63
2	52	0	303.21	11.4	19	61	12.7	82.51	30.3	1.5	4.9	1.23	2.9	0.8494	224.09	1.29	253.96	43.59	119.7	17.56	178.31	1316.28	0.05	100.49	2.75	15.86	4.24	1.49	81.63
1	52	0	118	37	21	71	48	55	23.4	1.7	5.35	0.76	1.99	0.7	3	1.18	151	22	83	11	106	0	0.01	25.09	7.16	14	5	2.15	20.98
2	52	2	303.21	14.1	20.5	58	28.7	82.51	27.01	1.55	5.09	1.23	2.9	0.8494	224.09	1.29	253.96	43.59	119.7	17.56	178.31	1316.28	0.05	100.49	2.4	17.4	5.24	2.33	81.63
1	52	0	303.21	25	15	81.06	28	82.51	27.01	1.55	5.02	1.23	2.9	0.66	224.09	1.29	253.96	43.59	119.7	17.56	178.31	1316.28	0.05	100.49	2.75	15.86	4.24	1.49	81.63
2	52	0	303.21	25.06	26.4	81.06	43	82.51	27.01	1.55	5.5	1.23	2.9	0.8494	224.09	1.29	253.96	43.59	119.7	17.56	178.31	1316.28	0.05	100.49	2.75	15.86	4.24	1.49	81.63
2	52	0	303.21	12	17	50	16	82.51	27.01	1.55	5.29	1.23	2.9	0.8494	224.09	1.29	115	25	60	7	108	1316.28	0.05	100.49	2.75	15.86	4.24	1.49	81.63
1	52	3	303.21	46	30	74	31	76	27.2	1.7	5.33	1.23	2.9	1.17	77.6	1.16	253.96	43.59	119.7	17.56	178.31	1316.28	0.05	100.49	2.75	15.86	4.24	1.49	81.63
1	52	1	303.21	21	25	100	39	82.51	27.01	1.55	5.22	1.23	2.9	0.8494	224.09	1.29	253.96	43.59	119.7	17.56	178.31	1316.28	0.05	100.49	2.75	15.86	4.24	1.49	81.63
2	52	0	303.21	31	26	68	35	82.51	27.01	1.55	5.91	1.23	2.9	1.66	224.09	1.29	253.96	43.59	119.7	17.56	178.31	1316.28	0.05	100.49	2.75	15.86	4.24	1.49	81.63
2	52	2	303.21	15	11	64	17	82.51	27.01	1.55	5.5	1.23	2.9	0.8494	224.09	1.29	253.96	43.59	119.7	17.56	178.31	1316.28	0.05	100.49	2.75	15.86	4.24	1.49	81.63
2	52	2	220	29	27	58	16	82.51	31.3	1.4	5.48	1.54	2.54	0.45	224.09	1.29	189	31	62	9	137	1316.28	0.05	100.49	1.52	15.9	5.12	1.72	81.63
1	52	1	303.21	11	17	80	22	43	20.8	2	4.08	1.23	2.9	1.02	143	1.12	139	19	55	5	83	1316.28	0.05	100.49	2.75	15.86	4.24	1.49	81.63
1	52	3	139	51.1	35.7	97	45.8	47	29.8	1.5	6.42	0.93	3.42	1.52	23	1.12	186	31	174	9	131	1316.28	0.05	100.49	1.75	14.8	5.57	2.25	81.63
2	52	0	49.4	11	17	64	29	82.51	27.01	1.55	4.78	1.23	2.9	0.54	224.09	1.29	253.96	43.59	119.7	17.56	178.31	1316.28	0.05	100.49	2.75	15.86	4.24	1.49	81.63
2	52	1	303.21	25.06	26.4	53	43	82.51	27.01	1.55	5.5	1.23	2.9	0.8494	224.09	1.29	253.96	43.59	119.7	17.56	178.31	1316.28	0.05	100.49	2.75	15.86	4.24	1.49	81.63
2	52	2	303.21	27	33	67	16	82.51	27.01	1.55	5.36	1.23	2.9	0.92	224.09	1.29	253.96	43.59	119.7	17.56	178.31	1316.28	0.05	100.49	2.75	15.86	4.24	1.49	81.63
2	52	1	84.02	32	29	54	34	82.51	27.01	1.55	4.72	1.23	2.9	1.02	224.09	1.29	253.96	43.59	119.7	17.56	178.31	1316.28	0.05	100.49	0.73	18.2	4.88	1.49	81.63
2	52	2	303.21	25.06	26.4	81.06	43	82.51	27.01	1.55	5.5	1.23	2.9	0.8494	224.09	1.29	253.96	43.59	119.7	17.56	178.31	1316.28	0.05	100.49	2.75	15.86	4.24	1.49	81.63
1	52	1	303.21	20	31	84	24	66	29.3	1.5	4.92	1.23	1.56	0.21	79	1.3	253.96	43.59	119.7	17.56	178.31	1316.28	0.05	100.49	2.75	15.86	4.24	1.49	81.63
2	52	2	303.21	16.7	20.2	48	11.8	61	27.2	1.4	4.35	1.5	2.53	0.67	550	1.54	253.96	43.59	119.7	17.56	178.31	1316.28	0.05	100.49	2.75	15.86	4.24	1.49	81.63
1	52	1	303.21	35	28	61	24	94	33.3	1.4	5.37	1.41	2.84	0.59	105	1.61	253.96	43.59	119.7	17.56	178.31	1316.28	0.05	100.49	2.75	15.86	4.24	1.49	81.63
2	52	2	303.21	57.3	50.8	57	33	87	25.9	1.6	4.6	1.3	3.06	1.39	125	1.66	253.96	43.59	119.7	17.56	178.31	1316.28	0.05	100.49	2.75	15.86	4.24	1.49	81.63
1	52	2	303.21	25.06	26.4	81.06	43	82.51	27.01	1.55	5.64	1.23	2.9	0.8494	224.09	1.29	253.96	43.59	119.7	17.56	178.31	1316.28	0.05	100.49	2.75	15.86	4.24	1.49	81.63
2	52	2	303.21	7	14	48	16	88	27.1	1.5	5.16	1.23	2.9	0.7	63	1.28	253.96	43.59	119.7	17.56	178.31	1316.28	0.05	100.49	2.75	15.86	4.24	1.49	81.63
2	52	0	303.21	17	21	62	34	83	29.9	1.6	5.5	1.08	3.9	1.17	294	1.32	253.96	43.59	119.7	17.56	178.31	1316.28	0.05	100.49	2.75	15.86	4.24	1.49	81.63
1	52	1	303.21	15	15	77	20	55	21.6	1.9	4.5	1.23	2.9	0.73	196	1.33	253.96	43.59	119.7	17.56	178.31	1316.28	0.05	100.49	2.75	15.86	4.24	1.49	81.63
2	52	2	303.21	11	18	62	10	32	28.5	1.6	4.64	1.23	2.9	0.44	132	1.46	253.96	43.59	119.7	17.56	178.31	1316.28	0.05	100.49	1.96	13.9	4.36	1.45	81.63
2	52	2	84.66	14	19	80	26	58	31	1.5	4.94	1.23	2.9	1.01	110.3	1.71	146	35	47	11	130	33.3	0.01	0	2.3	16.21	4.68	1.58	81.63
2	52	0	303.21	25.06	26.4	81.06	43	82.51	27.01	1.55	5.5	1.23	2.9	0.8494	224.09	1.29	253.96	43.59	119.7	17.56	178.31	1316.28	0.05	100.49	2.75	15.86	4.24	1.49	81.63
2	52	1	44.1	18	18	51	13	65	19.4	2.2	4.95	1.23	2.9	0.8494	540	1.6	177	31	58	8	133	1316.28	0.05	100.49	2.75	15.86	4.24	1.49	81.63
1	52	0	303.21	23	16	73	18	66	27.2	1.4	4.25	1.23	2.9	0.6	11.2	1.15	253.96	43.59	119.7	17.56	178.31	1316.28	0.05	100.49	2.75	15.86	4.24	1.49	81.63
2	52	1	303.21	17	19	60	14	53	20.4	1.7	5	1.23	2.9	1.07	347.8	1.6	176	32	102	8	149	41.9	0	0	2.75	15.86	4.24	1.49	81.63
1	52	0	303.21	31.5	19.6	76	34	73	21.1	1.8	4.39	0.93	3.46	1.43	662	1.23	253.96	43.59	119.7	17.56	178.31	1316.28	0.05	100.49	2.75	15.86	4.24	1.49	81.63
2	52	2	303.21	25.06	26.4	81.06	43	82.51	27.01	1.55	5.5	1.23	2.9	0.8494	224.09	1.29	253.96	43.59	119.7	17.56	178.31	1316.28	0.05	100.49	2.75	15.86	4.24	1.49	81.63
2	52	2	303.21	5	12	65	11	82.51	27.01	1.55	5.23	1.23	2.9	0.74	224.09	1.29	253.96	43.59	119.7	17.56	178.31	1316.28	0.05	100.49	1.24	15.05	4.47	1.61	81.63
2	52	0	303.21	18	18	68	54	82.51	27.01	1.55	7.47	1.23	2.9	0.97	224.09	1.29	253.96	43.59	119.7	17.56	178.31	1316.28	0.05	100.49	2.75	15.86	4.24	1.49	81.63
1	52	0	486.2	20	27	89	68.5	65	32	1.3	5.87	1.77	2.36	0.42	69.4	1.54	253.96	43.59	119.7	17.56	178.31	1316.28	0.05	100.49	2.59	17.3	5.55	1.75	81.63
2	52	2	303.21	16	18	56	21	41	28.7	1.5	5.11	1.23	2.9	1.79	52	1.25	253.96	43.59	119.7	17.56	178.31	1316.28	0.05	100.49	2.75	15.86	4.24	1.49	81.63
2	52	2	303.21	16.9	19.4	44	17.2	82.51	27.01	1.55	3.68	1.21	2.09	0.84	224.09	1.29	253.96	43.59	119.7	17.56	178.31	1316.28	0.05	100.49	2.75	15.86	4.24	1.49	81.63
2	52	2	303.21	26	17	63	21	82.51	27.01	1.55	7.99	1.23	2.9	1.53	224.09	1.29	253.96	43.59	119.7	17.56	178.31	1316.28	0.05	100.49	2.75	15.86	4.24	1.49	81.63
2	52	1	75	13	19	58	12	67	24.4	1.7	4.5	1.27	3.08	0.43	441	1.3	155	38	66	8	127	35.5	0	0	1.93	15.2	4.22	1.36	1.65
2	52	1	303.21	13	15	49	11	54	33.8	1.3	5.48	1.23	2.9	0.94	137	1.27	253.96	43.59	119.7	17.56	178.31	1316.28	0.05	100.49	1.26	15.5	4.72	1.72	81.63
2	52	0	303.21	12	14	58	13	82.51	27.01	1.55	4.57	1.23	2.9	0.63	224.09	1.29	253.96	43.59	119.7	17.56	178.31	1316.28	0.05	100.49	2.75	15.86	4.24	1.49	81.63
2	52	1	303.21	25	22	71	17	74	35.1	1.4	5.52	1.44	3.82	0.72	84	1.58	253.96	43.59	119.7	17.56	178.31	1316.28	0.05	100.49	2.75	15.86	4.24	1.49	81.63
2	52	2	303.21	10	12	55	21.3	82.51	27.01	1.55	5.72	0.99	2.94	1.11	224.09	1.29	253.96	43.59	119.7	17.56	178.31	1316.28	0.05	100.49	2.75	15.86	4.24	1.49	81.63
1	52	3	303.21	22	18	105	12	64	24.8	1.7	6.49	1.23	2.9	0.8494	224.09	1.29	253.96	43.59	119.7	17.56	178.31	1316.28	0.05	100.49	2.75	15.86	4.24	1.49	81.63
2	52	1	303.21	20	19	56	30	82.51	32.6	1.4	5.65	1.23	2.9	0.8494	224.09	1.29	253.96	43.59	119.7	17.56	178.31	1316.28	0.05	100.49	2.75	15.86	4.24	1.49	81.63
1	52	2	303.21	47	38	80	46	71	27.2	1.7	5.29	1.8	2.78	0.47	34	1.8	253.96	43.59	119.7	17.56	178.31	1316.28	0.05	100.49	2.75	15.86	4.24	1.49	81.63
2	52	2	303.21	5	15	59	14	47	24.9	1.8	4.51	1.23	2.9	1.15	158.6	1.5	253.96	43.59	119.7	17.56	178.31	1316.28	0.05	100.49	2.75	15.86	4.24	1.49	81.63
2	52	2	303.21	17.9	13.3	68	35	58	23.5	1.5	6.67	1.19	4.16	1.32	291	1.35	253.96	43.59	119.7	17.56	178.31	1316.28	0.05	100.49	0.68	17.4	4.24	1.62	11.1
2	52	2	303.21	14	20	61	15	82.51	27.01	1.55	4.51	1.23	2.9	0.94	224.09	1.29	253.96	43.59	119.7	17.56	178.31	1316.28	0.05	100.49	2.75	15.86	4.24	1.49	81.63
2	52	2	303.21	13	37	63	17	82.51	27.01	1.55	6.24	1.23	2.9	0.61	224.09	1.29	253.96	43.59	119.7	17.56	178.31	1316.28	0.05	100.49	2.75	15.86	4.24	1.49	81.63
2	52	2	303.21	11	16	61	22	49	26.5	1.8	5.01	1.23	2.9	1.13	105	1.76	253.96	43.59	119.7	17.56	178.31	1316.28	0.05	100.49	2.75	15.86	4.24	1.49	81.63
2	52	1	303.21	10	17	68	43	82.51	27.01	1.55	5.77	1.23	2.9	0.8494	224.09	1.29	233	43	84	24	148	1316.28	0.05	100.49	2.75	15.86	4.24	1.49	81.63
1	52	1	303.21	36	20	62	16	44	24.6	1.7	4.99	1.23	2.9	1.55	556.9	1.14	165	29	112	10	129	1316.28	0.05	100.49	2.42	16.57	4.47	1.81	81.63
2	52	0	303.21	25.06	26.4	81.06	43	82.51	27.01	1.55	5.5	1.23	2.9	0.8494	224.09	1.29	253.96	43.59	119.7	17.56	178.31	1316.28	0.05	100.49	2.75	15.86	4.24	1.49	81.63
1	52	0	303.21	41	24	77	149	82.51	34.7	1.2	5.81	1.23	2.9	0.8494	224.09	1.29	253.96	43.59	119.7	17.56	178.31	1316.28	0.05	100.49	2.75	15.86	4.24	1.49	81.63
2	52	2	126	19	20	60	16	82.51	27.01	1.55	5.06	1.66	3.59	1.01	224.09	1.29	210	35	64	10	156	1316.28	0.05	100.49	2.41	15	4.45	1.25	81.63
2	52	2	303.21	25.06	26.4	81.06	43	82.51	27.01	1.55	5.5	1.23	2.9	0.8494	224.09	1.29	253.96	43.59	119.7	17.56	178.31	1316.28	0.05	100.49	2.75	15.86	4.24	1.49	81.63
1	52	0	303.21	25.06	26.4	81.06	43	82.51	27.01	1.55	5.5	1.23	2.9	0.8494	224.09	1.29	253.96	43.59	119.7	17.56	178.31	1316.28	0.05	100.49	2.75	15.86	4.24	1.49	81.63
2	52	1	303.21	18.9	24.4	58	14.7	88	27.1	1.6	4.95	1.1	3.54	1.02	293	1.19	253.96	43.59	119.7	17.56	178.31	1316.28	0.05	100.49	2.75	15.86	4.24	1.49	81.63
1	52	3	80.7	28.3	25.8	79	23.8	91	21.2	2.2	5.39	1.69	3.15	0.67	350	1.92	180	34.2	166	15	147	1316.28	0.05	100.49	1.8	14.9	5.49	1.81	81.63
2	52	1	164	24	36	57	55	80	27.4	1.4	4.92	1.23	2.9	0.95	341.7	0.94	187	31	43	14	155	24.5	0.02	0	3.72	16.9	5.37	2.16	101.1
2	52	0	303.21	11	13	50	16	82.51	27.01	1.55	5.18	1.23	2.9	1.09	224.09	1.29	253.96	43.59	119.7	17.56	178.31	1316.28	0.05	100.49	2.75	15.86	4.24	1.49	81.63
2	52	1	61.5	17	21.5	58	20	76	31.7	1.5	5.09	1.43	3.8	0.69	575	1.51	200	36.3	54	9.5	155	66.1	0	0	0.61	18	5.3	2.14	1.97
2	52	2	303.21	25.06	26.4	81.06	43	82.51	27.01	1.55	5.5	1.23	2.9	0.8494	224.09	1.29	253.96	43.59	119.7	17.56	178.31	1316.28	0.05	100.49	2.75	15.86	4.24	1.49	81.63
2	52	2	303.21	25.06	26.4	81.06	43	82.51	27.01	1.55	5.5	1.23	2.9	0.8494	224.09	1.29	253.96	43.59	119.7	17.56	178.31	1316.28	0.05	100.49	2.75	15.86	4.24	1.49	81.63
1	52	2	303.21	26.7	19.4	79	31.7	89	25.3	1.7	4.79	0.92	3.32	1.11	99.7	1.05	253.96	43.59	119.7	17.56	178.31	1316.28	0.05	100.49	2.75	15.86	4.24	1.49	81.63
2	52	2	303.21	8	14	55	13	82.51	27.01	1.55	5.39	1.23	2.9	0.8494	224.09	1.29	253.96	43.59	119.7	17.56	178.31	1316.28	0.05	100.49	2.75	15.86	4.24	1.49	81.63
1	52	1	303.21	24	17	72	30	77	29.4	1.5	5.58	0.91	4.42	1.17	427	1.31	253.96	43.59	119.7	17.56	178.31	1316.28	0.05	100.49	2.75	15.86	4.24	1.49	81.63
2	52	0	303.21	22.1	21.8	61	22.6	76	32.3	1.2	4.27	0.88	2.69	1.1	66	1.05	253.96	43.59	119.7	17.56	178.31	1316.28	0.05	100.49	2.75	15.86	4.24	1.49	81.63
2	52	1	303.21	13	21	71	12	41	29.4	1.5	4.41	1.18	4.07	0.61	101	1.3	253.96	43.59	119.7	17.56	178.31	1316.28	0.05	100.49	2.75	15.86	4.24	1.49	81.63
1	52	0	303.21	14	26.2	71	55.2	82.51	23	1.9	4.65	1.23	2.9	0.8494	224.09	1.29	253.96	43.59	119.7	17.56	178.31	1316.28	0.05	100.49	2.75	15.86	4.24	1.49	81.63
2	52	3	303.21	11	18	55	15	62	31.5	1.5	4.79	1.23	2.9	0.74	346.2	1.3	253.96	43.59	119.7	17.56	178.31	1316.28	0.05	100.49	2.75	15.86	4.24	1.49	81.63
2	52	2	156.8	43	23	45	53	119	23.8	1.4	5.25	1.23	2.9	1.18	28.3	0.92	262	40	97	12	176	19	0.01	0	1.51	14	4.66	1.92	11.33
1	52	0	303.21	17	17.1	77	17.3	64	24.5	1.6	5.88	1.15	3.26	1.4	137	1.2	253.96	43.59	119.7	17.56	178.31	1316.28	0.05	100.49	2.75	15.86	4.24	1.49	81.63
2	52	2	303.21	10	18	81	11	82.51	27.01	1.55	5.2	1.23	2.9	0.8494	224.09	1.29	253.96	43.59	119.7	17.56	178.31	1316.28	0.05	100.49	2.75	15.86	4.24	1.49	81.63
2	52	1	303.21	14	21	47	25	54	30.4	1.5	5.94	1.23	2.9	0.8494	224.09	1.29	253.96	43.59	119.7	17.56	178.31	1316.28	0.05	100.49	2.75	15.86	4.24	1.49	81.63
1	52	2	303.21	15	22	69	22	48	24.7	1.7	4.32	1.23	2.9	0.79	650.5	1.35	253.96	43.59	119.7	17.56	178.31	1316.28	0.05	100.49	2.75	15.86	4.24	1.49	81.63
2	52	1	303.21	13	16	53	23	57	34.6	1.1	4.22	1.38	3.15	0.93	137	1.59	253.96	43.59	119.7	17.56	178.31	1316.28	0.05	100.49	2.75	15.86	4.24	1.49	81.63
2	52	1	303.21	10	17	68	12	31	24.3	1.9	4.55	1.23	2.9	0.35	255	1.96	253.96	43.59	119.7	17.56	178.31	1316.28	0.05	100.49	2.75	15.86	4.24	1.49	81.63
2	52	1	39.13	15	22	55	16	82.51	27.01	1.55	4.7	1.6	3.15	0.68	224.09	1.29	253.96	43.59	119.7	17.56	178.31	1316.28	0.05	100.49	2.75	15.86	4.24	1.49	81.63
2	52	1	303.21	25.06	26.4	81.06	43	82.51	27.01	1.55	5.5	1.23	2.9	0.8494	224.09	1.29	253.96	43.59	119.7	17.56	178.31	1316.28	0.05	100.49	2.75	15.86	4.24	1.49	81.63
2	52	1	303.21	20.3	22.9	69	22.6	61	33.2	1.4	4.92	1.31	3.54	1.15	60	1.51	253.96	43.59	119.7	17.56	178.31	1316.28	0.05	100.49	2.75	15.86	4.24	1.49	81.63
2	52	1	303.21	26	22	52	10	82.51	27.01	1.55	4.95	1.23	2.9	0.8494	224.09	1.29	253.96	43.59	119.7	17.56	178.31	1316.28	0.05	100.49	2.75	15.86	4.24	1.49	81.63
2	52	1	303.21	25.06	26.4	81.06	43	82.51	27.01	1.55	5.5	1.23	2.9	0.8494	224.09	1.29	253.96	43.59	119.7	17.56	178.31	1316.28	0.05	100.49	2.75	15.86	4.24	1.49	81.63
2	52	1	303.21	31	25	81.06	17	82.51	27.01	1.55	5.31	1.23	2.9	0.8494	224.09	1.29	253.96	43.59	119.7	17.56	178.31	1316.28	0.05	100.49	3.17	12.64	4.12	1.4	81.63
2	52	1	303.21	21	18	63	29	42	35	1.3	5.17	1.24	2.21	0.55	119	1.31	253.96	43.59	119.7	17.56	178.31	1316.28	0.05	100.49	3.96	14.8	4.43	1.93	81.63
1	52	0	303.21	25.06	26.4	81.06	43	82.51	27.01	1.55	5.5	1.23	2.9	0.8494	224.09	1.29	253.96	43.59	119.7	17.56	178.31	1316.28	0.05	100.49	2.75	15.86	4.24	1.49	81.63
2	52	2	303.21	32	29	48	22	82.51	27.01	1.55	5.5	1.23	2.9	0.8494	224.09	1.29	253.96	43.59	119.7	17.56	178.31	1316.28	0.05	100.49	2.75	15.86	4.24	1.49	81.63
2	52	1	303.21	20	21	61	19	82.51	27.01	1.55	4.82	1.56	3.71	0.93	224.09	1.29	253.96	43.59	119.7	17.56	178.31	1316.28	0.05	100.49	2.75	15.86	4.24	1.49	81.63
1	52	1	303.21	31	19	90	14	25	25.1	1.6	4.88	1.23	2.9	0.64	22.1	0.96	103	21	176	6	92	1316.28	0.05	100.49	2.75	15.86	4.24	1.49	3.5
2	52	0	303.21	25.06	26.4	81.06	43	82.51	27.01	1.55	5.5	1.23	2.9	0.8494	224.09	1.29	253.96	43.59	119.7	17.56	178.31	1316.28	0.05	100.49	2.75	15.86	4.24	1.49	81.63
2	52	0	303.21	9	15	63	14	60	29.9	1.4	4.34	1.23	2.9	0.8494	224.09	1.29	253.96	43.59	119.7	17.56	178.31	1316.28	0.05	100.49	2.75	15.86	4.24	1.49	81.63
2	52	2	303.21	15	16	58	17	82.51	27.01	1.55	4.95	1.77	3.93	0.95	224.09	1.29	253.96	43.59	119.7	17.56	178.31	1316.28	0.05	100.49	2.75	15.86	4.24	1.49	81.63
2	52	1	303.21	13	17	44	20	41	24.7	1.7	6.1	1.23	2.9	1.36	379.7	1.14	253.96	43.59	119.7	17.56	178.31	1316.28	0.05	100.49	2.75	15.86	4.24	1.49	81.63
1	52	3	303.21	26	20	66	13	75	23.1	1.9	4.75	0.71	2.11	0.87	73	1.18	253.96	43.59	119.7	17.56	178.31	1316.28	0.05	100.49	2.75	15.86	4.24	1.49	81.63
2	52	2	303.21	46	49	52	8	41	24.2	1.5	7.68	1.23	2.9	0.77	224.09	1.29	253.96	43.59	119.7	17.56	178.31	45.7	0	21.46	2.75	15.86	4.24	1.49	81.63
2	52	0	67.4	13	18	66	19.8	63	29.1	1.4	5.1	0.8	3.34	1.08	81	0.91	210	44.9	28	7	155	128.8	0.01	0	3.73	17.3	3.91	1.28	9.3
2	51	2	34	10	18	63	9.1	82.51	27.01	1.55	5.26	1.59	3.35	0.52	224.09	1.29	253.96	43.59	119.7	17.56	178.31	1316.28	0.05	100.49	2.75	15.86	4.24	1.49	81.63
1	51	0	303.21	28	25	75	24	77	23.6	1.7	5.15	1.23	2.9	1.02	36	1.05	253.96	43.59	119.7	17.56	178.31	1316.28	0.05	100.49	2.75	15.86	4.24	1.49	81.63
2	51	2	303.21	9	16	54	12	82.51	27.01	1.55	5.21	1.23	2.9	0.8494	224.09	1.29	253.96	43.59	119.7	17.56	178.31	1316.28	0.05	100.49	2.75	15.86	4.24	1.49	81.63
2	51	0	303.21	16	31	44	10	60	20.9	1.6	4.81	1.14	2.79	1.14	57	1.3	253.96	43.59	119.7	17.56	178.31	1316.28	0.05	100.49	2.75	15.86	4.24	1.49	81.63
2	51	0	303.21	12.7	17	52	15	82.51	27.01	1.55	5.84	1.44	3.33	0.68	224.09	1.29	253.96	43.59	119.7	17.56	178.31	1316.28	0.05	100.49	2.75	15.86	4.24	1.49	81.63
2	51	2	303.21	18	16	55	15.6	82.51	27.01	1.55	4.68	1.28	3.82	0.95	224.09	1.29	253.96	43.59	119.7	17.56	178.31	1316.28	0.05	100.49	2.75	15.86	4.24	1.49	81.63
2	51	1	303.21	55	36	66	110	47	29.9	1.4	4.97	0.78	2.64	0.63	115	1.23	253.96	43.59	119.7	17.56	178.31	1316.28	0.05	100.49	2.72	16.2	3.52	1.21	81.63
2	51	2	303.21	14	19	48	15	82.51	27.01	1.55	4.5	1.23	2.9	0.8494	224.09	1.29	253.96	43.59	119.7	17.56	178.31	1316.28	0.05	100.49	2.75	15.86	4.24	1.49	81.63
2	51	3	303.21	18.1	17.7	61	15.6	54	29.8	1.5	4.96	1.5	4.12	1.4	261	1.6	253.96	43.59	119.7	17.56	178.31	1316.28	0.05	100.49	2.75	15.86	4.24	1.49	81.63
2	51	2	303.21	11	16	82	13	82.51	27.01	1.55	4.71	1.23	2.47	0.62	224.09	1.29	176	31	65	9	127	1316.28	0.05	100.49	1.78	18.8	5.72	1.61	81.63
2	51	0	303.21	21.8	20.4	74	10.4	82.51	27.01	1.55	5.46	1.23	2.9	0.8494	224.09	1.29	253.96	43.59	119.7	17.56	178.31	1316.28	0.05	100.49	2.75	15.86	4.24	1.49	81.63
2	51	0	303.21	29	21	53	28	66	26.6	1.5	5.24	1.23	2.9	1.38	78.1	1.1	253.96	43.59	119.7	17.56	178.31	1316.28	0.05	100.49	2.7	16.99	4.29	1.3	81.63
2	51	2	303.21	27	25	42	11	57	23.8	1.8	6.75	1.23	2.9	0.8494	43.8	1.5	253.96	43.59	119.7	17.56	178.31	1316.28	0.05	100.49	2.77	16.45	4.81	1.57	81.63
2	51	0	303.21	28	30	54	20	82.51	27.01	1.55	5	1.23	2.9	0.8494	224.09	1.29	253.96	43.59	119.7	17.56	178.31	1316.28	0.05	100.49	2.75	15.86	4.24	1.49	81.63
2	51	1	303.21	25.06	26.4	81.06	43	82.51	27.01	1.55	5.5	1.23	2.9	0.8494	224.09	1.29	253.96	43.59	119.7	17.56	178.31	1316.28	0.05	100.49	2.75	15.86	4.24	1.49	81.63
2	51	2	303.21	17	24	49	24	78	26.9	1.8	5.6	1.23	2.9	0.91	21.3	1.29	253.96	43.59	119.7	17.56	178.31	1316.28	0.05	100.49	2.75	15.86	4.24	1.49	81.63
2	51	1	303.21	18	36	56	42	70	33.9	1.5	6.11	1.17	2.48	0.97	184.8	0.98	243	31	136	12	163	1316.28	0.05	100.49	4.23	15	4.73	2.23	2.06
2	51	0	303.21	25.06	26.4	81.06	43	82.51	27.01	1.55	5.5	1.23	2.9	0.8494	224.09	1.29	253.96	43.59	119.7	17.56	178.31	1316.28	0.05	100.49	2.15	16.3	5	1.71	81.63
2	51	1	303.21	14	17	60	19	38	27.4	1.7	5.43	1.23	2.9	1.07	14	1.82	253.96	43.59	119.7	17.56	178.31	1316.28	0.05	100.49	2.75	15.86	4.24	1.49	81.63
2	51	3	303.21	37	28	46	22	44	21.7	1.7	4.55	1.23	2.9	0.8494	81.4	1.3	132	22	106	6	112	1316.28	0.05	100.49	3.5	11.83	4.11	1.47	81.63
2	51	0	303.21	25.06	26.4	81.06	43	82.51	27.01	1.55	5.5	1.23	2.9	0.8494	224.09	1.29	253.96	43.59	119.7	17.56	178.31	1316.28	0.05	100.49	2.75	15.86	4.24	1.49	81.63
2	51	0	303.21	20	15	59	12	53	24.3	1.8	4.79	1.23	2.9	0.8494	148.4	1.3	253.96	43.59	119.7	17.56	178.31	1316.28	0.05	100.49	2.75	15.86	4.24	1.49	81.63
1	51	1	303.21	25.06	26.4	81.06	43	82.51	27.01	1.55	5.5	1.23	2.9	0.8494	224.09	1.29	253.96	43.59	119.7	17.56	178.31	1316.28	0.05	100.49	2.75	15.86	4.24	1.49	81.63
1	51	1	278.2	36	24	81	36	53	35	1.3	5.5	1.23	2.9	0.8494	101.9	1.9	253.96	43.59	119.7	17.56	178.31	1316.28	0.05	100.49	1.49	16.63	5.38	1.82	81.63
1	51	2	309.4	36.2	38.2	86	22.7	62	26.9	1.7	5.25	0.89	2.86	1.41	263	1.3	183	34.8	570	15	146	1316.28	0.05	100.49	1.63	18.37	6.3	2.2	81.63
1	51	1	226	19	18	65	28	71	25.2	1.8	4.34	1.23	2.9	0.72	37	1.35	253.96	43.59	119.7	17.56	178.31	1316.28	0.05	100.49	1.2	18.9	5.64	1.86	81.63
2	51	1	21.58	10	16	59	19	40	32.5	1.2	5.73	1.23	2.9	1.22	28.2	1.54	174	30	61	6	142	1316.28	0.05	100.49	1.4	16.16	4.82	2.01	81.63
2	51	2	303.21	14	15	68	23	82.51	27.01	1.55	5.08	1.23	2.9	0.8494	224.09	1.29	253.96	43.59	119.7	17.56	178.31	1316.28	0.05	100.49	5.13	17.1	4.76	2.06	81.63
2	51	3	303.21	55	39	55	31	82.51	28.4	1.6	6.51	1.66	3.28	0.98	224.09	1.29	253.96	43.59	119.7	17.56	178.31	1316.28	0.05	100.49	1.69	13.6	4.73	2.09	81.63
2	51	0	303.21	17	15	45	31	60	27.7	1.4	5.26	1.25	3.22	1	293	1.41	253.96	43.59	119.7	17.56	178.31	1316.28	0.05	100.49	2.75	15.86	4.24	1.49	81.63
2	51	2	303.21	25.06	26.4	81.06	43	82.51	27.01	1.55	5.5	1.23	2.9	0.8494	224.09	1.29	253.96	43.59	119.7	17.56	178.31	1316.28	0.05	100.49	2.75	15.86	4.24	1.49	81.63
2	51	2	303.21	19	19	45	11	58	28.7	1.4	4.48	1.43	3.88	0.63	79	1.48	253.96	43.59	119.7	17.56	178.31	1316.28	0.05	100.49	2.75	15.86	4.24	1.49	81.63
2	51	1	303.21	12	14	74	14	82.51	27.01	1.55	5.31	1.23	2.9	0.8494	224.09	1.29	253.96	43.59	119.7	17.56	178.31	1316.28	0.05	100.49	2.75	15.86	4.24	1.49	81.63
2	51	1	303.21	11	15	63	10	55	30.2	1.4	4.74	1.23	2.9	0.8494	564.4	1.4	253.96	43.59	119.7	17.56	178.31	1316.28	0.05	100.49	2.75	15.86	4.24	1.49	81.63
1	51	0	426.3	40	30	79	22	75	21.6	2	5.27	1.23	2.9	0.8494	42.2	1.2	253.96	43.59	119.7	17.56	178.31	1316.28	0.05	100.49	1.49	13.98	4.3	1.73	81.63
2	51	0	303.21	8	14	50	12	40	21.6	2.3	4.74	1.23	2.9	1.03	96	1.38	253.96	43.59	119.7	17.56	178.31	1316.28	0.05	100.49	2.75	15.86	4.24	1.49	81.63
2	51	2	303.21	8	14	53	14	82.51	27.01	1.55	4.98	1.23	2.9	0.8494	224.09	1.29	253.96	43.59	119.7	17.56	178.31	1316.28	0.05	100.49	2.75	15.86	4.24	1.49	81.63
2	51	0	303.21	9	15	49	20	43	27.7	1.7	5.11	1.62	2.84	0.39	63	1.63	128	27	68	30	105	1316.28	0.05	100.49	2.75	15.86	4.24	1.49	81.63
1	51	3	9.19	15	25	71	64	62	23.5	1.8	3.88	1.23	2.9	0.87	145	0.91	202	41	153	9	156	1527	0.02	162.6	3.2	19.28	4.51	1.69	9.53
1	51	1	303.21	55.8	35	87	130.7	82.51	27.4	1.5	6.42	0.94	3.25	0.96	224.09	1.29	253.96	43.59	119.7	17.56	178.31	1316.28	0.05	100.49	2.75	15.86	4.24	1.49	18.79
1	51	1	303.21	39	27	65	55	53	29.1	1.7	5.2	1.27	3.71	1.23	213	1.37	253.96	43.59	119.7	17.56	178.31	1316.28	0.05	100.49	2.75	15.86	4.24	1.49	81.63
2	51	3	303.21	6	14	38	14	29	24.1	2	5.05	1.23	2.9	0.8494	88.3	1.1	253.96	43.59	119.7	17.56	178.31	1316.28	0.05	100.49	2.75	15.86	4.24	1.49	81.63
2	51	1	303.21	13	14	54	15	58	35	1.4	4.59	1.24	2.78	0.87	77	1.43	253.96	43.59	119.7	17.56	178.31	1316.28	0.05	100.49	2.75	15.86	4.24	1.49	81.63
2	51	0	303.21	25.06	26.4	81.06	43	82.51	27.01	1.55	5.5	1.23	2.9	0.8494	224.09	1.29	253.96	43.59	119.7	17.56	178.31	1316.28	0.05	100.49	2.75	15.86	4.24	1.49	81.63
2	51	1	303.21	18	19	65	28	82.51	27.01	1.55	4.78	1.23	2.9	0.8494	224.09	1.29	253.96	43.59	119.7	17.56	178.31	1316.28	0.05	100.49	2.75	15.86	4.24	1.49	81.63
2	51	0	303.21	15	14	54	13	82.51	27.01	1.55	5.47	1.23	2.9	0.8494	224.09	1.29	253.96	43.59	119.7	17.56	178.31	1316.28	0.05	100.49	2.75	15.86	4.24	1.49	81.63
1	51	0	303.21	25.06	26.4	81.06	43	82.51	27.01	1.55	5.5	1.23	2.9	0.8494	224.09	1.29	253.96	43.59	119.7	17.56	178.31	1316.28	0.05	100.49	2.75	15.86	4.24	1.49	81.63
2	51	0	303.21	18	22	65	18	38	26.9	1.7	5.61	1.82	2.56	0.33	43	1.9	202	30	84	11	152	1316.28	0.05	100.49	2.18	17.4	4.59	1.65	81.63
2	51	0	303.21	17	17	63	15	82.51	27.01	1.55	5.28	1.09	2.31	0.71	224.09	1.29	253.96	43.59	119.7	17.56	178.31	1316.28	0.05	100.49	2.75	15.86	4.24	1.49	81.63
2	51	2	303.21	12	17	54	10.2	62	28.3	1.6	4.27	1.86	3.28	0.64	217	1.83	253.96	43.59	119.7	17.56	178.31	1316.28	0.05	100.49	1.46	16	4.94	1.66	81.63
2	51	0	19.09	17	13	64	27	48	26.4	1.5	4.6	1.23	2.9	1.06	248.1	0.84	125	20	64	6	95	18.6	0	0	2.65	12.73	3.78	1.18	81.63
2	51	0	303.21	12.9	17.7	54	24.5	52	23.4	1.9	4.63	1.07	4.15	1.31	205	1.23	253.96	43.59	119.7	17.56	178.31	1316.28	0.05	100.49	1.29	12.5	4.37	1.74	81.63
2	51	2	303.21	25.06	26.4	81.06	43	82.51	27.01	1.55	5.5	1.23	2.9	0.8494	224.09	1.29	253.96	43.59	119.7	17.56	178.31	1316.28	0.05	100.49	2.75	15.86	4.24	1.49	81.63
1	51	2	303.21	27	24	69	44	75	26.7	1.6	4.73	1.09	2.56	0.65	88	1.37	253.96	43.59	119.7	17.56	178.31	1316.28	0.05	100.49	2.75	15.86	4.24	1.49	81.63
2	51	0	303.21	43	21	54	24	82.51	27.01	1.55	5.55	1.23	2.9	0.58	224.09	1.29	253.96	43.59	119.7	17.56	178.31	1316.28	0.05	100.49	2.75	15.86	4.24	1.49	81.63
2	51	1	303.21	16	18	79	16	71	27.8	1.4	5.49	1.24	3.27	0.71	50	1.53	253.96	43.59	119.7	17.56	178.31	1316.28	0.05	100.49	2.75	15.86	4.24	1.49	81.63
2	51	0	303.21	12.9	16.9	57	14.2	81	21.3	1.9	4.5	1.4	1.96	0.51	98	1.52	253.96	43.59	119.7	17.56	178.31	1316.28	0.05	100.49	2.75	15.86	4.24	1.49	81.63
2	51	2	303.21	17	26	62	10	82.51	27.01	1.55	5	1.23	2.9	0.87	224.09	1.29	253.96	43.59	119.7	17.56	178.31	1316.28	0.05	100.49	2.75	15.86	4.24	1.49	81.63
2	51	0	303.21	25.06	26.4	81.06	43	82.51	27.01	1.55	5.5	1.23	2.9	0.8494	224.09	1.29	253.96	43.59	119.7	17.56	178.31	1316.28	0.05	100.49	2.75	15.86	4.24	1.49	81.63
2	51	2	303.21	18	24	53	16	82.51	27.01	1.55	4.59	1.23	2.9	0.65	224.09	1.29	253.96	43.59	119.7	17.56	178.31	1316.28	0.05	100.49	2.75	15.86	4.24	1.49	81.63
2	51	1	303.21	28	29	60	28	82.51	27.01	1.55	5.77	1.23	2.9	0.8494	224.09	1.29	253.96	43.59	119.7	17.56	178.31	1316.28	0.05	100.49	0.41	13.05	3.52	1.51	81.63
2	51	2	303.21	95	76	48	147.8	72	22.4	1.6	4.42	1.07	2.48	1.02	55	1.51	253.96	43.59	119.7	17.56	178.31	1316.28	0.05	100.49	2.75	15.86	4.24	1.49	81.63
2	51	1	303.21	19	17	67	13	37	25.2	1.7	4.78	1.57	3.81	0.42	196	1.54	253.96	43.59	119.7	17.56	178.31	30.8	0.01	21.43	3.8	19.3	3.86	1.54	81.63
2	51	1	303.21	12	17	51	10	32	29.4	1.5	5.72	1.33	4.43	0.89	287	1.45	139	28	45	9	107	1316.28	0.05	100.49	2.75	15.86	4.24	1.49	81.63
2	51	2	303.21	25.06	26.4	81.06	43	82.51	27.01	1.55	5.5	1.23	2.9	0.8494	224.09	1.29	253.96	43.59	119.7	17.56	178.31	1316.28	0.05	100.49	2.75	15.86	4.24	1.49	81.63
2	51	1	303.21	13	18	74	9	52	29.2	1.6	5.08	1.84	3.52	0.48	36	1.76	253.96	43.59	119.7	17.56	178.31	1316.28	0.05	100.49	2.75	15.86	4.24	1.49	81.63
2	51	2	303.21	12	13	53	13	40	29.9	1.5	4.49	1.6	2.03	0.39	41	1.64	253.96	43.59	119.7	17.56	178.31	1316.28	0.05	100.49	2.75	15.86	4.24	1.49	81.63
2	51	2	303.21	13	16	45	12	82.51	27.01	1.55	5.23	1.23	2.9	0.83	224.09	1.29	253.96	43.59	119.7	17.56	178.31	1316.28	0.05	100.49	2.75	15.86	4.24	1.49	81.63
1	51	1	303.21	63	28	66	45	59	25.1	1.6	5.07	0.92	2.7	0.81	93	1.04	177	23	31	5	116	0	0.01	0	2.75	15.86	4.24	1.49	81.63
2	51	0	303.21	25.06	26.4	81.06	43	82.51	27.01	1.55	5.5	1.23	2.9	0.8494	224.09	1.29	253.96	43.59	119.7	17.56	178.31	1316.28	0.05	100.49	2.75	15.86	4.24	1.49	81.63
2	51	1	303.21	19	26	61	18	82.51	27.01	1.55	5.5	1.23	2.9	0.8494	224.09	1.29	170	29	73	9	134	1316.28	0.05	100.49	1.79	15.9	3.89	1.12	81.63
2	51	0	303.21	25.06	26.4	81.06	43	82.51	27.01	1.55	6.37	1.23	2.9	0.8494	224.09	1.29	253.96	43.59	119.7	17.56	178.31	1316.28	0.05	100.49	2.75	15.86	4.24	1.49	81.63
2	51	1	77.46	30	25	59	31	17	26.7	1.7	5.46	1.23	2.9	1.82	29.2	1.14	253.96	43.59	119.7	17.56	178.31	1316.28	0.05	100.49	2.74	16.08	4.34	1.61	81.63
2	51	3	303.21	29	23	56	18.7	82.51	27.01	1.55	5.86	1.37	1.8	0.45	224.09	1.29	241	35.9	94	10	160	1316.28	0.05	100.49	2.75	15.86	4.24	1.49	81.63
2	51	2	303.21	90	50	42	129	55	24.4	1.6	5.17	1.41	2.91	0.58	5	1.53	253.96	43.59	119.7	17.56	178.31	1316.28	0.05	100.49	2.75	15.86	4.24	1.49	81.63
2	51	3	303.21	9	14	60	7	28	20.3	1.7	4.46	1.23	2.9	0.8494	79.6	1.2	253.96	43.59	119.7	17.56	178.31	1316.28	0.05	100.49	2.75	15.86	4.24	1.49	81.63
1	51	0	303.21	11	22	81	12	55	23.1	1.5	5.35	1.11	2.16	0.4	154	1.31	155	29	75	13	116	14.3	0.01	40.02	2.75	15.86	4.24	1.49	81.63
2	51	0	303.21	19	15	57	12	75	28.8	1.7	5.07	1.64	3.59	0.66	116	1.69	253.96	43.59	119.7	17.56	178.31	1316.28	0.05	100.49	2.75	15.86	4.24	1.49	81.63
2	51	1	303.21	47	23	70	30	82.51	27.01	1.55	4.9	1.23	2.9	0.8494	224.09	1.29	253.96	43.59	119.7	17.56	178.31	1316.28	0.05	100.49	2.75	15.86	4.24	1.49	81.63
2	51	0	303.21	25.06	26.4	81.06	43	82.51	27.01	1.55	5.5	1.23	2.9	0.8494	224.09	1.29	253.96	43.59	119.7	17.56	178.31	1316.28	0.05	100.49	2.75	15.86	4.24	1.49	81.63
2	51	1	303.21	47.9	28.5	65	30.9	66	22.5	1.7	4.64	1.18	3.31	0.9	146	1.26	253.96	43.59	119.7	17.56	178.31	1316.28	0.05	100.49	2.75	15.86	4.24	1.49	81.63
2	51	2	303.21	14	20	57	11	82.51	27.01	1.55	5.27	1.23	2.9	0.83	224.09	1.29	253.96	43.59	119.7	17.56	178.31	1316.28	0.05	100.49	2.75	15.86	4.24	1.49	81.63
2	51	3	303.21	25.06	26.4	81.06	43	82.51	27.01	1.55	5.5	1.23	2.9	0.8494	224.09	1.29	253.96	43.59	119.7	17.56	178.31	1316.28	0.05	100.49	2.75	15.86	4.24	1.49	81.63
2	51	0	303.21	7	15	55	13	82.51	27.01	1.55	5.5	1.23	2.9	0.79	224.09	1.29	253.96	43.59	119.7	17.56	178.31	1316.28	0.05	100.49	2.75	15.86	4.24	1.49	81.63
1	51	1	303.21	22	20	71	25	110	31.2	1.3	4.2	1.23	2.9	0.7	104.3	1.63	253.96	43.59	119.7	17.56	178.31	1316.28	0.05	100.49	2.75	15.86	4.24	1.49	81.63
2	51	1	303.21	25.06	26.4	81.06	43	82.51	27.01	1.55	5.5	1.23	2.9	0.8494	224.09	1.29	253.96	43.59	119.7	17.56	178.31	1316.28	0.05	100.49	2.75	15.86	4.24	1.49	81.63
2	51	1	303.21	23	28	58	8	82.51	27.01	1.55	4.88	1.23	2.9	0.55	224.09	1.29	253.96	43.59	119.7	17.56	178.31	1316.28	0.05	100.49	2.75	15.86	4.24	1.49	81.63
1	51	0	303.21	26.2	31.9	72	52.7	82.51	32.3	1.5	5.78	1.23	2.9	0.8494	224.09	1.29	253.96	43.59	119.7	17.56	178.31	1316.28	0.05	100.49	2.75	15.86	4.24	1.49	81.63
2	51	1	303.21	36	43	72	17	49	32.3	1.3	7.28	1.23	2.9	0.99	287.2	1.3	253.96	43.59	119.7	17.56	178.31	1316.28	0.05	100.49	2.75	15.86	4.24	1.49	81.63
2	51	2	303.21	25.06	26.4	81.06	43	82.51	27.01	1.55	5.5	1.23	2.9	0.8494	224.09	1.29	253.96	43.59	119.7	17.56	178.31	1316.28	0.05	100.49	2.75	15.86	4.24	1.49	81.63
2	51	1	303.21	13	21	45	43	82.51	27.01	1.55	5.5	1.23	2.9	0.8494	224.09	1.29	172	43	84	9	142	1316.28	0.05	100.49	2.75	15.86	4.24	1.49	81.63
1	51	0	303.21	21.6	19.7	85	37.3	95	31.3	1.4	5.35	0.99	3.28	1.34	129	1.31	253.96	43.59	119.7	17.56	178.31	1316.28	0.05	100.49	2.75	15.86	4.24	1.49	81.63
2	51	3	303.21	25.06	26.4	81.06	43	82.51	27.01	1.55	5.5	1.23	2.9	0.8494	224.09	1.29	253.96	43.59	119.7	17.56	178.31	1316.28	0.05	100.49	2.75	15.86	4.24	1.49	81.63
2	51	0	303.21	25.06	26.4	81.06	43	82.51	27.01	1.55	5.5	1.23	2.9	0.8494	224.09	1.29	253.96	43.59	119.7	17.56	178.31	1316.28	0.05	100.49	2.75	15.86	4.24	1.49	81.63
2	51	0	15.9	16	26.4	81.06	43	82.51	27.01	1.55	5.5	1.23	2.9	0.8494	224.09	1.29	248	43.59	119.7	17.56	178.31	1316.28	0.05	100.49	2.75	15.86	4.24	1.49	81.63
2	51	2	303.21	25.7	23.2	44	43	82.51	27.01	1.55	4.78	1.23	2.9	0.8494	224.09	1.29	176	28.1	81	12.4	131	35.4	0	0	2.75	15.86	4.24	1.49	14.13
2	51	0	303.21	13	16	56	8	82.51	27.01	1.55	5.16	1.23	2.9	0.69	224.09	1.29	253.96	43.59	119.7	17.56	178.31	1316.28	0.05	100.49	2.75	15.86	4.24	1.49	81.63
2	51	2	303.21	5	14	63	13	82.51	27.01	1.55	5.08	1.23	2.9	0.8494	224.09	1.29	253.96	43.59	119.7	17.56	178.31	1316.28	0.05	100.49	2.75	15.86	4.24	1.49	81.63
2	51	1	208.5	81	43	59	39	69	26.9	1.6	5.79	1.23	2.9	1.11	224.09	1.29	253.96	43.59	119.7	17.56	178.31	1316.28	0.05	100.49	2.75	15.86	4.24	1.49	81.63
2	51	1	303.21	30	22	43	43	82.51	27.01	1.55	4.45	1.23	2.9	0.8494	224.09	1.29	199	30	84	12	142	1316.28	0.05	100.49	2.75	15.86	4.24	1.49	81.63
2	51	2	49.8	15	18	53	16	53	34.6	1.2	5.58	1.36	3.04	0.93	262	1.6	253.96	43.59	119.7	17.56	178.31	1316.28	0.05	100.49	5.37	13.5	4.4	1.6	81.63
2	51	2	303.21	25.06	26.4	81.06	43	82.51	27.01	1.55	5.5	1.23	2.9	0.8494	224.09	1.29	253.96	43.59	119.7	17.56	178.31	1316.28	0.05	100.49	2.75	15.86	4.24	1.49	81.63
2	50	0	303.21	14	13	44	16	82.51	27.01	1.55	5.55	1.23	2.9	0.8494	224.09	1.29	253.96	43.59	119.7	17.56	178.31	1316.28	0.05	100.49	2.75	15.86	4.24	1.49	81.63
2	50	2	303.21	25.06	26.4	81.06	43	82.51	27.01	1.55	5.19	1.23	2.9	0.8494	224.09	1.29	253.96	43.59	119.7	17.56	178.31	1316.28	0.05	100.49	2.75	15.86	4.24	1.49	81.63
2	50	1	303.21	61	67	48	65	82.51	27.01	1.55	6.82	1.23	2.9	1.28	224.09	1.29	253.96	43.59	119.7	17.56	178.31	1316.28	0.05	100.49	2.75	15.86	4.24	1.49	81.63
1	50	3	303.21	18	11	60	106	165	30.4	1.2	4.93	0.69	2.57	0.98	51	0.8	250	39	32	4	175	465.1	0.03	0	2.75	15.86	4.24	1.49	27.41
1	50	2	303.21	26	18	92	39	82.51	27.01	1.55	4.98	1.23	2.9	0.8494	224.09	1.29	253.96	43.59	119.7	17.56	178.31	1316.28	0.05	100.49	2.75	15.86	4.24	1.49	81.63
2	50	0	303.21	10	10	65	14	80	30.4	1.3	6.62	1.23	2.9	0.8494	224.09	1.29	253.96	43.59	119.7	17.56	178.31	1316.28	0.05	100.49	2.75	15.86	4.24	1.49	81.63
1	50	1	303.21	14	18	109	13	50	29.5	1.3	5.32	1.23	2.9	0.8494	224.09	1.29	164	26	58	9	126	366.5	0.03	34.88	2.75	15.86	4.24	1.49	81.63
1	50	0	303.21	37	31	69	97	82.51	27.01	1.55	6.65	1.23	2.9	0.8494	224.09	1.29	253.96	43.59	119.7	17.56	178.31	1316.28	0.05	100.49	2.75	15.86	4.24	1.49	81.63
2	50	3	303.21	25.06	26.4	81.06	43	82.51	27.01	1.55	5.5	1.23	2.9	0.8494	224.09	1.29	253.96	43.59	119.7	17.56	178.31	1316.28	0.05	100.49	2.75	15.86	4.24	1.49	81.63
2	50	2	303.21	25.06	26.4	81.06	43	82.51	27.01	1.55	5.5	1.23	2.9	0.8494	224.09	1.29	253.96	43.59	119.7	17.56	178.31	1316.28	0.05	100.49	2.75	15.86	4.24	1.49	81.63
2	50	2	303.21	21	22	51	16	82.51	27.01	1.55	4.76	1.23	2.9	0.8494	224.09	1.29	253.96	43.59	119.7	17.56	178.31	1316.28	0.05	100.49	2.75	15.86	4.24	1.49	81.63
2	50	2	303.21	14	17	73	19	82.51	27.01	1.55	4.98	1.23	2.9	0.8494	224.09	1.29	253.96	43.59	119.7	17.56	178.31	1316.28	0.05	100.49	2.75	15.86	4.24	1.49	81.63
1	50	2	303.21	18.1	17.4	90	25.6	56	23.9	1.9	5.11	0.99	2.93	1.13	79	1.23	157	28.3	200	9	127	1316.28	0.05	100.49	2.75	15.86	4.24	1.49	81.63
2	50	0	303.21	18	19	67	20	82.51	27.01	1.55	5.74	1.23	2.9	0.5	224.09	1.29	253.96	43.59	119.7	17.56	178.31	1316.28	0.05	100.49	2.75	15.86	4.24	1.49	81.63
2	50	1	154.9	34	17	53	31	60	36.3	1.2	6.34	1.23	2.9	1.5	224.09	1.29	166	25	121	5	113	25.4	0.01	28.66	2.75	15.86	4.24	1.49	3.39
1	50	0	242	42	29	83	30.3	87	30.6	1.6	4.94	1.85	3.08	0.78	9	1.83	181	28	218	10	139	15.1	0.01	22.18	0.19	16.6	4.44	1.65	81.63
2	50	1	283.9	20	21	60	22	53	28.2	1.6	4.98	1.23	2.9	1.06	34.1	1.18	156	30	72	7	129	116.8	0	29.15	1.33	12.62	4.26	1.16	81.63
2	50	2	174	11	13	56	26	82.51	30.7	1.4	5.34	1.23	2.9	0.61	224.09	1.29	174	29	66	8	115	1316.28	0.05	100.49	2.12	19.99	4.07	1.26	81.63
2	50	2	303.21	25.06	26.4	81.06	43	82.51	27.01	1.55	5.5	1.23	2.9	0.8494	224.09	1.29	253.96	43.59	119.7	17.56	178.31	1316.28	0.05	100.49	2.75	15.86	4.24	1.49	81.63
2	50	2	31.13	20	24	52	13	82.51	27.01	1.55	5.5	1.23	2.9	0.8494	224.09	1.29	253.96	43.59	119.7	17.56	178.31	1316.28	0.05	100.49	2.75	15.86	4.24	1.49	81.63
2	50	0	303.21	18	22	68	24	82.51	27.01	1.55	4.88	1.16	2.33	0.82	224.09	1.29	253.96	43.59	119.7	17.56	178.31	1316.28	0.05	100.49	2.75	15.86	4.24	1.49	81.63
1	50	2	165	13.3	15.5	67	15.9	57	28.9	1.6	5.9	1.06	2.94	1.13	25	1.19	253.96	43.59	119.7	17.56	178.31	1316.28	0.05	100.49	2.75	15.86	4.24	1.49	81.63
1	50	1	303.21	29	17	103	42	82.51	23.3	2.1	5.43	1.23	2.9	0.8494	224.09	1.29	253.96	43.59	119.7	17.56	178.31	1316.28	0.05	100.49	2.75	15.86	4.24	1.49	81.63
2	50	3	62.4	45	23	59	12	30	25.6	1.3	4.37	1.08	3.23	0.64	53	1.13	192	32	37	10	149	97.7	0.01	26.19	0.34	17	2.1	0.82	26.75
2	50	2	303.21	14	15	84	17	82.51	27.01	1.55	4.93	1.23	2.9	0.8494	224.09	1.29	253.96	43.59	119.7	17.56	178.31	1316.28	0.05	100.49	2.75	15.86	4.24	1.49	81.63
1	50	1	303.21	25.06	26.4	81.06	43	82.51	27.01	1.55	5.5	1.23	2.9	0.8494	224.09	1.29	253.96	43.59	119.7	17.56	178.31	1316.28	0.05	100.49	2.75	15.86	4.24	1.49	81.63
1	50	0	758	23	20	75	24	58	27	1.6	5.13	1.04	2.38	0.75	398	1.32	150	29	55	8	121	0	0.01	22.49	2.5	18.6	4.64	1.6	7.04
2	50	0	303.21	25.06	26.4	81.06	43	82.51	27.01	1.55	5.5	1.23	2.9	0.8494	224.09	1.29	253.96	43.59	119.7	17.56	178.31	1316.28	0.05	100.49	2.75	15.86	4.24	1.49	81.63
2	50	1	303.21	25.06	26.4	81.06	43	82.51	27.01	1.55	5.5	1.23	2.9	0.8494	224.09	1.29	253.96	43.59	119.7	17.56	178.31	1316.28	0.05	100.49	2.75	15.86	4.24	1.49	81.63
2	50	2	303.21	25.5	22.1	101	21.6	56	25.6	1.9	4.96	1.18	1.71	0.69	26	1.36	253.96	43.59	119.7	17.56	178.31	1316.28	0.05	100.49	1.23	12.9	4.75	2.04	81.63
2	50	0	22.7	25.06	26.4	81.06	43	82.51	27.01	1.55	5.5	1.23	2.9	0.8494	224.09	1.29	253.96	43.59	119.7	17.56	178.31	1316.28	0.05	100.49	0.7	15.8	5.61	1.72	81.63
2	50	0	303.21	26	20	50	22	81	27.3	1.6	5.28	1.23	2.9	0.74	70	1.32	253.96	43.59	119.7	17.56	178.31	1316.28	0.05	100.49	2.75	15.86	4.24	1.49	81.63
2	50	1	303.21	9	17	64	11	82.51	27.01	1.55	4.5	1.23	2.9	0.64	224.09	1.29	253.96	43.59	119.7	17.56	178.31	1316.28	0.05	100.49	1.78	13.6	4.35	1.68	81.63
2	50	0	303.21	13	18	61	27	82.51	27.01	1.55	5.2	1.23	2.9	0.8494	224.09	1.29	253.96	43.59	119.7	17.56	178.31	1316.28	0.05	100.49	2.75	15.86	4.24	1.49	81.63
2	50	1	303.21	11	16	46	11	38	27.7	1.5	4.81	1.25	1.86	0.44	56	1.46	253.96	43.59	119.7	17.56	178.31	1316.28	0.05	100.49	2.75	15.86	4.24	1.49	81.63
2	50	0	303.21	28	34	54	16	43	33.3	1.4	5.16	1.23	2.9	0.47	78	1.68	253.96	43.59	119.7	17.56	178.31	79.2	0.01	0	4.75	15.2	3.46	1.13	81.63
1	50	2	303.21	27	17	70	25	69	28.1	1.6	5.06	0.68	3.52	1.2	39	0.97	253.96	43.59	119.7	17.56	178.31	1316.28	0.05	100.49	2.75	15.86	4.24	1.49	81.63
2	50	0	95.8	34	23	53	23	62	24	1.6	5.37	1.38	2.68	0.72	318.7	1.4	253.96	43.59	119.7	17.56	178.31	1316.28	0.05	100.49	2.75	15.86	4.24	1.49	2.35
2	50	3	303.21	9	16	69	13	47	29.8	1.6	4.66	1.23	2.9	0.39	73	2.02	253.96	43.59	119.7	17.56	178.31	1316.28	0.05	100.49	2.75	15.86	4.24	1.49	81.63
2	50	2	303.21	20	17	58	15	82.51	27.01	1.55	5.45	1.23	2.9	1.02	224.09	1.29	253.96	43.59	119.7	17.56	178.31	1316.28	0.05	100.49	2.75	15.86	4.24	1.49	81.63
2	50	3	303.21	2	13	58	13	82.51	27.01	1.55	5.2	1.23	2.9	0.79	224.09	1.29	253.96	43.59	119.7	17.56	178.31	1316.28	0.05	100.49	2.75	15.86	4.24	1.49	81.63
2	50	2	303.21	37	15	81.06	104	47	20.9	2.3	5.5	1.23	2.9	0.8494	224.09	1.29	253.96	43.59	119.7	17.56	178.31	1316.28	0.05	100.49	2.75	15.86	4.24	1.49	81.63
2	50	0	303.21	17	26	64	15	82.51	27.01	1.55	4.94	1.23	2.9	0.83	224.09	1.29	253.96	43.59	119.7	17.56	178.31	1316.28	0.05	100.49	2.75	15.86	4.24	1.49	81.63
2	50	1	303.21	23	13	79	19	44	21.4	1.7	4.66	1.23	2.9	1.27	19.3	1.1	253.96	43.59	119.7	17.56	178.31	1316.28	0.05	100.49	2.75	15.86	4.24	1.49	81.63
2	50	1	303.21	10	21	53	22.7	50	23.9	1.5	4.2	1.21	2.42	0.57	578	1.39	253.96	43.59	119.7	17.56	178.31	1316.28	0.05	100.49	2.75	15.86	4.24	1.49	81.63
1	50	1	303.21	14	15	74	24	55	23	2.1	5.49	1.23	2.9	0.8494	40.8	1.7	253.96	43.59	119.7	17.56	178.31	1316.28	0.05	100.49	1.15	15.9	4.57	1.39	81.63
1	50	0	303.21	15	18	66	43	82.51	27.01	1.55	5.53	1.23	2.9	0.8494	224.09	1.29	166	28	101	11	118	1316.28	0.05	100.49	2.75	15.86	4.24	1.49	81.63
1	50	0	198.8	22	17	69	26	53	23.1	2	4.71	1.23	2.9	0.99	155	1.14	198	34	58	15	150	27.8	0	23.22	0.55	22.05	5.36	1.75	81.63
1	50	2	303.21	31	27	60	20	95	27.4	1.6	4.83	1.39	2.29	0.81	79	1.67	253.96	43.59	119.7	17.56	178.31	1316.28	0.05	100.49	2.75	15.86	4.24	1.49	81.63
2	50	0	303.21	25.06	26.4	81.06	43	82.51	27.01	1.55	5.5	1.23	2.9	0.8494	224.09	1.29	253.96	43.59	119.7	17.56	178.31	1316.28	0.05	100.49	2.75	15.86	4.24	1.49	81.63
2	50	1	80.6	13	18	43	20	75	21.7	1.9	5.1	1.28	3.18	0.63	182	1.41	253.96	43.59	119.7	17.56	178.31	0	0	0	2.27	15.7	5.45	2.25	81.63
2	50	1	303.21	21	17	59	10	34	18.8	2.1	5.84	1.23	2.9	1.03	204	0.94	253.96	43.59	119.7	17.56	178.31	1316.28	0.05	100.49	2.05	14.16	3.8	1.34	81.63
2	50	2	303.21	11	17	60	22	82.51	27.01	1.55	5.04	1.23	2.9	1.6	224.09	1.29	253.96	43.59	119.7	17.56	178.31	1316.28	0.05	100.49	2.75	15.86	4.24	1.49	81.63
2	50	0	615	15	16	61	24	74	27.6	1.7	5.23	1.23	2.9	1.39	568.4	1.46	151	27	63	8	118	21.2	0	0	4.67	14	5.01	1.85	81.63
2	50	2	303.21	40	27	64	58	78	23.2	1.9	5.38	0.98	2.56	1.02	34	1.32	253.96	43.59	119.7	17.56	178.31	1316.28	0.05	100.49	2.75	15.86	4.24	1.49	81.63
2	50	0	303.21	25.06	26.4	81.06	43	82.51	27.01	1.55	5.5	1.23	2.9	0.8494	224.09	1.29	253.96	43.59	119.7	17.56	178.31	1316.28	0.05	100.49	6.81	17.5	4.67	1.84	81.63
2	50	1	303.21	20.9	17.6	41	18.9	53	30.7	1.3	6.03	1.16	2.75	0.62	706	1.3	253.96	43.59	119.7	17.56	178.31	1316.28	0.05	100.49	2.75	15.86	4.24	1.49	81.63
1	50	2	303.21	17	16	65	41.9	63	26	1.7	4.77	1.12	3.25	0.88	37	1.38	253.96	43.59	119.7	17.56	178.31	1316.28	0.05	100.49	2.75	15.86	4.24	1.49	81.63
2	50	0	303.21	16	29	53	32	82.51	20.4	2	4.85	1.23	2.9	0.8494	224.09	1.29	253.96	43.59	119.7	17.56	178.31	0	0	0	2.75	15.86	4.24	1.49	81.63
1	50	0	95.2	105	67	86	59	48	24.9	1.7	5.61	1.23	2.9	0.8494	224.09	1.29	169	32	89	7	155	1316.28	0.05	100.49	3.76	15.89	5.11	1.67	9.31
2	50	0	303.21	18	18.7	47	10.4	80	23.8	1.6	4.77	1.69	2.01	0.39	35.4	1.64	253.96	43.59	119.7	17.56	178.31	1316.28	0.05	100.49	2.75	15.86	4.24	1.49	81.63
2	50	2	303.21	24	16	41	33	67	22.9	1.6	6.27	1.46	3.35	1.23	58	1.65	253.96	43.59	119.7	17.56	178.31	1316.28	0.05	100.49	2.75	15.86	4.24	1.49	81.63
1	50	2	303.21	34	30	81	35	64	26.8	1.7	5	1.23	2.9	0.81	204	1.67	253.96	43.59	119.7	17.56	178.31	1316.28	0.05	100.49	2.75	15.86	4.24	1.49	81.63
2	50	0	303.21	9	14	58	14	36	20	1.6	4.55	1.23	2.9	1.28	196.8	1.38	253.96	43.59	119.7	17.56	178.31	1316.28	0.05	100.49	2.75	15.86	4.24	1.49	81.63
2	50	2	303.21	17	22	60	22	82.51	27.01	1.55	4.75	1.23	2.9	1.47	224.09	1.29	253.96	43.59	119.7	17.56	178.31	1316.28	0.05	100.49	2.75	15.86	4.24	1.49	81.63
2	50	2	303.21	26	26	59	33	75	36	1.3	6.44	1.23	2.9	0.86	471	1.02	253.96	43.59	119.7	17.56	178.31	1316.28	0.05	100.49	1.3	17.9	4.89	2.02	34.03
2	50	0	303.21	12	17	47	18	82.51	27.01	1.55	4.71	1.23	2.9	0.8494	224.09	1.29	253.96	43.59	119.7	17.56	178.31	1316.28	0.05	100.49	2.75	15.86	4.24	1.49	81.63
2	50	2	135	15	20.4	48	13.4	50	33.8	1.3	5.06	1.62	3.08	0.65	259	1.7	169	29.8	67	28	130	1316.28	0.05	100.49	3.65	13.6	4.32	1.47	81.63
2	50	2	303.21	16	15	61	10	82.51	27.01	1.55	5.23	1.23	2.9	0.8494	224.09	1.29	253.96	43.59	119.7	17.56	178.31	1316.28	0.05	100.49	2.75	15.86	4.24	1.49	81.63
2	50	2	303.21	12	17	61	13	68	24.1	2	5.58	1.23	2.9	0.8494	55.5	1.2	253.96	43.59	119.7	17.56	178.31	1316.28	0.05	100.49	2.75	15.86	4.24	1.49	81.63
1	50	0	303.21	30.1	21.7	61	32.4	52	25.6	1.7	4.75	0.78	3.49	1.13	485	1.01	253.96	43.59	119.7	17.56	178.31	1316.28	0.05	100.49	2.75	15.86	4.24	1.49	81.63
2	50	1	303.21	25.06	26.4	81.06	43	82.51	27.01	1.55	5.5	1.23	2.9	0.8494	224.09	1.29	253.96	43.59	119.7	17.56	178.31	1316.28	0.05	100.49	4.24	14.8	4.57	1.88	81.63
2	50	1	303.21	25.06	26.4	81.06	43	82.51	27.01	1.55	5.5	1.23	2.9	0.8494	224.09	1.29	253.96	43.59	119.7	17.56	178.31	1316.28	0.05	100.49	2.75	15.86	4.24	1.49	81.63
2	50	1	303.21	33	19	65	52	75	25.6	1.7	6.75	1.23	2.9	0.8494	364.7	1.8	253.96	43.59	119.7	17.56	178.31	1316.28	0.05	100.49	2.75	15.86	4.24	1.49	81.63
2	50	1	303.21	16	16	65	17	82.51	27.01	1.55	5.27	1.23	2.9	1.29	224.09	1.29	253.96	43.59	119.7	17.56	178.31	1316.28	0.05	100.49	2.77	15.2	3.93	1.91	81.63
1	50	0	125	36.2	20	68	23.7	71	22.7	2	4.93	0.86	2.23	0.98	215	1.2	253.96	43.59	119.7	17.56	178.31	1316.28	0.05	100.49	2.75	15.86	4.24	1.49	52.55
1	50	2	303.21	31	17	89	19	70	27.3	1.6	4.26	0.99	3.94	1.38	99	1.27	253.96	43.59	119.7	17.56	178.31	1316.28	0.05	100.49	2.75	15.86	4.24	1.49	81.63
2	50	2	303.21	25.06	26.4	81.06	43	82.51	27.01	1.55	5.5	1.23	2.9	0.8494	224.09	1.29	253.96	43.59	119.7	17.56	178.31	1316.28	0.05	100.49	2.75	15.86	4.24	1.49	81.63
2	50	1	303.21	17	21	55	20	53	28.4	1.5	4.73	1.23	2.9	1.06	224.09	1.29	253.96	43.59	119.7	17.56	178.31	1316.28	0.05	100.49	2.75	15.86	4.24	1.49	81.63
2	50	2	303.21	25.06	26.4	81.06	43	82.51	27.01	1.55	5.5	1.23	2.9	0.8494	224.09	1.29	253.96	43.59	119.7	17.56	178.31	1316.28	0.05	100.49	2.75	15.86	4.24	1.49	81.63
2	50	1	303.21	10	17	55	12	82.51	27.01	1.55	4.52	1.23	2.9	0.75	224.09	1.29	253.96	43.59	119.7	17.56	178.31	1316.28	0.05	100.49	2.75	15.86	4.24	1.49	81.63
1	50	0	303.21	18.4	19.7	88	26.6	61	24.2	1.9	4.83	1.12	3.03	1.04	72	1.33	253.96	43.59	119.7	17.56	178.31	1316.28	0.05	100.49	2.75	15.86	4.24	1.49	81.63
2	50	2	50.99	9	17	66	13	55	31.2	1.3	4.37	1.23	2.9	0.8494	593.5	1	253.96	43.59	119.7	17.56	178.31	70.9	0	0	1.55	16.49	4.47	1.77	81.63
2	50	2	303.21	17.1	23.7	50	14.5	48	24.2	1.7	4.79	1.5	2.9	0.65	170	1.43	253.96	43.59	119.7	17.56	178.31	1316.28	0.05	100.49	2.75	15.86	4.24	1.49	81.63
1	50	1	303.21	19	24	98	19	82.51	24.9	1.8	4.81	1.23	2.9	0.54	224.09	1.29	196	31	155	7	142	1316.28	0.05	100.49	1.51	16.3	4.6	1.75	81.63
1	50	1	303.21	34	21	101	41	57	21.3	2.2	4.95	1.37	3.12	0.65	130	1.56	253.96	43.59	119.7	17.56	178.31	1316.28	0.05	100.49	2.75	15.86	4.24	1.49	81.63
1	50	2	303.21	22	26	83	43	82.51	27.01	1.55	5.03	1.23	2.9	0.8494	224.09	1.29	169	35	146	12	125	0	0.01	34.43	2.75	15.86	4.24	1.49	81.63
2	50	1	303.21	12	17	62	16	82.51	30.6	1.5	5.42	1.23	2.9	1.03	224.09	1.29	253.96	43.59	119.7	17.56	178.31	1316.28	0.05	100.49	2.3	18.4	4.79	1.69	81.63
1	50	2	303.21	21	21	82	19	83	27.3	1.6	4.63	1.19	3.29	0.73	678	1.41	253.96	43.59	119.7	17.56	178.31	1316.28	0.05	100.49	2.75	15.86	4.24	1.49	81.63
2	50	0	303.21	25.06	26.4	81.06	43	82.51	27.01	1.55	5.5	1.23	2.9	0.8494	224.09	1.29	253.96	43.59	119.7	17.56	178.31	1316.28	0.05	100.49	2.75	15.86	4.24	1.49	81.63
2	50	1	303.21	14	19	48	17	82.51	27.01	1.55	5.08	1.23	2.9	1.18	224.09	1.29	253.96	43.59	119.7	17.56	178.31	1316.28	0.05	100.49	2.75	15.86	4.24	1.49	81.63
2	50	1	303.21	111	74	52	76	82.51	27.01	1.55	5.45	1.23	2.9	0.8494	224.09	1.29	253.96	43.59	119.7	17.56	178.31	1316.28	0.05	100.49	2.75	15.86	4.24	1.49	81.63
1	50	0	303.21	79	34	65	38	77	28.4	1.7	5.81	1.23	2.9	1.93	74.9	0.87	253.96	43.59	119.7	17.56	178.31	1316.28	0.05	100.49	2.75	15.86	4.24	1.49	81.63
2	50	1	303.21	25.06	26.4	81.06	43	82.51	27.01	1.55	5.5	1.23	2.9	0.8494	224.09	1.29	253.96	43.59	119.7	17.56	178.31	1316.28	0.05	100.49	2.75	15.86	4.24	1.49	81.63
1	50	0	303.21	33.2	28.1	83	45.4	95	23.6	1.9	5.26	1.09	3.35	1.35	119	1.31	253.96	43.59	119.7	17.56	178.31	1316.28	0.05	100.49	2.75	15.86	4.24	1.49	81.63
1	50	0	313	16.1	18.4	67	16.8	42	22.5	1.6	7.51	0.6	1.44	0.41	43	0.66	142	29.4	66	29	119	40.5	0.01	24.04	0.83	19.3	4.11	1.47	2.2
2	50	0	303.21	12	20	67	11	82.51	27.01	1.55	5.45	1.23	2.9	0.71	224.09	1.29	178	37	73	11	138	1316.28	0.05	100.49	2.75	15.86	4.24	1.49	81.63
2	50	0	303.21	23.1	24.2	52	15.1	49	28.6	1.7	4.91	1.23	2.9	0.8494	224.09	1.29	253.96	43.59	119.7	17.56	178.31	1316.28	0.05	100.49	2.75	15.86	4.24	1.49	81.63
2	50	1	303.21	22	18	52	22	82.51	29.1	1.4	5.24	1.23	2.9	0.8494	224.09	1.29	253.96	43.59	119.7	17.56	178.31	1316.28	0.05	100.49	2.75	15.86	4.24	1.49	81.63
2	50	1	303.21	14	20	71	12	82.51	27.01	1.55	4.88	1.23	2.9	0.78	224.09	1.29	145	31	83	17	121	1316.28	0.05	100.49	1.05	15.6	4.72	1.49	81.63
1	50	0	303.21	54	22	59	56	82.51	27.01	1.55	5.41	1.23	2.9	0.8494	224.09	1.29	253.96	43.59	119.7	17.56	178.31	1316.28	0.05	100.49	2.75	15.86	4.24	1.49	81.63
2	50	1	782	11	19	58	17	35	33	1.2	4.97	1.49	1.72	0.29	233	1.39	161	26	43	5	124	24.8	0.01	0	1.23	12.4	2.95	1.02	7.51
1	50	1	303.21	13.3	15.5	70	28	58	25.5	1.7	6.62	0.92	2.99	1.09	437	1.25	253.96	43.59	119.7	17.56	178.31	14.6	0.01	0	2.75	15.86	4.24	1.49	81.63
1	50	0	303.21	10	14	86	21	53	31.4	1.4	5.85	1.23	2.9	0.47	318	1.16	253.96	43.59	119.7	17.56	178.31	0	0	21.05	4.17	17.2	4.36	1.97	9.33
2	50	0	303.21	14	15	77	17	44	31	1.4	5.13	1.23	2.9	0.86	269.3	1.55	253.96	43.59	119.7	17.56	178.31	1316.28	0.05	100.49	2.75	15.86	4.24	1.49	81.63
1	50	0	303.21	61	27	65	42	93	22.1	1.9	4.63	1.23	2.9	0.99	210.2	1.05	253.96	43.59	119.7	17.56	178.31	1316.28	0.05	100.49	2.75	15.86	4.24	1.49	81.63
2	50	0	303.21	29	33	56	14	82.51	27.01	1.55	5.33	1.23	2.9	1.37	224.09	1.29	179	29	78	12	131	1316.28	0.05	100.49	3.62	15.01	3.97	1.31	81.63
2	50	2	303.21	25.06	26.4	81.06	43	82.51	27.01	1.55	5.5	1.23	2.9	0.8494	224.09	1.29	253.96	43.59	119.7	17.56	178.31	1316.28	0.05	100.49	2.75	15.86	4.24	1.49	81.63
2	50	0	303.21	16	19	74	12	82.51	27.01	1.55	4.51	1.23	2.9	0.8494	224.09	1.29	253.96	43.59	119.7	17.56	178.31	1316.28	0.05	100.49	2.75	15.86	4.24	1.49	81.63
2	50	2	303.21	18	19	48	12	82.51	27.01	1.55	5.57	1.23	2.9	0.8494	224.09	1.29	253.96	43.59	119.7	17.56	178.31	1316.28	0.05	100.49	2.75	15.86	4.24	1.49	81.63
2	50	0	303.21	25.06	26.4	81.06	43	82.51	27.01	1.55	5.5	1.23	2.9	0.8494	224.09	1.29	253.96	43.59	119.7	17.56	178.31	1316.28	0.05	100.49	3.81	15.1	4.55	1.53	81.63
2	50	0	303.21	25.06	26.4	81.06	43	82.51	27.01	1.55	5.5	1.23	2.9	0.8494	224.09	1.29	253.96	43.59	119.7	17.56	178.31	1316.28	0.05	100.49	2.75	15.86	4.24	1.49	81.63
2	50	1	303.21	25.06	26.4	81.06	43	82.51	27.01	1.55	5.5	1.23	2.9	0.8494	224.09	1.29	253.96	43.59	119.7	17.56	178.31	1316.28	0.05	100.49	2.75	15.86	4.24	1.49	81.63
2	49	0	303.21	25.06	26.4	81.06	43	82.51	27.01	1.55	5.5	1.23	2.9	0.8494	224.09	1.29	253.96	43.59	119.7	17.56	178.31	1316.28	0.05	100.49	2.75	15.86	4.24	1.49	81.63
2	49	1	303.21	25.06	26.4	81.06	43	82.51	27.01	1.55	5.5	1.23	2.9	0.8494	224.09	1.29	253.96	43.59	119.7	17.56	178.31	1316.28	0.05	100.49	2.75	15.86	4.24	1.49	81.63
1	49	0	303.21	14.7	16.1	84	23.5	49	26.7	1.8	4.71	1.52	3.69	1.24	278	1.54	253.96	43.59	119.7	17.56	178.31	1316.28	0.05	100.49	2.75	15.86	4.24	1.49	81.63
2	49	2	303.21	13	15	52	15	49	24.3	1.8	4.78	1.23	2.9	0.64	52.2	1.68	253.96	43.59	119.7	17.56	178.31	1316.28	0.05	100.49	2.75	15.86	4.24	1.49	81.63
2	49	2	303.21	35	23	55	18	82.51	27.01	1.55	6.82	1.23	2.9	1.04	224.09	1.29	146	18	27	4	114	1316.28	0.05	100.49	2.75	15.86	4.24	1.49	81.63
1	49	1	303.21	25.06	26.4	81.06	43	82.51	27.01	1.55	5.5	1.23	2.9	0.8494	224.09	1.29	253.96	43.59	119.7	17.56	178.31	1316.28	0.05	100.49	2.75	15.86	4.24	1.49	81.63
2	49	0	303.21	9	16	43	13	82.51	27.01	1.55	4.73	1.23	2.9	0.8494	224.09	1.29	253.96	43.59	119.7	17.56	178.31	1316.28	0.05	100.49	2.75	15.86	4.24	1.49	81.63
2	49	0	148	12	17	51	13.9	64	22.9	1.6	5.13	1.27	2.07	0.38	86	1.23	160	23	41	5	113	198.4	0	0	3.19	18.4	3.68	1.28	2.12
2	49	3	303.21	14	20	65	14	46	30	1.4	5.93	1.26	2.85	0.67	224.09	1.29	194	35	68	13	170	1316.28	0.05	100.49	2.99	16.1	5.19	2.01	81.63
2	49	1	303.21	12	16	42	16	41	31.6	1.2	4.43	1.23	2.9	0.8494	348.5	0.9	253.96	43.59	119.7	17.56	178.31	1316.28	0.05	100.49	2.75	15.86	4.24	1.49	81.63
2	49	2	102	12	19	52	21	64	22	2.2	5.11	1.33	2.19	0.49	214.2	1.52	165	32	51	8	144	1316.28	0.05	100.49	2.32	15.08	4.53	1.26	81.63
2	49	1	303.21	25.06	26.4	81.06	43	82.51	27.01	1.55	5.5	1.23	2.9	0.8494	224.09	1.29	253.96	43.59	119.7	17.56	178.31	1316.28	0.05	100.49	2.75	15.86	4.24	1.49	81.63
2	49	2	303.21	12	16	56	15	82.51	27.01	1.55	6.04	1.23	2.9	1.13	224.09	1.29	253.96	43.59	119.7	17.56	178.31	1316.28	0.05	100.49	2.75	15.86	4.24	1.49	81.63
2	49	2	303.21	27	23	44	59	87	25.3	1.5	4.49	1.23	2.9	0.47	224.09	1.29	196	27	57	10	143	224.4	0	0	2.75	15.86	4.24	1.49	81.63
2	49	1	303.21	58	45	47	27	63	34.5	1.2	5.97	1.23	2.9	0.75	189.9	1.43	253.96	43.59	119.7	17.56	178.31	1316.28	0.05	100.49	0.85	12	4.38	1.77	81.63
2	49	2	303.21	11	15	52	11	40	29	1.4	4.61	1.23	2.9	0.8494	224.09	1.29	253.96	43.59	119.7	17.56	178.31	1316.28	0.05	100.49	2.75	15.86	4.24	1.49	81.63
2	49	2	303.21	25.06	26.4	81.06	43	82.51	27.01	1.55	5.5	1.23	2.9	0.8494	224.09	1.29	253.96	43.59	119.7	17.56	178.31	1316.28	0.05	100.49	2.75	15.86	4.24	1.49	81.63
2	49	0	303.21	8	13	62	14	40	28	1.6	4.83	1.23	2.9	0.8494	224.09	1.29	253.96	43.59	119.7	17.56	178.31	1316.28	0.05	100.49	2.75	15.86	4.24	1.49	81.63
1	49	2	303.21	25.06	26.4	81.06	43	82.51	27.01	1.55	5.5	1.23	2.9	0.8494	224.09	1.29	253.96	43.59	119.7	17.56	178.31	1316.28	0.05	100.49	2.75	15.86	4.24	1.49	81.63
2	49	2	303.21	25.06	26.4	81.06	43	82.51	27.01	1.55	5.5	1.23	2.9	0.8494	224.09	1.29	253.96	43.59	119.7	17.56	178.31	1316.28	0.05	100.49	2.75	15.86	4.24	1.49	81.63
1	49	1	303.21	32	23	89	33	82.51	27.01	1.55	5.92	1.23	2.9	0.8494	224.09	1.29	253.96	43.59	119.7	17.56	178.31	1316.28	0.05	100.49	2.75	15.86	4.24	1.49	81.63
2	49	1	280	62	46	45	48	59	29.2	1.6	6.42	1.03	3.41	1.24	47.7	1.1	191	39	62	19	173	1316.28	0.05	100.49	2.75	15.86	4.24	1.49	81.63
2	49	3	303.21	11.6	10.7	60	30	68	34.6	1	5.11	0.86	2.56	0.87	114	1.05	118	19.2	13	6	84	64.8	0	0	0.94	16.2	4.21	1.69	16.96
2	49	0	303.21	17.9	21.6	56	28	70	36	1.1	5.32	1.36	3.9	1.68	86	1.65	253.96	43.59	119.7	17.56	178.31	1316.28	0.05	100.49	2.75	15.86	4.24	1.49	81.63
2	49	2	303.21	11	15	71	11	33	18.7	1.9	5.71	1.23	2.9	0.8494	224.09	1.29	253.96	43.59	119.7	17.56	178.31	1316.28	0.05	100.49	2.75	15.86	4.24	1.49	81.63
2	49	3	303.21	9	14	63	18	82.51	27.01	1.55	5.05	1.23	2.9	0.8494	224.09	1.29	253.96	43.59	119.7	17.56	178.31	1316.28	0.05	100.49	2.75	15.86	4.24	1.49	81.63
2	49	3	138	18	23	53	19	53	27.1	1.8	5.44	1.37	3.46	0.73	393	1.54	208	37	103	12	165	77.8	0	0	1.22	16.9	5.01	1.67	1.54
1	49	1	303.21	16.4	17.6	74	19.1	44	25.7	1.6	5.01	1.03	3.26	0.76	406	1.24	253.96	43.59	119.7	17.56	178.31	1316.28	0.05	100.49	2.75	15.86	4.24	1.49	81.63
2	49	3	303.21	11.2	19	45	10.4	40	25.3	1.6	4.65	1.51	3.91	1.03	150	1.62	253.96	43.59	119.7	17.56	178.31	1316.28	0.05	100.49	2.75	15.86	4.24	1.49	81.63
1	49	1	303.21	23	21	69	25	66	21.4	1.9	5.18	1.23	2.9	0.8494	71.9	1	253.96	43.59	119.7	17.56	178.31	1316.28	0.05	100.49	2.75	15.86	4.24	1.49	81.63
2	49	2	303.21	14	18	72	22	72	30.6	1.4	4.79	1.23	2.9	0.73	168.7	1.24	253.96	43.59	119.7	17.56	178.31	1316.28	0.05	100.49	2.75	15.86	4.24	1.49	81.63
1	49	0	342	51	25	65	260	112	23.2	1.9	7.21	0.85	4.22	0.86	134	1	186	35	46	11.5	161	43.5	0	0	0.56	21.6	5.16	1.9	42.64
1	49	1	303.21	35	23	69	43	82.51	27.01	1.55	9.02	1.23	2.9	0.8494	224.09	1.29	136	22	126	7	94	360.5	0.01	32.55	2.75	15.86	4.24	1.49	3.37
2	49	1	303.21	15	20	64	25	82.51	27.01	1.55	5.33	1.23	2.9	0.86	224.09	1.29	253.96	43.59	119.7	17.56	178.31	1316.28	0.05	100.49	2.75	15.86	4.24	1.49	81.63
2	49	0	303.21	15	19	67	19	82.51	27.01	1.55	5.55	1.23	2.9	1.09	224.09	1.29	253.96	43.59	119.7	17.56	178.31	1316.28	0.05	100.49	2.75	15.86	4.24	1.49	81.63
2	49	2	303.21	11.2	18.9	54	11.2	82.51	27.01	1.55	5.11	1.41	3.09	0.61	224.09	1.29	253.96	43.59	119.7	17.56	178.31	1316.28	0.05	100.49	2.75	15.86	4.24	1.49	81.63
2	49	0	303.21	11	19.1	50	11	75	22.3	1.8	5.41	0.83	2.13	0.51	15	0.9	253.96	43.59	119.7	17.56	178.31	1316.28	0.05	100.49	2.75	15.86	4.24	1.49	81.63
2	49	2	303.21	12	17	47	10	59	30.6	1.4	5.6	1.23	2.9	0.71	46	1.75	253.96	43.59	119.7	17.56	178.31	1316.28	0.05	100.49	2.75	15.86	4.24	1.49	81.63
2	49	2	303.21	10	15	60	12.8	46	24.2	1.7	5.42	0.97	2.51	0.71	117	1.21	253.96	43.59	119.7	17.56	178.31	1316.28	0.05	100.49	2.75	15.86	4.24	1.49	81.63
2	49	0	303.21	10	15	68	13	82.51	27.01	1.55	5.05	1.23	2.9	0.84	224.09	1.29	253.96	43.59	119.7	17.56	178.31	1316.28	0.05	100.49	2.75	15.86	4.24	1.49	81.63
2	49	1	6.18	7	12	55	8	45	23.3	1.7	4.25	0.99	3.47	0.61	459	1.25	130	22	22	7	115	12.1	0	0	0.67	18	2.98	1.14	81.63
2	49	1	303.21	11.7	17.7	48	20.3	46	24.9	1.6	4.69	1.67	1.79	0.42	164	1.74	253.96	43.59	119.7	17.56	178.31	1316.28	0.05	100.49	2.75	15.86	4.24	1.49	81.63
2	49	2	646	4	9	27	43	75	29.9	0.8	4.23	1.39	2.48	0.44	23	1.37	172	31	7	4	140	131.4	0.02	0	5.1	12.2	2.72	0.86	36.88
2	49	1	303.21	18	20	59	23	70	33.1	1.3	5.06	1	3.24	0.57	77	1.15	253.96	43.59	119.7	17.56	178.31	1316.28	0.05	100.49	2.75	15.86	4.24	1.49	81.63
2	49	1	303.21	16	17	57	16	82.51	27.01	1.55	5.02	1.23	2.9	1.06	224.09	1.29	253.96	43.59	119.7	17.56	178.31	1316.28	0.05	100.49	2.75	15.86	4.24	1.49	81.63
2	49	2	108	5	20	54	21	53	29.3	1.5	5.08	1.88	3.29	0.43	528	1.92	173	35	49	7	149	26.2	0	0	2.22	14.5	4.18	1.9	81.63
2	49	1	303.21	11	18	54	10	82.51	27.01	1.55	4.74	1.23	2.9	0.52	224.09	1.29	253.96	43.59	119.7	17.56	178.31	1316.28	0.05	100.49	2.75	15.86	4.24	1.49	81.63
2	49	3	303.21	25.06	26.4	81.06	43	82.51	27.01	1.55	5.5	1.23	2.9	0.8494	224.09	1.29	253.96	43.59	119.7	17.56	178.31	1316.28	0.05	100.49	2.75	15.86	4.24	1.49	81.63
2	49	1	303.21	21	15	58	10	49	17.5	2	4.17	1.23	2.9	0.82	9.7	1.04	253.96	43.59	119.7	17.56	178.31	1316.28	0.05	100.49	2.75	15.86	4.24	1.49	81.63
1	49	0	278	23.8	26.5	83	26.2	81	27.9	1.7	5.14	1.12	3.96	1.53	244	1.63	160	32.1	160	9	119	21.9	0.01	50.36	1.41	15.8	5.43	1.93	81.63
2	49	2	303.21	16	17	45	31	82.51	27.01	1.55	5.65	1.58	2.71	0.88	224.09	1.29	253.96	43.59	119.7	17.56	178.31	1316.28	0.05	100.49	2.75	15.86	4.24	1.49	81.63
2	49	2	303.21	20	24	52	20	82.51	27.01	1.55	5.24	1.23	2.9	0.9	224.09	1.29	253.96	43.59	119.7	17.56	178.31	1316.28	0.05	100.49	2.75	15.86	4.24	1.49	81.63
2	49	2	303.21	25.06	26.4	81.06	43	82.51	27.01	1.55	5.5	1.23	2.9	0.8494	224.09	1.29	253.96	43.59	119.7	17.56	178.31	1316.28	0.05	100.49	2.75	15.86	4.24	1.49	81.63
2	49	1	303.21	15	19	56	38	50	35.7	1.3	4.41	1.3	4.07	1.63	17.7	1.5	118	23	51	7	102	1316.28	0.05	100.49	2.75	15.86	4.24	1.49	81.63
1	49	1	303.21	25	17	73	24	82.51	27.01	1.55	4.71	1.23	2.9	0.8494	224.09	1.29	253.96	43.59	119.7	17.56	178.31	1316.28	0.05	100.49	2.75	15.86	4.24	1.49	81.63
2	49	3	303.21	25.06	26.4	81.06	43	82.51	27.01	1.55	5.5	1.23	2.9	0.8494	224.09	1.29	253.96	43.59	119.7	17.56	178.31	1316.28	0.05	100.49	2.75	15.86	4.24	1.49	81.63
1	49	3	303.21	34	20	74	72	42	24.1	1.7	5.25	0.92	3.92	1.83	324	1.22	159	23	79	12	116	52	0.01	0	2.75	15.86	4.24	1.49	81.63
2	49	1	303.21	12	17	68	43	82.51	27.01	1.55	5.5	1.23	2.9	0.8494	224.09	1.29	177	33	77	7	135	1316.28	0.05	100.49	2.75	15.86	4.24	1.49	81.63
1	49	3	303.21	82	37	84	237	70	29.2	1.6	6.26	1.23	2.9	1.14	40	1.58	185	33	113	11	142	0	0.01	23.33	2.75	15.86	4.24	1.49	81.63
2	49	2	303.21	14	19	48	11	82.51	27.01	1.55	4.83	1.23	2.9	0.8494	224.09	1.29	253.96	43.59	119.7	17.56	178.31	1316.28	0.05	100.49	2.75	15.86	4.24	1.49	81.63
2	49	1	303.21	13	25	50	18	82.51	27.01	1.55	5.57	1.23	2.9	0.8494	224.09	1.29	253.96	43.59	119.7	17.56	178.31	1316.28	0.05	100.49	2.75	15.86	4.24	1.49	81.63
2	49	3	303.21	19	23	54	21	82.51	27.01	1.55	5.29	1.11	2.87	0.81	224.09	1.29	253.96	43.59	119.7	17.56	178.31	1316.28	0.05	100.49	2.75	15.86	4.24	1.49	81.63
1	49	0	303.21	32	28	94	58.9	44	29.1	1.5	5.73	1.05	3.64	1.63	33	1.27	253.96	43.59	119.7	17.56	178.31	1316.28	0.05	100.49	2.75	15.86	4.24	1.49	81.63
1	49	2	303.21	10.2	15.8	89	12.5	59	21	2	4.31	1.21	2.13	0.76	63	1.35	253.96	43.59	119.7	17.56	178.31	1316.28	0.05	100.49	2.75	15.86	4.24	1.49	81.63
1	49	1	293	15	24	75	11.4	52	31.3	1.3	4.18	1.61	1.86	0.36	55	1.51	152	27.4	75	11	113	32	0.01	35.04	2.62	13.3	3.6	0.89	1.95
2	49	0	303.21	14	12	54	14	82.51	27.01	1.55	5.22	1.23	2.9	0.7	224.09	1.29	253.96	43.59	119.7	17.56	178.31	1316.28	0.05	100.49	2.75	15.86	4.24	1.49	81.63
2	49	1	303.21	25.06	26.4	81.06	43	82.51	27.01	1.55	5.5	1.23	2.9	0.8494	224.09	1.29	253.96	43.59	119.7	17.56	178.31	1316.28	0.05	100.49	2.75	15.86	4.24	1.49	81.63
2	49	2	303.21	8	12	40	9	44	23.4	1.9	5.28	1.23	2.9	0.8494	27.4	1.4	253.96	43.59	119.7	17.56	178.31	1316.28	0.05	100.49	2.75	15.86	4.24	1.49	81.63
1	49	1	303.21	23	28	76	21	82.51	27.01	1.55	5.06	1.23	2.9	0.8494	224.09	1.29	253.96	43.59	119.7	17.56	178.31	1316.28	0.05	100.49	2.75	15.86	4.24	1.49	81.63
1	49	0	303.21	18	21	72	17.5	82.51	28.7	1.5	5.01	1.2	2.51	0.73	99	1.29	163	31.3	68	5	122	1316.28	0.05	100.49	2.32	20	5.37	1.49	81.63
2	49	2	303.21	12	18	79	10	51	31.9	1.4	5.33	1.23	2.9	0.44	62.8	1.67	253.96	43.59	119.7	17.56	178.31	1316.28	0.05	100.49	2.75	15.86	4.24	1.49	81.63
2	49	2	303.21	25.06	26.4	81.06	43	82.51	27.01	1.55	5.5	1.23	2.9	0.8494	224.09	1.29	253.96	43.59	119.7	17.56	178.31	1316.28	0.05	100.49	2.75	15.86	4.24	1.49	81.63
2	49	0	79	14	21	53	13	45	27.2	1.7	5.37	1.23	2.9	0.77	133	1.52	139	25	64	9	126	1316.28	0.05	100.49	2.75	15.86	4.24	1.49	81.63
2	49	1	303.21	34	30	52	33	82.51	27.01	1.55	5.1	1.23	2.9	0.8494	224.09	1.29	253.96	43.59	119.7	17.56	178.31	1316.28	0.05	100.49	2.75	15.86	4.24	1.49	81.63
2	49	1	303.21	13	21	61	25	82.51	29.1	1.6	4.81	1.23	2.9	0.8494	224.09	1.29	253.96	43.59	119.7	17.56	178.31	1316.28	0.05	100.49	2.75	15.86	4.24	1.49	81.63
2	49	1	303.21	14	22	65	12.4	82.51	27.01	1.55	4.92	1.38	4.37	1.28	224.09	1.29	253.96	43.59	119.7	17.56	178.31	1316.28	0.05	100.49	2.75	15.86	4.24	1.49	81.63
2	49	1	303.21	25.06	26.4	81.06	43	82.51	27.01	1.55	5.5	1.23	2.9	0.8494	224.09	1.29	253.96	43.59	119.7	17.56	178.31	1316.28	0.05	100.49	2.75	15.86	4.24	1.49	81.63
2	49	2	303.21	19	15	64	15	82.51	27.01	1.55	4.61	1.23	2.9	0.8494	224.09	1.29	253.96	43.59	119.7	17.56	178.31	1316.28	0.05	100.49	2.75	15.86	4.24	1.49	81.63
1	49	1	303.21	20	42	92	12	79	24	2	5.63	1.23	2.9	0.8494	224.09	1.29	253.96	43.59	119.7	17.56	178.31	1316.28	0.05	100.49	2.75	15.86	4.24	1.49	81.63
2	49	2	303.21	25.06	26.4	81.06	43	82.51	27.01	1.55	5.5	1.23	2.9	0.8494	224.09	1.29	253.96	43.59	119.7	17.56	178.31	1316.28	0.05	100.49	5.46	14.18	4.42	1.73	81.63
2	49	0	303.21	25.06	26.4	81.06	43	82.51	27.01	1.55	5.5	1.23	2.9	0.8494	224.09	1.29	253.96	43.59	119.7	17.56	178.31	1316.28	0.05	100.49	2.75	15.86	4.24	1.49	81.63
2	49	2	303.21	6	18	67	9	82.51	27.01	1.55	4.73	1.23	2.9	1	224.09	1.29	253.96	43.59	119.7	17.56	178.31	1316.28	0.05	100.49	2.75	15.86	4.24	1.49	81.63
2	49	0	119.7	30	26	62	53	69	24.9	1.8	4.97	1.23	2.9	0.68	37.9	1.5	167	31	41	8	122	20.2	0	0	2.75	15.86	4.24	1.49	81.63
1	49	0	303.21	11	11	70	15	82.51	27.01	1.55	5.23	1.23	2.9	0.8494	224.09	1.29	253.96	43.59	119.7	17.56	178.31	1316.28	0.05	100.49	1.72	18.1	5.14	1.49	81.63
1	49	0	303.21	20	17	80	18	82.51	27.01	1.55	5.66	1.23	2.9	0.8494	224.09	1.29	253.96	43.59	119.7	17.56	178.31	1316.28	0.05	100.49	2.75	15.86	4.24	1.49	81.63
2	49	0	303.21	25.06	26.4	81.06	43	82.51	27.01	1.55	5.5	1.23	2.9	0.8494	224.09	1.29	253.96	43.59	119.7	17.56	178.31	1316.28	0.05	100.49	2.75	15.86	4.24	1.49	81.63
1	49	2	303.21	13	16	56	13	76	22.8	1.9	5.14	0.82	2.68	0.85	218	1.05	253.96	43.59	119.7	17.56	178.31	1316.28	0.05	100.49	2.75	15.86	4.24	1.49	81.63
2	49	2	303.21	25.06	26.4	81.06	43	82.51	27.01	1.55	5.5	1.23	2.9	0.8494	224.09	1.29	253.96	43.59	119.7	17.56	178.31	1316.28	0.05	100.49	2.75	15.86	4.24	1.49	81.63
2	49	1	303.21	8	15	55	15	82.51	27.01	1.55	5.73	1.23	2.9	0.78	224.09	1.29	253.96	43.59	119.7	17.56	178.31	1316.28	0.05	100.49	2.75	15.86	4.24	1.49	81.63
2	49	3	303.21	25.06	26.4	81.06	43	82.51	27.01	1.55	5.5	1.23	2.9	0.8494	224.09	1.29	253.96	43.59	119.7	17.56	178.31	1316.28	0.05	100.49	2.75	15.86	4.24	1.49	81.63
1	49	2	303.21	23.6	26.6	91	114.4	74	21.5	2	4.36	1.06	3.44	1.52	141	1.31	253.96	43.59	119.7	17.56	178.31	1316.28	0.05	100.49	2.75	15.86	4.24	1.49	81.63
2	49	3	303.21	93	52	39	258	101	29.9	1.2	5.05	0.85	2.52	0.75	558	1.12	253.96	43.59	119.7	17.56	178.31	1316.28	0.05	100.49	2.75	15.86	4.24	1.49	81.63
2	48	1	303.21	13	22	59	19	49	36.7	1.3	5.35	1.6	4.3	0.79	617	1.7	253.96	43.59	119.7	17.56	178.31	1316.28	0.05	100.49	2.75	15.86	4.24	1.49	81.63
2	48	0	303.21	12	14	68	10	82.51	27.01	1.55	5.36	1.23	2.9	0.8494	224.09	1.29	253.96	43.59	119.7	17.56	178.31	1316.28	0.05	100.49	2.75	15.86	4.24	1.49	81.63
2	48	0	303.21	55	46	61	191	130	30.8	1.4	5.95	1.23	2.9	1.26	27.9	1.42	253.96	43.59	119.7	17.56	178.31	1316.28	0.05	100.49	2.75	15.86	4.24	1.49	81.63
1	48	0	303.21	11	19	67	50	111	24.7	1.9	4.45	1.23	2.9	0.79	84	1.64	253.96	43.59	119.7	17.56	178.31	1316.28	0.05	100.49	2.75	15.86	4.24	1.49	81.63
2	48	0	303.21	7	9	46	16	82.51	27.01	1.55	4.96	1.23	2.9	0.8494	224.09	1.29	253.96	43.59	119.7	17.56	178.31	1316.28	0.05	100.49	2.75	15.86	4.24	1.49	81.63
2	48	3	21.47	13	15	62	14	55	30	1.5	5.54	1.23	2.9	1.03	177.5	1.44	164	27	66	9	129	1316.28	0.05	100.49	1.14	15.99	5.56	1.87	81.63
2	48	2	303.21	26	24	71	29	82.51	27.01	1.55	5.3	1.23	2.9	0.74	224.09	1.29	253.96	43.59	119.7	17.56	178.31	1316.28	0.05	100.49	1.76	17.1	4.56	1.64	81.63
1	48	1	303.21	25.06	26.4	81.06	43	82.51	27.01	1.55	5.5	1.23	2.9	0.8494	224.09	1.29	253.96	43.59	119.7	17.56	178.31	1316.28	0.05	100.49	2.75	15.86	4.24	1.49	81.63
1	48	2	303.21	21	17	79	14	82.51	27.01	1.55	5.9	1.23	2.9	0.8494	224.09	1.29	253.96	43.59	119.7	17.56	178.31	1316.28	0.05	100.49	2.75	15.86	4.24	1.49	81.63
2	48	2	77.64	15	13	59	27	57	22.8	1.5	6.06	1.23	2.9	1.34	244	0.89	153	37	76	14	150	14.2	0.03	23.19	6.08	19.74	4.89	1.83	12.05
2	48	2	303.21	11	16	55	16.3	65	30.3	1.3	4.89	1.24	1.92	0.7	80	1.45	253.96	43.59	119.7	17.56	178.31	1316.28	0.05	100.49	1.46	12.8	3.97	1.37	81.63
2	48	1	303.21	25.06	26.4	81.06	43	82.51	27.01	1.55	5.5	1.23	2.9	0.8494	224.09	1.29	253.96	43.59	119.7	17.56	178.31	1316.28	0.05	100.49	2.75	15.86	4.24	1.49	81.63
2	48	2	303.21	15	18	53	15	82.51	27.01	1.55	4.98	1.23	2.9	0.42	224.09	1.29	253.96	43.59	119.7	17.56	178.31	1316.28	0.05	100.49	2.75	15.86	4.24	1.49	81.63
2	48	1	303.21	17	18	57	9	36	25.7	1.7	4.46	1.53	2.66	0.38	234	1.59	253.96	43.59	119.7	17.56	178.31	1316.28	0.05	100.49	2.75	15.86	4.24	1.49	81.63
2	48	1	5.11	8	19	44	10	42	33.4	1.3	5.21	1.84	2.49	0.53	70	1.85	202	39	145	10	176	1316.28	0.05	100.49	3.78	16.64	4.15	1.82	81.63
2	48	0	303.21	25.06	26.4	81.06	43	82.51	27.01	1.55	5.5	1.23	2.9	0.8494	224.09	1.29	253.96	43.59	119.7	17.56	178.31	1316.28	0.05	100.49	2.75	15.86	4.24	1.49	81.63
2	48	1	303.21	8	15	49	30	96	29.7	1.2	5.02	1.15	2.21	0.39	242	1.38	253.96	43.59	119.7	17.56	178.31	1316.28	0.05	100.49	2.75	15.86	4.24	1.49	81.63
2	48	2	48.7	32.8	19.9	58	13.1	48	23.2	2.1	5.71	1.52	4.17	1.4	79	1.32	135	20.5	63	3.8	107	27	0	0	8.73	12	4.3	1.79	81.63
2	48	1	303.21	29	30	53	22	82.51	27.01	1.55	4.91	1.23	2.9	0.8494	224.09	1.29	183	33	70	10	118	1316.28	0.05	100.49	2.75	15.86	4.24	1.49	81.63
2	48	1	303.21	23	25	57	14	50	29.5	1.5	4.54	1.23	2.9	0.94	113.6	1.2	253.96	43.59	119.7	17.56	178.31	1316.28	0.05	100.49	2.75	15.86	4.24	1.49	81.63
1	48	0	303.21	37	25	71	22	82.51	33.6	1.4	5.65	1.23	2.9	0.8494	224.09	1.29	253.96	43.59	119.7	17.56	178.31	1316.28	0.05	100.49	2.75	15.86	4.24	1.49	81.63
2	48	2	3.34	10.9	17.3	60	43	82.51	27.01	1.55	5.5	1.23	2.9	0.8494	224.09	1.29	153	29.4	109	12	136	1316.28	0.05	100.49	2.75	15.86	4.24	1.49	81.63
2	48	1	261	92	56	43	82	90	38.3	1.2	6.2	1.49	3.74	1.48	162	1.54	197	26	102	11	129	1316.28	0.05	100.49	4.13	15.2	5.01	1.34	81.63
1	48	3	303.21	24.8	24.2	84	27.1	82.51	27.01	1.55	5.57	1.18	2.71	0.84	224.09	1.29	253.96	43.59	119.7	17.56	178.31	1316.28	0.05	100.49	2.75	15.86	4.24	1.49	81.63
1	48	1	303.21	24	24	93	43	82.51	27.01	1.55	5.56	1.23	2.9	0.8494	224.09	1.29	257	44	121	16	190	1316.28	0.05	100.49	2.75	15.86	4.24	1.49	81.63
2	48	3	303.21	18.5	24.3	55	9.5	42	27.3	1.6	4.42	1.23	2.9	0.8494	224.09	1.29	253.96	43.59	119.7	17.56	178.31	1316.28	0.05	100.49	1.46	15.3	4.11	1.06	81.63
2	48	1	303.21	8	15	64	21	82.51	27.01	1.55	5.45	1.23	2.9	1.45	224.09	1.29	253.96	43.59	119.7	17.56	178.31	1316.28	0.05	100.49	2.75	15.86	4.24	1.49	81.63
2	48	3	303.21	11	11	54	17	52	22.9	1.7	4.89	1.23	2.9	0.8494	104.1	1	253.96	43.59	119.7	17.56	178.31	1316.28	0.05	100.49	2.75	15.86	4.24	1.49	81.63
2	48	0	303.21	14.8	25	41	12	82.51	27.01	1.55	5.03	1.32	2.42	0.96	224.09	1.29	168	23.8	68	21	120	1316.28	0.05	100.49	0.9	17.9	4.92	1.64	81.63
2	48	2	303.21	8	17	56	14	82.51	27.01	1.55	5.02	1.23	2.9	0.8494	224.09	1.29	253.96	43.59	119.7	17.56	178.31	1316.28	0.05	100.49	1.95	15.2	4.99	1.63	81.63
2	48	1	303.21	25.06	26.4	81.06	43	82.51	27.01	1.55	5.5	1.23	2.9	0.8494	224.09	1.29	253.96	43.59	119.7	17.56	178.31	1316.28	0.05	100.49	2.75	15.86	4.24	1.49	81.63
2	48	0	303.21	25	25	52	15	66	29.2	1.5	5.34	1.23	2.9	0.8494	44	1.4	253.96	43.59	119.7	17.56	178.31	1316.28	0.05	100.49	2.75	15.86	4.24	1.49	81.63
2	48	0	303.21	16	16	53	15	82.51	27.01	1.55	4.75	1.23	2.9	0.8494	224.09	1.29	253.96	43.59	119.7	17.56	178.31	1316.28	0.05	100.49	2.75	15.86	4.24	1.49	81.63
2	48	1	303.21	25	20	52	23	82.51	27.01	1.55	5.73	1.24	4.13	0.76	224.09	1.29	253.96	43.59	119.7	17.56	178.31	1316.28	0.05	100.49	2.75	15.86	4.24	1.49	81.63
1	48	3	303.21	24	18	63	24	82.51	27.01	1.55	5.56	1.23	2.9	0.8494	224.09	1.29	158	25	187	11	139	1316.28	0.05	100.49	2.75	15.86	4.24	1.49	81.63
2	48	3	33.25	11	16	60	14	45	21.5	1.9	4.27	1.23	2.9	0.79	68.3	0.88	125	24	44	6	97	0	0	0	1.68	13.45	4.14	1.4	81.63
2	48	0	303.21	10	16	55	10	55	25.2	1.7	5.28	1.23	2.9	0.71	11	1.94	253.96	43.59	119.7	17.56	178.31	1316.28	0.05	100.49	2.75	15.86	4.24	1.49	81.63
2	48	2	303.21	10	13	55	20	66	21.4	1.7	6.12	1.29	3.22	0.72	38	1.52	253.96	43.59	119.7	17.56	178.31	1316.28	0.05	100.49	2.75	15.86	4.24	1.49	81.63
1	48	0	303.21	36	24	70	22	59	25.6	1.7	4.56	0.84	3.91	1.51	33	1.12	194	25	58	7	130	39.1	0.02	31.2	2.75	15.86	4.24	1.49	3.18
2	48	2	303.21	14.9	19	58	12.2	82.51	27.01	1.55	5.06	1.51	3.35	0.8	224.09	1.29	132	30.2	53	8	110	1316.28	0.05	100.49	1.62	16.5	4.88	1.65	81.63
2	48	0	303.21	10	14	56	8.5	52	29.4	1.5	4.96	1.27	1.99	0.54	153	1.49	253.96	43.59	119.7	17.56	178.31	1316.28	0.05	100.49	2.75	15.86	4.24	1.49	81.63
2	48	3	303.21	25.06	26.4	81.06	43	82.51	27.01	1.55	5.5	1.23	2.9	0.8494	224.09	1.29	253.96	43.59	119.7	17.56	178.31	1316.28	0.05	100.49	2.75	15.86	4.24	1.49	81.63
2	48	3	303.21	25.06	26.4	81.06	43	82.51	27.01	1.55	5.5	1.23	2.9	0.8494	224.09	1.29	253.96	43.59	119.7	17.56	178.31	1316.28	0.05	100.49	2.75	15.86	4.24	1.49	81.63
2	48	1	303.21	8	18.4	66	9.6	82.51	27.01	1.55	4.53	1.23	2.9	0.8494	224.09	1.29	253.96	43.59	119.7	17.56	178.31	1316.28	0.05	100.49	2.75	15.86	4.24	1.49	81.63
2	48	0	303.21	11.7	20.2	63	12.9	82.51	34.1	1.3	5.71	1.23	2.9	0.8494	224.09	1.29	253.96	43.59	119.7	17.56	178.31	1316.28	0.05	100.49	2.75	15.86	4.24	1.49	81.63
2	48	2	303.21	25.06	26.4	81.06	43	82.51	27.01	1.55	5.5	1.23	2.9	0.8494	224.09	1.29	253.96	43.59	119.7	17.56	178.31	1316.28	0.05	100.49	2.75	15.86	4.24	1.49	81.63
2	48	2	303.21	7	9	41	9	82.51	27.01	1.55	4.83	1.23	2.9	0.77	224.09	1.29	253.96	43.59	119.7	17.56	178.31	1316.28	0.05	100.49	2.75	15.86	4.24	1.49	81.63
1	48	0	303.21	87	60	77	75	65	26.8	1.7	5.58	1.02	3.02	1.08	229	1.37	253.96	43.59	119.7	17.56	178.31	1316.28	0.05	100.49	2.75	15.86	4.24	1.49	81.63
2	48	0	303.21	10	12	68	9	82.51	27.01	1.55	5.1	1.23	2.9	0.71	224.09	1.29	253.96	43.59	119.7	17.56	178.31	1316.28	0.05	100.49	2.75	15.86	4.24	1.49	81.63
2	48	2	303.21	13	17	40	10	49	32.4	1.4	5.02	1.42	2.16	0.6	496.4	1.56	253.96	43.59	119.7	17.56	178.31	1316.28	0.05	100.49	2.75	15.86	4.24	1.49	81.63
2	48	0	303.21	34	19	81	29	82.51	27.01	1.55	5.54	1.23	2.9	1.42	224.09	1.29	253.96	43.59	119.7	17.56	178.31	1316.28	0.05	100.49	2.75	15.86	4.24	1.49	81.63
2	48	2	303.21	25.06	26.4	81.06	43	82.51	27.01	1.55	5.5	0.95	2.42	0.95	224.09	1.29	253.96	43.59	119.7	17.56	178.31	1316.28	0.05	100.49	2.75	15.86	4.24	1.49	81.63
2	48	2	303.21	25.06	26.4	81.06	43	82.51	27.01	1.55	5.5	1.23	2.9	0.8494	224.09	1.29	253.96	43.59	119.7	17.56	178.31	1316.28	0.05	100.49	2.75	15.86	4.24	1.49	81.63
2	48	0	303.21	12.7	20.7	49	43	82.51	27.01	1.55	5.6	1.23	2.9	0.8494	224.09	1.29	137	30.5	61	8	116	1316.28	0.05	100.49	2.75	15.86	4.24	1.49	26.91
2	48	2	303.21	13	20	60	11	82.51	29.8	1.5	5.73	1.52	2.23	0.36	224.09	1.29	156	30	70	9	126	1316.28	0.05	100.49	5.49	12.9	4.69	1.78	81.63
2	48	1	303.21	15	20	47	12.4	82.51	27.01	1.55	4.8	1.27	2.06	0.7	224.09	1.29	253.96	43.59	119.7	17.56	178.31	1316.28	0.05	100.49	2.75	15.86	4.24	1.49	81.63
2	48	0	303.21	10	14	61	13	82.51	27.01	1.55	4.98	1.23	2.9	1.41	224.09	1.29	253.96	43.59	119.7	17.56	178.31	1316.28	0.05	100.49	2.75	15.86	4.24	1.49	81.63
2	48	2	303.21	25.06	26.4	81.06	43	82.51	27.01	1.55	5.5	1.23	2.9	0.8494	224.09	1.29	253.96	43.59	119.7	17.56	178.31	1316.28	0.05	100.49	2.75	15.86	4.24	1.49	81.63
2	48	0	6.63	8	14	54	14	82.51	27.01	1.55	5.14	1.23	2.9	0.64	224.09	1.29	253.96	43.59	119.7	17.56	178.31	1316.28	0.05	100.49	2.75	15.86	4.24	1.49	81.63
2	48	1	11.21	17	20	49	21	59	28.1	1.6	5.39	1.13	1.55	0.35	19	1.34	161	25	96	12	131	1316.28	0.05	100.49	2.53	13.42	5.41	1.68	81.63
1	48	2	303.21	54	24	83	35	82.51	27.01	1.55	4.82	1.23	2.9	0.8494	224.09	1.29	253.96	43.59	119.7	17.56	178.31	1316.28	0.05	100.49	2.75	15.86	4.24	1.49	81.63
1	48	2	303.21	11	18	74	20	65	27.4	1.7	4.87	1.43	3.15	0.92	174	1.55	253.96	43.59	119.7	17.56	178.31	1316.28	0.05	100.49	2.75	15.86	4.24	1.49	81.63
2	48	2	303.21	25.06	26.4	81.06	43	82.51	27.01	1.55	5.5	1.23	2.9	0.8494	224.09	1.29	253.96	43.59	119.7	17.56	178.31	1316.28	0.05	100.49	2.75	15.86	4.24	1.49	81.63
2	48	0	303.21	41	35	60	18	31	22.6	1.5	5.17	1.23	2.9	0.8494	224.09	1.29	253.96	43.59	119.7	17.56	178.31	1316.28	0.05	100.49	3.45	12.47	2.17	0.63	81.63
2	48	1	5.34	21.4	17.4	49	23.3	82.51	27.01	1.55	4.64	1.45	2.63	0.66	224.09	1.29	253.96	43.59	119.7	17.56	178.31	1316.28	0.05	100.49	0.06	15.3	5.07	1.56	81.63
2	48	0	303.21	12	16	57	14	58	33.2	1.3	4.49	1.51	3.24	0.5	340	1.48	253.96	43.59	119.7	17.56	178.31	1316.28	0.05	100.49	2.75	15.86	4.24	1.49	81.63
2	48	0	303.21	26	27	55	18	82.51	27.01	1.55	5.15	1.23	2.9	1.97	224.09	1.29	253.96	43.59	119.7	17.56	178.31	1316.28	0.05	100.49	2.75	15.86	4.24	1.49	81.63
1	48	1	303.21	34.4	24.4	67	21.2	86	33.8	1.2	5.46	0.86	2.52	1.02	25	1.03	253.96	43.59	119.7	17.56	178.31	1316.28	0.05	100.49	2.75	15.86	4.24	1.49	81.63
2	48	1	303.21	25.06	26.4	81.06	43	82.51	27.01	1.55	5.5	1.23	2.9	0.8494	224.09	1.29	253.96	43.59	119.7	17.56	178.31	1316.28	0.05	100.49	2.75	15.86	4.24	1.49	81.63
1	48	2	303.21	60.5	34.3	84	60.2	70	23.3	1.6	4.23	1.06	3.18	1.3	27	1.55	253.96	43.59	119.7	17.56	178.31	1316.28	0.05	100.49	2.75	15.86	4.24	1.49	81.63
2	48	2	303.21	10.6	19.8	55	13.3	82.51	27.01	1.55	5.02	1.23	2.9	0.8494	224.09	1.29	253.96	43.59	119.7	17.56	178.31	1316.28	0.05	100.49	2.33	14.51	4.76	1.7	81.63
2	48	2	303.21	20	15	69	16	82.51	27.01	1.55	5.76	1.23	2.9	0.99	224.09	1.29	253.96	43.59	119.7	17.56	178.31	1316.28	0.05	100.49	2.75	15.86	4.24	1.49	81.63
1	48	2	303.21	19	23	87	13	82.51	31.8	1.5	4.82	1.23	2.9	0.8494	224.09	1.29	253.96	43.59	119.7	17.56	178.31	1316.28	0.05	100.49	2.75	15.86	4.24	1.49	81.63
2	48	1	303.21	10	18	54	9	82.51	27.01	1.55	5.27	1.23	2.9	0.8494	224.09	1.29	253.96	43.59	119.7	17.56	178.31	1316.28	0.05	100.49	2.75	15.86	4.24	1.49	81.63
1	48	0	303.21	14	18	75	20	56	27.1	1.6	5.11	1.16	2.37	0.58	186	1.31	253.96	43.59	119.7	17.56	178.31	1316.28	0.05	100.49	2.75	15.86	4.24	1.49	81.63
2	48	1	10.88	18	21	61	11	59	32.7	1.3	5.23	1.23	2.9	0.87	86.5	1.18	187	37	115	42	143	1316.28	0.05	100.49	2.63	15.2	4.08	1.46	81.63
2	48	0	143	13	18	49	15	55	25.5	1.7	4.69	1.23	2.9	0.46	69	1.3	135	25	46	6	106	22.5	0	0	2.04	14.4	4.7	1.58	81.63
2	48	2	303.21	15	23	61	12	82.51	27.01	1.55	5.1	1.23	2.9	0.8494	224.09	1.29	253.96	43.59	119.7	17.56	178.31	1316.28	0.05	100.49	2.75	15.86	4.24	1.49	81.63
2	48	1	303.21	25.06	26.4	81.06	43	82.51	27.01	1.55	5.5	1.23	2.9	0.8494	224.09	1.29	253.96	43.59	119.7	17.56	178.31	1316.28	0.05	100.49	2.75	15.86	4.24	1.49	81.63
2	48	1	303.21	25.06	26.4	81.06	43	82.51	27.01	1.55	5.5	1.23	2.9	0.8494	224.09	1.29	253.96	43.59	119.7	17.56	178.31	1316.28	0.05	100.49	2.75	15.86	4.24	1.49	81.63
1	48	1	813	28	20	70	46.3	52	29.8	1.6	5.48	1.22	4.19	1.22	128	1.41	171	34.7	78	10	122	0	0.01	0	1.28	16.3	4.9	1.38	2.61
2	48	0	1144.2	73	25	64	16	78	27.9	1.4	5.72	1.23	2.9	0.42	339.4	0.75	103	21	13	8	81	25	0	0	2.13	18.9	5.23	1.9	81.63
2	48	0	303.21	25.06	26.4	81.06	43	82.51	27.01	1.55	5.2	1.23	2.9	0.8494	224.09	1.29	253.96	43.59	119.7	17.56	178.31	1316.28	0.05	100.49	2.75	15.86	4.24	1.49	81.63
2	48	2	303.21	13	17	57	12	82.51	27.01	1.55	5.29	1.23	2.9	0.8494	224.09	1.29	253.96	43.59	119.7	17.56	178.31	1316.28	0.05	100.49	1.47	15.74	4.19	1.5	81.63
2	48	0	94.7	58	26	69	64	43	33.1	1.2	5.5	1.23	2.9	1.29	59	1.05	135	21	36	7	99	32.2	0	0	1.13	16.2	3.9	1.24	4.26
1	48	2	303.21	19	19	99	18	82.51	27.01	1.55	5.13	1.23	2.9	0.8494	224.09	1.29	253.96	43.59	119.7	17.56	178.31	1316.28	0.05	100.49	2.75	15.86	4.24	1.49	81.63
2	48	1	303.21	25.06	26.4	81.06	43	82.51	27.01	1.55	5.5	1.23	2.9	0.8494	224.09	1.29	253.96	43.59	119.7	17.56	178.31	1316.28	0.05	100.49	2.75	15.86	4.24	1.49	81.63
1	48	1	303.21	9	13	71	17	67	34.9	1	4.13	1.23	2.9	0.8494	224.09	1.29	253.96	43.59	119.7	17.56	178.31	0	0.02	42.54	2.98	14.5	4.25	1.81	10.17
1	48	0	303.21	21	19	65	16	68	34	1.1	4.75	1.23	2.9	0.91	336	1.13	253.96	43.59	119.7	17.56	178.31	1316.28	0.05	100.49	2.75	15.86	4.24	1.49	81.63
2	48	0	303.21	12	11	82	25	75	38.4	1	6.65	1.23	2.9	0.72	272	1.36	131	21	65	8	117	1316.28	0.05	100.49	2.75	15.86	4.24	1.49	81.63
1	48	2	303.21	10	17	80	21	72	28.5	1.6	4.8	1.47	1.8	0.36	61	1.51	253.96	43.59	119.7	17.56	178.31	1316.28	0.05	100.49	2.75	15.86	4.24	1.49	81.63
2	48	3	303.21	25.06	26.4	81.06	43	82.51	27.01	1.55	5.5	1.23	2.9	0.8494	224.09	1.29	253.96	43.59	119.7	17.56	178.31	1316.28	0.05	100.49	2.75	15.86	4.24	1.49	81.63
2	48	2	303.21	25.06	26.4	81.06	43	82.51	27.01	1.55	5.5	1.23	2.9	0.8494	224.09	1.29	253.96	43.59	119.7	17.56	178.31	1316.28	0.05	100.49	2.75	15.86	4.24	1.49	81.63
1	48	2	303.21	33	24	77	20	82.51	27.01	1.55	4.85	1.23	2.9	0.8494	224.09	1.29	253.96	43.59	119.7	17.56	178.31	1316.28	0.05	100.49	2.75	15.86	4.24	1.49	81.63
2	48	1	303.21	12	16	61	16	82.51	27.01	1.55	4.88	1.23	2.9	0.55	224.09	1.29	253.96	43.59	119.7	17.56	178.31	1316.28	0.05	100.49	2.75	15.86	4.24	1.49	81.63
2	48	2	303.21	12	14	50	10	82.51	27.01	1.55	4.88	1.23	2.9	0.8494	224.09	1.29	253.96	43.59	119.7	17.56	178.31	1316.28	0.05	100.49	2.75	15.86	4.24	1.49	81.63
1	48	1	236.1	12	16	66	14	49	22.4	2	4.36	1.23	2.9	0.71	89.8	1.14	229	30	53	8	150	1316.28	0.05	100.49	2.04	16.93	4.76	1.81	81.63
2	48	1	303.21	13	21	58	17	82.51	33.3	1.3	5.05	1.23	2.9	0.8494	224.09	1.29	253.96	43.59	119.7	17.56	178.31	1316.28	0.05	100.49	2.18	17.41	4.16	1.17	81.63
2	48	0	303.21	9	16	60	9	82.51	27.01	1.55	4.58	1.23	2.9	0.8494	224.09	1.29	253.96	43.59	119.7	17.56	178.31	1316.28	0.05	100.49	2.75	15.86	4.24	1.49	81.63
2	48	0	303.21	13	17	63	19	82.51	27.4	1.8	5.23	1.23	2.9	0.8494	224.09	1.29	253.96	43.59	119.7	17.56	178.31	1316.28	0.05	100.49	2.75	15.86	4.24	1.49	81.63
2	48	2	303.21	10	22.1	55	8.5	51	26.1	1.7	5.06	1.85	2.22	0.42	34	1.9	253.96	43.59	119.7	17.56	178.31	1316.28	0.05	100.49	2.75	15.86	4.24	1.49	81.63
2	48	1	303.21	28	20	61	29	82.51	27.01	1.55	5.17	1.23	2.9	1.68	224.09	1.29	253.96	43.59	119.7	17.56	178.31	1316.28	0.05	100.49	2.75	15.86	4.24	1.49	81.63
2	48	2	303.21	25.06	26.4	81.06	43	82.51	27.01	1.55	5.5	1.23	2.9	0.8494	224.09	1.29	253.96	43.59	119.7	17.56	178.31	1316.28	0.05	100.49	2.75	15.86	4.24	1.49	81.63
1	48	2	303.21	25	23	85	17	80	32.3	1.5	4.75	1.25	3.26	0.77	346	1.29	180	33	109	16	131	1316.28	0.05	100.49	1.59	17.2	5.08	1.49	81.63
2	48	1	303.21	11	20	50	13	42	25.5	1.7	4.87	1.23	2.9	0.8494	224.09	1.29	253.96	43.59	119.7	17.56	178.31	1316.28	0.05	100.49	2.75	15.86	4.24	1.49	81.63
2	48	0	303.21	20.9	22	81.06	9.2	82.51	29.2	1.5	5.5	1.23	2.9	0.8494	224.09	1.29	253.96	43.59	119.7	17.56	178.31	1316.28	0.05	100.49	2.75	15.86	4.24	1.49	81.63
2	48	2	303.21	16.9	17.6	60	19.1	55	21.7	1.8	4.55	1.02	2.25	0.85	77	1.3	253.96	43.59	119.7	17.56	178.31	1316.28	0.05	100.49	2.75	15.86	4.24	1.49	81.63
1	48	1	339.4	32	24	103	29	38	26.3	1.4	4.81	1.23	2.9	1.34	264.9	1.03	145	29	50	8	115	18.2	0	0	2.98	17.66	4.16	1.17	81.63
2	48	1	303.21	25.06	26.4	81.06	43	82.51	27.01	1.55	5.5	1.23	2.9	0.8494	224.09	1.29	253.96	43.59	119.7	17.56	178.31	1316.28	0.05	100.49	2.75	15.86	4.24	1.49	81.63
2	48	3	303.21	42	25	52	17	82.51	27.01	1.55	4.63	1.23	2.9	0.8494	224.09	1.29	253.96	43.59	119.7	17.56	178.31	1316.28	0.05	100.49	2.75	15.86	4.24	1.49	81.63
2	48	2	303.21	25.06	26.4	81.06	43	82.51	27.01	1.55	5.5	1.23	2.9	0.8494	224.09	1.29	253.96	43.59	119.7	17.56	178.31	1316.28	0.05	100.49	2.75	15.86	4.24	1.49	81.63
1	47	0	303.21	47.8	22.5	66	135.6	87	34	1.4	5.59	1.44	4.14	1.28	224.09	1.29	253.96	43.59	119.7	17.56	178.31	1316.28	0.05	100.49	2.75	15.86	4.24	1.49	81.63
2	47	0	303.21	15	30	59	14	63	24.6	1.7	4.2	1.23	2.9	0.8494	224.09	1.29	253.96	43.59	119.7	17.56	178.31	1316.28	0.05	100.49	2.75	15.86	4.24	1.49	81.63
2	47	0	303.21	5	13	50	8	55	24	1.8	5.38	1.23	2.9	0.8494	54.4	1.5	253.96	43.59	119.7	17.56	178.31	1316.28	0.05	100.49	2.75	15.86	4.24	1.49	81.63
2	47	2	303.21	25.06	26.4	81.06	43	82.51	27.01	1.55	5.5	1.23	2.9	0.8494	224.09	1.29	253.96	43.59	119.7	17.56	178.31	1316.28	0.05	100.49	2.75	15.86	4.24	1.49	81.63
2	47	0	303.21	9	12	58	12	82.51	27.01	1.55	5	1.23	2.9	1.06	224.09	1.29	253.96	43.59	119.7	17.56	178.31	1316.28	0.05	100.49	2.75	15.86	4.24	1.49	81.63
2	47	2	303.21	18	17	48	15	82.51	27.01	1.55	5.68	1.23	2.9	0.8494	224.09	1.29	253.96	43.59	119.7	17.56	178.31	1316.28	0.05	100.49	2.75	15.86	4.24	1.49	81.63
2	47	2	303.21	44	50	56	25	44	31.3	1.4	5.11	1.23	2.9	0.8494	224.09	1.29	253.96	43.59	119.7	17.56	178.31	1316.28	0.05	100.49	2.75	15.86	4.24	1.49	81.63
2	47	2	30.2	40	31	52	12	44	26.9	1.8	4.89	1.23	2.9	0.7	24.8	1.41	162	31	94	6	123	1316.28	0.05	100.49	1.55	16.98	5.22	2.2	81.63
1	47	2	303.21	13	16	63	15	82.51	27.01	1.55	5.48	1.23	2.9	0.8494	224.09	1.29	253.96	43.59	119.7	17.56	178.31	1316.28	0.05	100.49	2.75	15.86	4.24	1.49	81.63
1	47	3	315	13	18	170	18.3	93	35.5	1.2	8.39	1.26	2	0.55	140.8	1.15	158	23.2	136	11	101	1316.28	0.05	100.49	1.23	16.9	4.36	1.22	81.63
2	47	2	44.6	13	18	60	19	52	31.8	1.3	5.51	1.67	2.93	0.65	124.2	1.79	138	21	148	8	110	1316.28	0.05	100.49	2.75	15.86	4.24	1.49	81.63
1	47	0	303.21	21	16	115	13	56	23	1.9	5.14	0.84	2.13	0.48	56	1.03	253.96	43.59	119.7	17.56	178.31	1316.28	0.05	100.49	2.75	15.86	4.24	1.49	81.63
2	47	0	303.21	6	13	58	9	82.51	27.01	1.55	4.87	1.23	2.9	0.8494	224.09	1.29	253.96	43.59	119.7	17.56	178.31	1316.28	0.05	100.49	2.75	15.86	4.24	1.49	81.63
2	47	1	303.21	10	19	100	17	60	28.9	1.7	5.25	1.23	2.9	0.8494	224.09	1.29	253.96	43.59	119.7	17.56	178.31	1316.28	0.05	100.49	2.75	15.86	4.24	1.49	81.63
2	47	3	303.21	11	23	70	10	82.51	27.01	1.55	4.69	1.23	2.9	0.8494	224.09	1.29	253.96	43.59	119.7	17.56	178.31	1316.28	0.05	100.49	1.89	17.3	4.64	1.67	81.63
2	47	3	303.21	9	19	58	12	82.51	27.01	1.55	5.41	1.23	2.9	0.6	224.09	1.29	253.96	43.59	119.7	17.56	178.31	1316.28	0.05	100.49	2.75	15.86	4.24	1.49	81.63
2	47	2	303.21	10	13	81	15	46	32	1.4	4.94	1.23	2.9	0.45	36.8	1.69	253.96	43.59	119.7	17.56	178.31	1316.28	0.05	100.49	2.75	15.86	4.24	1.49	81.63
2	47	1	303.21	9	16	77	13	82.51	32.4	1.4	5.02	1.23	2.9	0.79	224.09	1.29	253.96	43.59	119.7	17.56	178.31	1316.28	0.05	100.49	1.31	14.7	3.93	1.26	81.63
2	47	2	303.21	26.3	19.7	61	19.4	82.51	26.6	1.7	5.21	1.23	2.9	0.8494	224.09	1.29	253.96	43.59	119.7	17.56	178.31	1316.28	0.05	100.49	2.76	17.6	4.27	2.03	81.63
2	47	1	303.21	19	18	44	49	82.51	27.01	1.55	6.13	1.23	2.9	1.07	224.09	1.29	253.96	43.59	119.7	17.56	178.31	1316.28	0.05	100.49	2.75	15.86	4.24	1.49	81.63
2	47	0	74.87	8	13	71	19	82.51	27.01	1.55	5.38	1.23	2.9	0.8494	224.09	1.29	253.96	43.59	119.7	17.56	178.31	1316.28	0.05	100.49	2.75	15.86	4.24	1.49	81.63
1	47	3	303.21	22	20	80	74.4	82.51	27.01	1.55	9.28	1.39	2.43	0.92	224.09	1.29	131	21	72	9	103	1316.28	0.05	100.49	2.75	15.86	4.24	1.49	81.63
2	47	0	303.21	9	15	81.06	11	82.51	26.6	1.6	5.5	1.23	2.9	0.8494	224.09	1.29	253.96	43.59	119.7	17.56	178.31	1316.28	0.05	100.49	2.75	15.86	4.24	1.49	81.63
2	47	2	303.21	12	14	67	11	82.51	27.01	1.55	4.87	1.23	2.9	0.8494	224.09	1.29	253.96	43.59	119.7	17.56	178.31	1316.28	0.05	100.49	3.05	15.87	4.46	1.81	81.63
1	47	2	303.21	30	19	72	41.5	83	25.6	1.9	4.77	1.28	3.81	1.58	63	1.62	253.96	43.59	119.7	17.56	178.31	1316.28	0.05	100.49	2.75	15.86	4.24	1.49	81.63
2	47	2	303.21	13	13	58	25	61	18.2	2.3	8.23	1.23	2.9	0.8494	224.09	1.29	253.96	43.59	119.7	17.56	178.31	1316.28	0.05	100.49	2.75	15.86	4.24	1.49	81.63
2	47	0	303.21	29	24	43	28	82.51	23.2	1.9	5.39	1.23	2.9	0.8494	224.09	1.29	253.96	43.59	119.7	17.56	178.31	1316.28	0.05	100.49	2.75	15.86	4.24	1.49	81.63
2	47	2	303.21	45	27	46	40	82.51	27.01	1.55	6.32	1.23	2.9	0.8494	224.09	1.29	253.96	43.59	119.7	17.56	178.31	1316.28	0.05	100.49	2.75	15.86	4.24	1.49	81.63
2	47	1	303.21	23	22	63	22	82.51	27.01	1.55	4.55	1.23	2.9	0.8494	224.09	1.29	253.96	43.59	119.7	17.56	178.31	1316.28	0.05	100.49	2.75	15.86	4.24	1.49	81.63
2	47	0	303.21	10	15	50	9	82.51	27.01	1.55	5.27	1.23	2.9	0.67	224.09	1.29	253.96	43.59	119.7	17.56	178.31	1316.28	0.05	100.49	0.78	16.71	4.02	1.23	81.63
2	47	1	303.21	25.06	26.4	81.06	43	82.51	27.01	1.55	5.5	1.23	2.9	0.8494	224.09	1.29	253.96	43.59	119.7	17.56	178.31	1316.28	0.05	100.49	2.75	15.86	4.24	1.49	81.63
2	47	0	303.21	11	15	54	15	59	24.8	1.6	4.85	0.88	2.62	1.05	329	1.2	253.96	43.59	119.7	17.56	178.31	1316.28	0.05	100.49	2.75	15.86	4.24	1.49	81.63
2	47	1	303.21	25.06	26.4	81.06	43	82.51	27.01	1.55	5.5	1.23	2.9	0.8494	224.09	1.29	253.96	43.59	119.7	17.56	178.31	1316.28	0.05	100.49	2.75	15.86	4.24	1.49	81.63
2	47	0	303.21	29	20	64	40	82.51	27.01	1.55	4.89	1.23	2.9	0.8494	224.09	1.29	253.96	43.59	119.7	17.56	178.31	1316.28	0.05	100.49	2.75	15.86	4.24	1.49	81.63
1	47	0	303.21	25.06	26.4	81.06	43	82.51	27.01	1.55	5.5	1.23	2.9	0.8494	224.09	1.29	253.96	43.59	119.7	17.56	178.31	1316.28	0.05	100.49	2.75	15.86	4.24	1.49	81.63
2	47	2	303.21	11	17	56	16	82.51	27.01	1.55	5.06	1.23	2.9	0.87	224.09	1.29	253.96	43.59	119.7	17.56	178.31	1316.28	0.05	100.49	2.75	15.86	4.24	1.49	81.63
2	47	2	303.21	17	23	66	16	82.51	28.8	1.6	5.5	1.23	2.9	1.44	224.09	1.29	253.96	43.59	119.7	17.56	178.31	1316.28	0.05	100.49	2.75	15.86	4.24	1.49	81.63
2	47	0	5.84	18	19	67	43	82.51	27.01	1.55	4.28	1.23	2.9	0.8494	224.09	1.29	127	21	23	9	99	13.6	0	23.07	1.45	15.19	3.63	1.25	2.85
2	47	1	303.21	8	13	63	15	82.51	27.01	1.55	4.94	1.23	2.9	0.68	224.09	1.29	253.96	43.59	119.7	17.56	178.31	1316.28	0.05	100.49	2.75	15.86	4.24	1.49	81.63
2	47	0	303.21	10	20	54	14	82.51	33.1	1.4	4.46	1.23	2.9	1.09	224.09	1.29	253.96	43.59	119.7	17.56	178.31	1316.28	0.05	100.49	2.75	15.86	4.24	1.49	81.63
2	47	2	303.21	13	13	54	17	82.51	27.01	1.55	5.79	1.23	2.9	0.79	224.09	1.29	253.96	43.59	119.7	17.56	178.31	1316.28	0.05	100.49	2.75	15.86	4.24	1.49	81.63
2	47	2	29.6	12.8	13.9	51	11.1	82.51	27.01	1.55	4.92	1.13	2.33	0.88	224.09	1.29	253.96	43.59	119.7	17.56	178.31	1316.28	0.05	100.49	1.28	17.2	5.82	2.29	81.63
1	47	2	303.21	21.3	18.4	73	25.2	57	20.8	2.2	4.73	1.14	2.95	0.9	41	1.38	253.96	43.59	119.7	17.56	178.31	1316.28	0.05	100.49	2.75	15.86	4.24	1.49	81.63
2	47	0	303.21	5	16	60	11	82.51	27.01	1.55	5.19	1.23	2.9	1	224.09	1.29	253.96	43.59	119.7	17.56	178.31	1316.28	0.05	100.49	2.75	15.86	4.24	1.49	81.63
2	47	2	303.21	25.06	26.4	81.06	43	82.51	27.01	1.55	5.5	1.23	2.9	0.8494	224.09	1.29	253.96	43.59	119.7	17.56	178.31	1316.28	0.05	100.49	2.75	15.86	4.24	1.49	81.63
2	47	0	303.21	25.06	26.4	81.06	43	82.51	27.01	1.55	5.5	1.23	2.9	0.8494	224.09	1.29	253.96	43.59	119.7	17.56	178.31	1316.28	0.05	100.49	2.75	15.86	4.24	1.49	81.63
1	47	3	303.21	25.06	26.4	81.06	43	82.51	27.01	1.55	5.5	1.23	2.9	0.8494	224.09	1.29	253.96	43.59	119.7	17.56	178.31	1316.28	0.05	100.49	2.75	15.86	4.24	1.49	81.63
2	47	0	303.21	25.06	26.4	81.06	43	82.51	27.01	1.55	5.5	1.23	2.9	0.8494	224.09	1.29	253.96	43.59	119.7	17.56	178.31	1316.28	0.05	100.49	2.75	15.86	4.24	1.49	81.63
2	47	0	303.21	10	17	58	16	82.51	27.01	1.55	4.88	1.23	2.9	0.89	224.09	1.29	253.96	43.59	119.7	17.56	178.31	1316.28	0.05	100.49	2.75	15.86	4.24	1.49	81.63
1	47	2	303.21	26	23	67	26	66	26	1.8	5.71	1.11	2.05	0.73	31	1.31	253.96	43.59	119.7	17.56	178.31	1316.28	0.05	100.49	2.75	15.86	4.24	1.49	81.63
2	47	2	303.21	25.06	26.4	81.06	43	82.51	27.01	1.55	5.5	1.23	2.9	0.8494	224.09	1.29	253.96	43.59	119.7	17.56	178.31	1316.28	0.05	100.49	2.75	15.86	4.24	1.49	81.63
1	47	2	303.21	25.06	26.4	81.06	43	82.51	27.01	1.55	5.5	1.23	2.9	0.8494	224.09	1.29	253.96	43.59	119.7	17.56	178.31	1316.28	0.05	100.49	2.75	15.86	4.24	1.49	81.63
2	47	2	303.21	9	12	51	10	31	17.8	2.2	5.15	1.23	2.9	0.78	224.09	1.29	253.96	43.59	119.7	17.56	178.31	1316.28	0.05	100.49	2.75	15.86	4.24	1.49	81.63
2	47	2	303.21	25.06	26.4	81.06	43	82.51	27.01	1.55	5.5	1.23	2.9	0.8494	224.09	1.29	253.96	43.59	119.7	17.56	178.31	1316.28	0.05	100.49	2.75	15.86	4.24	1.49	81.63
2	47	2	303.21	19	22	61	17	63	26.5	1.7	4.2	1.72	2.69	0.45	732	1.74	253.96	43.59	119.7	17.56	178.31	1316.28	0.05	100.49	2.75	15.86	4.24	1.49	81.63
2	47	2	303.21	25.06	26.4	81.06	43	82.51	27.01	1.55	5.5	1.23	2.9	0.8494	224.09	1.29	253.96	43.59	119.7	17.56	178.31	1316.28	0.05	100.49	2.75	15.86	4.24	1.49	81.63
1	47	1	303.21	21	13	80	21	49	27.7	1.7	6.23	1.23	2.9	0.93	35.4	0.99	177	28	109	10	130	32.6	0.01	0	2.75	15.86	4.24	1.49	81.63
2	47	0	303.21	25	21	63	19	62	23.5	1.8	5.46	1.23	2.9	0.8494	137.1	1.6	253.96	43.59	119.7	17.56	178.31	1316.28	0.05	100.49	2.75	15.86	4.24	1.49	81.63
1	47	2	374	13	13	69	18	63	25.3	1.7	6.52	1.23	2.9	1	211.3	1	153	27	48	9	128	1316.28	0.05	100.49	0.81	13.1	4.68	1.7	2.27
2	47	0	303.21	31	15	67	85	82.51	27.01	1.55	4.76	1.23	2.9	1.59	224.09	1.29	253.96	43.59	119.7	17.56	178.31	1316.28	0.05	100.49	2.75	15.86	4.24	1.49	81.63
2	47	3	303.21	8	17	64	11	82.51	27.01	1.55	5.36	1.23	2.9	0.8494	224.09	1.29	253.96	43.59	119.7	17.56	178.31	1316.28	0.05	100.49	2.75	15.86	4.24	1.49	81.63
2	47	2	303.21	9.1	14.1	68	13.6	41	22.2	1.9	4.44	1.54	3.5	0.7	229	1.59	146	21	372	10	96	64.2	0	260.8	2.34	16	3.77	1.49	22.75
2	47	2	181	17.2	14.1	61	102.6	99	26.5	1.3	5	1.39	2.17	0.6	78	1.48	133	19.8	29	5	85	102.6	0	0	2.47	14.5	4.46	1.63	127
2	47	0	303.21	25.06	26.4	81.06	43	82.51	27.01	1.55	5.5	1.23	2.9	0.8494	224.09	1.29	253.96	43.59	119.7	17.56	178.31	1316.28	0.05	100.49	2.75	15.86	4.24	1.49	81.63
2	47	2	303.21	25.06	26.4	81.06	43	82.51	27.01	1.55	5.5	1.23	2.9	0.8494	224.09	1.29	253.96	43.59	119.7	17.56	178.31	1316.28	0.05	100.49	2.75	15.86	4.24	1.49	81.63
2	47	1	303.21	14.1	19	60	11.3	56	28.5	1.4	5.25	1.3	4.31	1.3	114	1.29	253.96	43.59	119.7	17.56	178.31	1316.28	0.05	100.49	2.75	15.86	4.24	1.49	81.63
2	47	1	303.21	9	10	48	9	82.51	27.01	1.55	4.23	1.23	2.9	0.83	224.09	1.29	253.96	43.59	119.7	17.56	178.31	1316.28	0.05	100.49	2.75	15.86	4.24	1.49	81.63
2	47	2	303.21	9	14	62	13	61	22.9	1.9	5.16	1.23	2.9	0.8494	62.4	1.3	253.96	43.59	119.7	17.56	178.31	1316.28	0.05	100.49	2.75	15.86	4.24	1.49	81.63
2	47	0	303.21	19	19	65	10	82.51	27.01	1.55	5.19	1.23	2.9	0.8494	224.09	1.29	253.96	43.59	119.7	17.56	178.31	1316.28	0.05	100.49	2.75	15.86	4.24	1.49	81.63
2	47	2	303.21	9	10	53	9	82.51	27.01	1.55	4.47	1.23	2.9	0.8494	224.09	1.29	253.96	43.59	119.7	17.56	178.31	1316.28	0.05	100.49	2.75	15.86	4.24	1.49	81.63
1	47	0	303.21	115	56	77	212	55	31.9	1.6	5.06	1.03	2.8	1.01	25	1.31	253.96	43.59	119.7	17.56	178.31	1316.28	0.05	100.49	2.75	15.86	4.24	1.49	81.63
1	47	3	303.21	25.06	26.4	81.06	43	82.51	27.01	1.55	5.5	1.23	2.9	0.8494	224.09	1.29	253.96	43.59	119.7	17.56	178.31	1316.28	0.05	100.49	2.75	15.86	4.24	1.49	81.63
2	47	1	303.21	32	44	43	35	48	21	1.6	4.65	0.95	2.84	0.67	236	1.11	187	37	589	14	135	1316.28	0.05	100.49	2.75	15.86	4.24	1.49	81.63
1	47	0	303.21	19	20	69	26	78	27.3	1.7	4.91	1.64	2.89	0.41	60	1.77	253.96	43.59	119.7	17.56	178.31	1316.28	0.05	100.49	2.75	15.86	4.24	1.49	81.63
2	47	1	303.21	25.06	26.4	81.06	43	82.51	27.01	1.55	5.5	1.23	2.9	0.8494	224.09	1.29	253.96	43.59	119.7	17.56	178.31	1316.28	0.05	100.49	2.75	15.86	4.24	1.49	81.63
2	47	2	303.21	16	15	46	56.1	66	22.8	1.6	4.58	0.91	3.21	1.31	376	1.07	253.96	43.59	119.7	17.56	178.31	1316.28	0.05	100.49	2.75	15.86	4.24	1.49	81.63
2	47	2	303.21	25.06	26.4	81.06	43	82.51	27.01	1.55	5.5	1.23	2.9	0.8494	224.09	1.29	253.96	43.59	119.7	17.56	178.31	1316.28	0.05	100.49	2.75	15.86	4.24	1.49	81.63
2	47	1	303.21	10	15	51	10	82.51	27.01	1.55	5.01	1.86	3.81	0.49	224.09	1.29	253.96	43.59	119.7	17.56	178.31	1316.28	0.05	100.49	2.75	15.86	4.24	1.49	81.63
1	47	2	303.21	19	16	98	26	58	25.9	1.8	4.79	1.23	2.37	0.32	90	1.36	253.96	43.59	119.7	17.56	178.31	1316.28	0.05	100.49	2.75	15.86	4.24	1.49	81.63
2	47	0	20.8	11	18	67	11	82.51	27.01	1.55	4.48	1.49	2.44	0.47	224.09	1.29	253.96	43.59	119.7	17.56	178.31	1316.28	0.05	100.49	2.75	15.86	4.24	1.49	81.63
1	47	2	303.21	25.06	26.4	81.06	43	82.51	27.01	1.55	5.5	1.23	2.9	0.8494	224.09	1.29	253.96	43.59	119.7	17.56	178.31	1316.28	0.05	100.49	2.75	15.86	4.24	1.49	81.63
2	47	2	303.21	38	25	58	28	70	35.8	1.3	6.29	1.23	2.9	1.25	231.4	1.54	153	24	52	9	117	1316.28	0.05	100.49	1.56	14.2	5.54	1.84	81.63
2	47	0	303.21	19	20	58	12	54	28	1.6	5.15	1.23	2.9	0.98	50.4	1.89	253.96	43.59	119.7	17.56	178.31	1316.28	0.05	100.49	2.75	15.86	4.24	1.49	81.63
2	47	0	303.21	8	16	67	10	54	30.4	1.4	5.09	1.23	2.9	0.8494	224.09	1.29	253.96	43.59	119.7	17.56	178.31	1316.28	0.05	100.49	2.75	15.86	4.24	1.49	81.63
2	47	1	303.21	16	21	53	12	44	31.9	1.4	5.09	1.23	2.9	1.04	156.3	1.73	253.96	43.59	119.7	17.56	178.31	1316.28	0.05	100.49	2.75	15.86	4.24	1.49	81.63
2	47	2	303.21	32	20	52	25	82.51	26.3	1.6	5.94	1.23	2.9	0.91	224.09	1.29	253.96	43.59	119.7	17.56	178.31	1316.28	0.05	100.49	2.75	15.86	4.24	1.49	81.63
2	47	1	303.21	8	17	41	14	82.51	27.01	1.55	5.09	1.55	2.65	0.47	224.09	1.29	253.96	43.59	119.7	17.56	178.31	1316.28	0.05	100.49	2.75	15.86	4.24	1.49	81.63
2	47	3	303.21	25.06	26.4	81.06	43	82.51	27.01	1.55	5.5	1.23	2.9	0.8494	224.09	1.29	253.96	43.59	119.7	17.56	178.31	1316.28	0.05	100.49	2.75	15.86	4.24	1.49	81.63
2	47	1	303.21	12	18	53	10	82.51	27.01	1.55	5.19	1.23	2.9	0.93	224.09	1.29	253.96	43.59	119.7	17.56	178.31	1316.28	0.05	100.49	2.24	14.9	3.83	1.49	81.63
2	47	3	303.21	11.9	17.8	51	9.3	82.51	27.01	1.55	4.49	1.23	2.27	0.92	224.09	1.29	253.96	43.59	119.7	17.56	178.31	1316.28	0.05	100.49	2.75	15.86	4.24	1.49	81.63
1	47	1	303.21	47	25	72	175	82.51	27.01	1.55	5.26	1.23	2.9	0.8494	224.09	1.29	253.96	43.59	119.7	17.56	178.31	1316.28	0.05	100.49	2.75	15.86	4.24	1.49	81.63
2	47	2	303.21	19	20	52	12.3	63	28.1	1.7	5.27	1.23	2.9	0.8494	224.09	1.29	253.96	43.59	119.7	17.56	178.31	1316.28	0.05	100.49	2.75	15.86	4.24	1.49	81.63
2	47	1	303.21	9	15	64	12	82.51	27.01	1.55	5.1	1.23	2.9	0.95	224.09	1.29	253.96	43.59	119.7	17.56	178.31	1316.28	0.05	100.49	2.75	15.86	4.24	1.49	81.63
2	47	0	303.21	8	11	50	17	82.51	27.01	1.55	4.53	1.23	2.9	0.8494	224.09	1.29	253.96	43.59	119.7	17.56	178.31	1316.28	0.05	100.49	2.75	15.86	4.24	1.49	81.63
2	47	1	303.21	6.1	16	61	6.9	44	21.7	1.5	5.34	1.74	2.49	0.63	138	1.68	171	34	64	10.7	133	1316.28	0.05	100.49	2.06	18.9	5.1	1.76	81.63
2	47	0	303.21	25.06	26.4	81.06	43	82.51	27.01	1.55	5.5	1.23	2.9	0.8494	224.09	1.29	253.96	43.59	119.7	17.56	178.31	1316.28	0.05	100.49	2.75	15.86	4.24	1.49	81.63
2	47	1	303.21	17	18.1	59	22	82.51	27.01	1.55	5.4	1.23	2.9	0.87	224.09	1.29	187	28.4	81	8	138	1316.28	0.05	100.49	2.75	15.86	4.24	1.49	81.63
2	47	0	303.21	14.1	18.5	69	15.7	82.51	34.6	1.3	5.76	1.23	2.9	0.8494	224.09	1.29	253.96	43.59	119.7	17.56	178.31	1316.28	0.05	100.49	2.75	15.86	4.24	1.49	81.63
2	47	3	303.21	14	18	44	7	82.51	27.01	1.55	4.51	1.23	2.9	0.65	224.09	1.29	253.96	43.59	119.7	17.56	178.31	1316.28	0.05	100.49	2.75	15.86	4.24	1.49	81.63
2	47	3	303.21	23	27	62	21	82.51	27.01	1.55	5.49	1.23	2.9	0.8494	224.09	1.29	253.96	43.59	119.7	17.56	178.31	1316.28	0.05	100.49	2.75	15.86	4.24	1.49	81.63
2	47	1	303.21	16	24	56	13	82.51	27.01	1.55	5.64	1.23	2.9	0.44	224.09	1.29	253.96	43.59	119.7	17.56	178.31	1316.28	0.05	100.49	2.75	15.86	4.24	1.49	81.63
1	47	0	362.8	61	38	56	61	108	24.2	1.7	5.03	1.23	2.9	0.8494	49.2	1.1	202	35	298	17	169	76.5	0	29.87	1.22	17.23	4.48	1.67	81.63
2	47	2	303.21	7	14	70	10	68	25.2	1.8	5.03	1.23	2.9	0.8494	256	1.7	253.96	43.59	119.7	17.56	178.31	1316.28	0.05	100.49	1.83	14.87	4.88	1.72	81.63
2	47	0	303.21	25.06	26.4	81.06	43	82.51	27.01	1.55	5.5	1.23	2.9	0.8494	224.09	1.29	253.96	43.59	119.7	17.56	178.31	1316.28	0.05	100.49	2.75	15.86	4.24	1.49	81.63
1	47	0	303.21	21	21	74	57	56	25.1	1.9	6.3	0.9	2.99	1.18	625	1.33	253.96	43.59	119.7	17.56	178.31	1316.28	0.05	100.49	2.75	15.86	4.24	1.49	81.63
2	47	2	303.21	17	21	54	16	82.51	29.6	1.6	5.79	1.23	2.9	0.43	134.9	1.56	253.96	43.59	119.7	17.56	178.31	1316.28	0.05	100.49	2.59	12.9	5.02	1.59	81.63
2	46	1	303.21	11	20	52	14	82.51	27.01	1.55	5.64	1.23	2.9	1.01	224.09	1.29	253.96	43.59	119.7	17.56	178.31	1316.28	0.05	100.49	2.75	15.86	4.24	1.49	81.63
2	46	0	303.21	7	16	52	9	42	16.5	2.1	5.93	1.23	2.9	1.83	242.8	1.32	253.96	43.59	119.7	17.56	178.31	1316.28	0.05	100.49	2.75	15.86	4.24	1.49	81.63
2	46	1	303.21	22	22	59	19	82.51	27.01	1.55	5.79	1.23	2.9	0.82	224.09	1.29	253.96	43.59	119.7	17.56	178.31	1316.28	0.05	100.49	2.75	15.86	4.24	1.49	81.63
1	46	2	738.4	15	25	97	38	75	33.2	1.2	5.03	1.23	2.9	1.7	96.6	0.94	182	25	190	8	140	28.2	0.01	26.85	2.07	16.81	3.75	1.09	81.63
2	46	0	303.21	12	19	62	8.7	48	24.7	1.7	4.47	1.12	3.04	0.98	58	1.32	253.96	43.59	119.7	17.56	178.31	1316.28	0.05	100.49	2.75	15.86	4.24	1.49	81.63
2	46	3	36.38	15	17	57	30	69	33.3	1.4	6	1.23	2.9	1.25	83.9	1.32	146	24	51	6	117	81	0.01	0	0.86	15.94	4.6	1.7	3.02
2	46	0	303.21	10	17	57	14	51	27.5	1.6	4.74	1.31	2.23	0.43	84	1.41	253.96	43.59	119.7	17.56	178.31	1316.28	0.05	100.49	2.75	15.86	4.24	1.49	81.63
2	46	2	303.21	25.06	26.4	81.06	43	82.51	27.01	1.55	5.5	1.23	2.9	0.8494	224.09	1.29	253.96	43.59	119.7	17.56	178.31	1316.28	0.05	100.49	2.75	15.86	4.24	1.49	81.63
1	46	2	303.21	37.2	21.2	82	26.7	82.51	27.01	1.55	6.19	1.44	3.49	1.15	224.09	1.29	253.96	43.59	119.7	17.56	178.31	1316.28	0.05	100.49	2.75	15.86	4.24	1.49	81.63
1	46	1	303.21	19	17	66	42	82.51	27.01	1.55	6.11	1.23	2.9	0.8494	224.09	1.29	253.96	43.59	119.7	17.56	178.31	1316.28	0.05	100.49	2.75	15.86	4.24	1.49	81.63
2	46	0	303.21	8	15	60	11	82.51	27.01	1.55	5.01	1.23	2.9	0.8494	224.09	1.29	253.96	43.59	119.7	17.56	178.31	1316.28	0.05	100.49	2.75	15.86	4.24	1.49	81.63
2	46	2	303.21	95	48	63	23	59	35.3	1.3	5.98	1.18	4.06	1.02	102	1.46	253.96	43.59	119.7	17.56	178.31	1316.28	0.05	100.49	2.48	17.8	4.22	1.6	81.63
2	46	1	303.21	16	16	81.06	43	82.51	27.01	1.55	5.5	1.23	2.9	0.8494	224.09	1.29	128	26	41	8	101	1316.28	0.05	100.49	2.75	15.86	4.24	1.49	81.63
2	46	1	303.21	15	12	53	17	82.51	27.01	1.55	5.14	1.23	2.9	1.1	224.09	1.29	253.96	43.59	119.7	17.56	178.31	1316.28	0.05	100.49	2.75	15.86	4.24	1.49	81.63
1	46	0	303.21	22	27	82	17	56	26.6	1.6	4.37	1.23	2.9	0.61	382	1.26	253.96	43.59	119.7	17.56	178.31	1316.28	0.05	100.49	2.75	15.86	4.24	1.49	81.63
2	46	1	303.21	25.06	26.4	81.06	43	82.51	27.01	1.55	5.5	1.23	2.9	0.8494	224.09	1.29	253.96	43.59	119.7	17.56	178.31	1316.28	0.05	100.49	2.75	15.86	4.24	1.49	81.63
1	46	1	221.4	33	23	84	25	82.51	27.01	1.55	5.36	1.23	2.9	1.08	224.09	1.29	211	35	276	9	147	1316.28	0.05	100.49	2.75	15.86	4.24	1.49	81.63
2	46	0	303.21	21	18	80	123	82.51	27.01	1.55	6.17	1.54	2.78	0.79	224.09	1.29	253.96	43.59	119.7	17.56	178.31	1316.28	0.05	100.49	2.75	15.86	4.24	1.49	81.63
2	46	1	135	20	17	49	42	34	24.3	1.8	5.37	1.44	2.54	0.82	62	1.29	141	25	66	5	114	1316.28	0.05	100.49	2.16	15.5	5.41	1.71	81.63
2	46	1	303.21	16	16	68	15	82.51	27.01	1.55	4.93	1.23	2.9	0.8494	224.09	1.29	253.96	43.59	119.7	17.56	178.31	1316.28	0.05	100.49	2.75	15.86	4.24	1.49	81.63
2	46	2	303.21	11	18	59	9	82.51	27.01	1.55	5.07	1.51	2.37	0.42	224.09	1.29	253.96	43.59	119.7	17.56	178.31	1316.28	0.05	100.49	1.16	16.4	4.77	1.45	81.63
1	46	1	303.21	37.1	23.8	81	43	82.51	27.01	1.55	5.5	1.23	2.9	0.8494	224.09	1.29	166	29.9	204	10.3	128	65.2	0.01	43.55	2.75	15.86	4.24	1.49	81.63
2	46	0	303.21	12	22	55	15	51	28	1.7	4.8	1.23	2.9	0.44	81	1.81	253.96	43.59	119.7	17.56	178.31	1316.28	0.05	100.49	2.75	15.86	4.24	1.49	81.63
2	46	0	177	25.4	23.3	78	51	60	25.2	1.8	4.87	1.45	2.78	0.99	645	1.76	174	33.8	89	10.5	136	1316.28	0.05	100.49	2.5	18.5	5.28	1.97	81.63
2	46	2	303.21	25.06	26.4	81.06	43	82.51	27.01	1.55	5.5	1.23	2.9	0.8494	224.09	1.29	253.96	43.59	119.7	17.56	178.31	1316.28	0.05	100.49	2.75	15.86	4.24	1.49	81.63
2	46	0	303.21	24	21	61	15	82.51	27.01	1.55	5.5	1.23	2.9	1.09	224.09	1.29	253.96	43.59	119.7	17.56	178.31	1316.28	0.05	100.49	2.75	15.86	4.24	1.49	81.63
2	46	1	36.6	77.1	43.8	50	67.7	77	31.2	1.5	6.36	1.32	3.37	1.39	107	1.64	184	23	52	6	121	29.5	0	0	3.68	17.9	5.75	2.32	4.46
2	46	1	303.21	17	22	54	11	82.51	27.01	1.55	5.52	1.23	2.9	0.8494	224.09	1.29	253.96	43.59	119.7	17.56	178.31	1316.28	0.05	100.49	2.75	15.86	4.24	1.49	81.63
2	46	1	303.21	25.06	26.4	81.06	43	82.51	27.01	1.55	5.5	1.23	2.9	0.8494	224.09	1.29	253.96	43.59	119.7	17.56	178.31	1316.28	0.05	100.49	3.13	16.9	5.18	1.59	81.63
1	46	2	303.21	22	21	76	26	45	28.1	1.9	5.52	1.23	2.9	1.48	82.9	1.28	253.96	43.59	119.7	17.56	178.31	1316.28	0.05	100.49	2.75	15.86	4.24	1.49	81.63
2	46	2	9.54	10	16	50	13	52	31.1	1.4	4.77	1.23	2.9	0.8	66.4	2.02	253.96	43.59	119.7	17.56	178.31	1316.28	0.05	100.49	2.75	15.86	4.24	1.49	81.63
2	46	1	303.21	9	19	61	19	80	34.5	1.3	6.58	1.23	2.9	1.7	193.1	0.8	253.96	43.59	119.7	17.56	178.31	1316.28	0.05	100.49	2.75	15.86	4.24	1.49	81.63
2	46	2	303.21	17	16	56	38	82.51	27.01	1.55	6.89	1.23	2.9	0.8494	224.09	1.29	253.96	43.59	119.7	17.56	178.31	1316.28	0.05	100.49	2.75	15.86	4.24	1.49	81.63
2	46	0	303.21	25	15	54	32	98	35.6	1.3	6.26	1.23	2.9	0.91	49	1.29	253.96	43.59	119.7	17.56	178.31	1316.28	0.05	100.49	1.18	18.26	4.46	1.51	81.63
2	46	2	303.21	23	15	56	18	59	21.5	1.7	5.26	1.23	2.9	1.16	33.2	1.08	253.96	43.59	119.7	17.56	178.31	1316.28	0.05	100.49	2.75	15.86	4.24	1.49	81.63
2	46	2	303.21	15	16	46	12	82.51	27.01	1.55	5.1	1.88	2.35	0.36	224.09	1.29	253.96	43.59	119.7	17.56	178.31	1316.28	0.05	100.49	2.75	15.86	4.24	1.49	81.63
2	46	0	303.21	14	20	48	10.6	82.51	27.01	1.55	5.34	1.49	2.86	1.01	224.09	1.29	162	33	70	7	106	1316.28	0.05	100.49	2.63	14.6	4.58	1.71	81.63
2	46	1	303.21	7	16	48	9	82.51	27.01	1.55	5.04	1.23	2.9	0.8494	224.09	1.29	253.96	43.59	119.7	17.56	178.31	1316.28	0.05	100.49	2.75	15.86	4.24	1.49	81.63
2	46	2	241	23	21	64	17.3	46	26.1	1.4	4.84	1.08	2.14	0.46	235	1.07	159	26	58	8.5	113	284.5	0	22.07	0.96	16.6	5.39	1.99	1.75
2	46	3	49.1	18	22	58	11	33	22.5	1.9	4.84	1.63	2.35	0.29	177.5	1.59	166	35	83	9	138	1316.28	0.05	100.49	1.84	17.3	4.95	1.86	81.63
2	46	2	303.21	25.06	26.4	81.06	43	82.51	27.01	1.55	5.5	1.23	2.9	0.8494	224.09	1.29	253.96	43.59	119.7	17.56	178.31	1316.28	0.05	100.49	2.75	15.86	4.24	1.49	81.63
1	46	0	203	18	20	76	14	55	32.4	1.4	5.32	1.23	2.9	0.73	82.4	1.75	253.96	43.59	119.7	17.56	178.31	1316.28	0.05	100.49	1.34	16.7	5.25	1.88	81.63
2	46	2	303.21	20	18	59	24	82.51	27.01	1.55	4.96	1.32	2.12	0.56	224.09	1.29	253.96	43.59	119.7	17.56	178.31	1316.28	0.05	100.49	2.75	15.86	4.24	1.49	81.63
1	46	0	303.21	26	18	84	21	82.51	27.01	1.55	4.87	1.23	2.9	0.8494	224.09	1.29	253.96	43.59	119.7	17.56	178.31	1316.28	0.05	100.49	2.75	15.86	4.24	1.49	81.63
2	46	2	303.21	25	35	47	28	82.51	27.01	1.55	4.71	1.23	2.9	0.78	224.09	1.29	253.96	43.59	119.7	17.56	178.31	1316.28	0.05	100.49	2.18	13	4.98	2.14	81.63
1	46	2	303.21	11	13	73	17	43	21.3	1.9	4.82	1.23	2.9	0.96	152	1.04	109	20	26	8	78	81.7	0.01	0	2.75	15.86	4.24	1.49	124.7
1	46	0	303.21	18	17	82	28	62	20	1.8	4.23	1.23	2.9	1.1	77.5	0.91	253.96	43.59	119.7	17.56	178.31	1316.28	0.05	100.49	2.75	15.86	4.24	1.49	64.2
1	46	0	303.21	50.2	30.7	83	124.6	45	19.5	2.3	4.79	1.6	2.43	1.01	71	1.9	253.96	43.59	119.7	17.56	178.31	1316.28	0.05	100.49	2.75	15.86	4.24	1.49	81.63
2	46	2	303.21	19	22	43	15	42	25.2	1.8	5.05	1.23	2.9	0.64	37.1	1.42	123	28	64	5	116	1316.28	0.05	100.49	2.75	15.86	4.24	1.49	81.63
1	46	2	303.21	35	22	66	70.7	65	25.6	1.8	4.89	0.81	3.72	1.57	62	1.01	253.96	43.59	119.7	17.56	178.31	1316.28	0.05	100.49	2.75	15.86	4.24	1.49	81.63
2	46	2	303.21	25.06	26.4	81.06	43	82.51	27.01	1.55	5.5	1.23	2.9	0.8494	224.09	1.29	253.96	43.59	119.7	17.56	178.31	1316.28	0.05	100.49	2.75	15.86	4.24	1.49	81.63
1	46	2	121	35	33	90	65	56	33.8	1.6	5.83	1.23	2.9	1.24	65	1.44	130	20	301	13	90	1316.28	0.05	100.49	3.19	16.6	4.64	1.48	81.63
2	46	2	303.21	9	17	49	12	82.51	27.01	1.55	5.42	1.23	2.9	0.37	224.09	1.29	253.96	43.59	119.7	17.56	178.31	1316.28	0.05	100.49	2.75	15.86	4.24	1.49	81.63
2	46	2	303.21	25.06	26.4	81.06	43	82.51	27.01	1.55	5.5	1.23	2.9	0.8494	224.09	1.29	253.96	43.59	119.7	17.56	178.31	1316.28	0.05	100.49	2.22	14.33	4.74	1.8	81.63
1	46	0	303.21	46	25	82	293.3	92	27.6	1.8	5.47	0.84	3.18	1.5	321	1.03	253.96	43.59	119.7	17.56	178.31	1316.28	0.05	100.49	2.75	15.86	4.24	1.49	81.63
2	46	2	303.21	45	29	47	25	82.51	27.01	1.55	5.02	1.23	2.9	1.06	224.09	1.29	253.96	43.59	119.7	17.56	178.31	1316.28	0.05	100.49	2.75	15.86	4.24	1.49	81.63
2	46	1	303.21	15	20	55	10	82.51	33.7	1.3	4.72	1.23	2.9	0.8494	224.09	1.29	253.96	43.59	119.7	17.56	178.31	1316.28	0.05	100.49	2.75	15.86	4.24	1.49	81.63
[truncated: 961 more rows]

## Sheet: tags
Title	numble	tags
gender	1	male
	2	female
blood type	0	O
	1	A
	2	B
	3	AB
